# Supplementary material for: Permuting Diels–Alder and Robinson annulation stereopatterns
Source: Royal Society of Chemistry journal article supplement (doi:10.1039/c2sc20868g), 2012-01-01

## Permuting Diels-Alder and Robinson Annulation Stereopatterns

Feng Peng, Mingji Dai, Angie R. Angeles and Samuel J. Danishefsky\*

*Department of Chemistry, Columbia University, Havemeyer Hall,  
3000 Broadway, New York, NY 10027; Laboratory for Bioorganic  
Chemistry, Sloan-Kettering Institute for Cancer Research,  
1275 York Avenue, New York, NY 10065*

Supplementary Information

## General information

Unless otherwise noted, all reactions were performed under an argon atmosphere using flame-dried glassware. Toluene, hexanes and  $\text{CH}_2\text{Cl}_2$  were distilled over  $\text{CaH}_2$ . THF and  $\text{Et}_2\text{O}$  were distilled over sodium/benzophenone ketyl. All reagents were commercially available and used without further purification unless indicated otherwise. Thin layer chromatography (TLC) was performed on Silica Gel 60 F254 plates and was visualized with UV light and  $\text{KMnO}_4$  stain. Preparative thin layer chromatography was performed with Merck silica gel 60-F254 coated 0.50 mm plates. Flash chromatography was performed with Sorbent Tech. silica gel 60. Yields reported are for isolated, spectroscopically pure compounds. NMR spectra were recorded on 300, 400 or 500 MHz instruments. The residual solvent protons ( $^1\text{H}$ ) or the solvent carbons ( $^{13}\text{C}$ ) were used as internal standards.  $^1\text{H}$  NMR data are presented as follows: chemical shift in ppm downfield from tetramethylsilane (multiplicity, coupling constant, integration). The following abbreviations are used in reporting NMR data: s, singlet; br s, broad singlet; d, doublet; t, triplet; q, quartet; qt, quartet of triplets; dd, doublet of doublets; dt, doublet of triplets; AB, AB quartet; m, multiplet. High-resolution mass spectra were recorded by the Columbia University Mass Spectrometry Core facility on a JEOL HX110 spectrometer. Infrared spectra were taken on an Perkin-Elmer 1600 FT-IR spectrometer using thin neat film deposition on NaCl plates.

Preparation of enone **22**, **25**, **28**.

These ketones were prepared according to a reported procedure.<sup>1</sup>

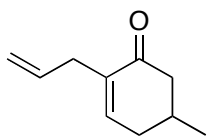

Enone **28**:  $^1\text{H}$  NMR (400 MHz,  $\text{CDCl}_3$ )  $\delta$  6.81-6.55 (m, 1H), 5.98-5.59 (m, 1H), 5.03 (ddd,  $J = 12.7, 2.8, 1.6$  Hz, 2H), 2.94 (ddd,  $J = 3.2, 1.9, 0.9$  Hz, 2H), 2.55-2.47 (m, 1H),

2.46-2.37 (m, 1H), 2.24-1.98 (m, 3H), 1.05 (d,  $J = 6.3$  Hz, 3H);  $^{13}\text{C}$  NMR (100 MHz,  $\text{CDCl}_3$ )  $\delta$  199.1, 144.9, 137.6, 135.8, 116.1, 46.5, 34.33, 33.2, 30.5, 21.1; IR (neat):  $\text{cm}^{-1}$  2959, 2929, 1717, 1680, 1370, 1154; HRMS (EI,  $m/z$ ) calcd for  $\text{C}_{10}\text{H}_{14}\text{O}$   $[\text{M}]^+$  150.1045, found 150.1035.

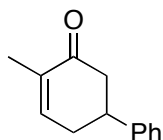

Enone **25**:  $^1\text{H}$  NMR (400 MHz,  $\text{CDCl}_3$ )  $\delta$  7.34-7.21 (m, 4H), 6.78-6.76 (m, 1H), 3.33-3.26 (m, 1H), 2.74-2.1.84 (m, 4H), 1.84 (s, 3H);  $^{13}\text{C}$  NMR (100 MHz,  $\text{CDCl}_3$ )  $\delta$  198.8, 144.2, 143.2, 135.4, 128.4, 126.6, 126.4, 44.7, 41.1, 33.7, 15.5; IR (neat):  $\text{cm}^{-1}$  2930, 1715, 1660, 1148; HRMS (EI,  $m/z$ ) calcd for  $\text{C}_{13}\text{H}_{14}\text{O}$   $[\text{M}]^+$  186.1045, found 186.1038.

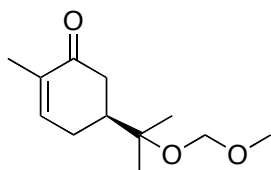

Enone **19**: Enone 19 was prepared from commercial available enone (5*s*)-carvone hydrate (98%) by MOM ether protection.  $^1\text{H}$  NMR (400 MHz,  $\text{CDCl}_3$ )  $\delta$  6.80-6.57 (m, 1H), 4.68 (s, 2H), 3.33 (s, 3H), 2.58 (ddd,  $J = 16.1, 3.4, 1.4$  Hz, 1H), 2.40 (dtd,  $J = 18.2, 4.7, 1.4$  Hz, 1H), 2.31-2.18 (m, 2H), 2.13-2.03 (m, 1H), 1.74 (s, 3H), 1.19 (s, 3H), 1.18 (s, 3H);  $^{13}\text{C}$  NMR (101 MHz,  $\text{CDCl}_3$ )  $\delta$  200.3, 145.0, 135.1, 90.8, 76.5, 55.2, 45.7, 39.4, 27.1, 23.6, 23.6, 15.5; IR (neat):  $\text{cm}^{-1}$  2980, 2892, 1728, 1673, 1143, 1038; HRMS (EI,  $m/z$ ) calcd for  $\text{C}_{12}\text{H}_{21}\text{O}_3$   $[\text{M}+\text{H}]^+$  213.1491, found 213.1487.

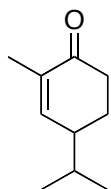

Enone **44**: At room temperature, to a mixture of ethyl vinyl ketone (1.14 mL, 11 mmol) and isovaleraldehyde (0.81 mL 7.5 mmol) was added 2-(methoxydiphenylmethyl) pyrrolidine (50 mg, 0.19 mmol) and ethyl 3, 4-dihydroxy benzoate (136 mg, 0.75 mmol). The reaction mixture was stirred at room temperature for 3 days and diluted with 100 mL of ether. The ether solution was washed with water and transferred to a 250 mL flash. To this ether solution was added 20 mL of THF, 41 mL of KOH solution (0.1 N), and n-Bu<sub>4</sub>NOH (1 mL). The reaction mixture was stirred at 42 °C for 24 h.<sup>2</sup> Upon cooling down, the mixture was extracted with ether. The combined organic solvent was washed with brine, dried with Na<sub>2</sub>SO<sub>4</sub> and concentrated *in vacuo*. The residue was purified using flash chromatography and yielded the enone **44** as a light yellow oil. (820 mg, 72%) <sup>1</sup>H NMR (400 MHz, CDCl<sub>3</sub>) δ 6.65 (dt, *J* = 2.7, 1.4 Hz, 1H), 2.52 (dt, *J* = 16.5, 4.1 Hz, 1H), 2.38-2.19 (m, 2H), 1.96 (dq, *J* = 13.4, 4.7, 1.6 Hz, 1H), 1.78 (dd, *J* = 2.4, 1.4 Hz, 3H), 1.77-1.66 (m, 2H), 0.96 (d, *J* = 6.9 Hz, 3H), 0.94 (d, *J* = 6.9 Hz, 3H); <sup>13</sup>C NMR (101 MHz, CDCl<sub>3</sub>) δ 200.4, 149.5, 135.4, 77.3, 77.0, 76.7, 42.8, 37.6, 31.7, 25.6, 19.7, 19.4, 16.2. IR (neat): cm<sup>-1</sup> 2985, 1725, 1676, 1050; HRMS (EI, *m/z*) calcd for C<sub>10</sub>H<sub>17</sub>O [M+H]<sup>+</sup> 153.1297, found 153.1292.

#### General Experimental Procedure for the Diels-Alder/Isomerization/Oxidation Sequence:

Diels-Alder reaction between silyloxy dienes and enones: To a stirred solution of enone (1 mmol) in anhydrous DCM (5 mL) was added EtAlCl<sub>2</sub> (1M in hexane, 0.5 mL). The mixture was stirred at 0 °C for 3 min and 2-silyloxy diene (2 mmol) was added. The resultant reaction mixture was slowly warmed up to room temperature, stirred for additional 2 h (or until TLC indicated disappearance of enone), and quenched with saturated sodium bicarbonate at -78 °C. After the ice melted, the mixture was extracted with diethyl ether. The organic extracts were dried over MgSO<sub>4</sub>, filtered and concentrated. The residue was purified using flash chromatograph. Compound **11**, **32**, **34** were obtained directly after column purification.

Silica gel-catalyzed isomerization of DA adducts: To a stirred solution of DA adduct (0.5 mmol) in anhydrous toluene (20 mL) was added oven-activated silica gel (200-300 mesh, 500 mg). The resultant mixture was stirred at 110 °C for 20 h. After cooled down to room temperature, the silica gel was filtered and the toluene was removed under reduced pressure and the residue was used without further purification. Compound **15**, **16** were purified using flash chromatography.

Saegusa Oxidation(Method A): To a stirred solution of isomerized silyl enol ether (0.5 mmol) in anhydrous CH<sub>3</sub>CN (5 mL) was added Pd(OAc)<sub>2</sub> (0.55 mmol) at room temperature. The reaction was stirred at room temperature until TLC indicated disappearance of starting material. The reaction mixture was then filtered through a pad of Celite and concentrated. The residue was purified using flash chromatography.

Saegusa Oxidation(Method B): To a stirred solution of isomerized silyl enol ether (0.5 mmol) in anhydrous acetonitrile was added 2, 6-di-tert-butyl- 4-methylpyridine (4 mmol) and DDQ (2mmol).<sup>3</sup> The resultant mixture was stirred at room temperature for about 12 h. Then the mixture was quenched with saturated Na<sub>2</sub>S<sub>2</sub>O<sub>3</sub> and extracted with diethyl ether. The extracts were washed with brine, dried over MgSO<sub>4</sub>, filtered, and concentrated. The residue was purified using flash chromatography.

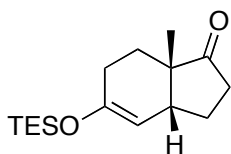

Silyl enol ether **11**: Flash chromatography (hexanes) yielded a colorless oil (235 mg, 82%). <sup>1</sup>H NMR (CDCl<sub>3</sub>, 500 MHz): δ 4.81 (d, *J* = 3.5 Hz, 1H), 2.52 (brs, 1H), 2.33-2.14 (m, 4H), 1.97-1.94 (m, 2H), 1.88-1.83 (m, 1H), 1.65-1.60 (m, 1H); <sup>13</sup>C NMR (CDCl<sub>3</sub>, 125 MHz): δ 222.9, 151.2, 106.3, 47.1, 43.2, 35.7, 28.1, 26.9, 26.5, 21.5, 6.7, 5.0; IR

(neat):  $\text{cm}^{-1}$  2956, 1708, 1674, 1192; HRMS (EI,  $m/z$ ) calcd for  $\text{C}_{16}\text{H}_{28}\text{O}_2\text{Si}$   $[\text{M}]^+$  280.1859, found 280.1845.

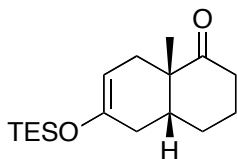

Diels-Alder adduct: Flash chromatography (hexanes) yielded a colorless oil (256 mg, 88%).  $^1\text{H}$  NMR ( $\text{CDCl}_3$ , 400 MHz):  $\delta$  4.76-4.74 (m, 1H), 2.64-2.50 (m, 2H), 2.33-2.24 (m, 2H), 2.03-1.97 (m, 1H), 1.80-1.58 (m, 6H), 1.10 (s, 3H), 0.99-0.95 (m, 9H), 0.68-0.62 (m, 6H);  $^{13}\text{C}$  NMR ( $\text{CDCl}_3$ , 100 MHz):  $\delta$  215.3, 147.7, 99.5, 47.4, 42.3, 37.2, 32.8, 30.8, 28.1, 25.2, 19.9, 6.6, 5.0; IR (neat):  $\text{cm}^{-1}$  2954, 1705, 1675, 1195; HRMS (ESP) calcd for  $\text{C}_{17}\text{H}_{31}\text{O}_2\text{Si}$ : 295.2093; found: 295.2102.

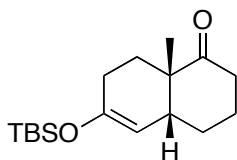

Silyl enol ether **12**: Flash chromatography (hexanes) yielded a colorless oil (226 mg, 90%).  $^1\text{H}$  NMR ( $\text{CDCl}_3$ , 400 MHz):  $\delta$  4.60 (s, 1H), 2.47 (s, 1H), 2.45-2.33 (m, 1H), 2.26 (dd,  $J = 15.5, 4.5$  Hz, 1H), 2.22-2.11 (m, 2H), 2.04 (td,  $J = 13.6, 7.5$  Hz, 1H), 1.92 (dd,  $J = 15.0, 6.2$  Hz, 1H), 1.78 (dt,  $J = 8.7, 5.0$  Hz, 2H), 1.64-1.44 (m, 2H), 1.37-1.21 (m, 1H), 1.16 (s, 3H), 0.90 (s, 9H), 0.10 (s, 3H), 0.09 (s, 3H);  $^{13}\text{C}$  NMR ( $\text{CDCl}_3$ , 125 MHz):  $\delta$  215.3, 151.8, 108.0, 46.8, 42.9, 38.6, 31.3, 28.2, 27.2, 25.6, 24.3, 22.9, 17.9, -4.3, -4.4; IR (neat):  $\text{cm}^{-1}$  2954, 1705, 1675, 1195; HRMS (EI,  $m/z$ ) calcd for  $\text{C}_{17}\text{H}_{31}\text{O}_2\text{Si}$   $[\text{M}+\text{H}]^+$  295.2093, found 295.2092.

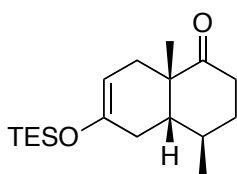

Diels-Alder adduct: Flash chromatography (hexanes) yielded a colorless oil (274 mg, 90%).  $^1\text{H}$  NMR (400 MHz,  $\text{CDCl}_3$ )  $\delta$  4.94-4.52 (m, 1H), 2.74 (td,  $J = 14.5, 6.6$  Hz, 1H), 2.49 (d,  $J = 16.7$  Hz, 1H), 2.34-2.14 (m, 2H), 2.07 (d,  $J = 18.1$  Hz, 1H), 2.01-1.93 (m, 1H), 1.88-1.76 (m, 1H), 1.77-1.58 (m, 1H), 1.36 (ddd,  $J = 18.5, 12.6, 5.8$  Hz, 2H), 1.11 (s, 3H), 0.98 (dd,  $J = 8.8, 7.2$  Hz, 9H), 0.66 (q,  $J = 7.9$  Hz, 6H);  $^{13}\text{C}$  NMR (101 MHz,  $\text{CDCl}_3$ )  $\delta$  215.5, 147.6, 99.6, 48.6, 46.9, 37.2, 34.9, 31.5, 34.9, 31.5, 29.9, 28.8, 20.2, 19.8, 6.7, 5.0; IR (neat):  $\text{cm}^{-1}$  2955, 1707, 1675, 1185; HRMS (EI,  $m/z$ ) calcd for  $\text{C}_{18}\text{H}_{32}\text{O}_2\text{Si}$   $[\text{M}]^+$  308.2172, found 308.2161.

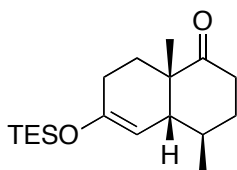

Silyl enol ether **15**: Flash chromatography (hexanes) yielded a colorless oil (245 mg, 86%).  $^1\text{H}$  NMR (400 MHz,  $\text{CDCl}_3$ )  $\delta$  5.04 (d,  $J = 4.2$  Hz, 1H), 2.62-2.46 (m, 1H), 2.32 (ddd,  $J = 14.8, 4.1, 3.2$  Hz, 1H), 2.16-1.95 (m, 3H), 1.92-1.82 (m, 1H), 1.75-1.63 (m, 2H), 1.35 (ddd,  $J = 18.5, 11.3, 5.2$  Hz, 2H), 1.11 (s, 3H), 1.03 (d,  $J = 6.0$  Hz, 3H), 0.99 (t,  $J = 7.9$  Hz, 9H), 0.68 (q,  $J = 7.9$  Hz, 6H);  $^{13}\text{C}$  NMR (101 MHz,  $\text{CDCl}_3$ )  $\delta$  216.6, 149.1, 105.9, 50.0, 46.7, 38.2, 36.6, 33.7, 28.7, 26.4, 19.8, 19.6, 6.7, 5.1; IR (neat):  $\text{cm}^{-1}$  2953, 1705, 1674, 1183; HRMS (EI,  $m/z$ ) calcd for  $\text{C}_{18}\text{H}_{32}\text{O}_2\text{Si}$   $[\text{M}]^+$  308.2172, found 308.2169.

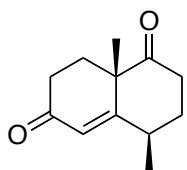

Enone **17a**: Flash chromatography yielded a light yellow oil (65 mg, 68%).  $^1\text{H}$  NMR (400 MHz,  $\text{CDCl}_3$ )  $\delta$  5.95 (s, 1H), 2.81 (dd,  $J = 14.4, 7.0$  Hz, 1H), 2.72 (ddd,  $J = 16.6, 7.0, 4.6$  Hz, 1H), 2.57-2.44 (m, 2H), 2.40-2.28 (m, 1H), 2.18 (ddd,  $J = 13.9, 5.0, 2.6$  Hz, 1H), 2.13-2.03 (m, 1H), 1.98 (td,  $J = 13.9, 5.6$  Hz, 1H), 1.91-1.78 (m, 1H), 1.47 (s, 3H), 1.36 (d,  $J = 7.3$  Hz, 3H);  $^{13}\text{C}$  NMR (101 MHz,  $\text{CDCl}_3$ )  $\delta$  211.8, 198.5, 170.1, 127.1, 48.9, 36.2, 33.2, 31.5, 27.4, 24.1, 22.4; IR (neat):  $\text{cm}^{-1}$  2928, 1712, 1671, 1611; HRMS (EI,  $m/z$ ) calcd for  $\text{C}_{12}\text{H}_{17}\text{O}_2$   $[\text{M}+\text{H}]^+$  193.1229, found 193.1221.

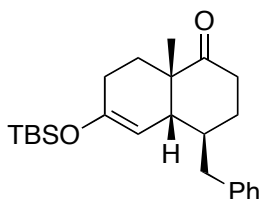

Silyl enol ether **16**: Flash chromatography (hexanes) yielded a colorless oil (214 mg, 56%).  $^1\text{H}$  NMR (400 MHz,  $\text{CDCl}_3$ )  $\delta$  7.44-6.89 (m, 5H), 4.85 (d,  $J = 4.9$  Hz, 1H), 3.15 (dd,  $J = 13.3, 3.5$  Hz, 1H), 2.60-2.50 (m, 2H), 2.38-1.38 (m, 8H), 1.28 (dd,  $J = 11.4, 4.9$  Hz, 1H), 1.18 (s, 3H), 0.98 (s, 9H), 0.23 (s, 3H), 0.20 (s, 3H);  $^{13}\text{C}$  NMR (101 MHz,  $\text{CDCl}_3$ )  $\delta$  215.4, 147.6, 140.1, 129.2, 128.3, 126.0, 100.1, 47.0, 46.9, 40.2, 36.8, 36.3, 31.4, 31.1, 28.7, 25.8, 25.7, 20.0, 18.0, -4.1, -4.3; IR (neat):  $\text{cm}^{-1}$  2930, 1708, 1674, 1176; HRMS (EI,  $m/z$ ) calcd for  $\text{C}_{24}\text{H}_{37}\text{O}_2\text{Si}$   $[\text{M}+\text{H}]^+$  385.2563, found 385.1535.

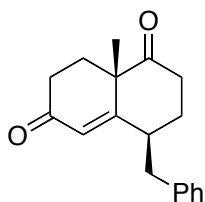

Enone **18**: Flash chromatography yielded a light yellow oil (87 mg, 65%).  $^1\text{H}$  NMR (400 MHz,  $\text{CDCl}_3$ )  $\delta$  7.42-6.90 (m, 5H), 5.92 (s, 1H), 3.04 (dd,  $J = 11.8, 4.2$  Hz, 1H), 2.99-



2.85 (m, 2H), 2.72 (ddd,  $J = 16.2, 7.7, 4.6$  Hz, 1H), 2.60-2.41 (m, 2H), 2.37-2.26 (m, 1H), 2.20 (ddd,  $J = 13.9, 4.9, 2.7$  Hz, 1H), 2.01 (dd,  $J = 13.8, 5.6$  Hz, 1H), 1.97-1.77 (m, 2H), 1.48 (s, 3H);  $^{13}\text{C}$  NMR (101 MHz,  $\text{CDCl}_3$ )  $\delta$  211.6, 198.2, 167.4, 138.6, 129.0, 128.6, 128.1, 126.8, 48.9, 43.8, 42.7, 36.0, 33.2, 31.7, 24.6, 23.9; IR (neat):  $\text{cm}^{-1}$  2925, 1716, 1674, 1230; HRMS (EI,  $m/z$ ) calcd for  $\text{C}_{18}\text{H}_{21}\text{O}_2$   $[\text{M}+\text{H}]^+$  269.1542, found 269.1544.

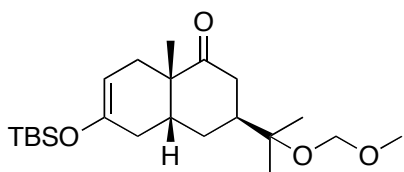

Diels-Alder adduct: Flash chromatography yielded a colorless oil (376 mg, 95%).  $^1\text{H}$  NMR (400 MHz,  $\text{CDCl}_3$ )  $\delta$  4.75 (dd,  $J = 4.3, 3.4$  Hz, 1H), 4.70 (d,  $J = 0.8$  Hz, 2H), 3.35 (s, 3H), 2.66-2.45 (m, 2H), 2.41-2.30 (m, 1H), 2.26-2.19 (m, 1H), 2.12-1.97 (m, 3H), 1.91-1.80 (m, 1H), 1.73 (ddd,  $J = 17.0, 5.2, 2.7$  Hz, 1H), 1.68-1.58 (m, 1H), 1.24 (s, 3H), 1.21 (s, 6H), 0.90 (s, 9H), 0.11 (s, 3H), 0.10 (s, 3H);  $^{13}\text{C}$  NMR (100 MHz,  $\text{CDCl}_3$ )  $\delta$  215.1, 147.6, 101.6, 91.0, 77.4, 55.3, 46.1, 43.7, 39.0, 38.0, 32.3, 31.1, 26.0, 25.7, 24.2, 24.2, 24.0, 17.9, -4.4, -4.5; IR (neat):  $\text{cm}^{-1}$  2954, 2931, 1708, 1194, 1040; HRMS (EI,  $m/z$ ) calcd for  $\text{C}_{22}\text{H}_{39}\text{O}_4\text{Si}$   $[\text{M}+\text{H}]^+$  395.2618, found 395.2625.

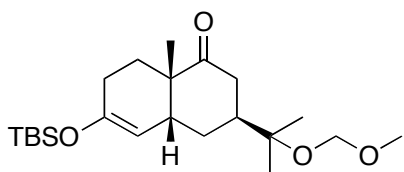

Silyl enol ether **20**: Flash chromatography yielded a colorless oil (356 mg, 96%).  $^1\text{H}$  NMR (400 MHz,  $\text{CDCl}_3$ )  $\delta$  4.84-4.64 (m, 2H), 4.53 (s, 1H), 3.35 (s, 3H), 2.60 (d,  $J = 2.9$  Hz, 1H), 2.35 (dd,  $J = 6.2, 4.6$  Hz, 1H), 2.25-2.15 (m, 2H), 2.04-1.83 (m, 4H), 1.67 (d,  $J = 10.6$  Hz, 1H), 1.28 (ddd,  $J = 18.8, 9.9, 6.2$  Hz, 1H), 1.21 (s, 3H), 1.20 (s, 3H), 1.16 (s, 3H), 0.89 (s, 9H), 0.09 (s, 3H), 0.08 (s, 3H);  $^{13}\text{C}$  NMR (100 MHz,  $\text{CDCl}_3$ )  $\delta$  215.3, 152.3, 108.3, 90.8, 76.9, 55.2, 45.9, 44.2, 41.7, 39.7, 31.8, 28.2, 27.2, 25.6, 25.5, 24.1, 23.9,

17.9, -4.2, -4.4; IR (neat):  $\text{cm}^{-1}$  2931, 2857, 1704, 1196, 1041; HRMS (EI,  $m/z$ ) calcd for  $\text{C}_{22}\text{H}_{39}\text{O}_4\text{Si}$   $[\text{M}+\text{H}]^+$  395.2618, found 395.2612.

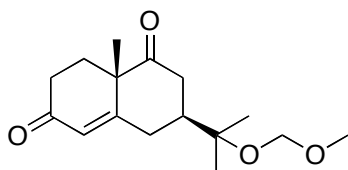

Enone **21**: Flash chromatography (hexanes) yielded a colorless oil (224 mg, 80%).  $^1\text{H}$  NMR (400 MHz,  $\text{CDCl}_3$ )  $\delta$  5.90 (d,  $J = 1.6$  Hz, 1H), 4.76-4.69 (m, 2H), 3.37 (s, 3H), 2.75-2.53 (m, 4H), 2.49-2.42 (m, 2H), 2.14-2.07 (m, 2H), 1.85 (tt,  $J = 12.4, 4.4$  Hz, 1H), 1.44 (s, 3H), 1.28 (s, 3H), 1.25 (s, 3H);  $^{13}\text{C}$  NMR (101 MHz,  $\text{CDCl}_3$ )  $\delta$  211.5, 198.3, 165.4, 126.4, 91.1, 76.4, 55.4, 49.8, 45.5, 39.1, 33.6, 32.9, 29.7, 24.1, 23.8, 23.2; IR (neat):  $\text{cm}^{-1}$  2927, 1712, 1673, 1037; HRMS (EI,  $m/z$ ) calcd for  $\text{C}_{16}\text{H}_{24}\text{O}_4$   $[\text{M}]^+$   $\text{C}_{16}\text{H}_{24}\text{O}_4$ : 280.1675; found: 280.1683.

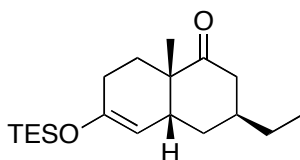

Silyl enol ether **23**: Flash chromatography yielded a colorless oil (272 mg, 85%).  $^1\text{H}$  NMR (400 MHz,  $\text{CDCl}_3$ )  $\delta$  4.55 (s, 1H), 2.55 (d,  $J = 1.4$  Hz, 1H), 2.38-2.14 (m, 3H), 2.07 (dd,  $J = 15.1, 12.0$  Hz, 1H), 1.93-1.81 (m, 1H), 1.83-1.69 (m, 2H), 1.44-1.21 (m, 4H), 0.94 (t,  $J = 7.9$  Hz, 9H), 0.89 (t,  $J = 7.4$  Hz, 3H), 0.61 (q,  $J = 7.8$  Hz, 6H);  $^{13}\text{C}$  NMR (101 MHz,  $\text{CDCl}_3$ )  $\delta$  214.8, 151.8, 108.0, 46.1, 44.7, 42.0, 36.1, 34.0, 31.8, 29.3, 27.1, 25.3, 11.2, 6.6, 5.0; IR (neat):  $\text{cm}^{-1}$  2952, 1707, 1195; HRMS (EI,  $m/z$ ) calcd for  $\text{C}_{19}\text{H}_{34}\text{O}_2\text{Si}$   $[\text{M}]^+$  322.2328, found 322.2325.

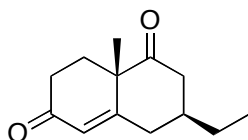

Enone **24**: Flash chromatography yielded a colorless oil (80 mg, 77%).  $^1\text{H}$  NMR (500 MHz,  $\text{CDCl}_3$ )  $\delta$  5.86 (s, 1H), 2.63-2.35 (m, 6H), 2.20-2.03 (m, 2H), 1.70 (m, 1H), 1.55-1.45 (m, 2H), 1.43 (s, 3H), 0.96 (t,  $J = 7.4$  Hz, 3H);  $^{13}\text{C}$  NMR (75 MHz,  $\text{CDCl}_3$ )  $\delta$  210.8, 198.5, 165.1, 125.9, 50.0, 43.8, 38.4, 37.3, 33.6, 29.6, 29.5, 23.3, 10.9; IR (neat):  $\text{cm}^{-1}$  2950, 1710, 1192; HRMS (EI,  $m/z$ ) calcd for  $\text{C}_{13}\text{H}_{19}\text{O}_2$   $[\text{M}+\text{H}]^+$  207.1385, found 207.1399.

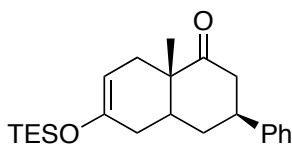

Diels-Alder adduct: Flash chromatography yielded a colorless oil (334 mg, 90%).  $^1\text{H}$  NMR ( $\text{CDCl}_3$ , 400 MHz):  $\delta$  7.54-6.89 (m, 5H), 4.80 (s, 1H), 3.47 (dd,  $J = 12.0, 6.1$  Hz, 1H), 2.78 (dd,  $J = 6.4, 3.1$  Hz, 2H), 2.64 (d,  $J = 16.2$  Hz, 1H), 2.37-1.95 (m, 4H), 1.82 (dd,  $J = 28.5, 10.4$  Hz, 2H), 1.24 (s, 3H), 0.98 (t,  $J = 7.9$  Hz, 9H), 0.66 (q,  $J = 7.9$  Hz, 6H);  $^{13}\text{C}$  NMR ( $\text{CDCl}_3$ , 100 MHz):  $\delta$  214.5, 147.7, 144.6, 128.5, 127.1, 126.4, 100.3, 47.0, 42.0, 39.7, 37.6, 34.2, 32.4, 31.2, 22.2, 6.7, 5.0; IR (neat):  $\text{cm}^{-1}$  2968, 1709, 1650; HRMS (EI,  $m/z$ ) calcd for  $\text{C}_{23}\text{H}_{34}\text{O}_2\text{Si}$   $[\text{M}]^+$  370.2328, found 370.2356.

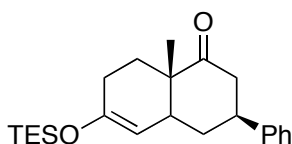

Silyl enol ether **26** : Flash chromatography (hexanes) yielded a colorless oil (305 mg, 92%).  $^1\text{H}$  NMR ( $\text{CDCl}_3$ , 400 MHz):  $\delta$  7.36-7.32 (m, 2H), 7.24-7.21 (m, 3H), 4.65 (br s,

1H), 3.13 (dddd,  $J = 12.8, 12.8, 3.6, 3.6$  Hz, 1H), 2.69 (br s, 1H), 2.64 (dd,  $J = 15.3, 13.2$ , 1H), 2.46 (ddd,  $J = 15.2, 4, 2$  Hz, 1H), 2.36-2.25 (m, 3H), 1.96-1.91 (m, 1H), 1.82-1.78 (m, 1H), 1.40-1.32 (m, 1H), 1.27 (s, 3H), 0.98 (t,  $J = 8$  Hz, 9H), 0.68 (q,  $J = 8$  Hz, 6H);  $^{13}\text{C}$  NMR ( $\text{CDCl}_3$ , 100 MHz):  $\delta$  213.7, 152.6, 144.6, 128.7, 126.6, 107.5, 46.0, 45.7, 42.3, 40.0, 35.1, 31.9, 27.2, 25.6, 6.6, 5.1; IR (neat):  $\text{cm}^{-1}$  2954, 1705, 1640; HRMS (EI,  $m/z$ ) calcd for  $\text{C}_{23}\text{H}_{35}\text{O}_2\text{Si}$   $[\text{M}+\text{H}]^+$  371.2406, found 371.2388.

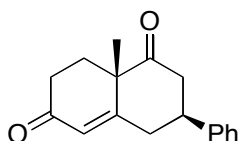

Enone **27**: Flash chromatography (20% EtOAc/Hexane) yielded a colorless oil (90 mg, 72%).  $^1\text{H}$  NMR ( $\text{CDCl}_3$ , 400 MHz):  $\delta$  7.39-7.36 (m, 2H), 7.30-7.24 (m, 3H), 5.92 (s, 1H), 3.00-2.95 (m, 3H), 2.73-2.70 (m, 2H), 2.53-2.48 (m, 2H), 2.20-2.18 (m, 2H), 1.54 (s, 3H);  $^{13}\text{C}$  NMR ( $\text{CDCl}_3$ , 100 MHz):  $\delta$  209.9, 198.2, 164.1, 142.2, 129.0, 127.4, 126.5, 126.4, 49.9, 45.1, 41.1, 39.8, 33.6, 29.6, 23.4; IR (neat):  $\text{cm}^{-1}$  2953, 1713, 1670, 1620, 1167; HRMS (EI,  $m/z$ ) calcd for  $\text{C}_{17}\text{H}_{19}\text{O}_2$   $[\text{M}+\text{H}]^+$  255.1385, found 255.1383.

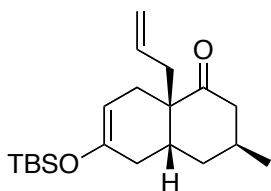

Diels-Alder adduct: Flash chromatography (20% EtOAc/Hexane) yielded a colorless oil (267 mg, 79%).  $^1\text{H}$  NMR (400 MHz,  $\text{CDCl}_3$ )  $\delta$  5.69 (dddd,  $J = 16.8, 10.1, 8.1, 6.6$  Hz, 1H), 5.12-4.95 (m, 2H), 4.76 (dd,  $J = 4.6, 3.2$  Hz, 1H), 2.56 (dd,  $J = 14.6, 5.8$  Hz, 2H), 2.46-2.39 (m, 2H), 2.34-2.23 (m, 2H), 2.15 (dd,  $J = 14.1, 7.2$  Hz, 2H), 1.89-1.58 (m, 4H), 1.01 (d,  $J = 6.8$  Hz, 3H), 0.91 (s, 9H), 0.12 (s, 3H), 0.12 (s, 3H);  $^{13}\text{C}$  NMR (101 MHz,  $\text{CDCl}_3$ )  $\delta$  213.8, 147.8, 133.9, 117.6, 100.7, 50.2, 45.0, 39.8, 34.9, 33.7, 31.9, 29.5, 29.3, 25.6, 21.2, 17.9, -4.3, -4.4; IR (neat):  $\text{cm}^{-1}$  2955, 2929, 2857, 1707, 1193; HRMS (EI,  $m/z$ ) calcd for  $\text{C}_{20}\text{H}_{35}\text{O}_2\text{Si}$   $[\text{M}+\text{H}]^+$  335.2406, found 335.2390.

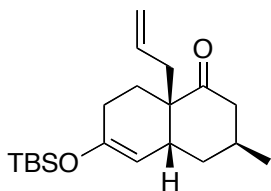

Silyl enol ether **29**: Flash chromatography (hexanes) yielded a colorless oil (240 mg, 90%).  $^1\text{H}$  NMR (400 MHz,  $\text{CDCl}_3$ )  $\delta$  5.63 (ddt,  $J = 17.6, 10.4, 7.4$  Hz, 1H), 5.09-4.93 (m, 2H), 4.55 (s, 1H), 2.65 (br s, 2H), 2.45 (dd,  $J = 14.0, 7.2$  Hz, 2H), 2.27-1.39 (m, 8H), 1.00 (d,  $J = 6.2$  Hz, 3H), 0.89 (s, 9H), 0.07 (s, 6H);  $^{13}\text{C}$  NMR (101 MHz,  $\text{CDCl}_3$ )  $\delta$  213.1, 151.8, 132.8, 118.1, 108.2, 49.3, 47.4, 41.6, 40.0, 36.0, 29.4, 28.4, 26.9, 25.7, 25.6, 22.1, -4.3, -4.4; IR (neat):  $\text{cm}^{-1}$  2954, 1707, 1194; HRMS (EI,  $m/z$ ) calcd for  $\text{C}_{20}\text{H}_{35}\text{O}_2\text{Si}$   $[\text{M}+\text{H}]^+$  335.2406, found 335.2390.

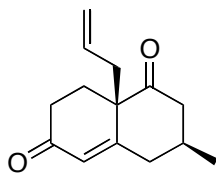

Enone **27**: Flash chromatography (20% EtOAc/Hexane) yielded a colorless oil (77 mg, 71%).  $^1\text{H}$  NMR (400 MHz,  $\text{CDCl}_3$ )  $\delta$  5.89 (s, 1H), 5.58 (ddt,  $J = 17.5, 10.5, 7.4$  Hz, 1H), 5.22-5.02 (m, 2H), 2.64 (dd,  $J = 14.9, 6.5$  Hz, 1H), 2.57-2.36 (m, 7H), 2.24 (dt,  $J = 14.5, 4.4$  Hz, 1H), 2.03 (dt,  $J = 14.5, 9.8$  Hz, 1H), 1.91 (ddt,  $J = 19.6, 13.1, 6.6$  Hz, 1H), 1.13 (d,  $J = 6.4$  Hz, 3H);  $^{13}\text{C}$  NMR (101 MHz,  $\text{CDCl}_3$ )  $\delta$  208.9, 198.3, 164.0, 131.5, 126.5, 119.4, 53.5, 46.7, 40.6, 39.8, 33.3, 31.3, 29.7, 26.0, 22.0; IR (neat):  $\text{cm}^{-1}$  2925, 1710, 1675; HRMS (EI,  $m/z$ ) calcd for  $\text{C}_{14}\text{H}_{18}\text{O}_2$   $[\text{M}]^+$  218.1307, found 218.1299.

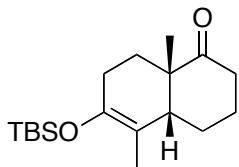

Silyl enol ether **32**: Flash chromatography (hexanes) yielded a colorless oil (262 mg, 85%).  $^1\text{H}$  NMR (400 MHz,  $\text{CDCl}_3$ )  $\delta$  2.43-2.29 (m, 2H), 2.16-1.93 (m, 5H), 1.87-1.72 (m, 1H), 1.69-1.61 (m, 2H), 1.26 (dt,  $J = 6.8, 3.8$  Hz, 1H), 1.12 (s, 3H), 0.93 (s, 9H), 0.09 (s, 3H);  $^{13}\text{C}$  NMR (101 MHz,  $\text{CDCl}_3$ )  $\delta$  215.9, 143.6, 113.1, 48.5, 47.7, 38.4, 29.5, 27.1, 26.8, 25.8, 23.6, 21.8, 18.1, 14.7, -3.8, -3.8; IR (neat):  $\text{cm}^{-1}$  2932, 2858, 1703, 1682, 1173; HRMS (EI,  $m/z$ ) calcd for  $\text{C}_{18}\text{H}_{32}\text{O}_2\text{Si}$   $[\text{M}]^+$  308.2172, found 308.2176.

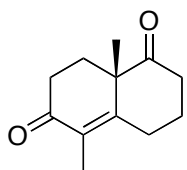

Enone **33**: Flash chromatography (20% EtOAc/Hexane) yielded a colorless oil (77 mg, 82%).  $^1\text{H}$  NMR (400 MHz,  $\text{CDCl}_3$ )  $\delta$  2.87 (dt,  $J = 16.0, 4.8$  Hz, 1H), 2.67 (ddd,  $J = 16.1, 10.4, 6.0$  Hz, 1H), 2.57-2.37 (m, 4H), 2.20-2.01 (m, 3H), 1.80 (d,  $J = 1.0$  Hz, 3H), 1.79-1.70 (m, 1H), 1.41 (s, 3H);  $^{13}\text{C}$  NMR (101 MHz,  $\text{CDCl}_3$ )  $\delta$  212.1, 197.6, 158.1, 130.8, 50.6, 37.3, 33.3, 29.6, 27.2, 23.3, 21.5, 11.3; IR (neat):  $\text{cm}^{-1}$  2951, 1710, 1666, 1611; HRMS (EI,  $m/z$ ) calcd for  $\text{C}_{12}\text{H}_{16}\text{O}_2$   $[\text{M}]^+$  192.1150, found 192.1156.

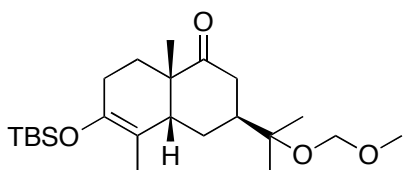

Silyl enol ether **34**: Flash chromatography (hexanes) yielded a colorless oil (385 mg, 94%).  $^1\text{H}$  NMR (400 MHz,  $\text{CDCl}_3$ )  $\delta$  4.68 (s, 2H), 3.35 (s, 3H), 2.45 (s, 1H), 2.35 (d,  $J = 8.8$  Hz, 2H), 2.26-2.09 (m, 2H), 1.99 (dd,  $J = 13.9, 3.7$  Hz, 1H), 1.94-1.80 (m, 2H), 1.68-

1.60 (m, 1H), 1.57 (s, 3H), 1.32-1.23 (m, 1H), 1.21 (s, 3H), 1.21 (s, 2H), 1.16 (s, 3H), 0.92 (s, 9H), 0.07 (s, 3H), 0.05 (s, 3H).  $^{13}\text{C}$  NMR (101 MHz,  $\text{CDCl}_3$ )  $\delta$  215.5, 145.9, 112.3, 90.8, 76.8, 55.1, 46.7, 45.9, 43.2, 39.7, 31.2, 27.7, 25.9, 25.8, 24.9, 23.8, 23.7, 18.2, 13.4, -3.8, -4.0; IR (neat):  $\text{cm}^{-1}$  2932, 1704, 1196, 1042; HRMS (EI,  $m/z$ ) calcd for  $\text{C}_{23}\text{H}_{42}\text{O}_4\text{Si}$   $[\text{M}]^+$  410.2852, found 410.2846.

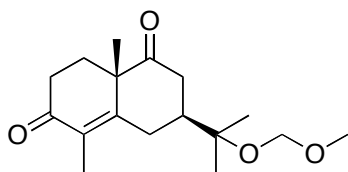

Enone **35**: Flash chromatography (20% EtOAc/Hexane) yielded a colorless oil (117 mg, 79%).  $^1\text{H}$  NMR (400 MHz,  $\text{CDCl}_3$ )  $\delta$  4.73 (d,  $J = 1.5$  Hz, 2H), 3.38 (s, 3H), 3.05 (ddd,  $J = 14.1, 3.5, 2.0$  Hz, 1H), 2.65 (dd,  $J = 15.1, 11.5$  Hz, 1H), 2.59-2.45 (m, 3H), 2.30 (t,  $J = 13.5$  Hz, 1H), 2.13-1.98 (m, 2H), 1.84 (s, 3H), 1.83-1.76 (m, 1H), 1.41 (s, 3H), 1.29 (s, 3H), 1.27 (s, 3H).  $^{13}\text{C}$  NMR (101 MHz,  $\text{CDCl}_3$ )  $\delta$  212.4, 197.7, 157.9, 130.8, 91.0, 76.8, 55.4, 50.5, 44.9, 38.8, 33.4, 29.6, 28.3, 23.9, 23.6, 23.1, 11.3; IR (neat):  $\text{cm}^{-1}$  2973, 1710, 1664, 1140; HRMS (EI,  $m/z$ ) calcd for  $\text{C}_{17}\text{H}_{27}\text{O}_4$   $[\text{M}+\text{H}]^+$  295.1909, found 295.1898.

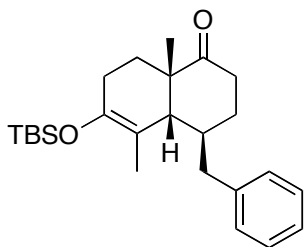

Silyl enol ether **36**: Flash chromatography (hexanes) yielded a colorless oil (318 mg, 81%).  $^1\text{H}$  NMR (400 MHz,  $\text{CDCl}_3$ )  $\delta$  7.31 (dd,  $J = 14.0, 6.4$  Hz, 2H), 7.22 (t,  $J = 7.3$  Hz, 1H), 7.16 (d,  $J = 7.3$  Hz, 2H), 3.17 (dd,  $J = 12.9, 3.7$  Hz, 1H), 2.43 (ddd,  $J = 15.2, 12.9, 6.3$  Hz, 1H), 2.32-2.12 (m, 5H), 2.08-1.96 (m, 1H), 1.85 (d,  $J = 9.7$  Hz, 1H), 1.79 (s, 3H), 1.73 (ddd,  $J = 13.3, 6.4, 3.3$  Hz, 1H), 1.41 (dd,  $J = 10.8, 6.8$  Hz, 1H), 1.27 (ddd,  $J = 24.6, 13.0, 5.0$  Hz, 1H), 1.14 (s, 3H), 1.01 (s, 9H), 0.22 (s, 3H), 0.20 (s, 3H).

;  $^{13}\text{C}$  NMR (101 MHz,  $\text{CDCl}_3$ )  $\delta$  216.2, 144.2, 141.0, 129.0, 128.3, 125.9, 113.4, 55.2, 48.3, 43.6, 41.1, 37.1, 29.2, 28.9, 26.8, 25.9, 19.9, 19.6, 18.3, -3.6, -3.7.; IR (neat):  $\text{cm}^{-1}$  2955, 1708, 1672, 1176; HRMS (EI,  $m/z$ ) calcd for  $\text{C}_{18}\text{H}_{32}\text{O}_2\text{Si}$   $[\text{M}]^+$  308.2172, found 308.2176.

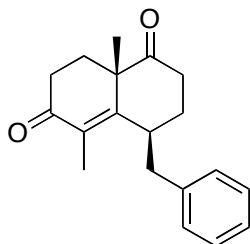

Enone **36**: Flash chromatography (20% EtOAc/Hexane) yielded a colorless oil (80 mg, 57%).  $^1\text{H}$  NMR (400 MHz,  $\text{CDCl}_3$ )  $\delta$  7.34 (m, 3H), 7.23 (d,  $J = 7.2$  Hz, 2H), 3.34-3.23 (m, 1H), 3.05 (dd,  $J = 13.6, 3.7$  Hz, 1H), 2.70 (dd,  $J = 13.4, 11.4$  Hz, 1H), 2.66-2.50 (m, 3H), 2.26 (ddd,  $J = 15.5, 11.1, 4.6$  Hz, 1H), 2.19-2.12 (m, 1H), 1.98 (s, 3H), 1.96-1.92 (m, 1H), 1.91-1.84 (m, 1H), 1.82-1.70 (m, 1H), 1.50 (s, 3H).  $^{13}\text{C}$  NMR (101 MHz,  $\text{CDCl}_3$ )  $\delta$  212.8, 198.0, 160.7, 139.7, 133.3, 128.8, 128.7, 126.8, 49.3, 40.9, 40.7, 36.2, 33.1, 31.4, 24.5, 23.9, 11.7. IR (neat):  $\text{cm}^{-1}$  2926, 1712, 1674; HRMS (EI,  $m/z$ ) calcd for  $\text{C}_{19}\text{H}_{22}\text{O}_2$   $[\text{M}]^+$  282.1620, found 282.1619.

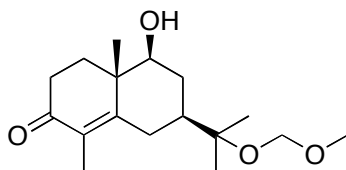

Enone **39**: To a solution of enone **35** (52 mg, 0.18 mmol) in ethanol (5 mL) at  $0^\circ\text{C}$  was added  $\text{NaBH}_4$  (3.8 mg, 0.1 mmol). 1 hour later, the reaction was quenched with saturated  $\text{NH}_4\text{Cl}$  solution and extracted with ether. The combined organic solution was dried over  $\text{MgSO}_4$  and concentrated. The residue was purified using flash chromatography (20% EtOAc/Hexane) and yielded a colorless oil (49 mg, 95%).  $^1\text{H}$  NMR (400 MHz,  $\text{CDCl}_3$ )  $\delta$  4.72 (d,  $J = 1.5$  Hz, 2H), 3.45-3.41 (m, 1H), 3.38 (s, 3H), 2.81 (dd,  $J = 14.1, 2.8$  Hz, 1H),



2.46-2.42 (m, 2H), 2.12 (ddd,  $J = 13.2, 13.2, 4.4$  Hz, 1H), 1.98-1.92 (m, 2H), 1.80 (s, 3H), 1.84-1.76 (m, 1H), 1.60-1.54 (m, 2H), 1.26 (s, 3H), 1.25 (s, 3H), 1.16 (s, 3H).  $^{13}\text{C}$  NMR (101 MHz,  $\text{CDCl}_3$ )  $\delta$  198.8, 160.3, 130.5, 90.8, 78.4, 55.2, 44.6, 41.4, 33.4, 33.3, 31.1, 27.9, 24.0, 23.4, 15.7, 11.3; IR (neat):  $\text{cm}^{-1}$  3437, 2948, 1654, 1610, 1369, 1144, 1039; HRMS (EI,  $m/z$ ) calcd for  $\text{C}_{17}\text{H}_{29}\text{O}_4$   $[\text{M}+\text{H}]^+$  297.2066, found 297.2061.

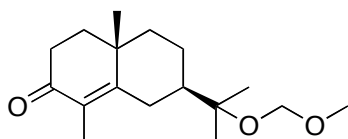

**Compound 40:** To a solution of enone **39** (10 mg, 0.03 mmol) in dichloroethane (3 mL) was added TCDI (32 mg, 0.18 mmol) and DMAP (3mg, 0.03mmol). The reaction mixture was stirred at 50 °C for 4 h and cooled down to room temperature. Then dichloroethane was removed under reduced pressure. To this residue was added anhydrous toluene (3 mL), tributyltin hydride (10 mL) and AIBN (1 mg) under argon. The reaction mixture was stirred at 90 °C for 3 h and cooled down to room temperature. The mixture was purified using flash chromatography directly and yielded a colorless oil. (6 mg, 65%)

$^1\text{H}$  NMR (400 MHz,  $\text{CDCl}_3$ )  $\delta$  4.82-4.54 (m, 2H), 3.38 (s, 3H), 2.86 (d,  $J = 14.4$  Hz, 1H), 2.60-2.45 (m, 1H), 2.44-2.32 (m, 1H), 1.92 (t,  $J = 13$  Hz, 1H), 1.78 (s, 3H), 1.77-1.65 (m, 4H), 1.48-1.32 (m, 4H), 1.25 (s, 3H), 1.24 (s, 3H), 1.20 (s, 3H);  $^{13}\text{C}$  NMR (101 MHz,  $\text{CDCl}_3$ )  $\delta$  199.1, 162.9, 128.8, 90.8, 77.8, 55.2, 48.7, 42.0, 37.4, 35.9, 33.8, 29.7, 28.6, 24.1, 23.3, 22.5, 10.9; IR (neat):  $\text{cm}^{-1}$  2924, 1662, 1461, 1141, 1040; HRMS (EI,  $m/z$ ) calcd for  $\text{C}_{17}\text{H}_{19}\text{O}_3$   $[\text{M}+\text{H}]^+$  281.2117, found 281.2110.

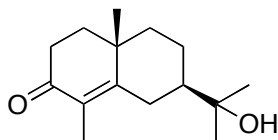

(+)-carissone **41**: To a solution of compound **40** (6 mg, 0.02 mmol) in anhydrous dichloromethane (2 mL) at  $-78\text{ }^{\circ}\text{C}$  was added  $\text{Me}_2\text{BBr}$  (2 mL). 5 mins later, the reaction mixture was quenched with saturated  $\text{NaHCO}_3$ . Upon warming up to room temperature, the mixture was extracted with ether, dried over  $\text{MgSO}_4$  and concentrated *in vacuo*. The residue was purified using flash chromatography and yielded a colorless oil. (4.3 mg, 90%)  $^1\text{H}$  NMR (400 MHz,  $\text{CDCl}_3$ )  $\delta$  2.90-2.82 (m, 1H), 2.52 (ddd,  $J = 16.9, 12.9, 6.8$  Hz, 1H), 2.39 (dt,  $J = 16.9, 4.2$  Hz, 1H), 1.90 (t,  $J = 13.5$  Hz, 1H), 1.78 (d,  $J = 1.1$  Hz, 3H), 1.78-1.68 (m, 4H), 1.54-1.33 (m, 4H), 1.26 (s, 3H), 1.25 (s, 3H), 1.20 (s, 3H).  $^{13}\text{C}$  NMR (101 MHz,  $\text{CDCl}_3$ )  $\delta$  199.1, 162.6, 128.9, 72.5, 49.6, 41.9, 37.4, 35.8, 33.8, 28.7, 27.5, 26.8, 22.6, 22.5, 10.9; IR (neat):  $\text{cm}^{-1}$  3408, 2928, 1652, 1607, 1378, 1148; HRMS (EI,  $m/z$ ) calcd for  $\text{C}_{15}\text{H}_{25}\text{O}_2$   $[\text{M}+\text{H}]^+$  237.1855, found 237.1865;  $[\alpha]_{\text{D}}^{22} = +89^{\circ}$  (c 0.00075  $\text{CHCl}_3$ ).

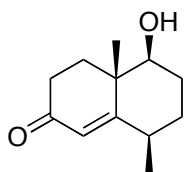

Procedure was the same as the preparation of compound 39.

$^1\text{H}$  NMR (400 MHz,  $\text{CDCl}_3$ )  $\delta$  5.83 (s, 1H), 3.44 (d,  $J = 11.8$  Hz, 1H), 2.69-2.57 (m, 1H), 2.57-2.47 (m, 1H), 2.42 (d,  $J = 17.5$  Hz, 1H), 2.29-2.13 (m, 1H), 2.00-1.87 (m, 1H), 1.86-1.62 (m, 3H), 1.51 (d,  $J = 7.9$  Hz, 1H), 1.29 (s, 3H), 1.24 (d,  $J = 7.6$  Hz, 3H);  $^{13}\text{C}$  NMR (101 MHz,  $\text{CDCl}_3$ )  $\delta$  199.8, 173.2, 126.5, 78.7, 41.2, 37.4, 36.5, 33.9, 28.8, 25.9, 22.5, 17.8; IR (neat):  $\text{cm}^{-1}$  3401, 2937, 1659, 1606, 1455, 1076; HRMS (EI,  $m/z$ ) calcd for  $\text{C}_{12}\text{H}_{19}\text{O}_2$   $[\text{M}+\text{H}]^+$  195.1385, found 195.1378.

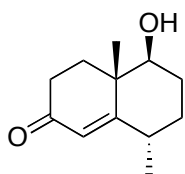

to a solution of compound in DCM (2 mL) was added HClO<sub>4</sub> (0.2 mL). the mixture was stirred at room temperature for 12 h and quenched with water. The mixture was extracted with DCM and dried over MgSO<sub>4</sub>. The solution was concentrated in vacuo and purified using chromatography.

<sup>1</sup>H NMR (400 MHz, CDCl<sub>3</sub>) δ 5.83 (d, *J* = 1.7 Hz, 1H), 3.45 (dd, *J* = 11.5, 4.4 Hz, 1H), 2.60-2.33 (m, 3H), 2.17 (dt, *J* = 13.5, 4.7 Hz, 1H), 1.93-1.67 (m, 4H), 1.21 (s, 3H), 1.08 (d, *J* = 6.5 Hz, 3H); <sup>13</sup>C NMR (101 MHz, CDCl<sub>3</sub>) δ 199.7, 171.1, 123.2, 78.2, 41.7, 34.5, 33.5, 33.4, 32.1, 30.3, 17.7, 16.3; IR (neat): cm<sup>-1</sup> 3402, 2920, 1659, 1610, 1458, 1054; HRMS (EI, *m/z*) calcd for C<sub>12</sub>H<sub>19</sub>O<sub>2</sub>[M+H]<sup>+</sup> 195.1385, found 195.1393.

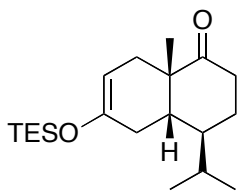

<sup>1</sup>H NMR (400 MHz, CDCl<sub>3</sub>) d 4.82-4.61 (m, 1H), 2.65 (ddd, *J* = 14.8, 13.7, 6.4 Hz, 1H), 2.48 (d, *J* = 17.1 Hz, 1H), 2.31 (ddd, *J* = 15.0, 4.5, 3.3 Hz, 1H), 2.19-2.08 (m, 2H), 2.01 (dtd, *J* = 13.8, 6.9, 3.4 Hz, 1H), 1.92 (ddt, *J* = 13.2, 6.5, 3.3 Hz, 1H), 1.79-1.66 (m, 2H), 1.61 (dd, *J* = 11.4, 4.2 Hz, 1H), 1.35 (ddd, *J* = 25.1, 13.4, 4.8 Hz, 1H), 1.13 (s, 4H), 0.97 (t, *J* = 7.9 Hz, 11H), 0.72 (d, *J* = 6.9 Hz, 3H), 0.66 (q, *J* = 7.9 Hz, 6H).  
; <sup>13</sup>C NMR (101 MHz, CDCl<sub>3</sub>) d 215.6, 147.7, 99.7, 46.9, 44.1, 39.1, 37.2, 31.5, 27.6, 27.4, 24.2, 21.5, 20.2, 14.5, 6.7, 5.0; IR (neat): cm<sup>-1</sup> 2954, 1707, 1674, 1183; HRMS (EI, *m/z*) calcd for C<sub>20</sub>H<sub>36</sub>O<sub>2</sub>Si [M]<sup>+</sup> 336.2485, found 336.2486.

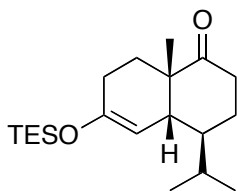

$^1\text{H}$  NMR (400 MHz,  $\text{CDCl}_3$ )  $\delta$  4.99 (d,  $J = 5.6$  Hz, 1H), 2.68-2.27 (m, 4H), 2.22-1.92 (m, 4H), 1.91-1.78 (m, 1H), 1.69 -1.50 (m, 1H), 1.36 (dt,  $J = 9.5, 6.3$  Hz, 1H), 1.12 (s, 3H), 1.04-0.90 (m, 11H), 0.79 (d,  $J = 6.9$  Hz, 3H), 0.67 (q,  $J = 7.9$  Hz, 6H);  $^{13}\text{C}$  NMR (101 MHz,  $\text{CDCl}_3$ )  $\delta$  216.7, 149.3, 105.5, 46.7, 46.6, 45.1, 37.9, 28.5, 27.2, 26.3, 23.4, 21.7, 20.0, 15.2, 6.6, 5.0; IR (neat):  $\text{cm}^{-1}$  2952, 1706, 1675, 1184; HRMS (EI,  $m/z$ ) calcd for  $\text{C}_{20}\text{H}_{36}\text{O}_2\text{Si}$   $[\text{M}]^+$  336.2485, found 336.2489.

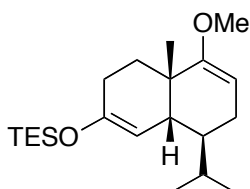

**Compound 50:** To a solution of diisopropylamine (84 mL, 0.62 mmol) in anhydrous THF (5 mL) at 0 °C was added n-BuLi (1M in hexane, 240 mL). The solution was stirred for 5 mins and cooled down to -78 °C. To this reaction mixture was injected a solution of compound 47 (40 mg, 0.12 mL) in anhydrous THF (1 mL). The reaction mixture was stirred at -78 °C for 40 mins and was then treated with HMPA (300 mL). 5 min later, dimethylsulfate (70 mL) was injected slowly into the reaction mixture. While stirring, the reaction mixture was slowly warmed up to 0 °C in 30 min, quenched with saturated  $\text{NH}_4\text{Cl}$  solution and extracted with ether. The combined organic solution was dried over  $\text{MgSO}_4$ , concentrated in vacuo and the residue was purified using flash chromatography. (33 mg, 80%)

$^1\text{H}$  NMR (400 MHz,  $\text{CDCl}_3$ )  $\delta$  4.92 (dd,  $J = 5.5, 1.4$  Hz, 1H), 4.55 (dd,  $J = 6.2, 1.9$  Hz, 1H), 3.46 (s, 3H), 2.15-1.97 (m, 2H), 1.95-1.87 (m, 2H), 1.85-1.73 (m, 3H), 1.69-1.58 (m, 1H), 1.49-1.29 (m, 1H), 1.08 (s, 3H), 1.04-0.94 (m, 9H), 0.91 (d,  $J = 7.0$  Hz, 3H), 0.79 (d,  $J = 6.9$  Hz, 3H), 0.67 (dt,  $J = 8.1, 6.8$  Hz, 6H);

$^{13}\text{C}$  NMR (101 MHz,  $\text{CDCl}_3$ )  $\delta$  161.4, 149.9, 105.2, 91.3, 54.2, 43.8, 43.1, 36.8, 28.9, 26.9, 22.0, 21.6, 14.9, 6.7, 5.1; IR (neat):  $\text{cm}^{-1}$  2956, 2926, 1670, 1199; HRMS (EI,  $m/z$ ) calcd for  $\text{C}_{21}\text{H}_{38}\text{O}_2\text{Si}$   $[\text{M}]^+$  350.2641, found 350.2632.

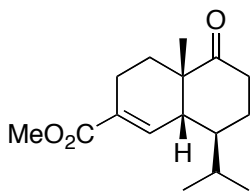

To a solution of compound **50** (33 mg, 0.09 mmol) in anhydrous THF (2 mL) at 0 °C was injected slowly *n*-BuLi (1M in hexane, 100 mL). The reaction mixture was stirred under argon for additional 30 mins and then treated with Comin's reagent (60 mg, 0.1 mmol). 2 hour later the reaction was quenched with water, extracted with ether and dried over MgSO<sub>4</sub>. After filtration, the solution was concentrated in vacuo. To the residue was added Pd(OAc)<sub>2</sub> (3.4 mg 0.015 mmol), PPh<sub>3</sub> (8 mg, 0.03 mmol), triethylamine (21 mL, 0.15 mmol), anhydrous DMF (1.5 mL) and anhydrous MeOH (0.5 mL). The reaction mixture was then degassed with CO and stirred for additional 12 h at room temperature under a balloon pressure of CO. The reaction was cooled down to 0 °C and 1N HCl solution (2 mL) and THF (1 mL) were added to the reaction mixture. The mixture was then stirred at 0 °C for 6 hour, extracted with ether and dried over MgSO<sub>4</sub>. The solution was concentrated in vacuo and the residue was purified using flash chromatography. (16 mg, 65% yield)

<sup>1</sup>H NMR (400 MHz, CDCl<sub>3</sub>) δ 7.08 (dd, *J* = 3.5, 1.8 Hz, 1H), 3.76 (s, 3H), 2.53-2.38 (m, 2H), 2.33-2.13 (m, 1H), 2.11-1.87 (m, 3H), 1.54 (m, 5H), 1.04 (s, 3H), 0.98 (d, *J* = 6.9 Hz, 3H), 0.89 (d, *J* = 6.9 Hz, 3H).

; <sup>13</sup>C NMR (101 MHz, CDCl<sub>3</sub>) δ 215.6, 140.4, 128.8, 51.7, 46.2, 45.9, 37.8, 29.7, 27.7, 27.5, 23.7, 21.6, 21.2, 20.2, 15.6; IR (neat): cm<sup>-1</sup> 2922, 1711, 1650, 1259; HRMS (EI, *m/z*) calcd for C<sub>16</sub>H<sub>25</sub>O<sub>3</sub> [M+H]<sup>+</sup> 265.1804, found 265.1815.

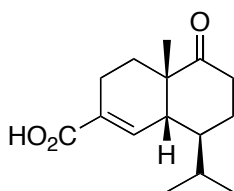

To a solution of compound **53** (16 mg, 0.06 mmol) in 1 mL of THF was added 1 ml of LiOH aqueous solution (0.2 M). The reaction mixture was stirred at room temperature for

12 h and extracted with ethyl acetate. The combined solution was dried over MgSO<sub>4</sub> and concentrated in vacuo. The residue was purified using flash chromatography. (14.3 mg, 90%)

<sup>1</sup>H NMR (400 MHz, CDCl<sub>3</sub>) δ 7.20 (d, *J* = 5.3 Hz, 1H), 2.58-2.36 (m, 2H), 2.22 (dd, *J* = 10.1, 6.5 Hz, 1H), 2.12-1.87 (m, 3H), 1.78-1.38 (m, 5H), 1.05 (s, 3H), 0.99 (d, *J* = 6.9 Hz, 3H), 0.90 (d, *J* = 6.9 Hz, 3H); <sup>13</sup>C NMR (101 MHz, CDCl<sub>3</sub>) δ 215.4, 169.9, 142.9, 128.0, 46.2, 46.1, 46.0, 37.8, 27.6, 27.5, 23.7, 21.5, 20.9, 20.3, 15.6; IR (neat): cm<sup>-1</sup> 2925, 1708, 1692, 1650, 1275; HRMS (EI, *m/z*) calcd for C<sub>15</sub>H<sub>23</sub>O<sub>3</sub> [M+H]<sup>+</sup> 251.1647, found 251.1644.

<sup>13</sup>C comparison:

| Isolated cosmosoic acid | Synthetic cosmosoic acid |
|-------------------------|--------------------------|
| 212.2                   | 215.4                    |
| 171.0                   | 169.9                    |
| 151.4                   | 142.9                    |
| 132.9                   | 128.0                    |
| 59.4                    | 46.2                     |
| 55.8                    | 46.1                     |
| 52.8                    | 46.0                     |
| 39.4                    | 37.8                     |
| 34.9                    | 27.6                     |
| 32.8                    | 27.5                     |
| 27.0                    | 23.7                     |
| 25.0                    | 21.5                     |
| 22.6                    | 20.9                     |
| 21.9                    | 20.3                     |
| 19.8                    | 15.6                     |

proton 400Mhz

|       |       |
|-------|-------|
| 1.838 | 3.333 |
| 1.840 | 3.319 |
| 2.484 | 3.306 |
| 2.490 | 3.300 |
| 2.497 | 3.287 |
| 2.503 | 3.273 |
| 2.509 | 3.261 |
| 2.516 | 3.242 |
| 2.523 | 3.235 |
| 2.529 | 3.216 |
| 2.536 | 3.206 |
| 2.545 | 3.199 |
| 2.559 | 3.183 |
| 2.568 | 3.171 |
| 2.571 | 3.159 |
| 2.583 | 3.147 |
| 2.605 | 3.135 |
| 2.616 | 3.123 |
| 2.623 | 3.111 |
| 2.657 | 3.099 |
| 2.691 | 3.087 |
| 2.694 | 3.075 |
| 2.702 | 3.063 |
| 2.705 | 3.051 |
| 2.732 | 3.039 |
| 2.735 | 3.027 |
| 2.742 | 3.015 |
| 2.745 | 3.003 |
| 3.261 | 2.991 |
| 3.273 | 2.979 |
| 3.287 | 2.967 |
| 3.300 | 2.955 |
| 3.306 | 2.943 |
| 3.319 | 2.931 |
| 3.333 | 2.919 |

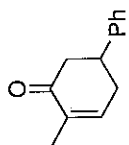

|       |       |
|-------|-------|
| 6.766 | 7.344 |
| 6.769 | 7.340 |
| 6.773 | 7.324 |
| 6.776 | 7.313 |
| 6.780 | 7.306 |
| 6.783 | 7.294 |
| 7.216 | 7.248 |
| 7.236 | 7.248 |
| 7.248 | 7.248 |
| 7.306 | 7.248 |
| 7.313 | 7.248 |
| 7.324 | 7.248 |
| 7.340 | 7.248 |
| 7.344 | 7.248 |

MD-VIII-275-2  
CDCl3  
100 Mhz

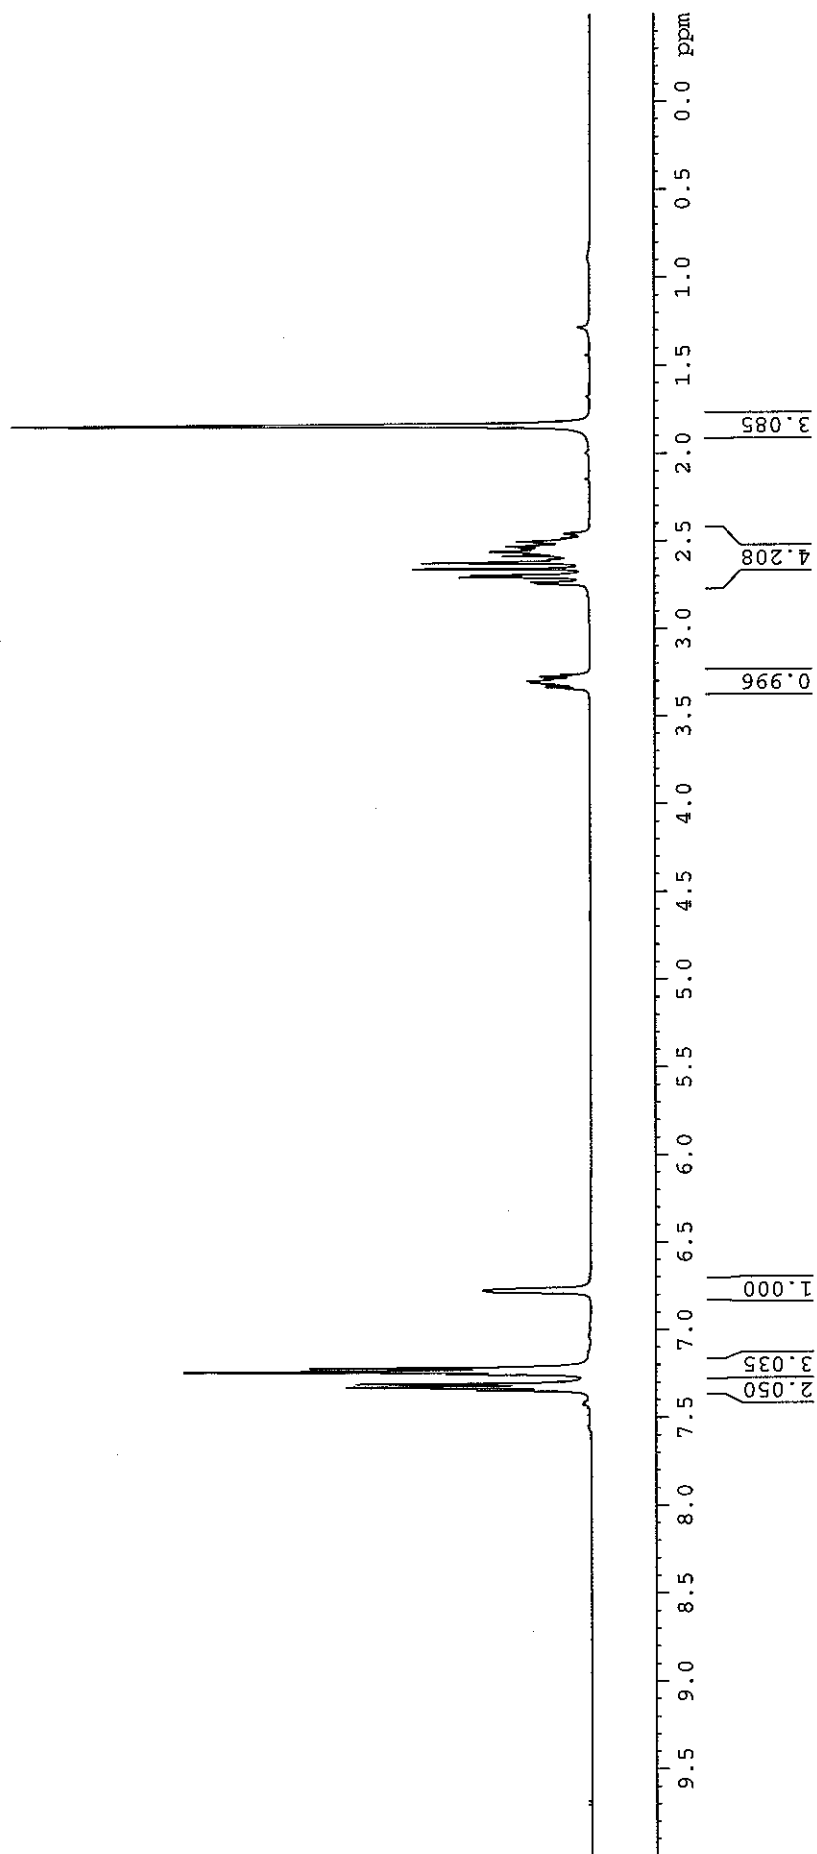

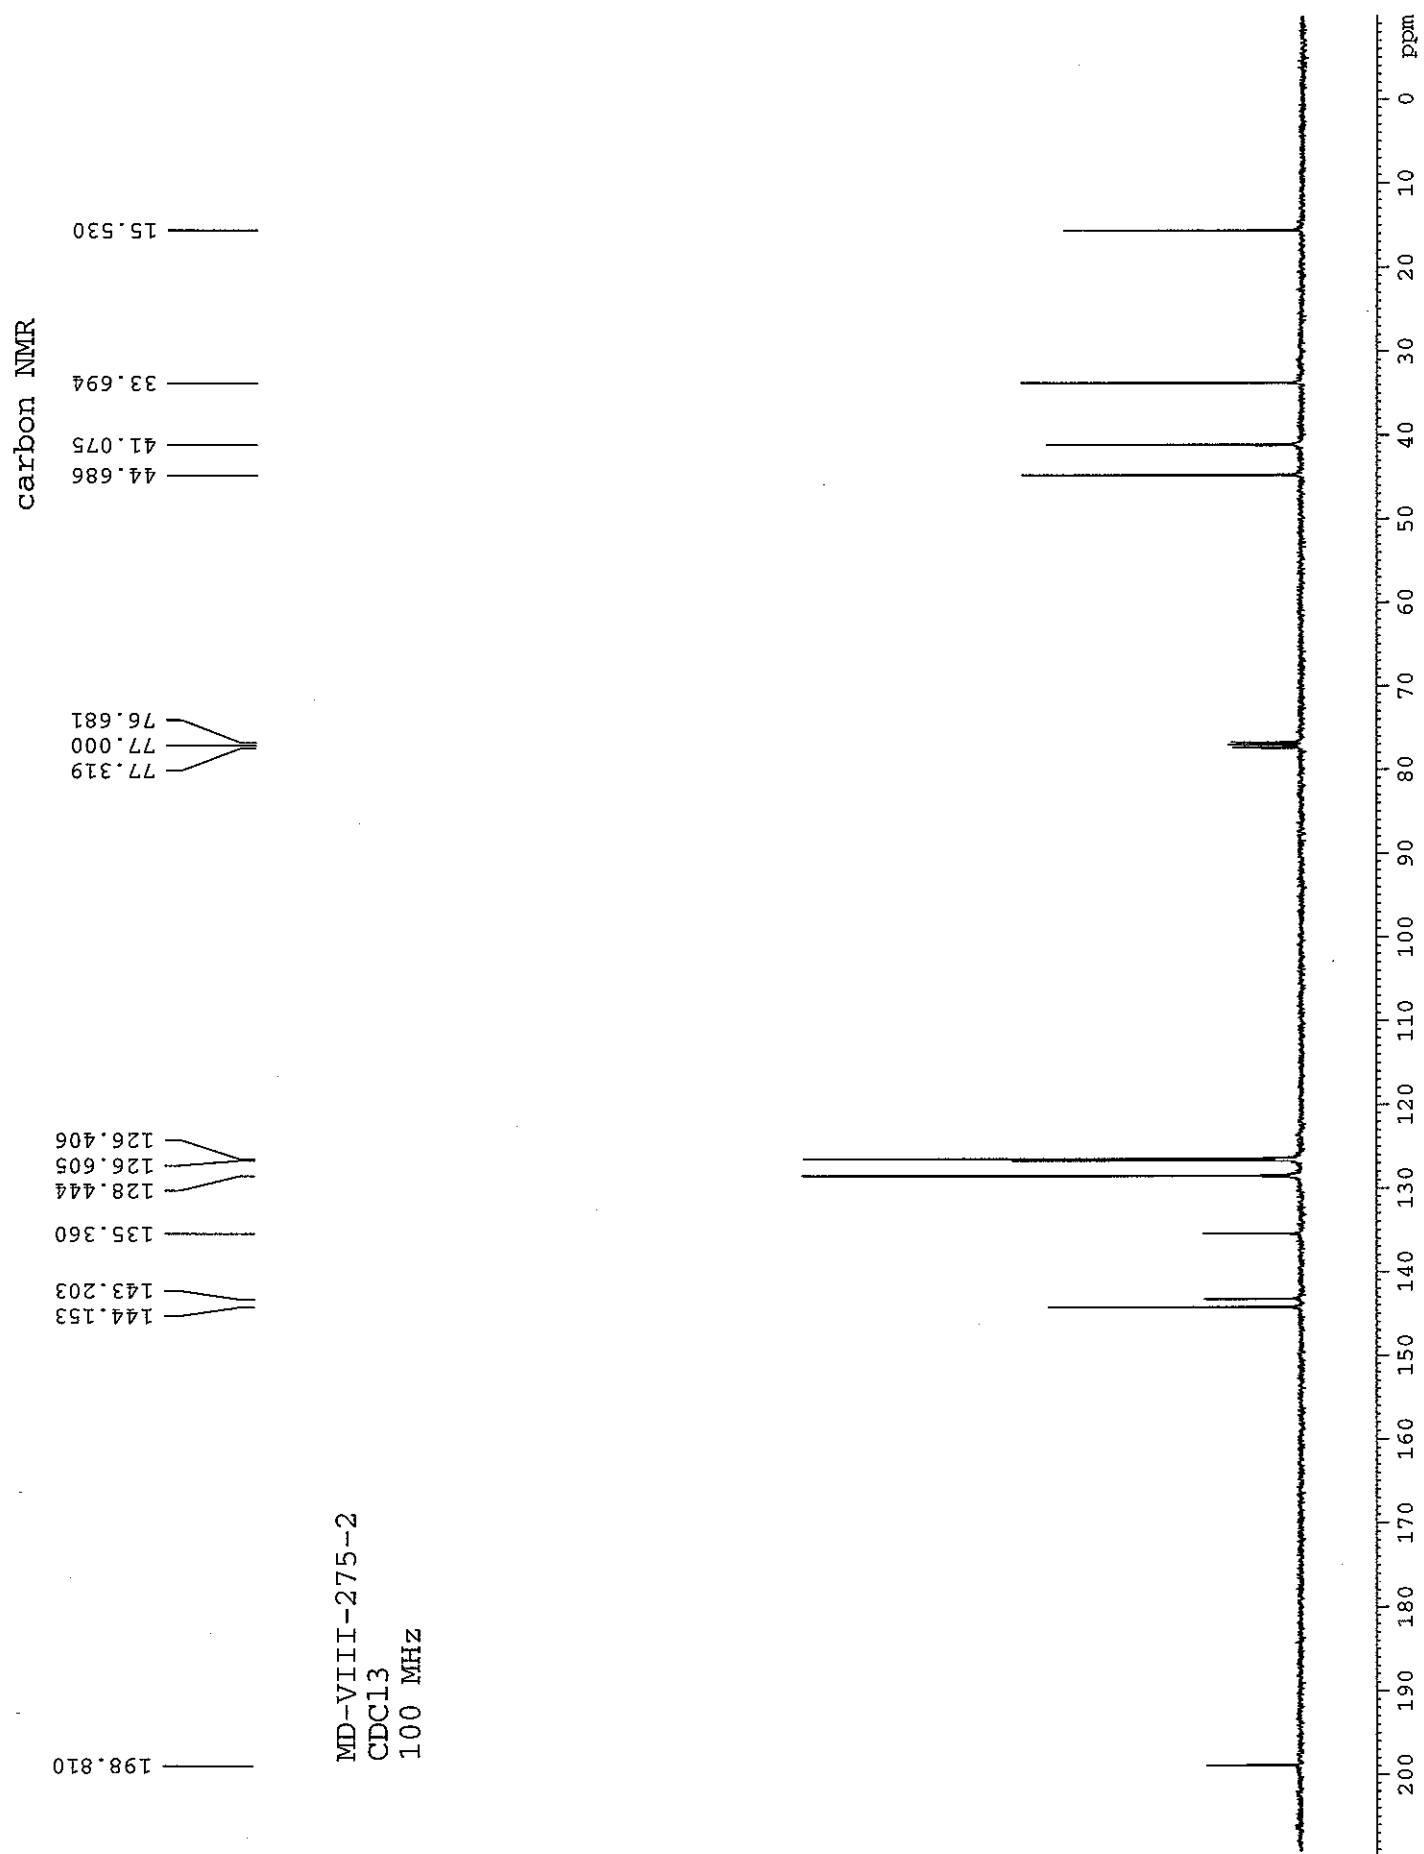



proton

Current Data Parameters  
NAME PFD-III-109  
EXPNO 1  
PROCNO 1

F2 - Acquisition Parameters  
Date\_ 20101210  
Time 10.38  
INSTRUM spect  
PROBHD 5 mm PABBO BB-  
PULPROG zg30  
TD 32768  
SOLVENT CDCl3  
NS 22  
DS 0  
SWH 6009.615 Hz  
FIDRES 0.183399 Hz  
AQ 2.7263477 sec  
RG 32  
DW 83.200 usec  
DE 6.50 usec  
TE 298.3 K  
D1 1.00000000 sec  
TD0 1

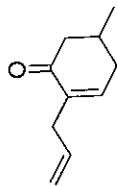

==== CHANNEL f1 =====  
NUC1 1H  
P1 9.50 usec  
PL1 -4.00 dB  
PL1W 26.94187927 W  
SF01 400.1328009 MHz

F2 - Processing parameters  
SI 32768  
SF 400.1300087 MHz  
WDW EM  
SSB 0  
LB 0.20 Hz  
GB 0  
PC 1.40

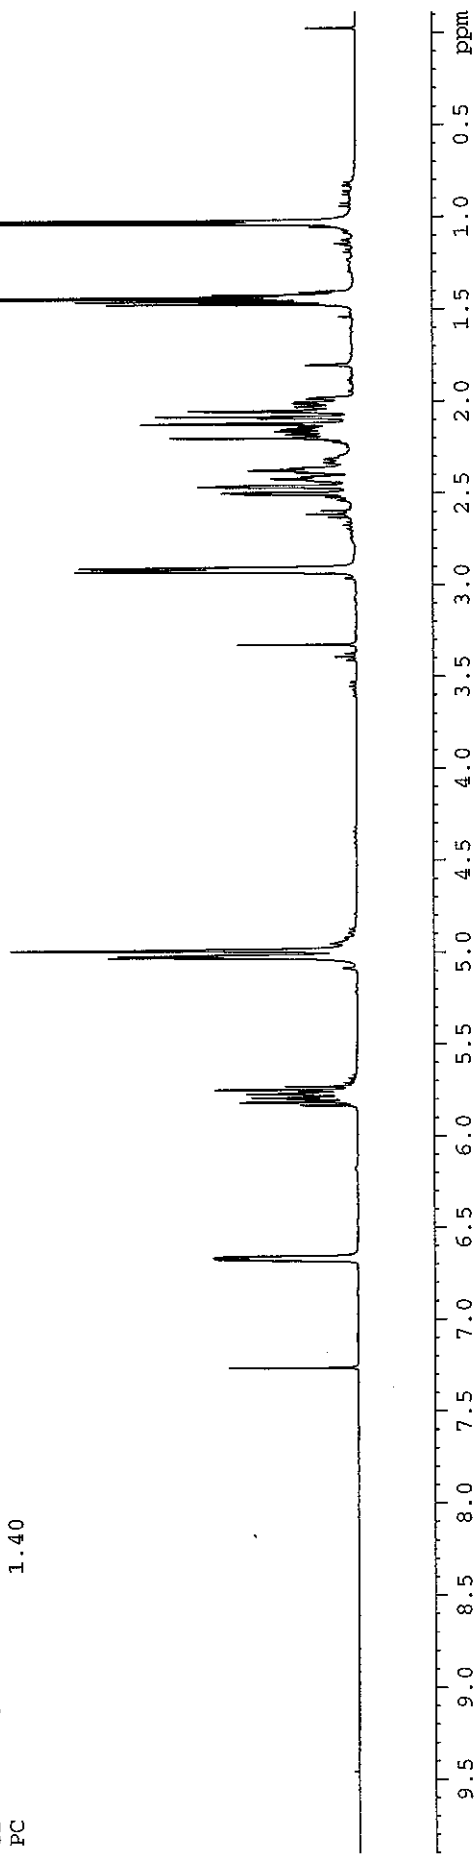

```

Current Data Parameters
NAME      PFD-III-109
EXPNO    2
PROCNO   1
F2 - Acquisition Parameters
Date_    20101210
Time     10.44
INSTRUM  spect
PROBHD   5 mm PABBO BB-
PULPROG  zgpg30
TD       32768
SOLVENT  CDCl3
NS       245
DS       0
SWH      28409.092 Hz
FIDRES   0.866977 Hz
AQ       0.5767668 sec
RG       1820
DW       17.600 usec
DE       6.50 usec
TE       298.3 K
D1       0.699999999 sec
D11      0.030000000 sec
TDO      1
    
```

```

===== CHANNEL f1 =====
NUC1     13C
P1       8.50 usec
PL1      3.20 dB
PL1W     49.53329468 W
SFO1     100.6228298 MHz

===== CHANNEL f2 =====
CPDPRG2  waltz16
NUC2     1H
PCPD2    80.00 usec
PL2      -4.00 dB
PL12     14.60 dB
PL13     14.60 dB
PL2W     26.94187927 W
PL12W    0.37190142 W
PL13W    0.37190142 W
SFO2     400.1316005 MHz
    
```

```

F2 - Processing parameters
SI       32768
SF       100.6127743 MHz
WDW      EM
SSB      0
LB       1.00 Hz
GB       0
PC       1.40
    
```

```

144.957
137.682
135.804
116.127
77.320
77.002
76.685
46.495
34.228
33.224
30.561
27.839
21.124
    
```

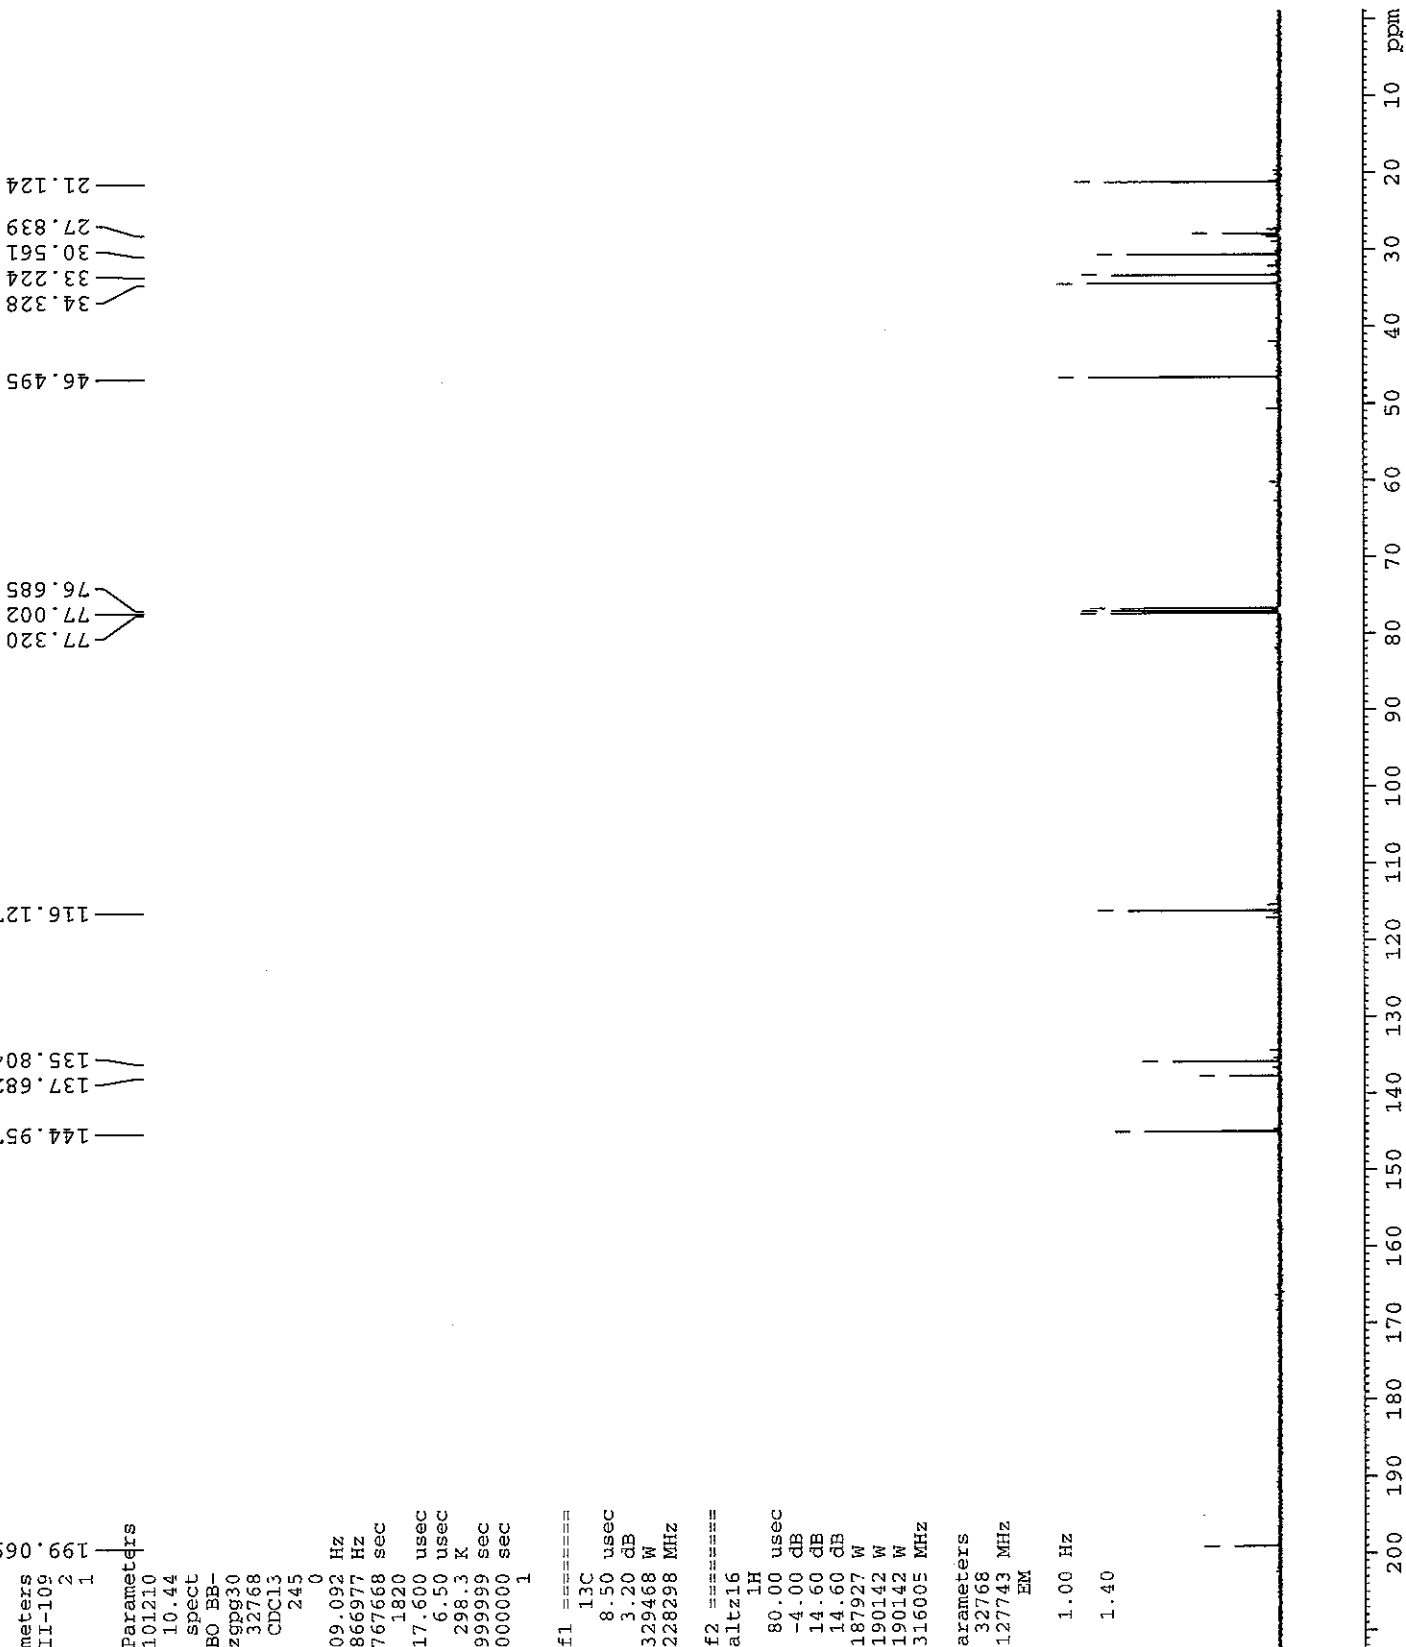

NAME PFD-III-104  
EXPNO 1  
PROCNO 1  
Date\_ 20101206  
Time\_ 21.29  
INSTRUM spect  
PROBHD 5 mm PABBO BB-  
PULPROG zg30  
TD 32768  
SOLVENT CDCl3  
NS 32  
DS 0  
SWH 6009.615 Hz  
FIDRES 0.183399 Hz  
AQ 2.7263477 sec  
RG 32  
DW 83.200 usec  
DE 6.50 usec  
TE 298.3 K  
D1 1.00000000 sec  
TD0 1

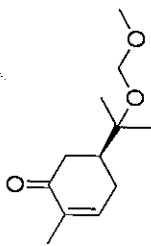

===== CHANNEL f1 =====  
NUC1 1H  
P1 9.50 usec  
PL1 -4.00 dB  
PL1W 26.94187927 W  
SF01 400.1328009 MHz  
SI 32768  
SF 400.1300088 MHz  
WDW EM  
SSB 0  
LB 0.20 Hz  
GB 0  
PC 1.40

proton

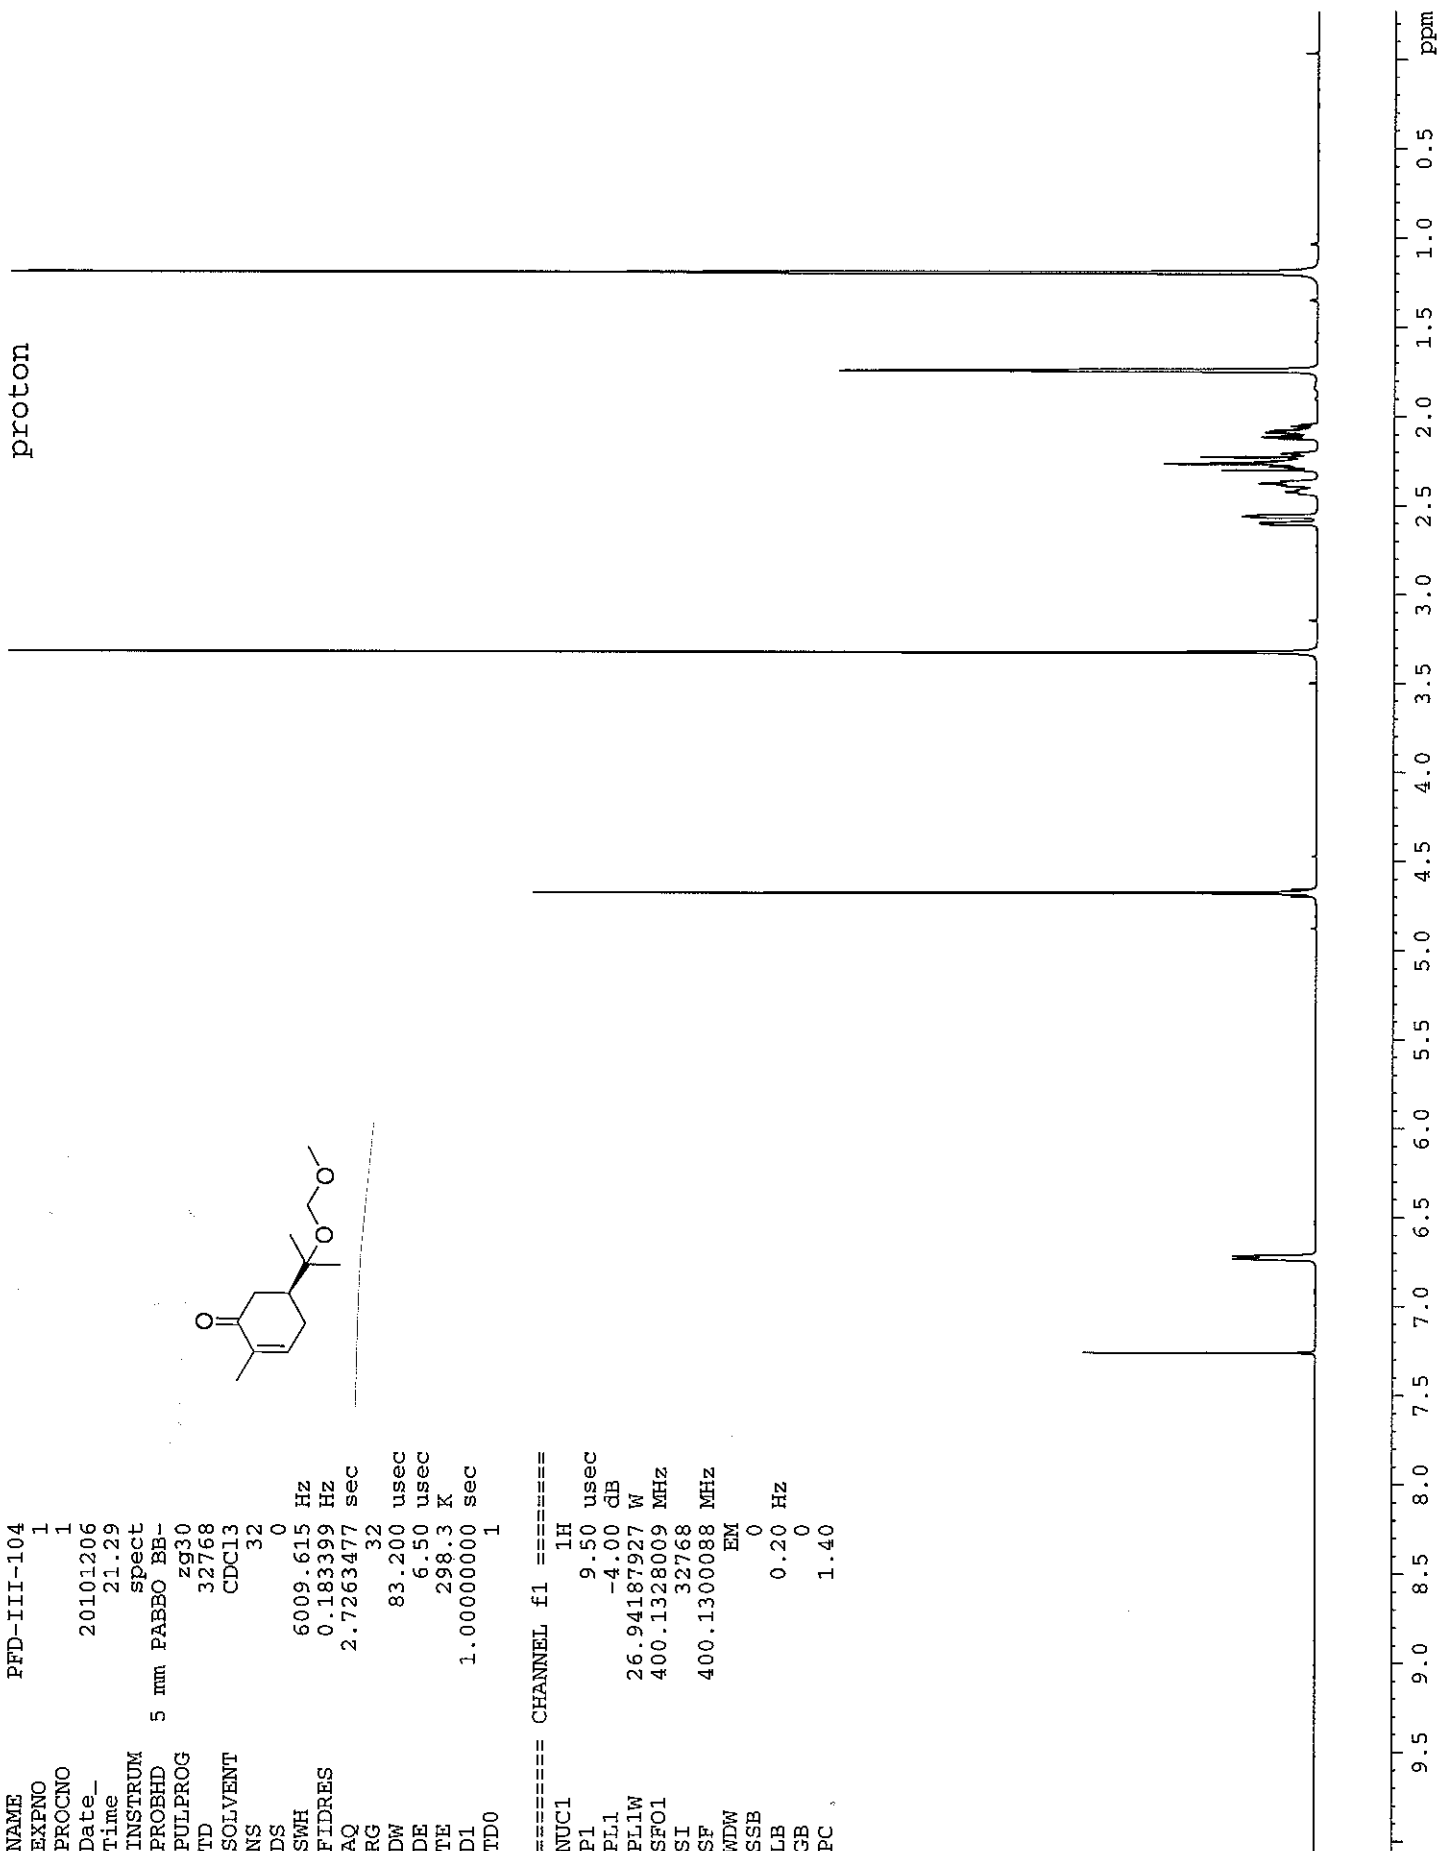

```

NAME          PFD-III-104
EXPNO         2
PROCNO        1
Date_         20101206
Time_        21.35
INSTRUM       spect
PROBHD        5 mm PABBO BB-
PULPROG       zgpg30
TD            32768
SOLVENT       CDCl3
NS            116
DS            0
SWH           28409.092 Hz
FIDRES       0.866977 Hz
AQ            0.5767668 sec
RG            1820
DW            17.600 usec
DE            6.50 usec
TE            299.7 K
D1            0.69999999 sec
D11           0.03000000 sec
TD0           1
    
```

```

===== CHANNEL f1 =====
NUC1          13C
P1            8.50 usec
PL1           3.20 dB
PL1W          49.53329468 W
SFO1          100.6228298 MHz
    
```

```

===== CHANNEL f2 =====
CPDPRG2      waltz16
NUC2          1H
PCPD2        80.00 usec
PL2           -4.00 dB
PL12         14.60 dB
PL13         14.60 dB
PL2W         26.94187927 W
PL12W        0.37190142 W
PL13W        0.37190142 W
SFO2         400.1316005 MHz
SI           32768
SF           100.6127743 MHz
WDW          EM
SSB          0
LB           1.00 Hz
GB           0
PC           1.40
    
```

```

145.021
135.073
90.823
77.316
76.998
76.680
76.483
55.151
45.684
39.407
27.085
23.640
23.549
15.503
    
```

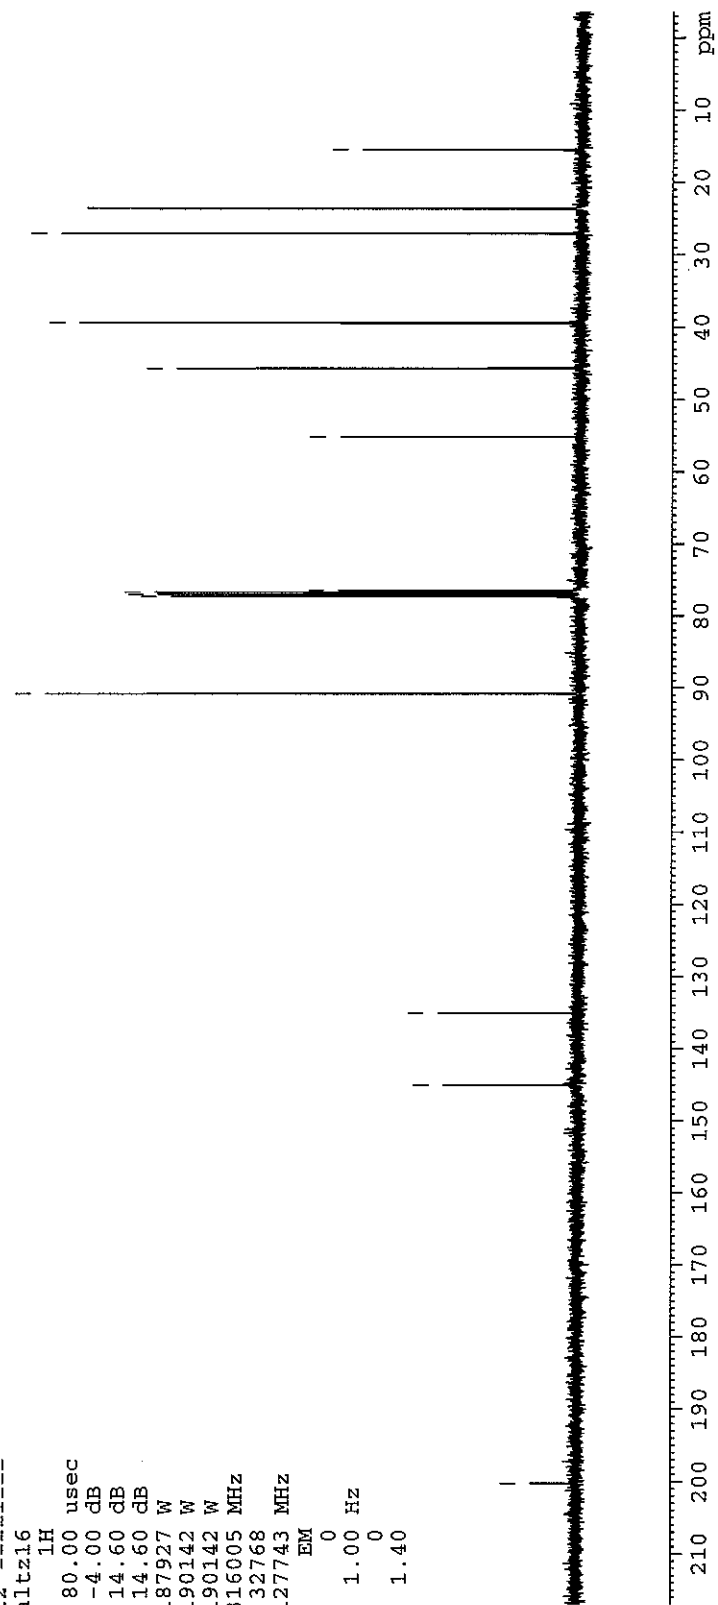

NAME PFD-III-161-R2  
EXPNO 1  
PROCNO 1  
Date\_ 20110720  
Time 16.28  
INSTRUM spect  
PROBHD 5 mm PABBI 1H/  
PULPROG zg30  
TD 32768  
SOLVENT CDCl3  
NS 15  
DS 0  
SWH 6009.615 Hz  
FIDRES 0.183399 Hz  
AQ 2.7263477 sec  
RG 90.5  
DW 83.200 usec  
DE 6.50 usec  
TE 294.4 K  
D1 1.00000000 sec  
TD0 1

==== CHANNEL f1 =====  
NUC1 1H  
P1 7.25 usec  
PL1 0.00 dB  
PL1W 12.20776844 W  
SF01 399.9225995 MHz  
SI 32768  
SF 399.9200099 MHz  
EM  
SSB 0  
LB 0.20 Hz  
GB 0  
PC 1.00

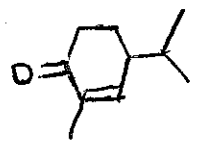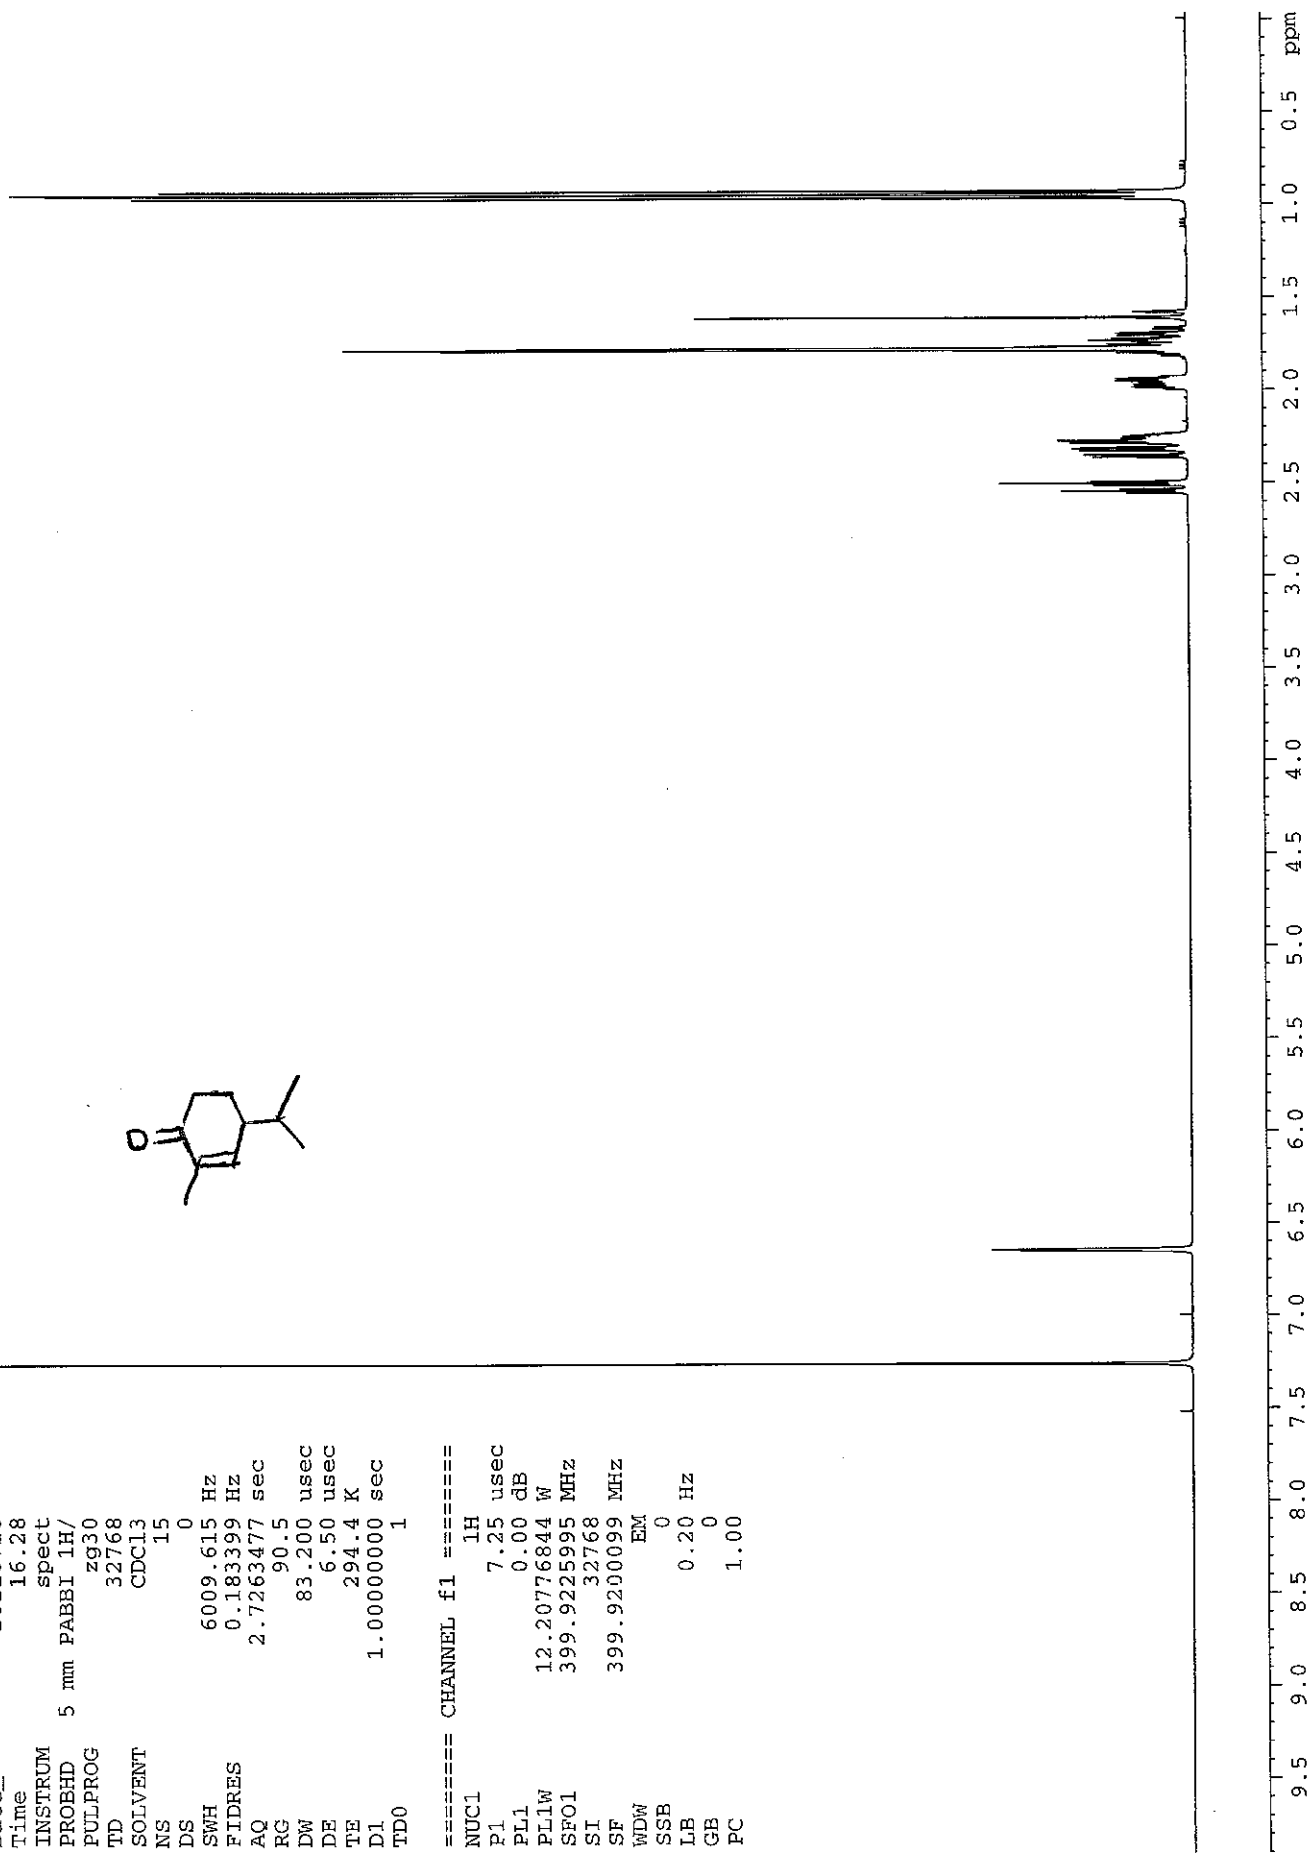

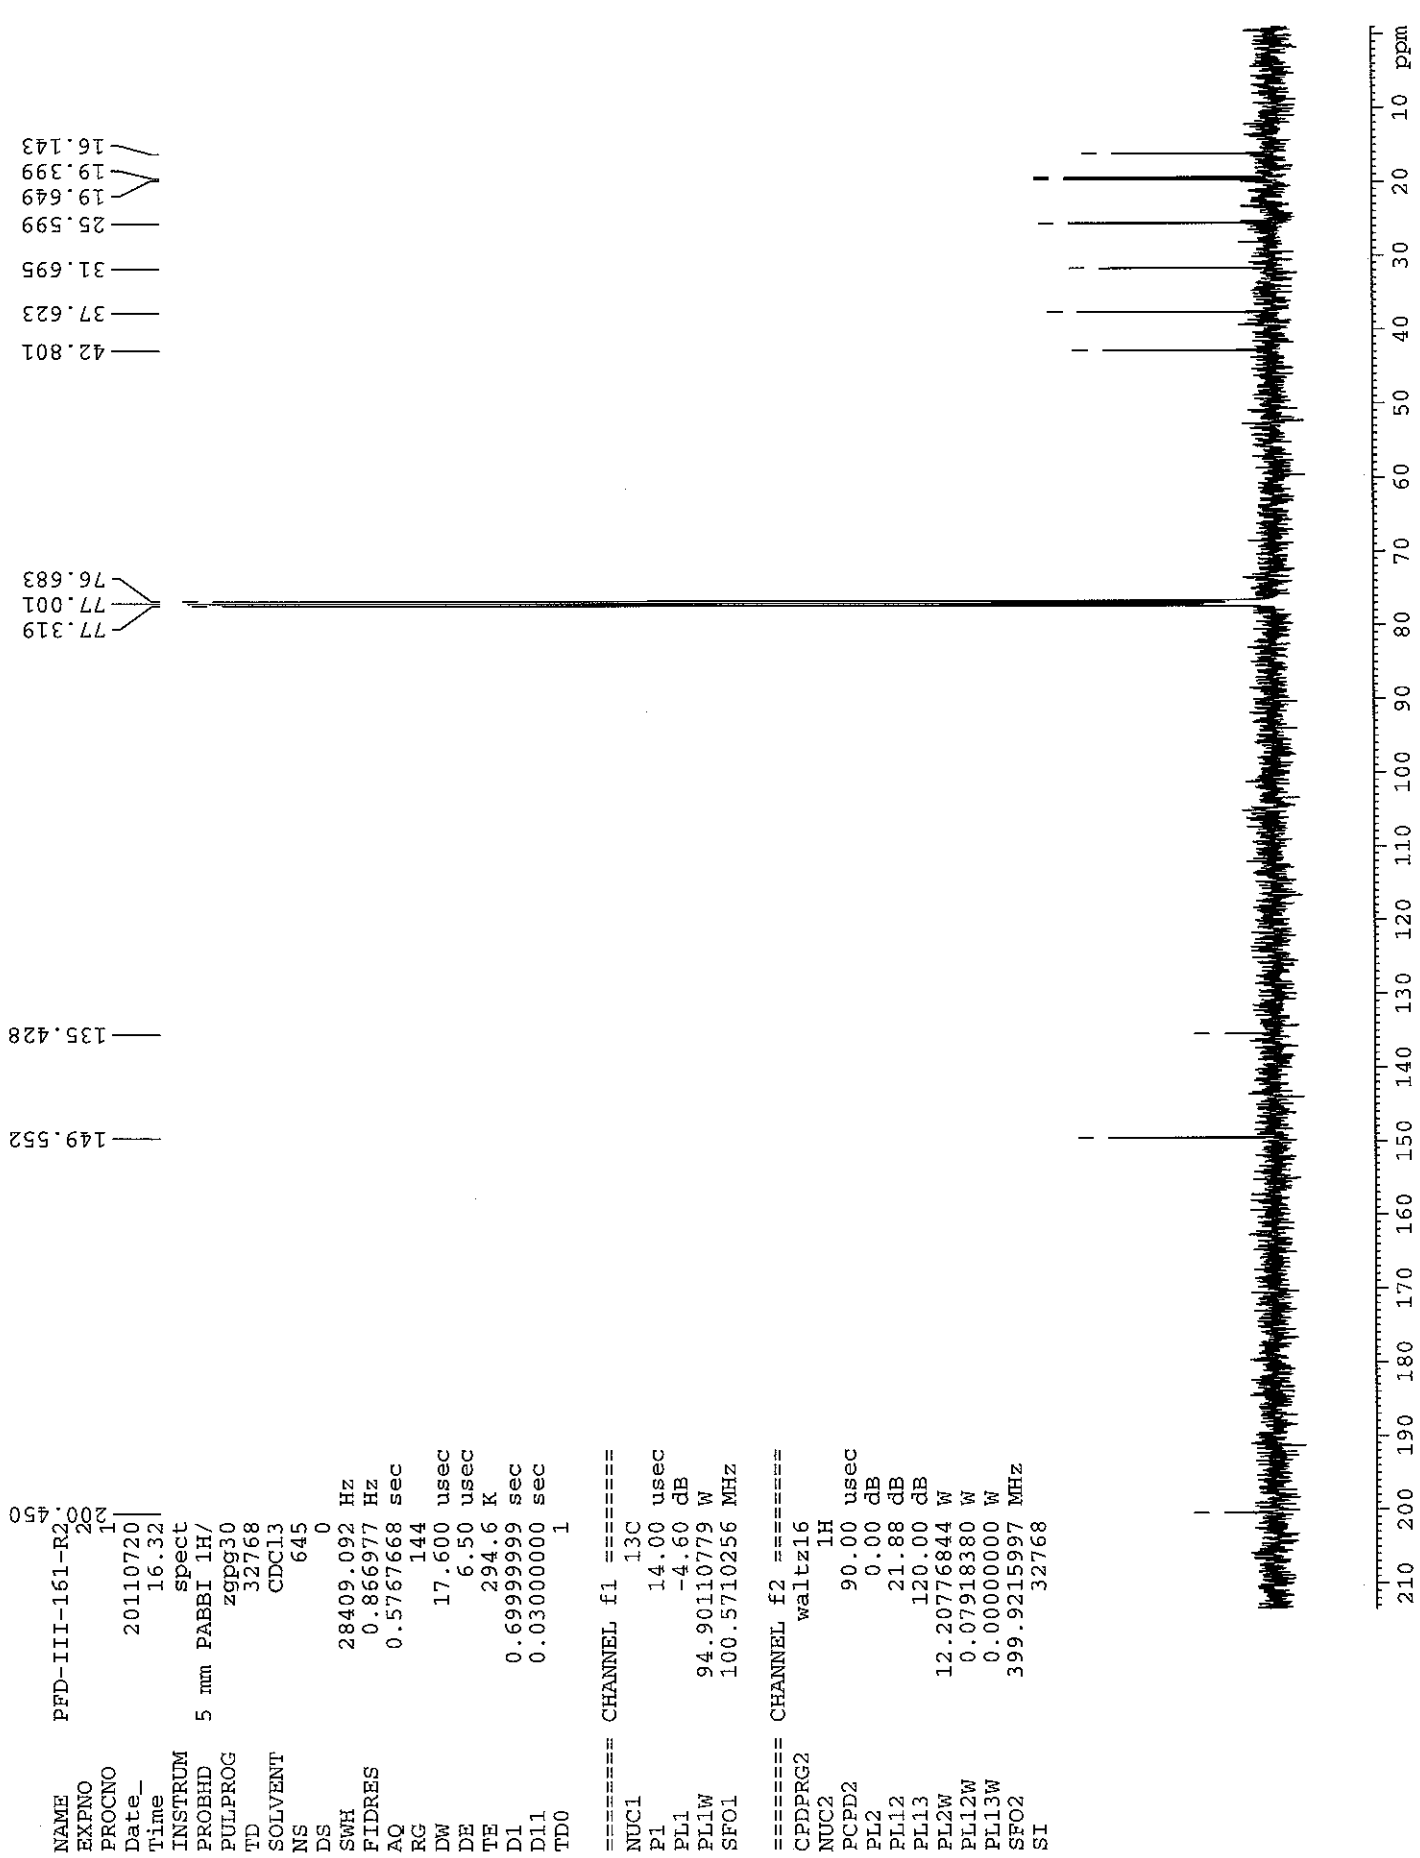

```

NAME PFD-III-161-R2
EXPNO 20
PROCNO 1
Date_ 20110720
Time 16.32
INSTRUM spect
PROBHD 5 mm PABBI 1H/
PULPROG zgpg30
TD 32768
SOLVENT CDCl3
NS 645
DS 0
SWH 28409.092 Hz
FIDRES 0.866977 Hz
AQ 0.5767668 sec
RG 144
DE 17.600 usec
TE 294.6 K
D1 0.69999999 sec
D11 0.03000000 sec
TD0 1
    
```

```

===== CHANNEL f1 =====
NUC1 13C
P1 14.00 usec
PL1 -4.60 dB
PL1W 94.90110779 W
SFO1 100.5710256 MHz
    
```

```

===== CHANNEL f2 =====
CPDPRG2 waltz16
NUC2 1H
PCPD2 90.00 usec
PL2 0.00 dB
PL12 21.88 dB
PL13 120.00 dB
PL2W 12.20776844 W
PL12W 0.07918380 W
PL13W 0.00000000 W
SFO2 399.9215997 MHz
SI 32768
    
```

NAME PFD-III-37  
EXPNO 1  
PROCNO 1  
Date\_ 20090307  
Time 20.49  
INSTRUM spect  
PROBHD 5 mm TXI 13C Z  
PULPROG zg  
TD 32768  
SOLVENT CDCl3  
NS 32  
DS 0  
SWH 6009.615 Hz  
FIDRES 0.183399 Hz  
AQ 2.7263477 sec  
RG 16  
DW 83.200 usec  
DE 5.50 usec  
TE 300.0 K  
D1 2.00000000 sec  
TD0 1

==== CHANNEL f1 =====  
NUC1 1H  
P1 3.00 usec  
PL1 3.00 dB  
SFO1 500.1325006 MHz  
SI 16384  
SF 500.1300126 MHz  
WDW EM  
SSB 0  
LB 0.20 Hz  
GB 0  
PC 1.00

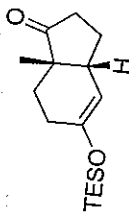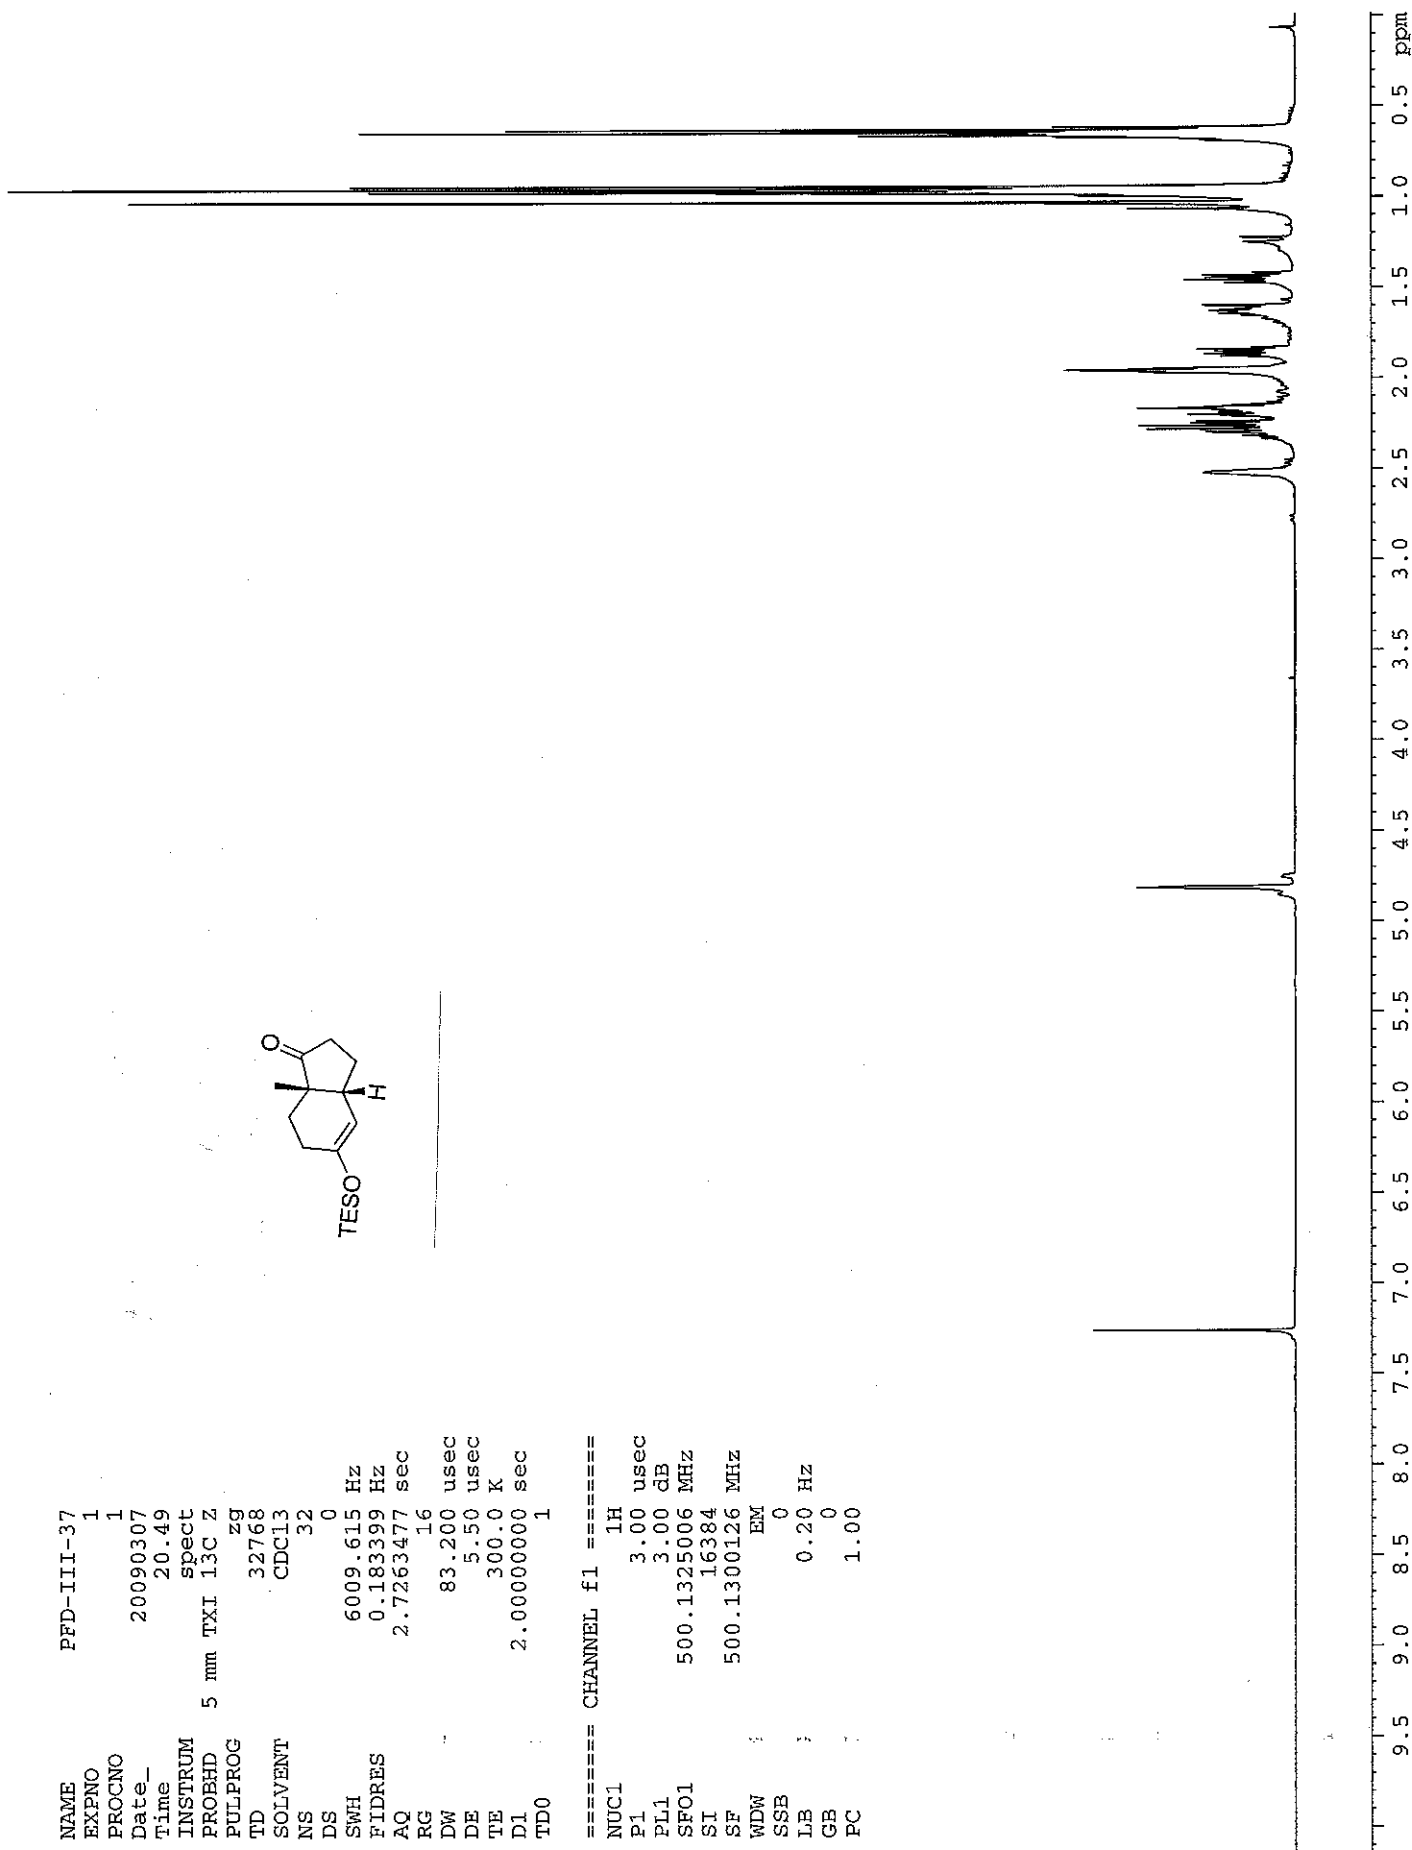

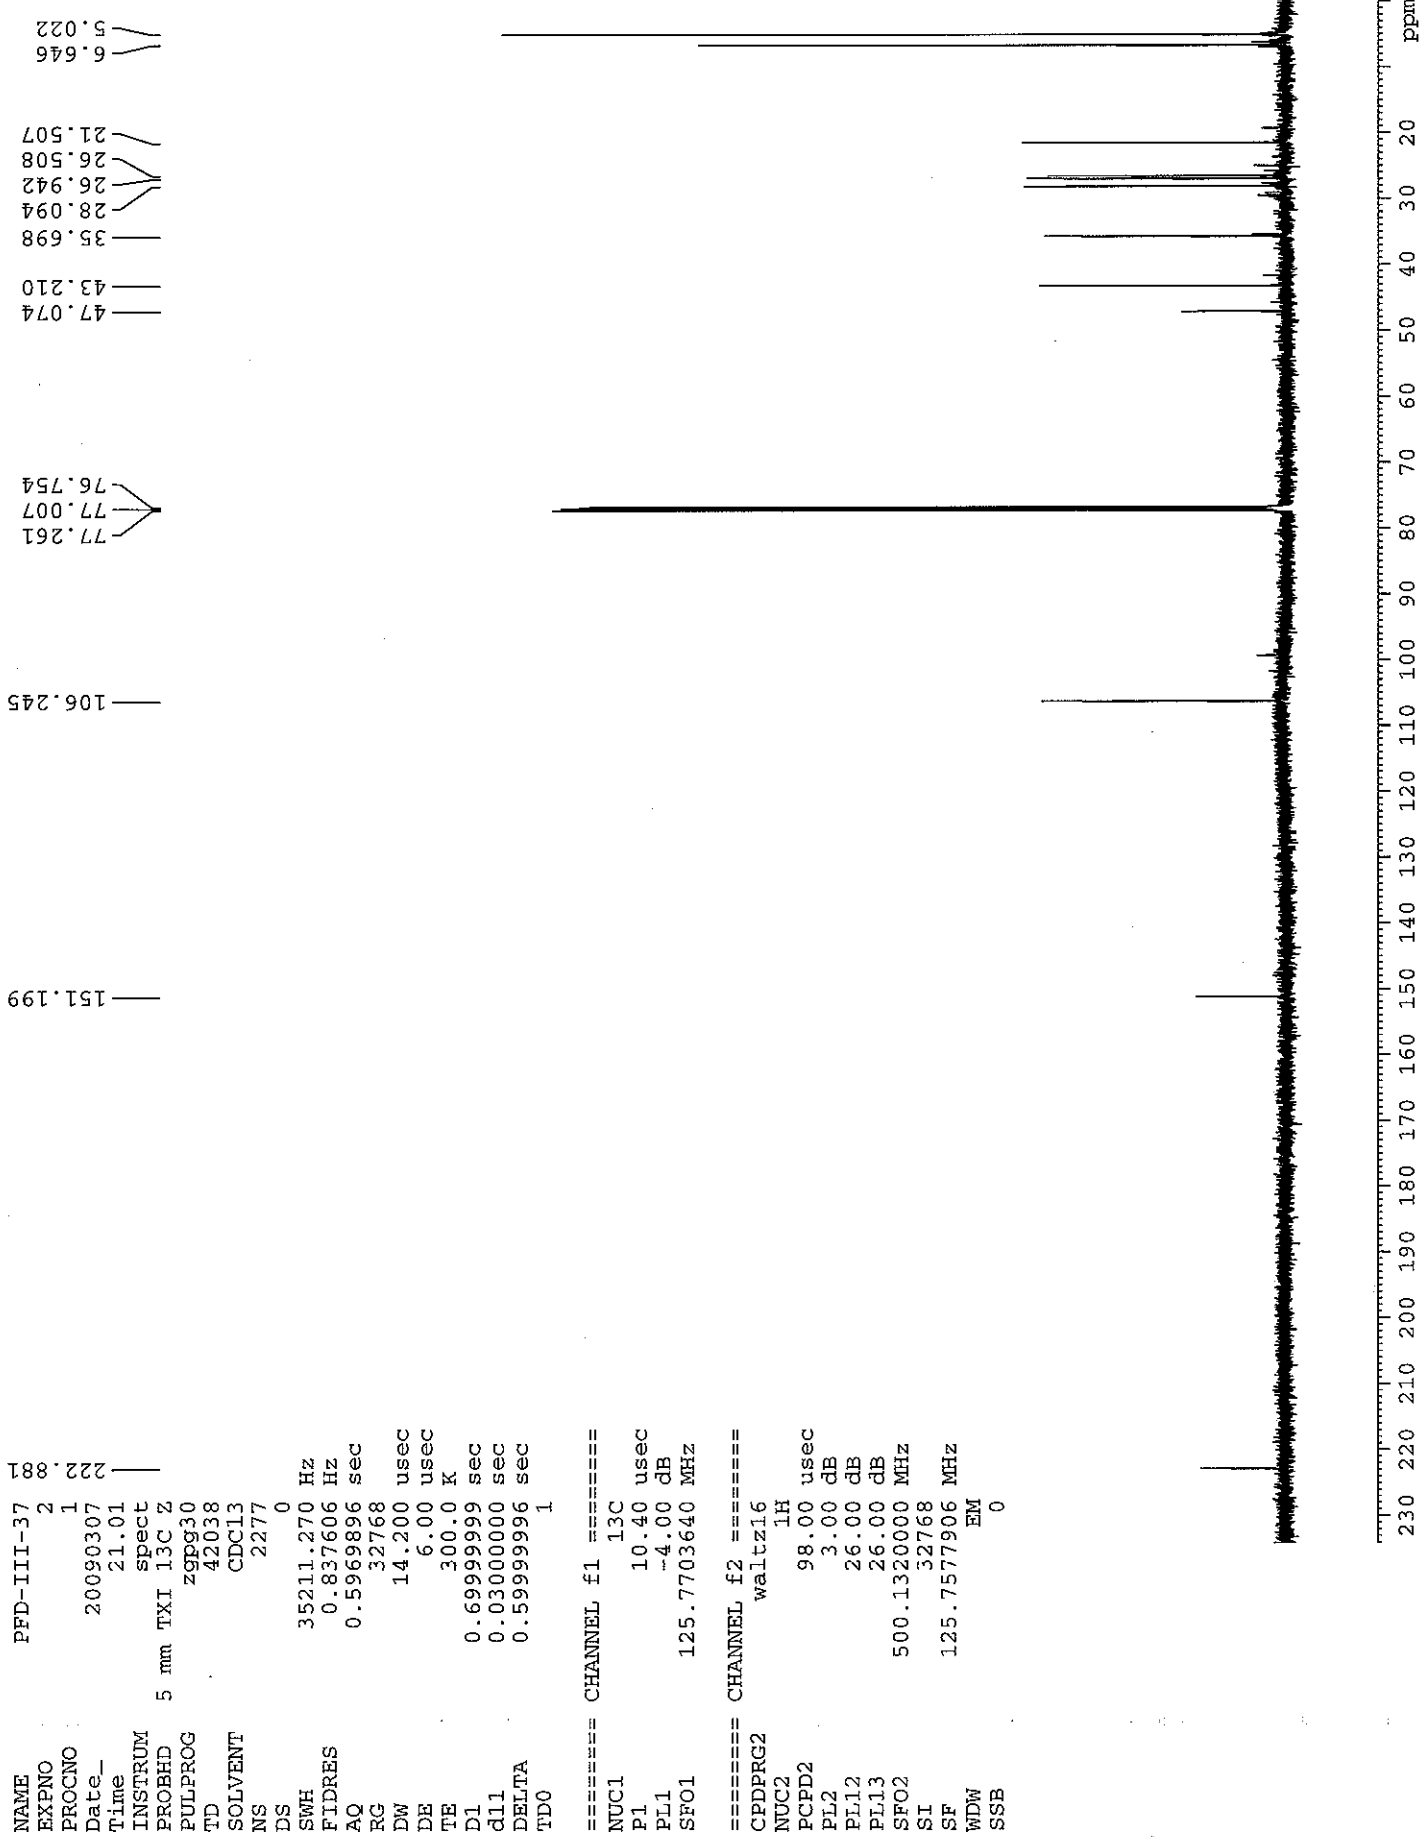



NAME PFD-III-50  
EXPNO 1  
PROCNO 1  
Date\_ 20090921  
Time 22.49  
INSTRUM spect  
PROBHD 5 mm Multinucl  
PULPROG zg  
TD 32768  
SOLVENT D2O  
NS 32  
DS 0  
SWH 5995.204 Hz  
FIDRES 0.182959 Hz  
AQ 2.7329011 sec  
RG 10.1  
DW 83.400 usec  
DE 6.00 usec  
TE 299.9 K  
D1 1.00000000 sec  
TD0 1

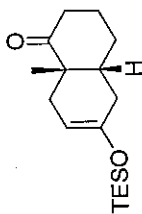

==== CHANNEL f1 =====  
NUC1 1H  
P1 2.50 usec  
PL1 0.00 dB  
SFO1 399.9225995 MHz  
SI 32768  
SF 399.9200109 MHz  
WDW EM  
SSB 0  
LB 0.20 Hz  
GB 0  
PC 1.00

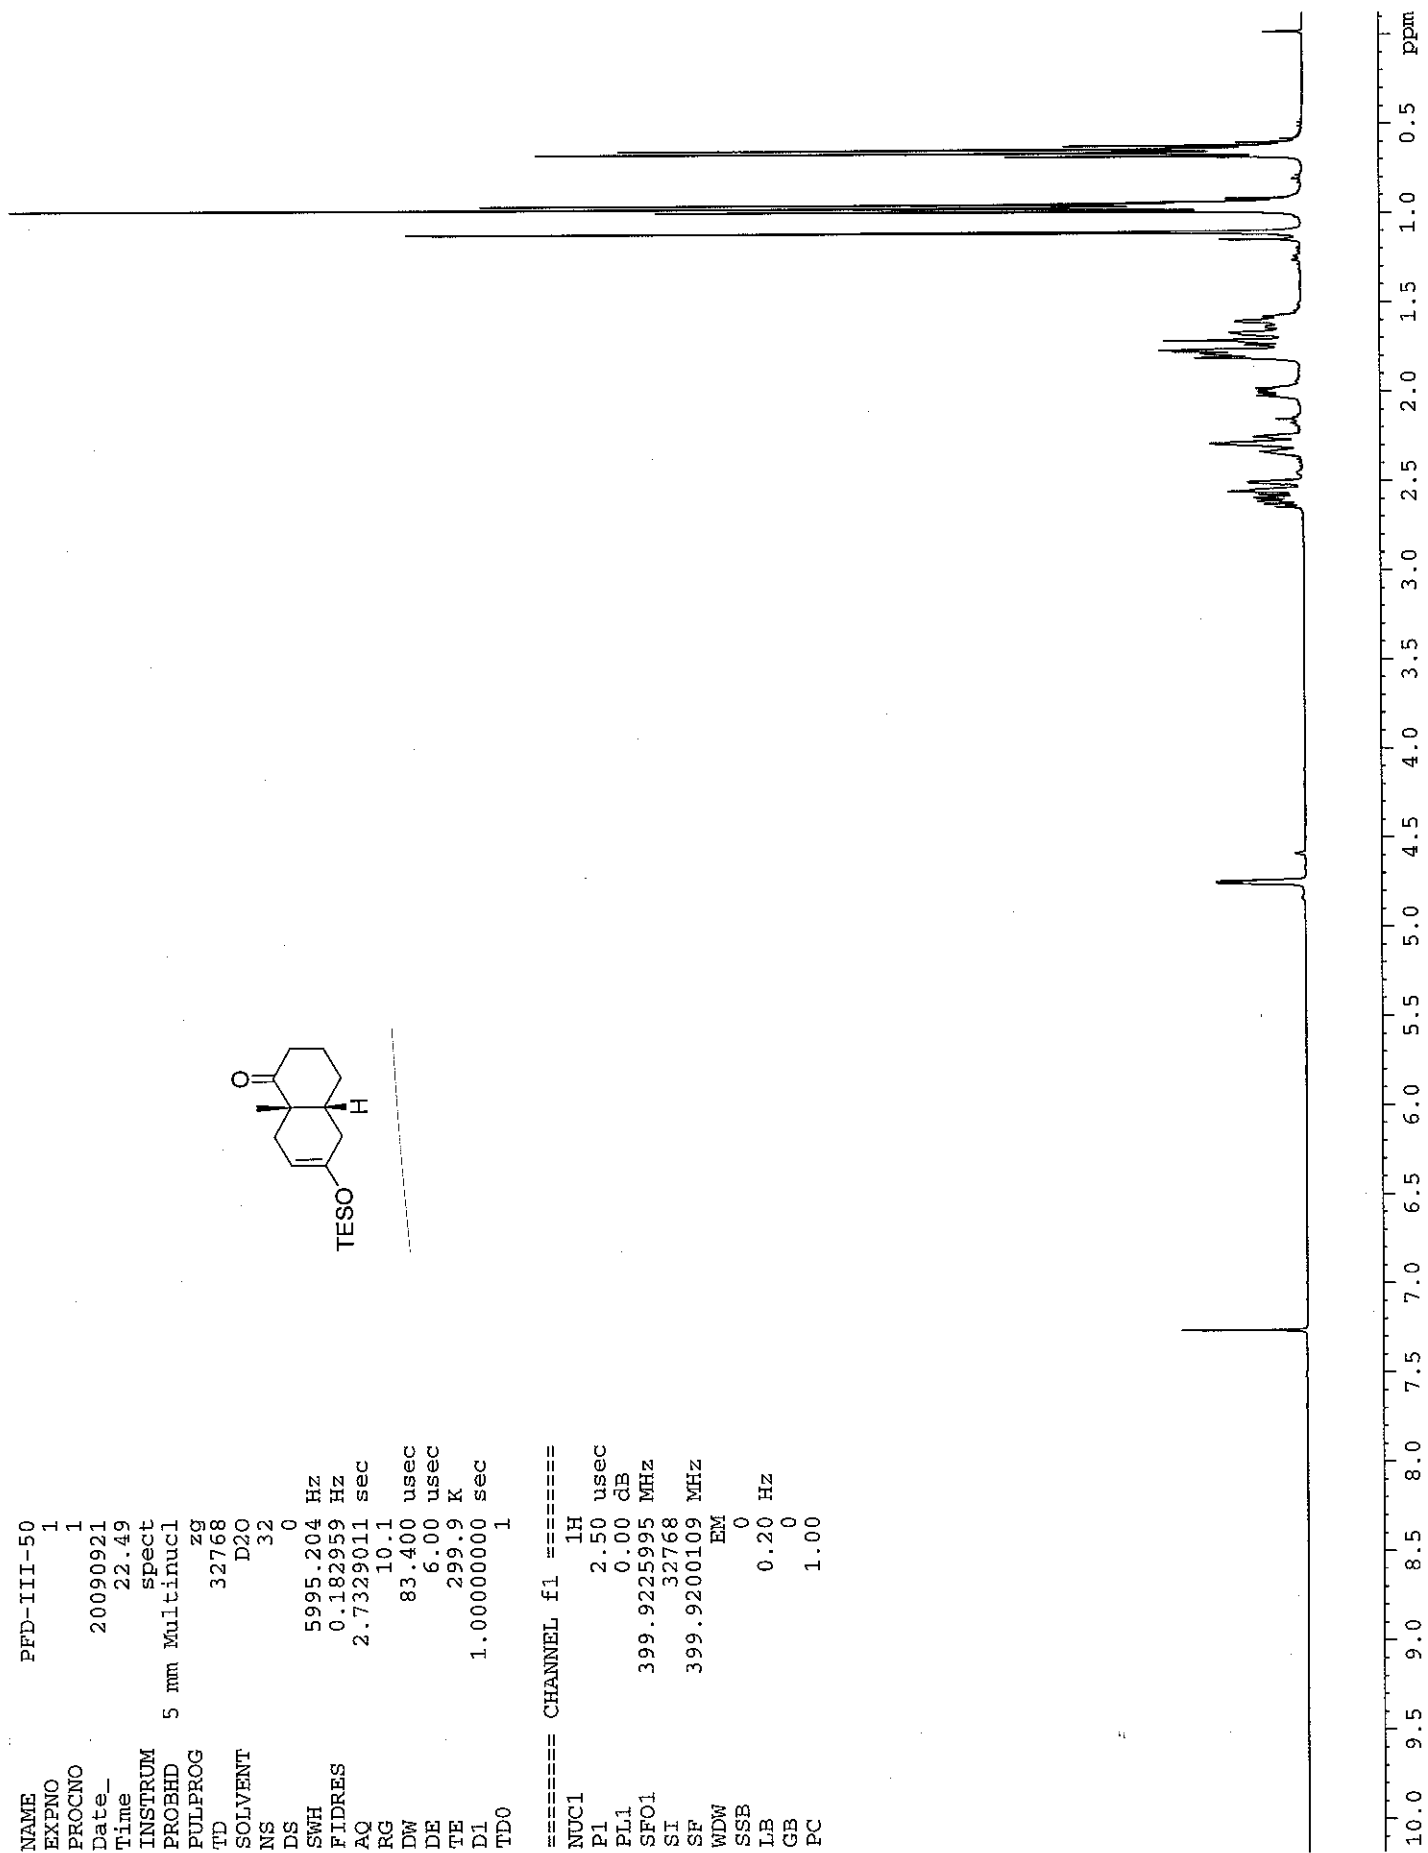

```

NAME PFD-III-50
EXPNO 2
PROCNO 1
Date_ 2009021
Time 22.53
INSTRUM spect
PROBHD 5 mm Multiruct
PULPROG zgpg30
TD 30902
SOLVENT Aceton
NS 213
DS 0
SWH 25125.629 Hz
FIDRES 0.813074 Hz
AQ 0.6149998 sec
RG 16384
DW 19.900 usec
DE 6.00 usec
TE 300.0 K
D1 0.69999999 sec
d11 0.03000000 sec
DELTA 0.59999996 sec
TD0 1

===== CHANNEL f1 =====
NUC1 13C
P1 17.50 usec
PL1 -1.00 dB
SFO1 100.5699800 MHz

===== CHANNEL f2 =====
CPDPRG2 waltz16
NUC2 1H
PCPD2 96.25 usec
PL2 0.00 dB
PL12 23.00 dB
PL13 23.00 dB
SFO2 399.9215997 MHz
SI 65536
SF 100.5599681 MHz
WDW EM
SSB 0
    
```

147.692  
 99.532  
 77.320  
 77.002  
 76.684  
 47.415  
 42.289  
 37.163  
 32.823  
 30.753  
 28.101  
 25.246  
 19.939  
 6.641  
 4.981

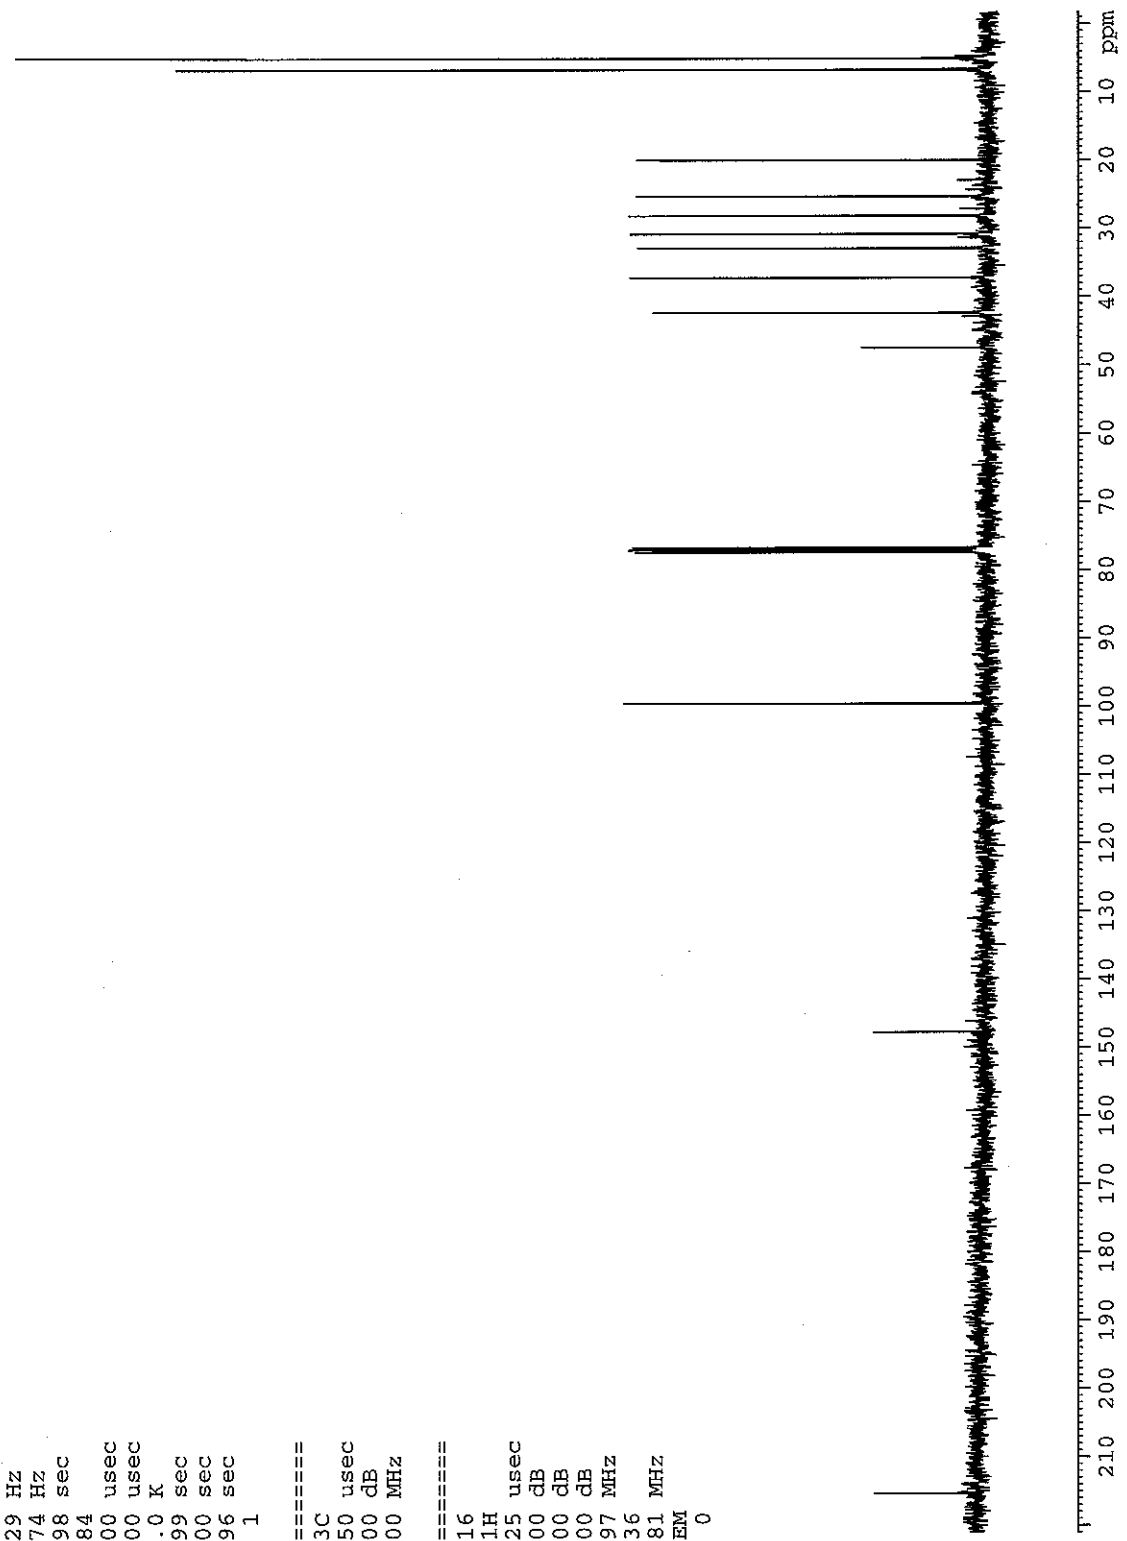

Current Data Parameters  
NAME PFD-III-78  
EXPNO 1  
PROCNO 1

F2 - Acquisition Parameters

Date\_ 20111128  
Time 10.21  
INSTRUM spect  
PROBHD 5 mm PATXI 1H/  
PULPROG zg30  
TD 65536  
SOLVENT CDC13  
NS 23  
DS 0  
SWH 10330.578 Hz  
FIDRES 0.157632 Hz  
AQ 3.1719923 sec  
RG 113  
DW 48.400 usec  
DE 6.50 usec  
TE 298.0 K  
D1 1.5000000 sec

==== CHANNEL f1 =====  
NUC1 1H  
P1 8.00 usec  
PLW1 14.79100037 W  
SF01 500.1330885 MHz

F2 - Processing parameters

SI 65536  
SF 500.130000 MHz  
WDW EM  
SSB 0  
LB 0.30 Hz  
GB 0  
PC 1.00

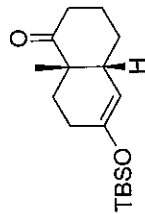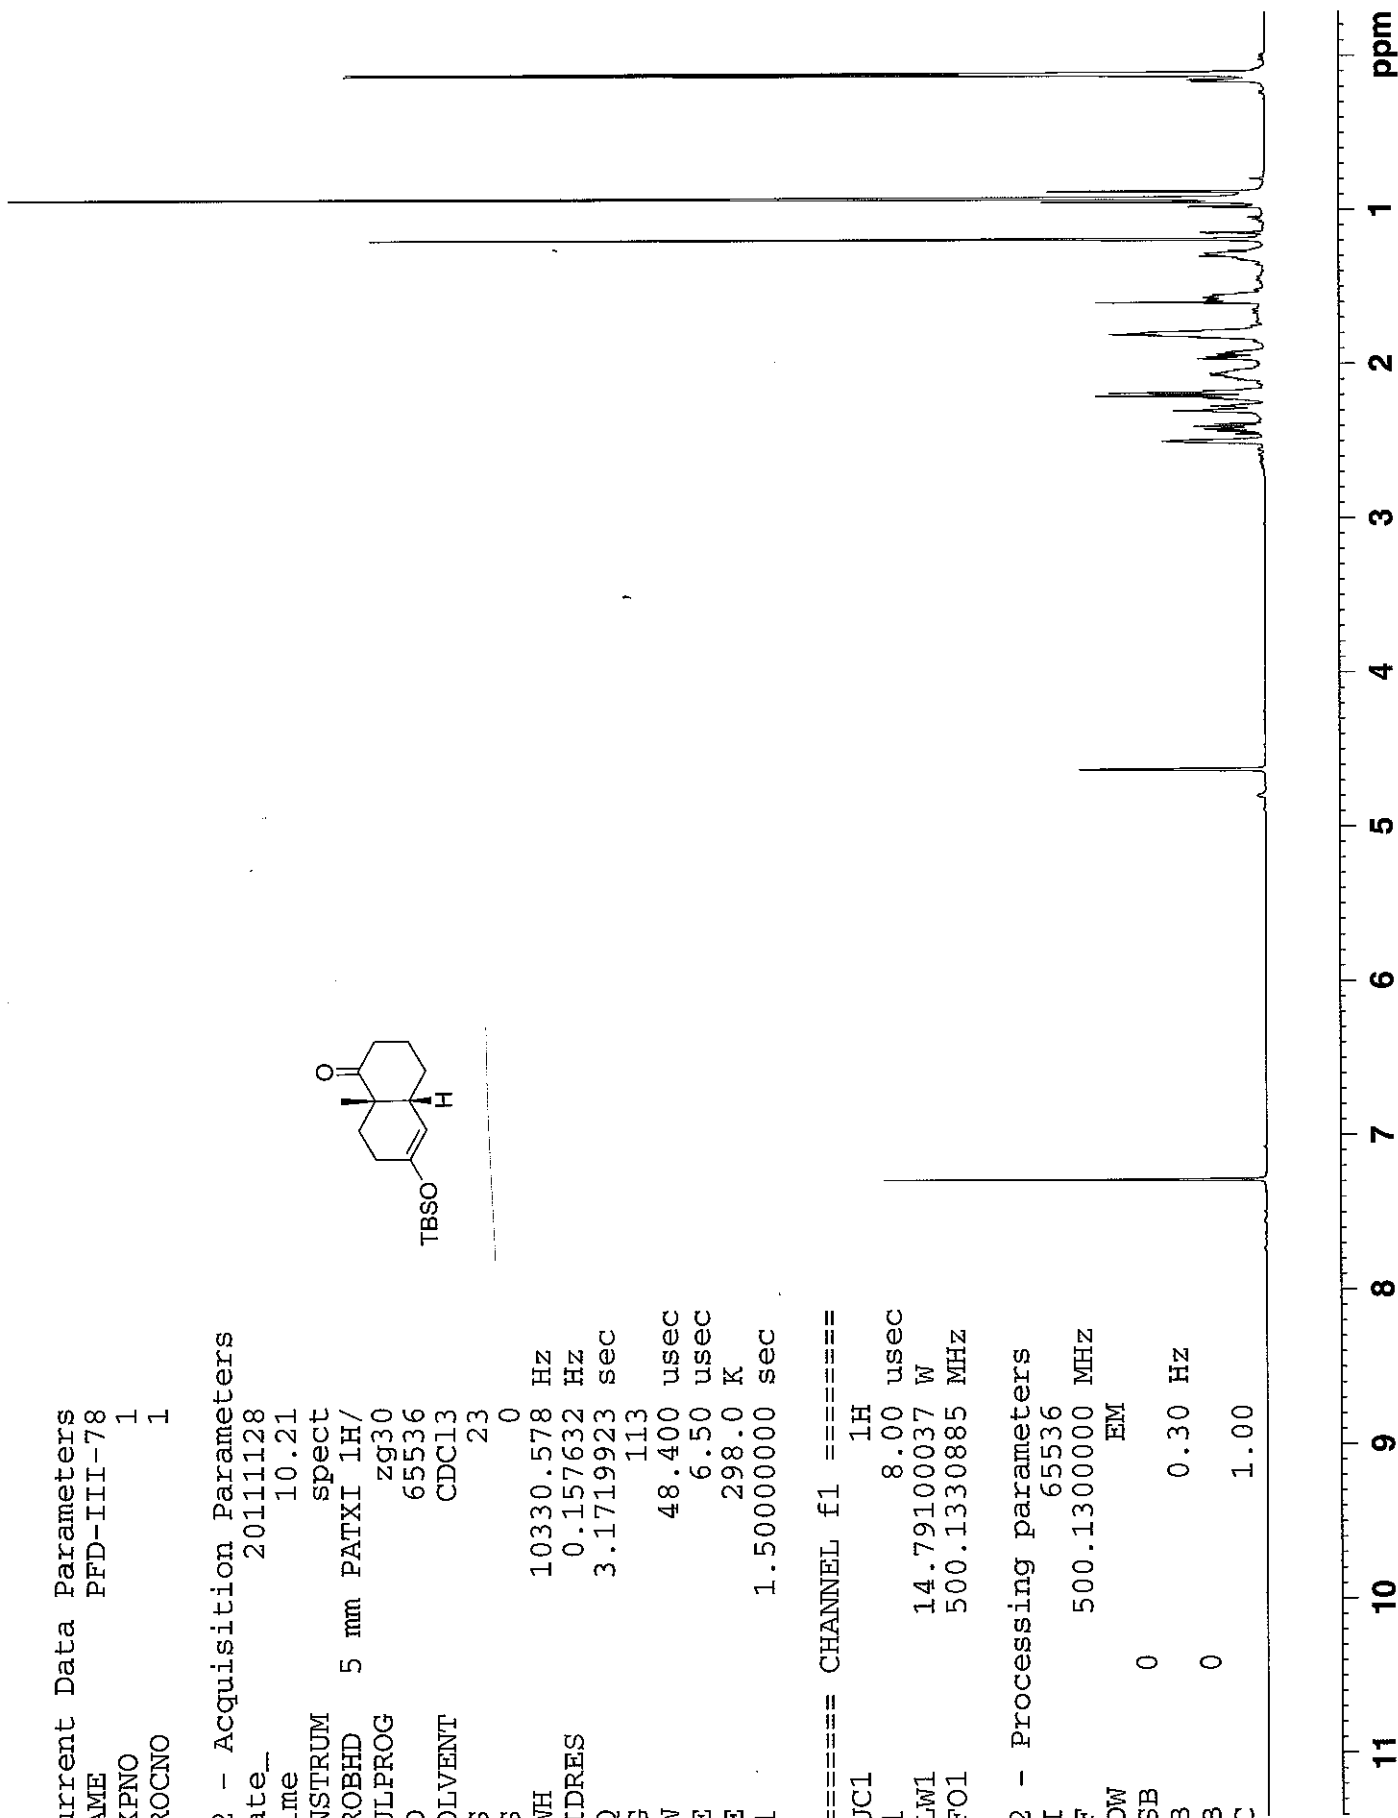

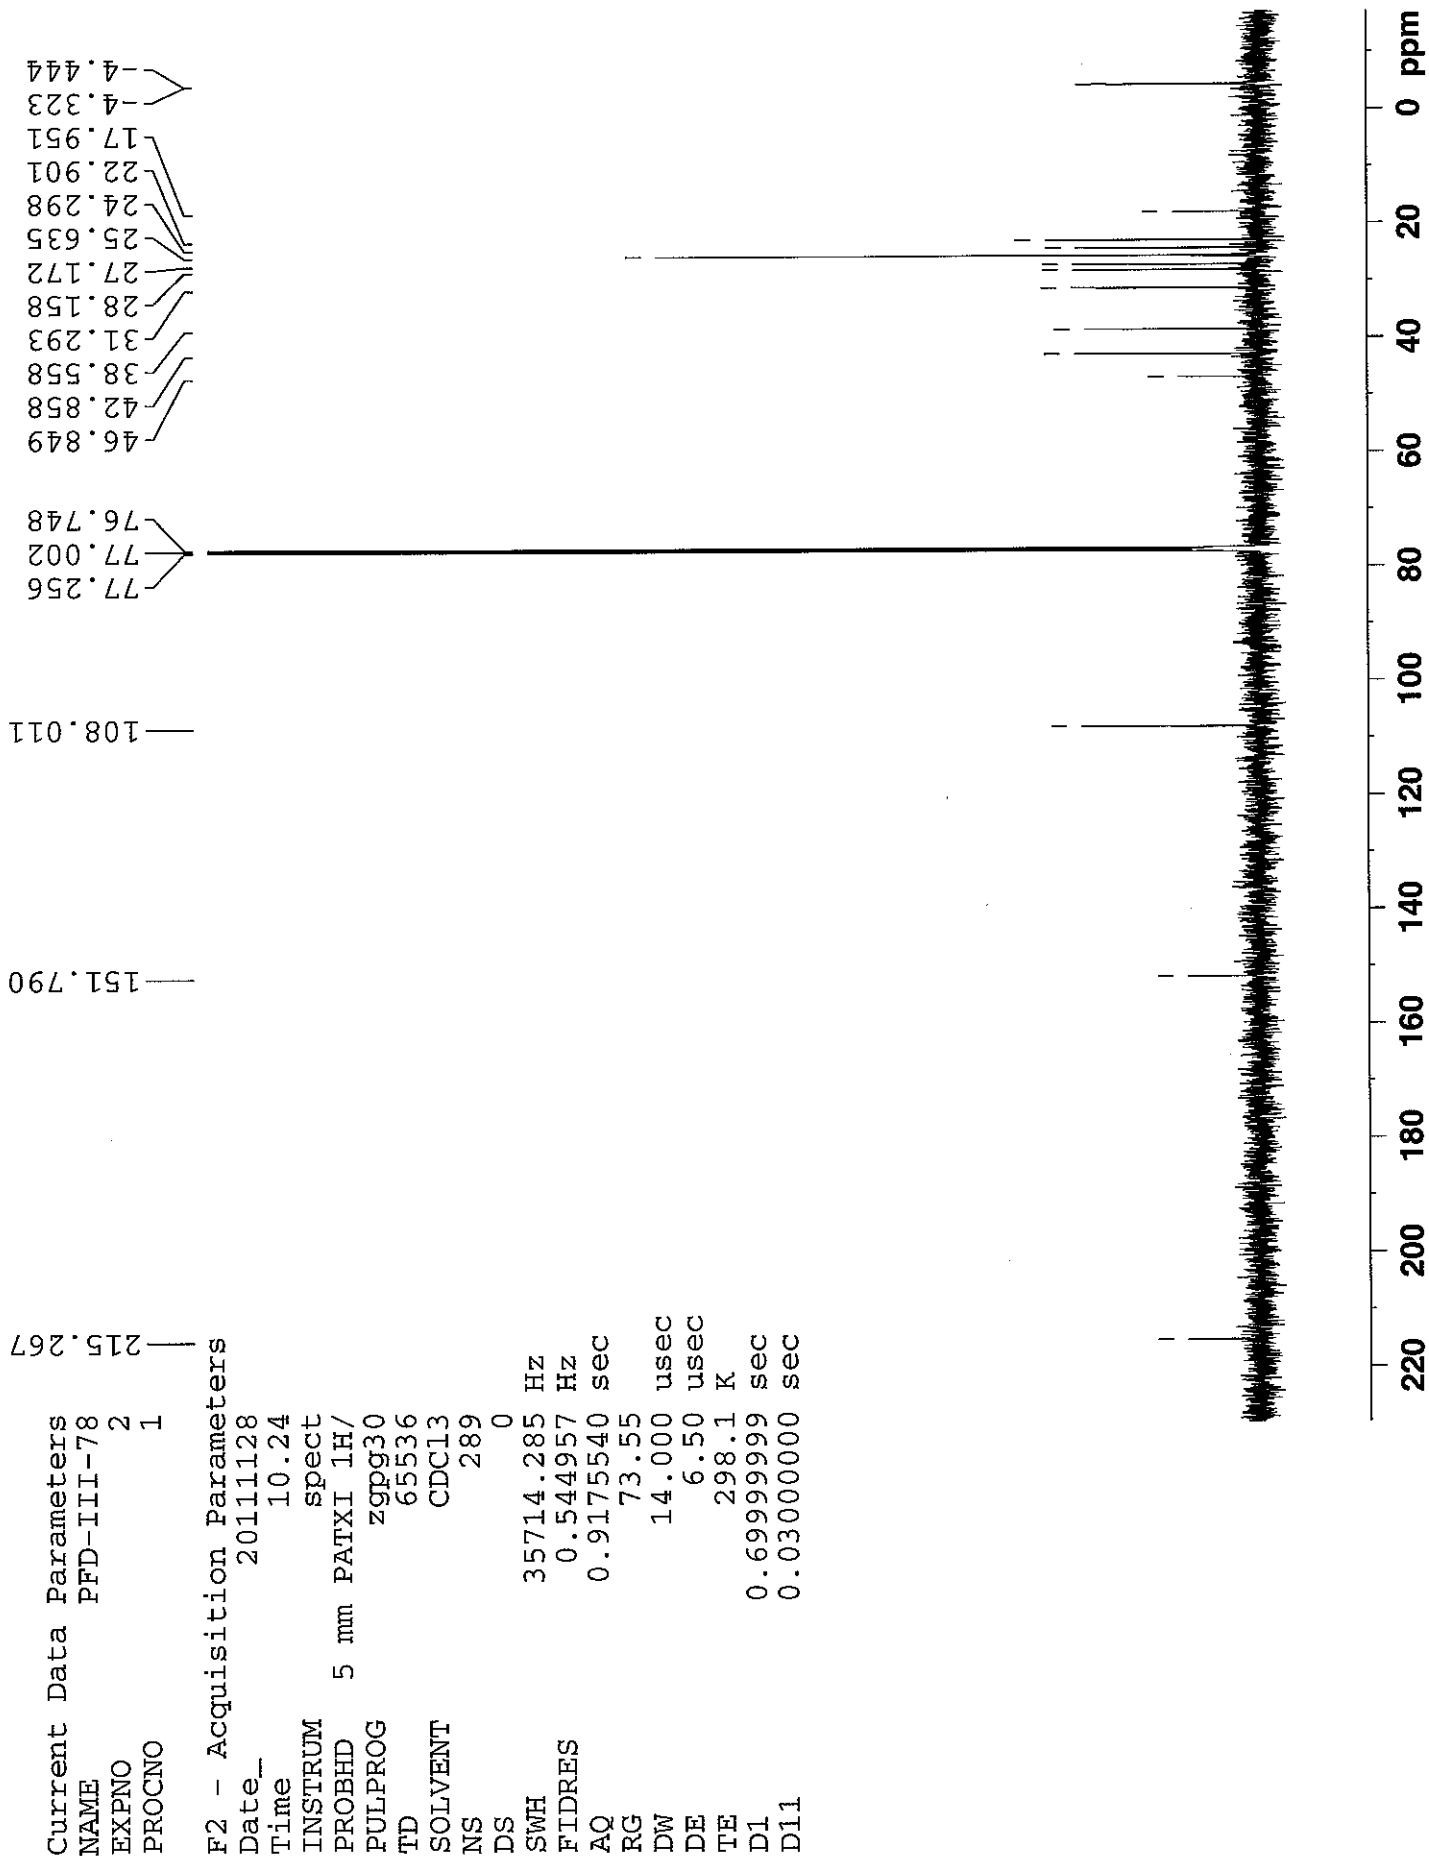

NAME PFD-III-57  
EXPNO 1  
PROCNO 1  
Date\_ 20090922  
Time 0.35  
INSTRUM spect  
PROBHD 5 mm Multinucl  
PULPROG zg  
TD 32768  
SOLVENT D2O  
NS 32  
DS 0  
SWH 5995.204 Hz  
FIDRES 0.182959 Hz  
AQ 2.7329011 sec  
RG 10.1  
DW 83.400 usec  
DE 6.00 usec  
TE 300.1 K  
D1 1.00000000 sec  
TD0 1

==== CHANNEL f1 =====  
NUC1 1H  
P1 2.50 usec  
PL1 0.00 dB  
SFO1 399.9225995 MHz  
SI 32768  
SF 399.9200109 MHz  
WDW EM  
SSB 0  
LB 0.20 Hz  
GB 0  
PC 1.00

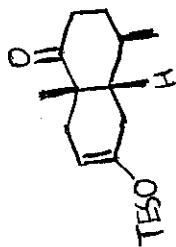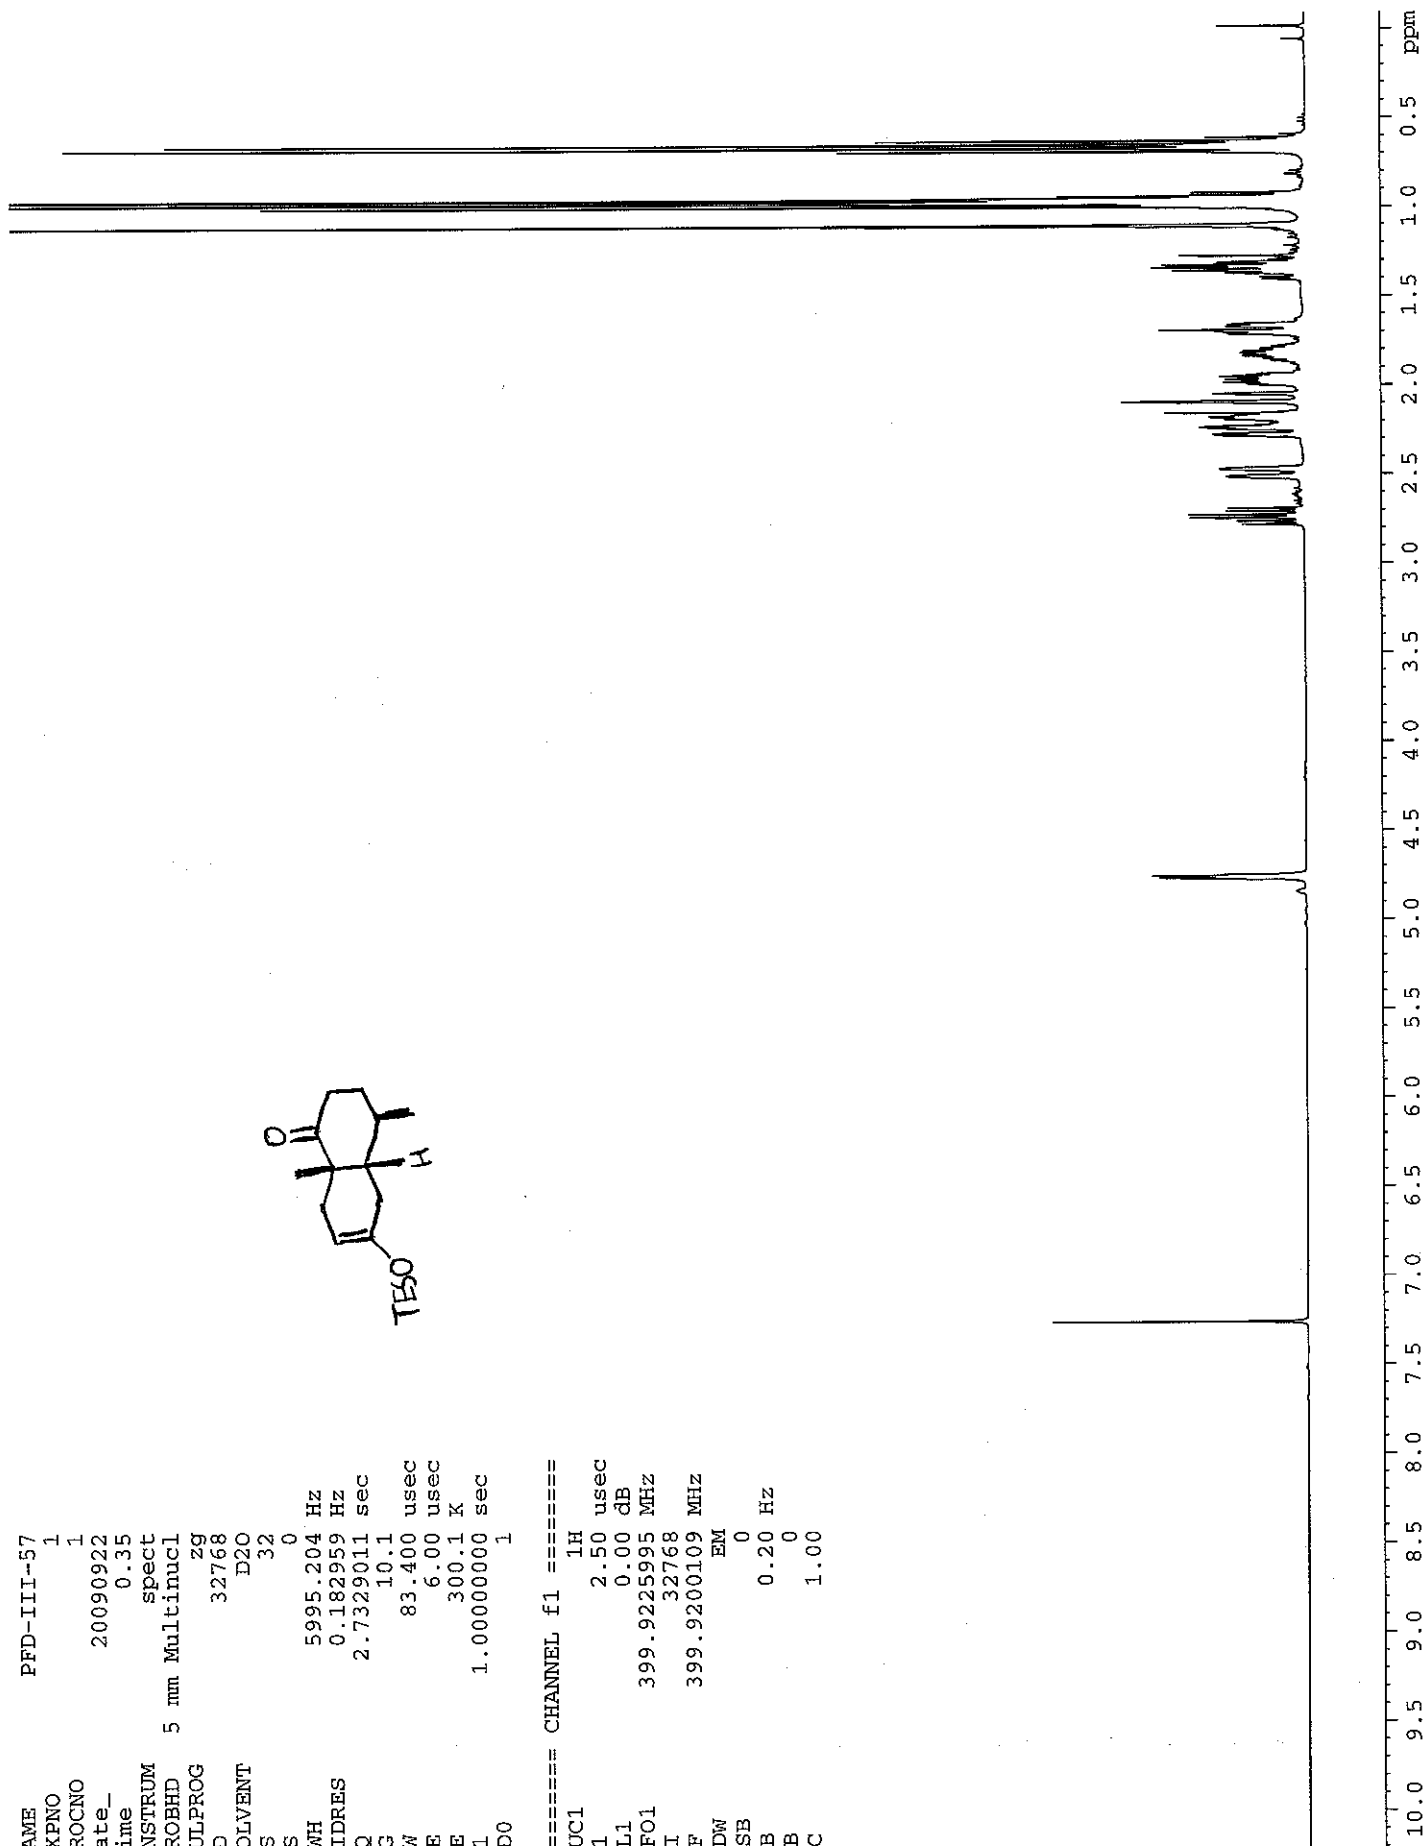

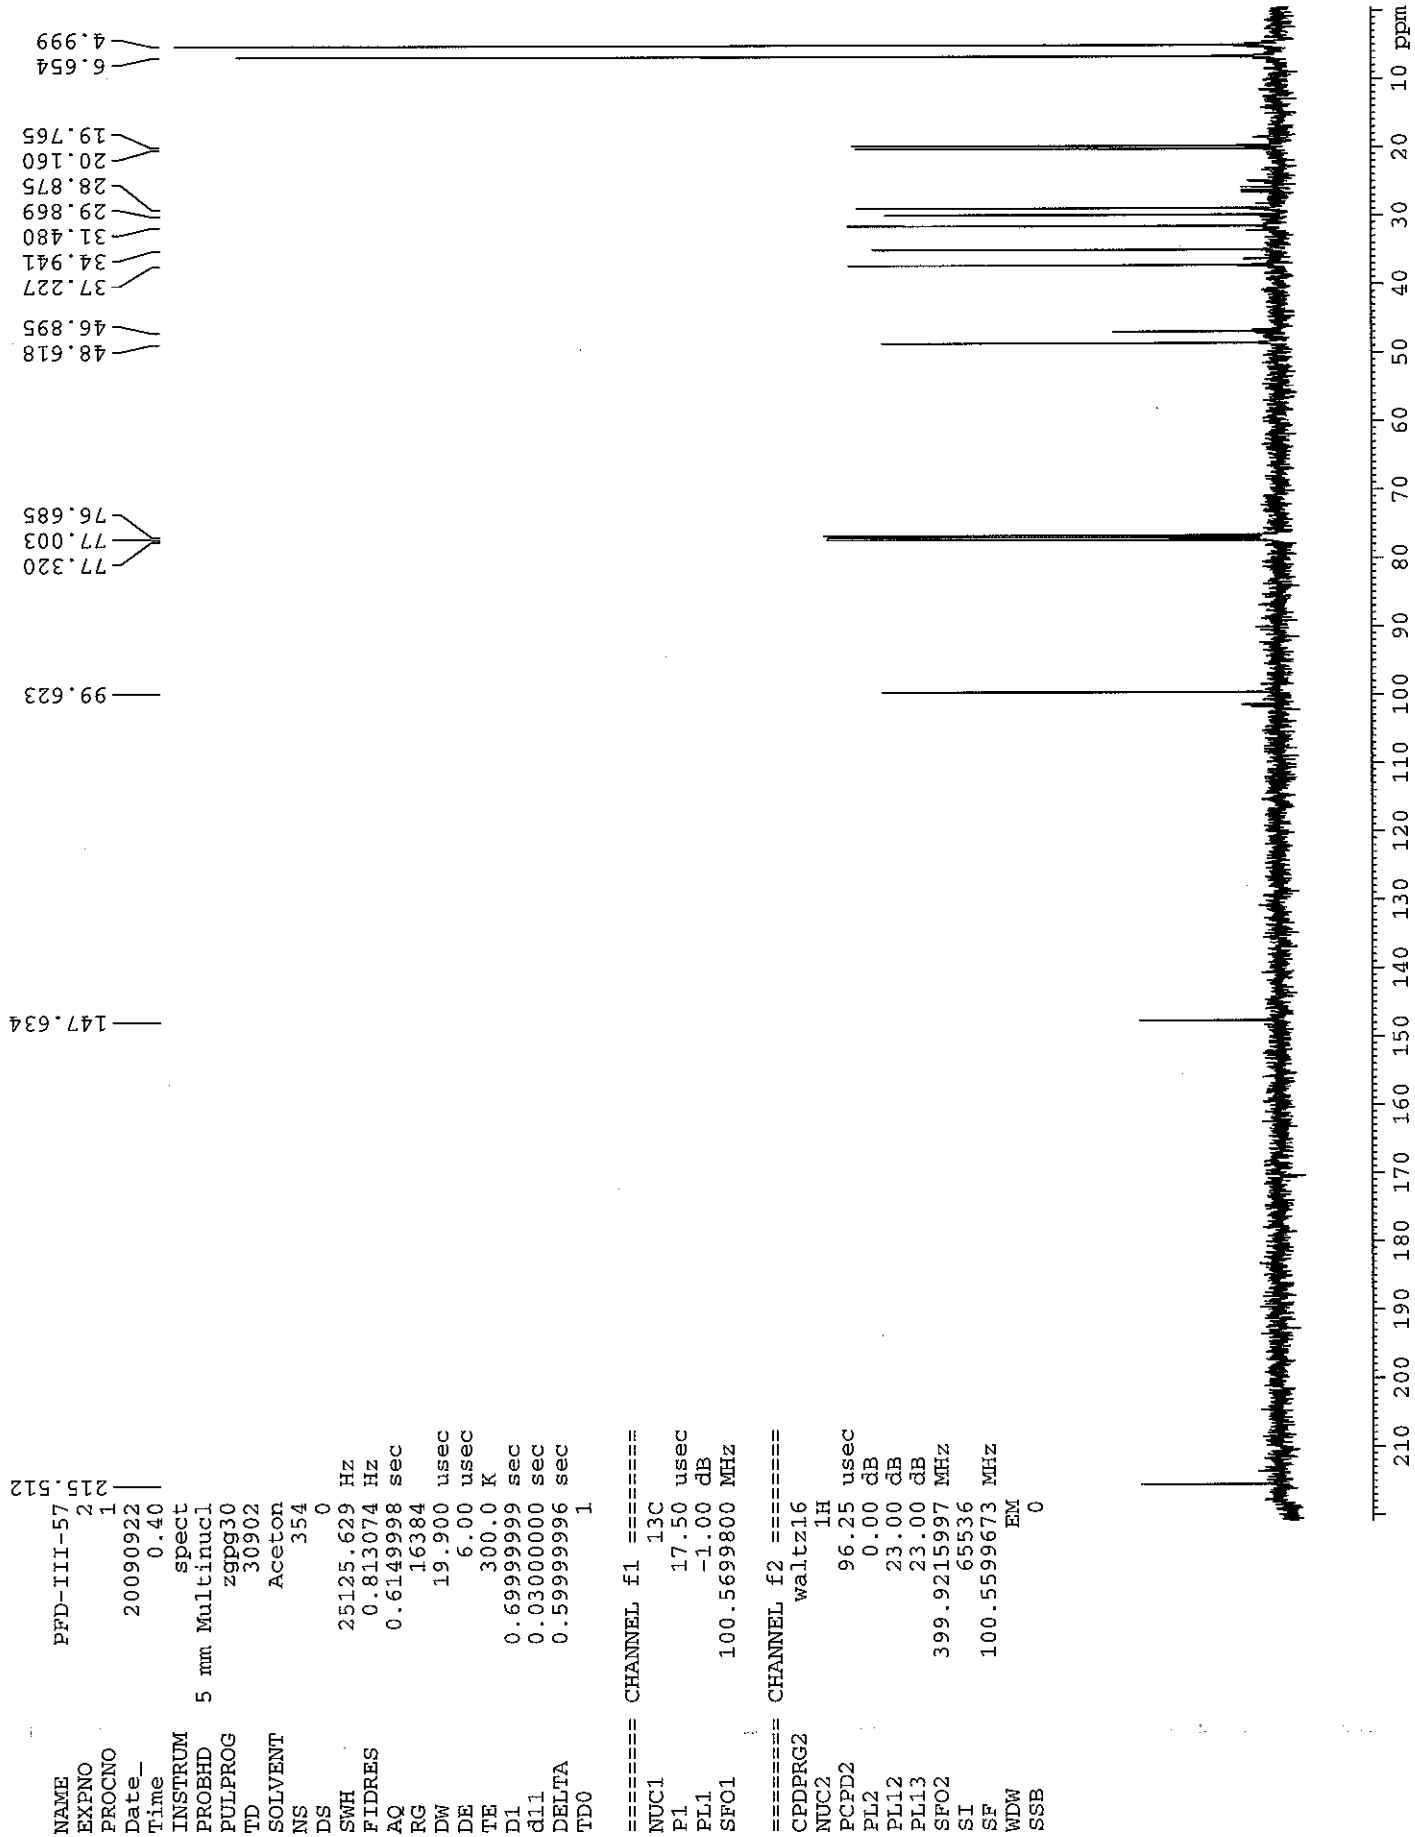

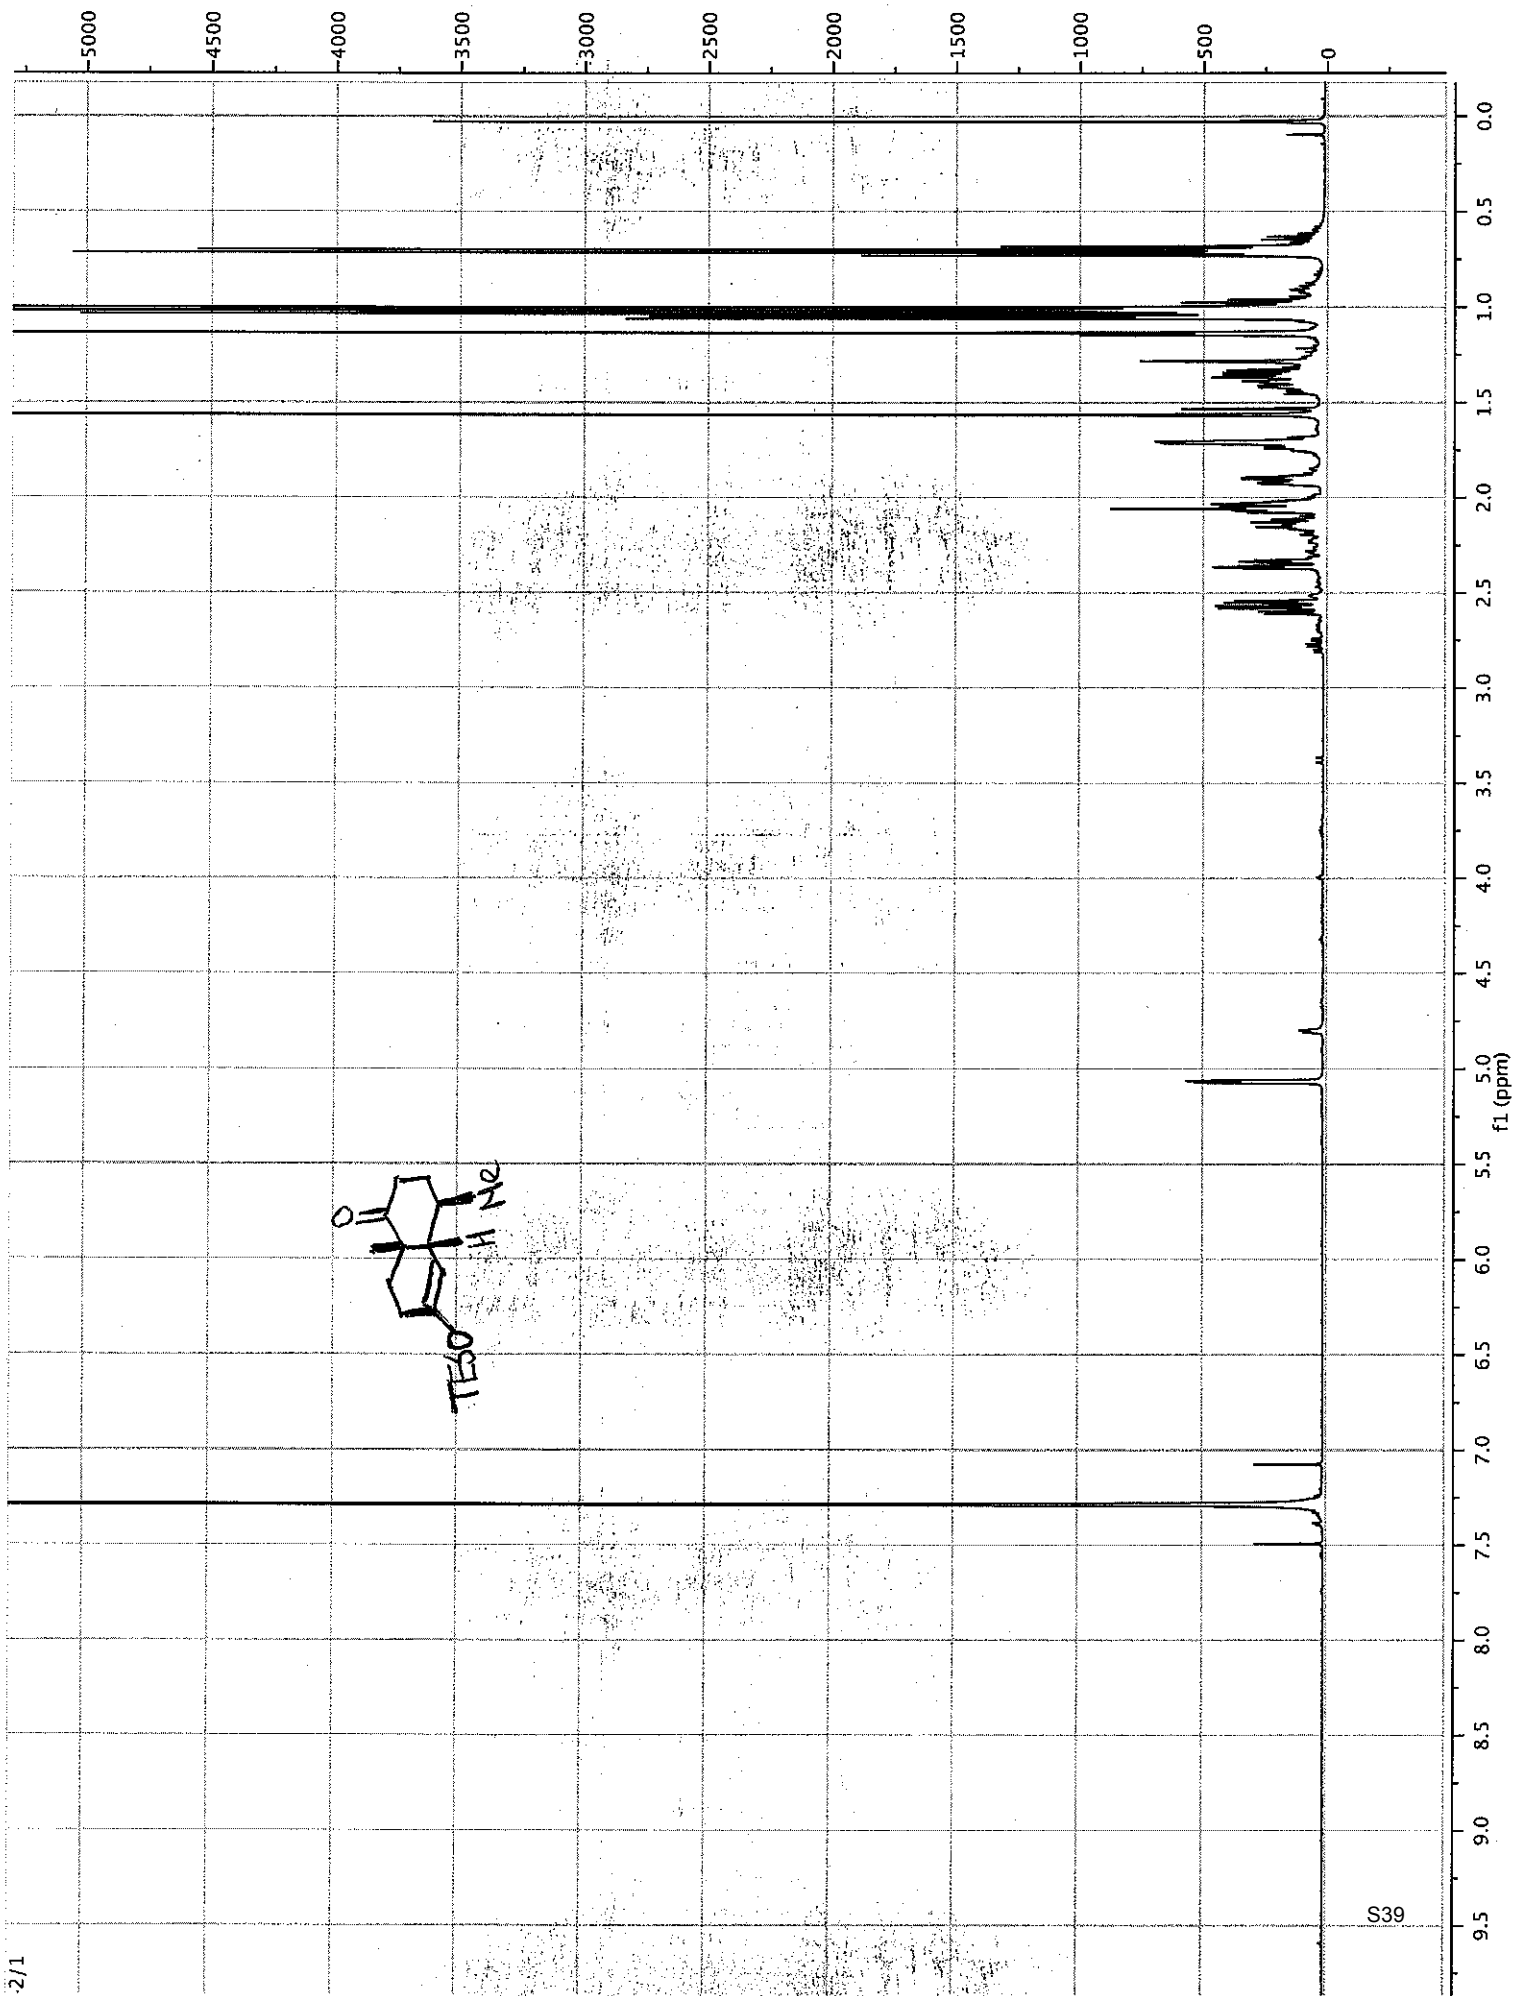

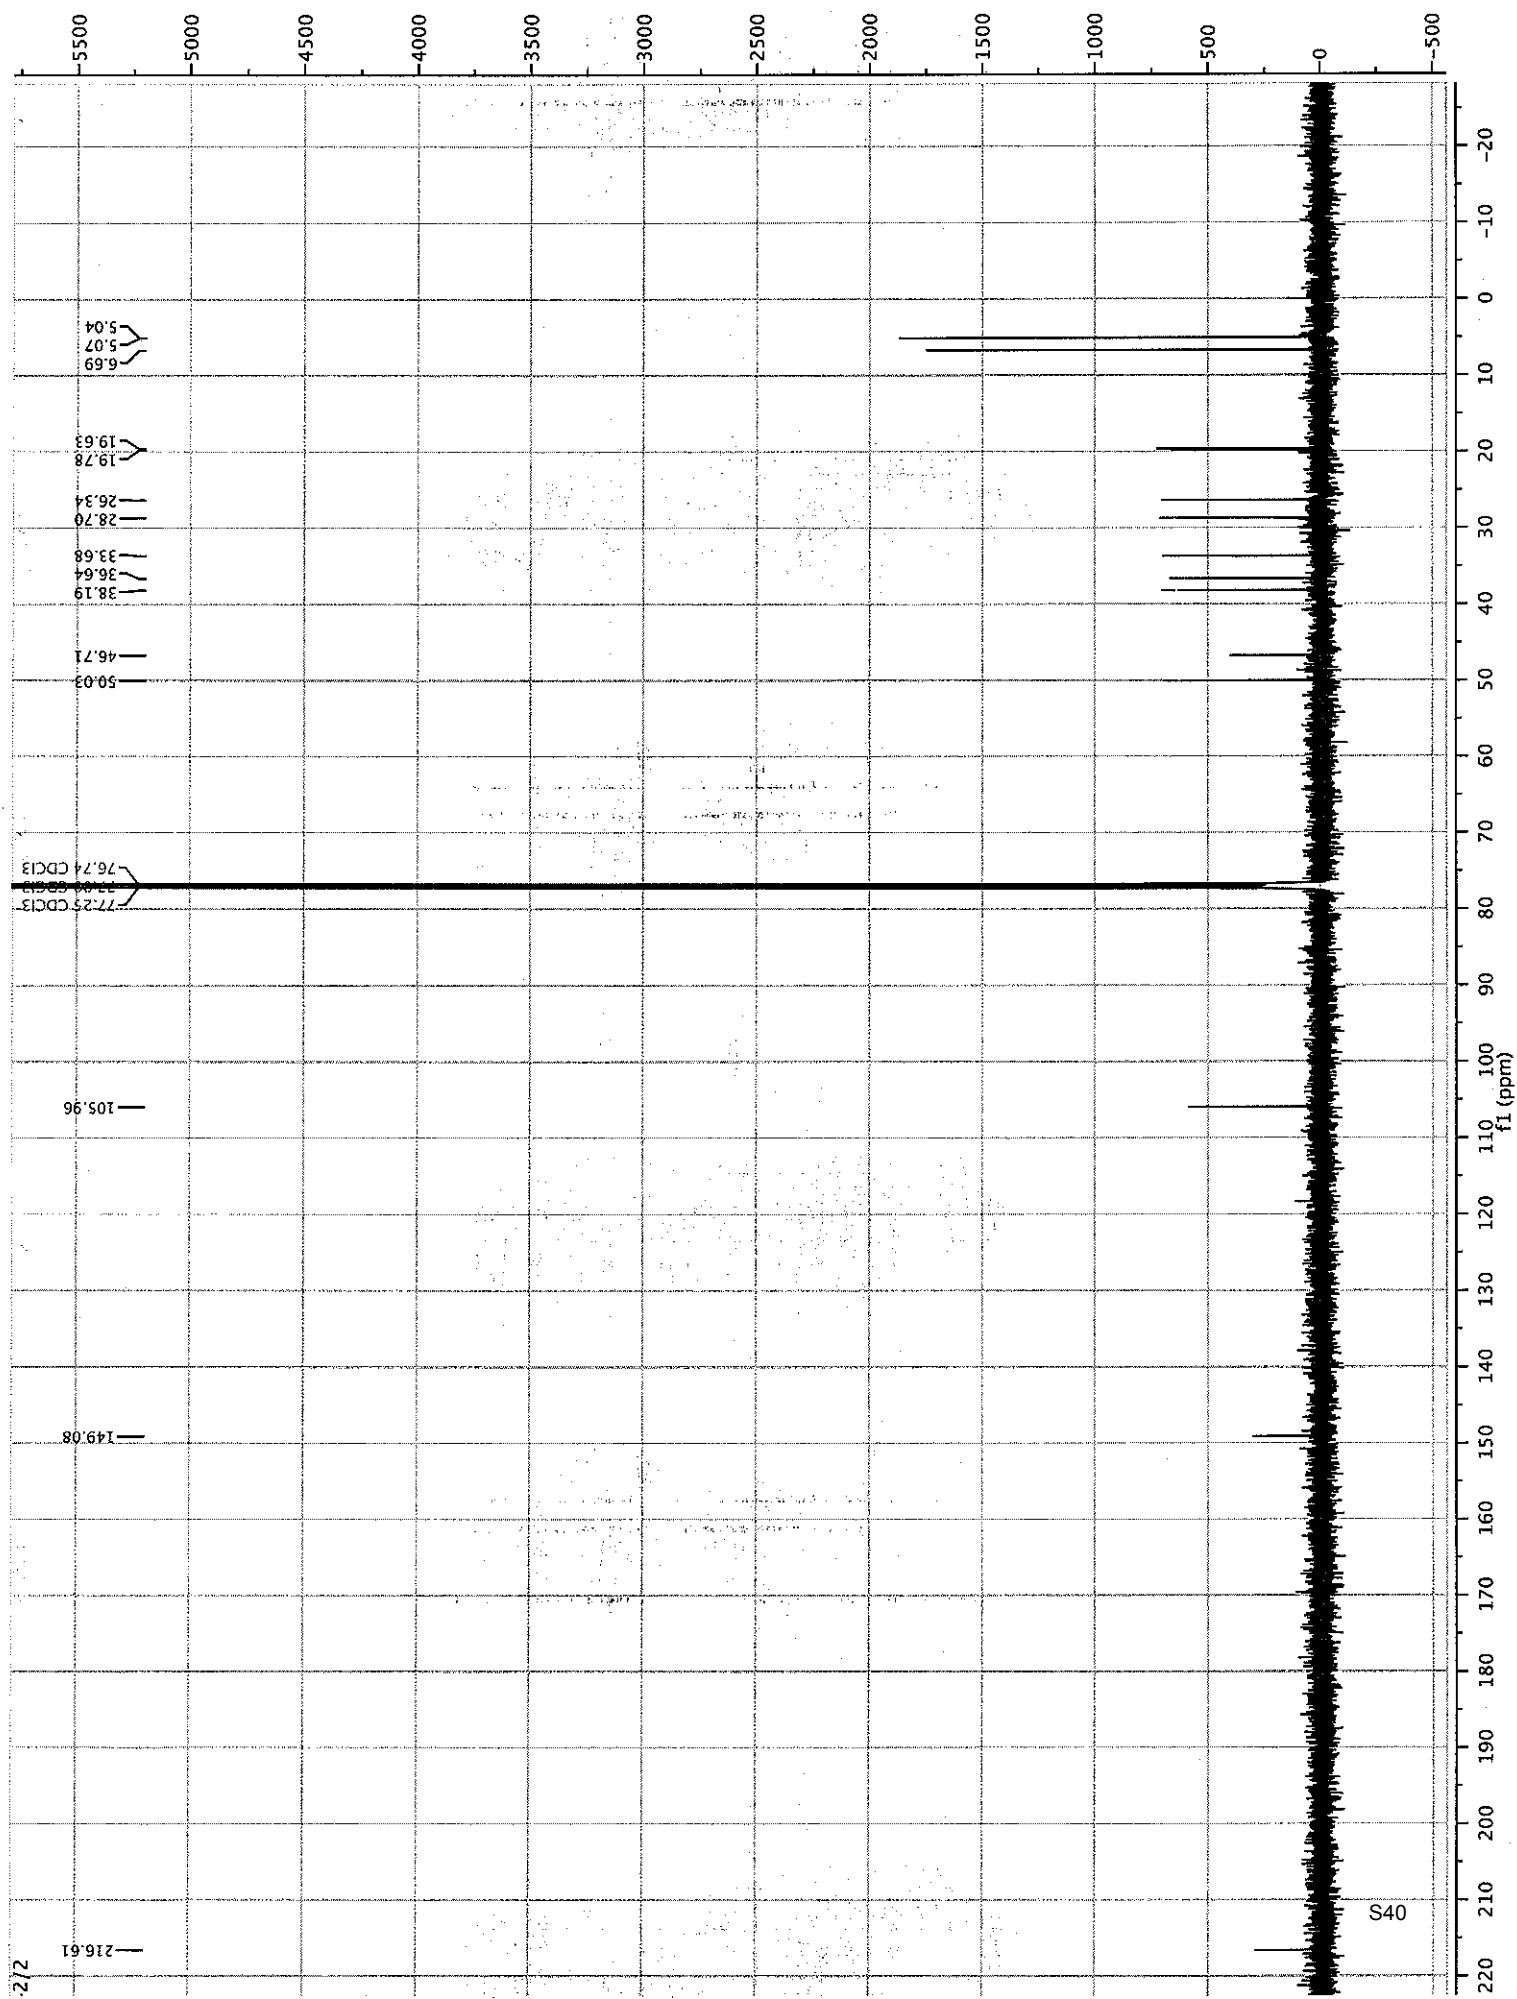



NAME PFD-III-59-r2  
EXPNO 1  
PROCNO 1  
Date\_ 20090924  
Time 15.43  
INSTRUM spect  
PROBHD 5 mm Multinucl  
PULPROG zg  
TD 32768  
SOLVENT D2O  
NS 32  
DS 0  
SWH 10416.667 Hz  
FIDRES 0.317891 Hz  
AQ 1.5729140 sec  
RG 10.1  
DW 48.000 usec  
DE 6.00 usec  
TE 300.0 K  
D1 1.00000000 sec  
TD0 1

==== CHANNEL f1 =====  
NUC1 1H  
P1 2.50 usec  
PL1 0.00 dB  
SFO1 399.9225995 MHz  
SI 32768  
SF 399.9179515 MHz  
WDW EM  
SSB 0  
LB 0.20 Hz  
GB 0  
PC 1.00

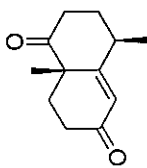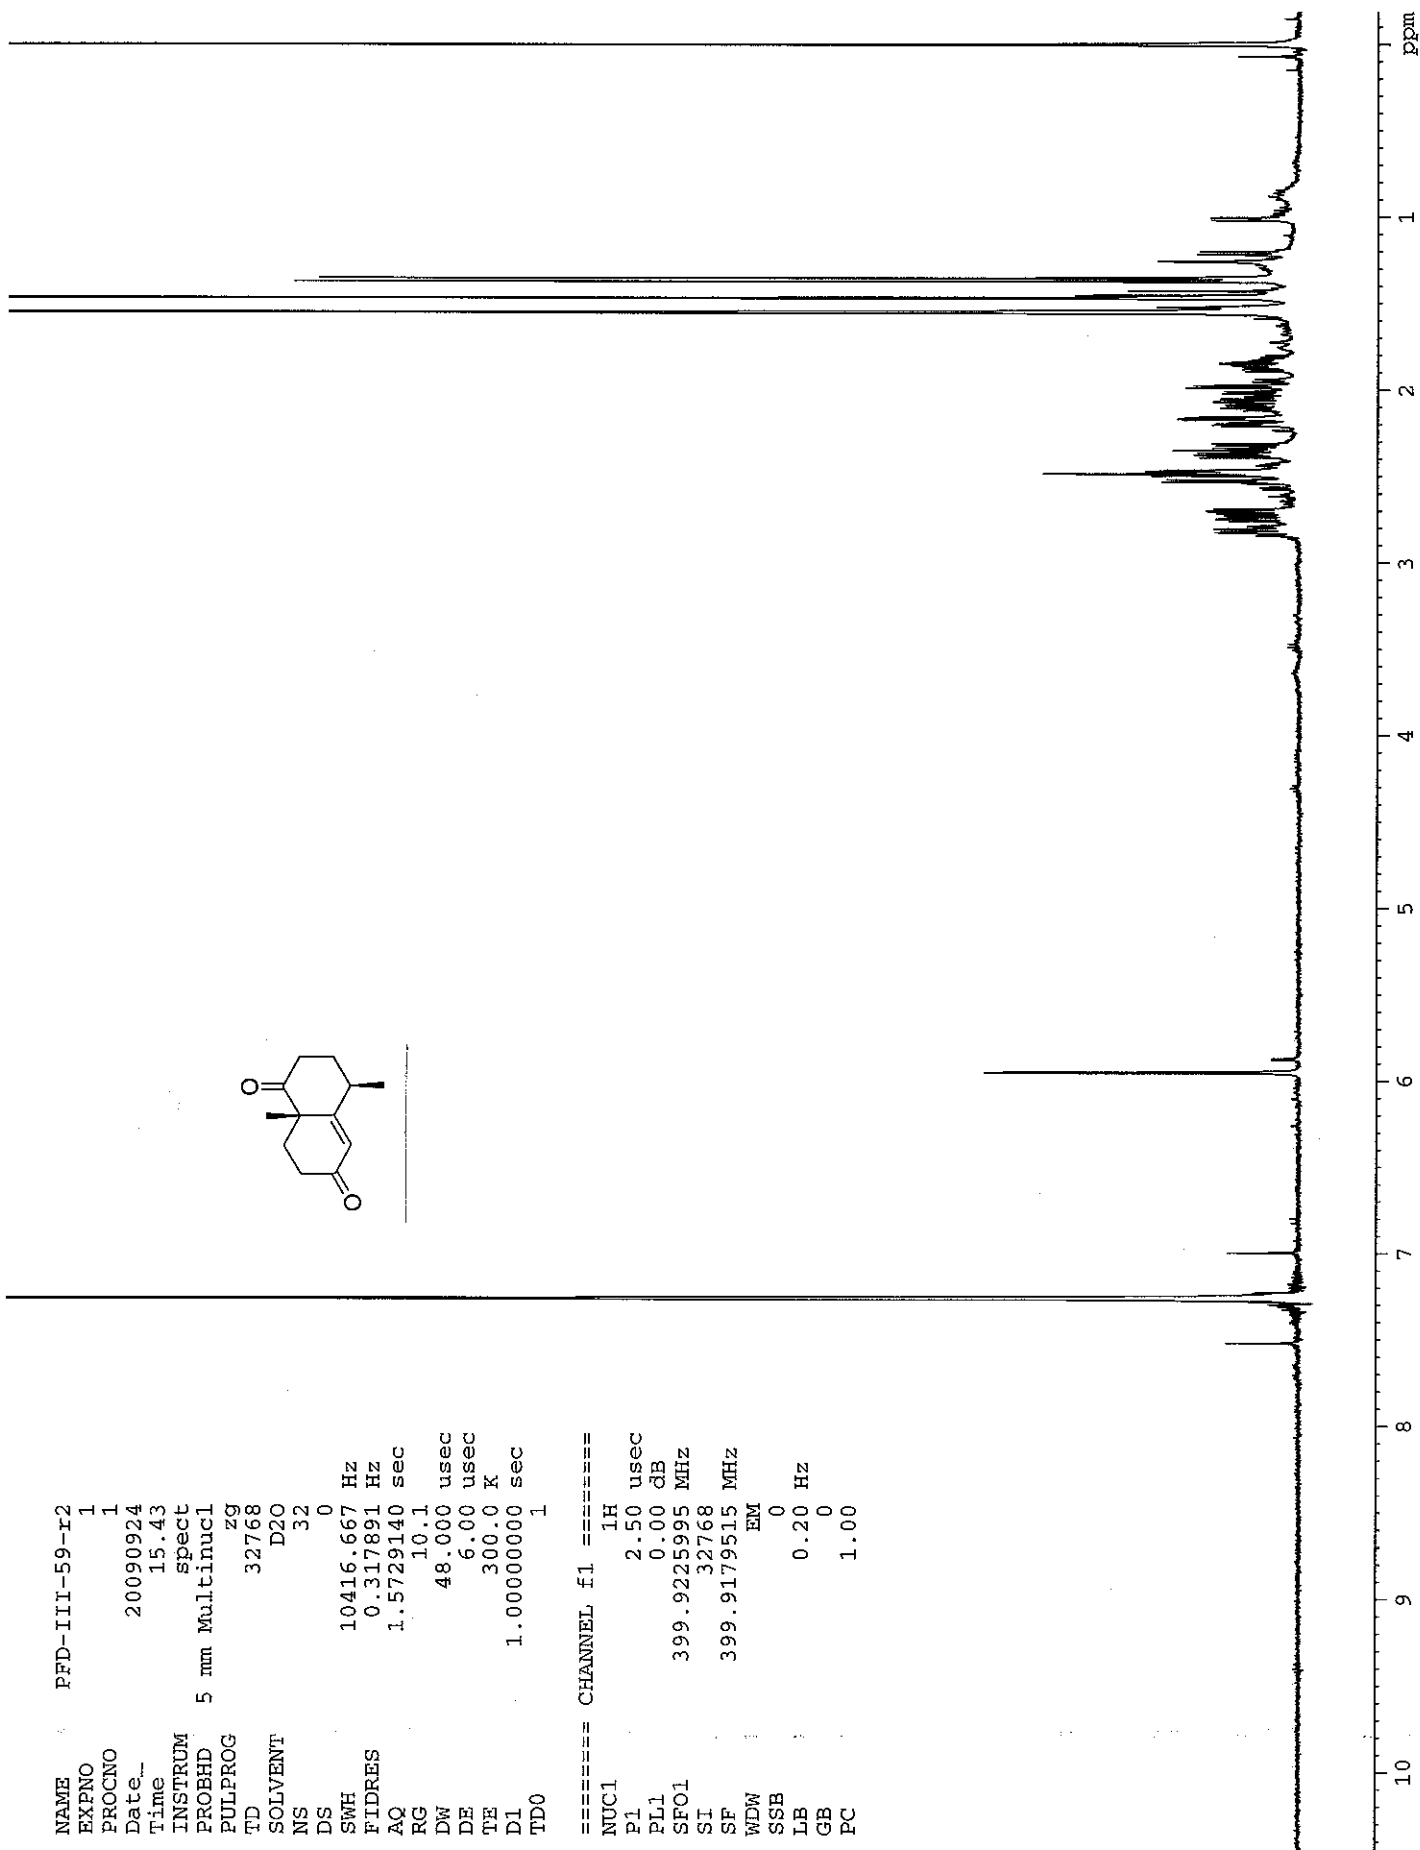

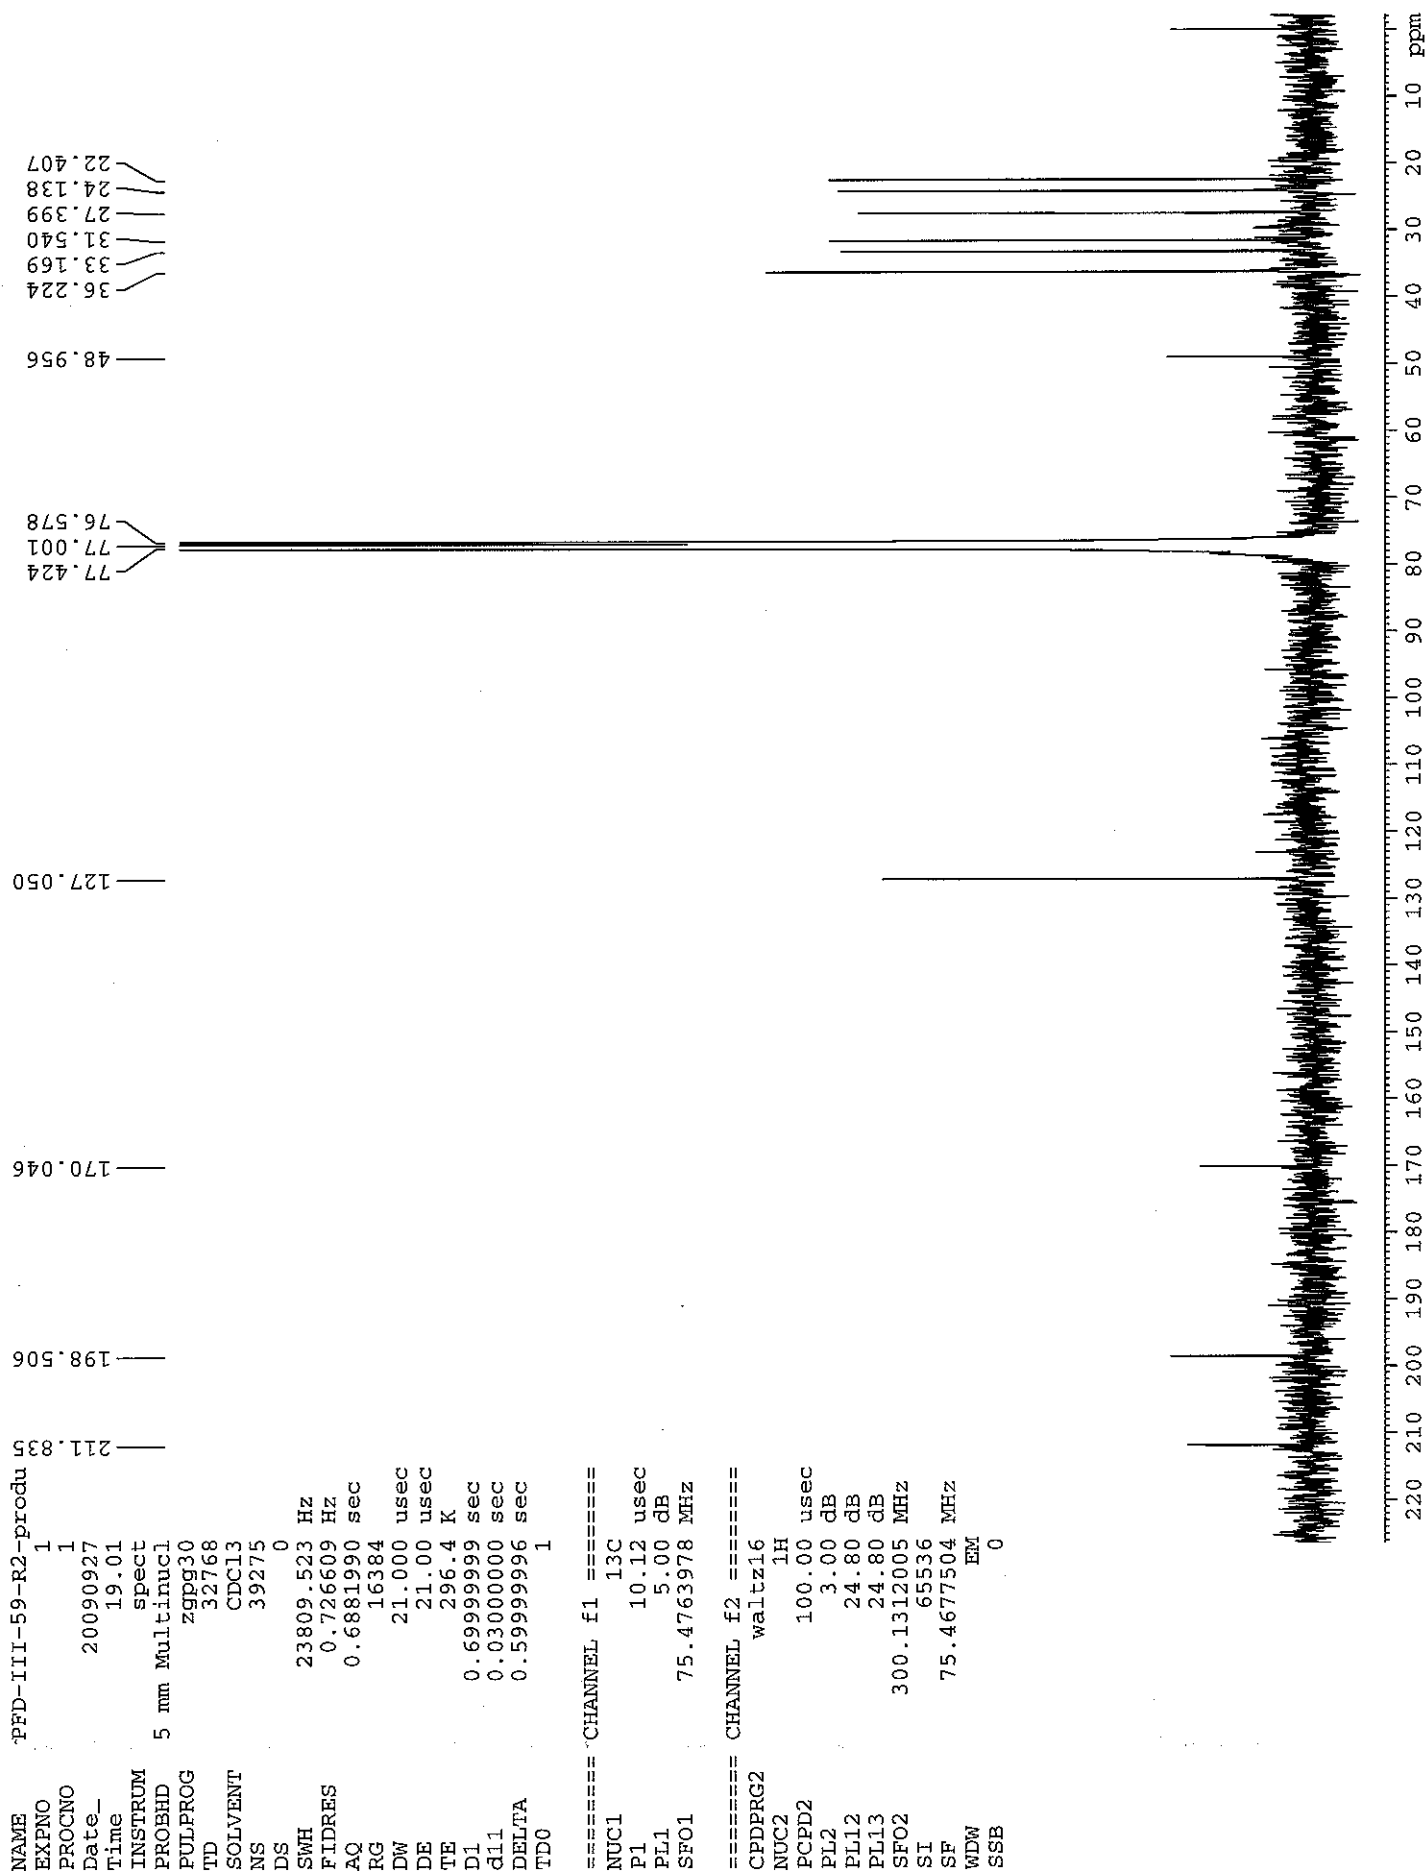

NAME PFD-III-125  
EXPNO 1  
PROCNO 1  
Date\_ 20110126  
Time 21.40  
INSTRUM spect  
PROBHD 5 mm PABBO BB-  
PULPROG zg30  
TD 32768  
SOLVENT CDCl3  
NS 32  
DS 0  
SWH 6009.615 Hz  
FIDRES 0.183399 Hz  
AQ 2.7263477 sec  
RG 32  
DW 83.200 usec  
DE 6.50 usec  
TE 295.3 K  
D1 1.00000000 sec  
TD0 1

==== CHANNEL f1 =====  
NUC1 1H  
P1 9.50 usec  
PL1 -4.00 dB  
PL1W 26.94187927 W  
SF01 400.1328009 MHZ  
SI 32768  
SF 400.1300000 MHZ  
WDW EM  
SSB 0  
LB 0.20 Hz  
GB 0  
PC 1.40

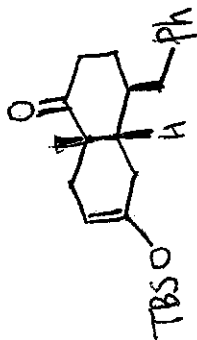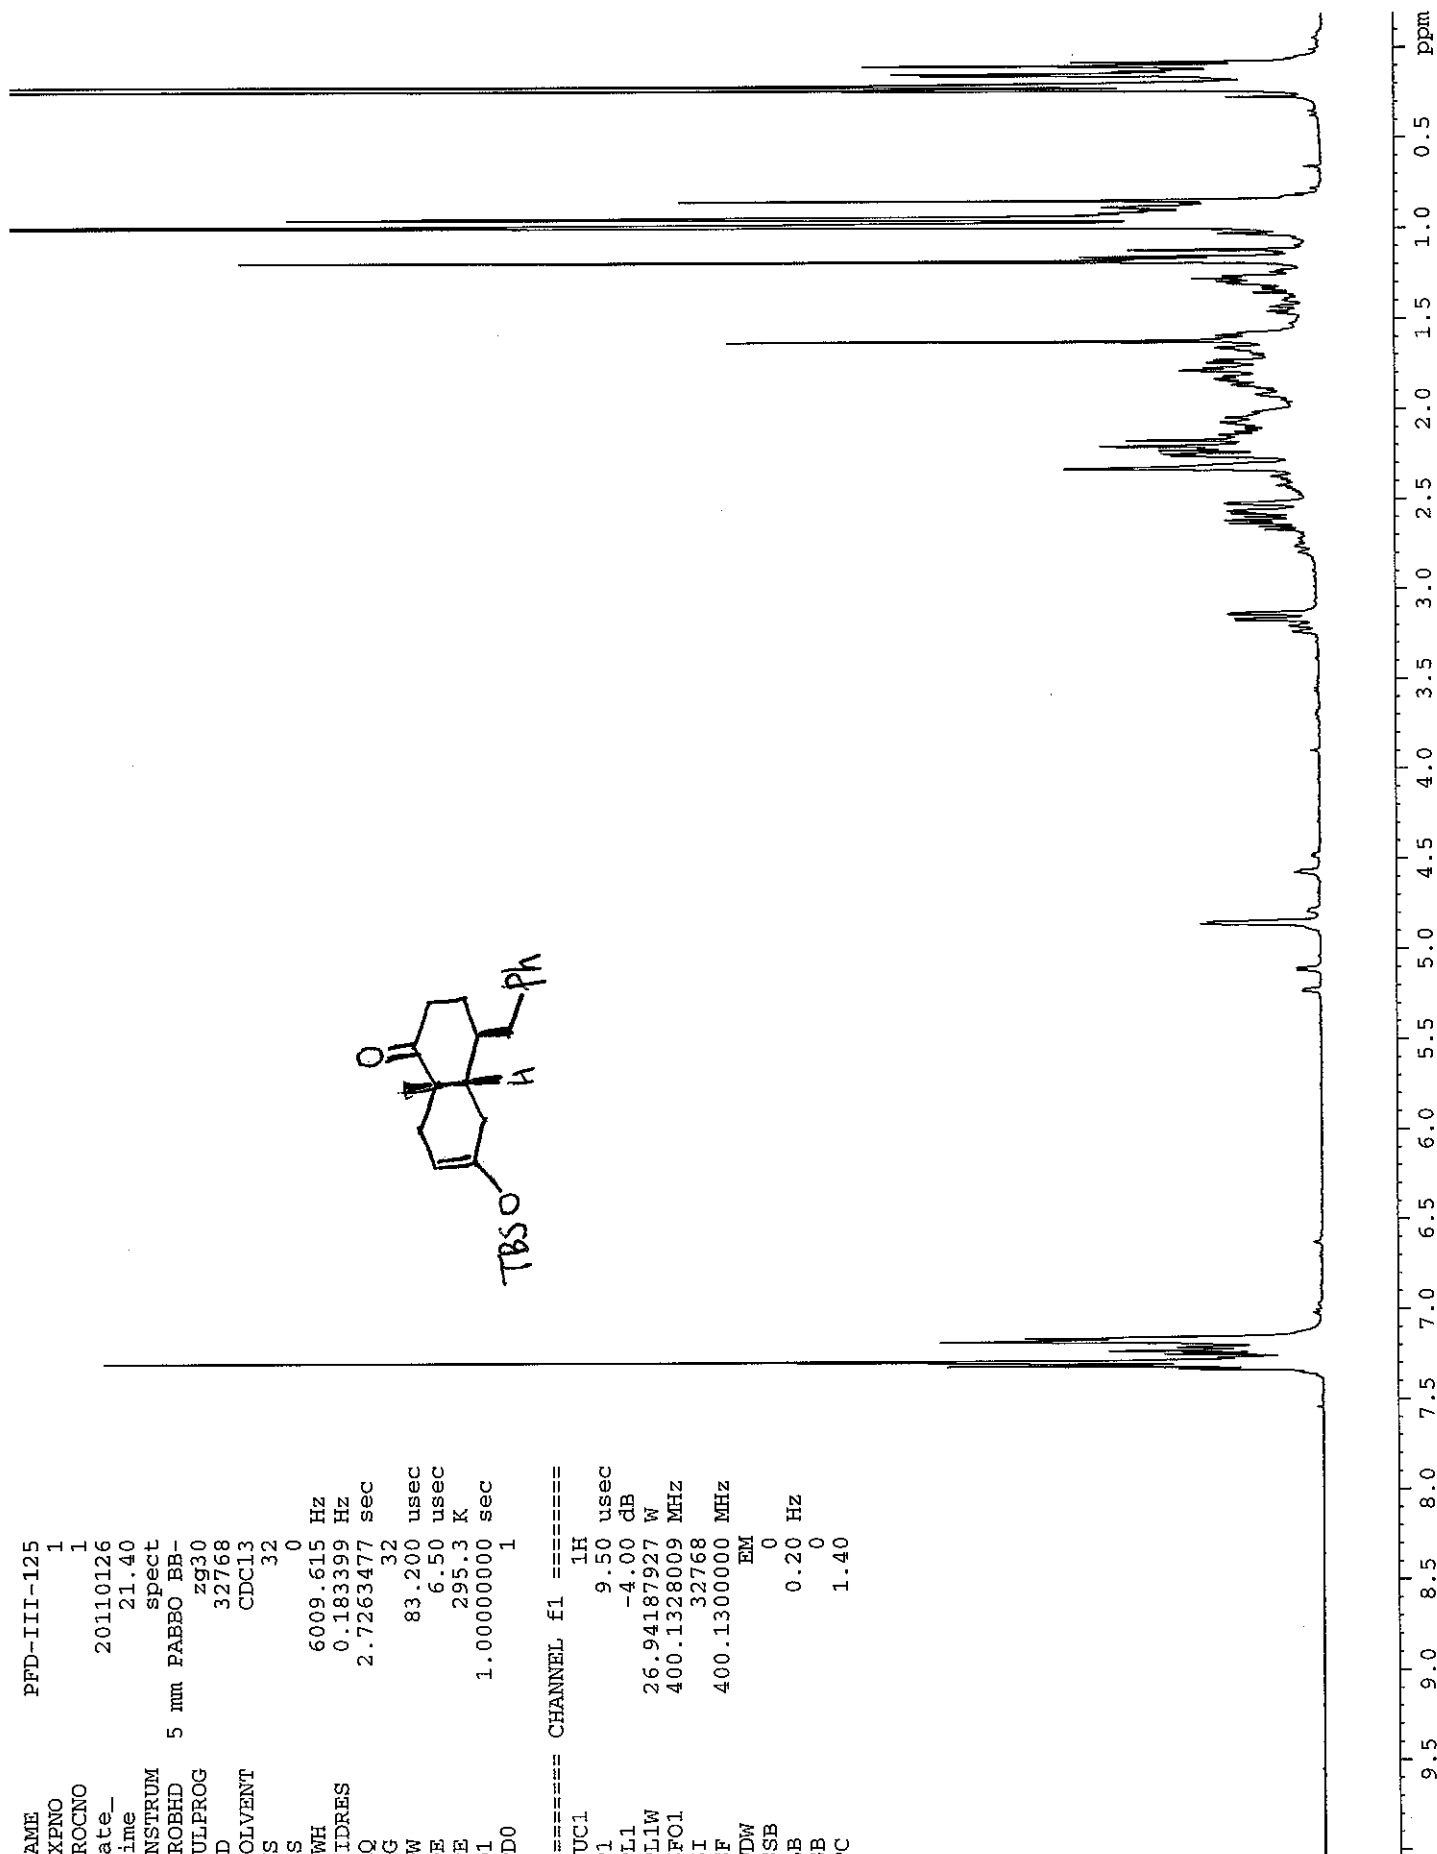

NAME PFD-III-125  
 EXPNO 2  
 PROCNO 1  
 Date\_ 20110126  
 Time 21.49  
 INSTRUM spect  
 PROBHD 5 mm PABBO BB-  
 PULPROG zgpg30  
 TD 32768  
 SOLVENT CDC13  
 NS 442  
 DS 0  
 SWH 28409.092 Hz  
 FIDRES 0.866977 Hz  
 AQ 0.5767668 sec  
 RG 1820  
 DW 17.600 usec  
 DE 6.50 usec  
 TE 296.0 K  
 D1 0.69999999 sec  
 D11 0.03000000 sec  
 TD0 1

==== CHANNEL f1 =====  
 NUC1 13C  
 P1 8.50 usec  
 PL1 3.20 dB  
 PL1W 49.53329468 W  
 SFO1 100.6228298 MHz

==== CHANNEL f2 =====  
 CPDPRG2 waltz16  
 NUC2 1H  
 PCPD2 80.00 usec  
 PL2 -4.00 dB  
 PL12 14.60 dB  
 PL13 14.60 dB  
 PL2W 26.94187927 W  
 PL12W 0.37190142 W  
 PL13W 0.37190142 W  
 SFO2 400.1316005 MHz  
 SI 32768  
 SF 100.6127717 MHz  
 WDW EM  
 SSB 0  
 LB 1.00 Hz  
 GB 0  
 PC 1.40

147.651  
 140.138  
 129.192  
 128.317  
 126.041  
 100.112  
 77.318  
 77.000  
 76.683  
 47.030  
 46.981  
 40.288  
 36.846  
 36.294  
 31.484  
 31.113  
 28.755  
 25.704  
 20.013  
 18.020  
 4.198  
 4.314

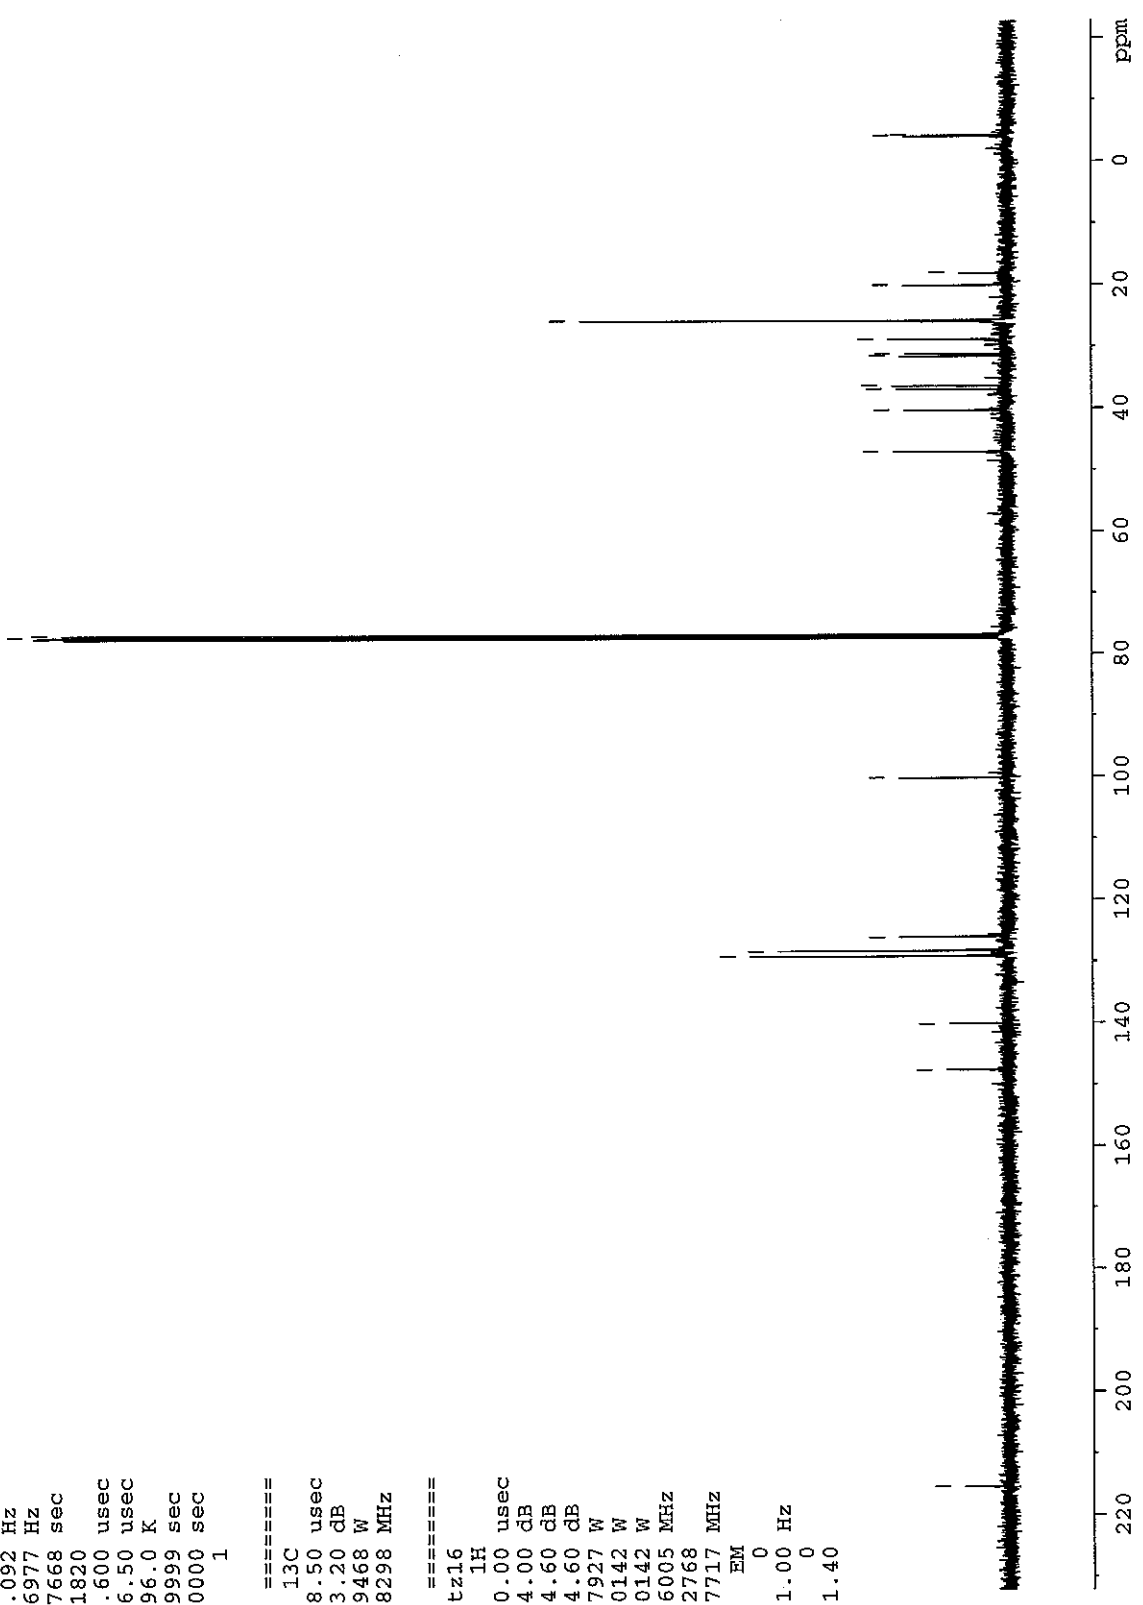

proton

NAME PFD-III-126  
EXPNO 1  
PROCNO 1  
Date\_ 20110128  
Time 13.04  
INSTRUM spect  
PROBHD 5 mm PABBO BB-  
PULPROG zg30  
TD 32768  
SOLVENT CDCl3  
NS 32  
DS 0  
SWH 6009.615 Hz  
FIDRES 0.183399 Hz  
AQ 2.7263477 sec  
RG 32  
DW 83.200 usec  
DE 6.50 usec  
TE 298.8 K  
D1 1.00000000 sec  
TD0 1

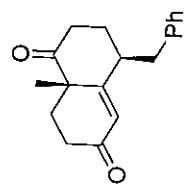

==== CHANNEL f1 =====  
NUC1 1H  
P1 9.50 usec  
PL1 -4.00 dB  
PL1W 26.94187927 W  
SFO1 400.1328009 MHz  
SI 32768  
SF 400.1300090 MHz  
WDW EM  
SSB 0  
LB 0.20 Hz  
GB 0  
PC 1.40

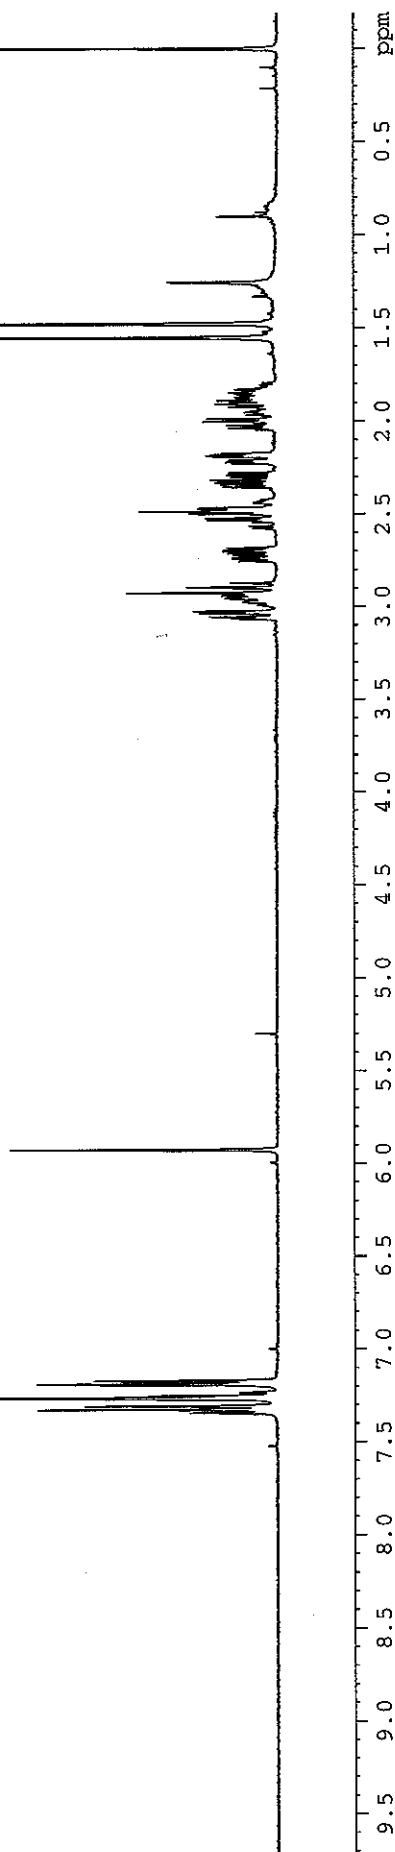

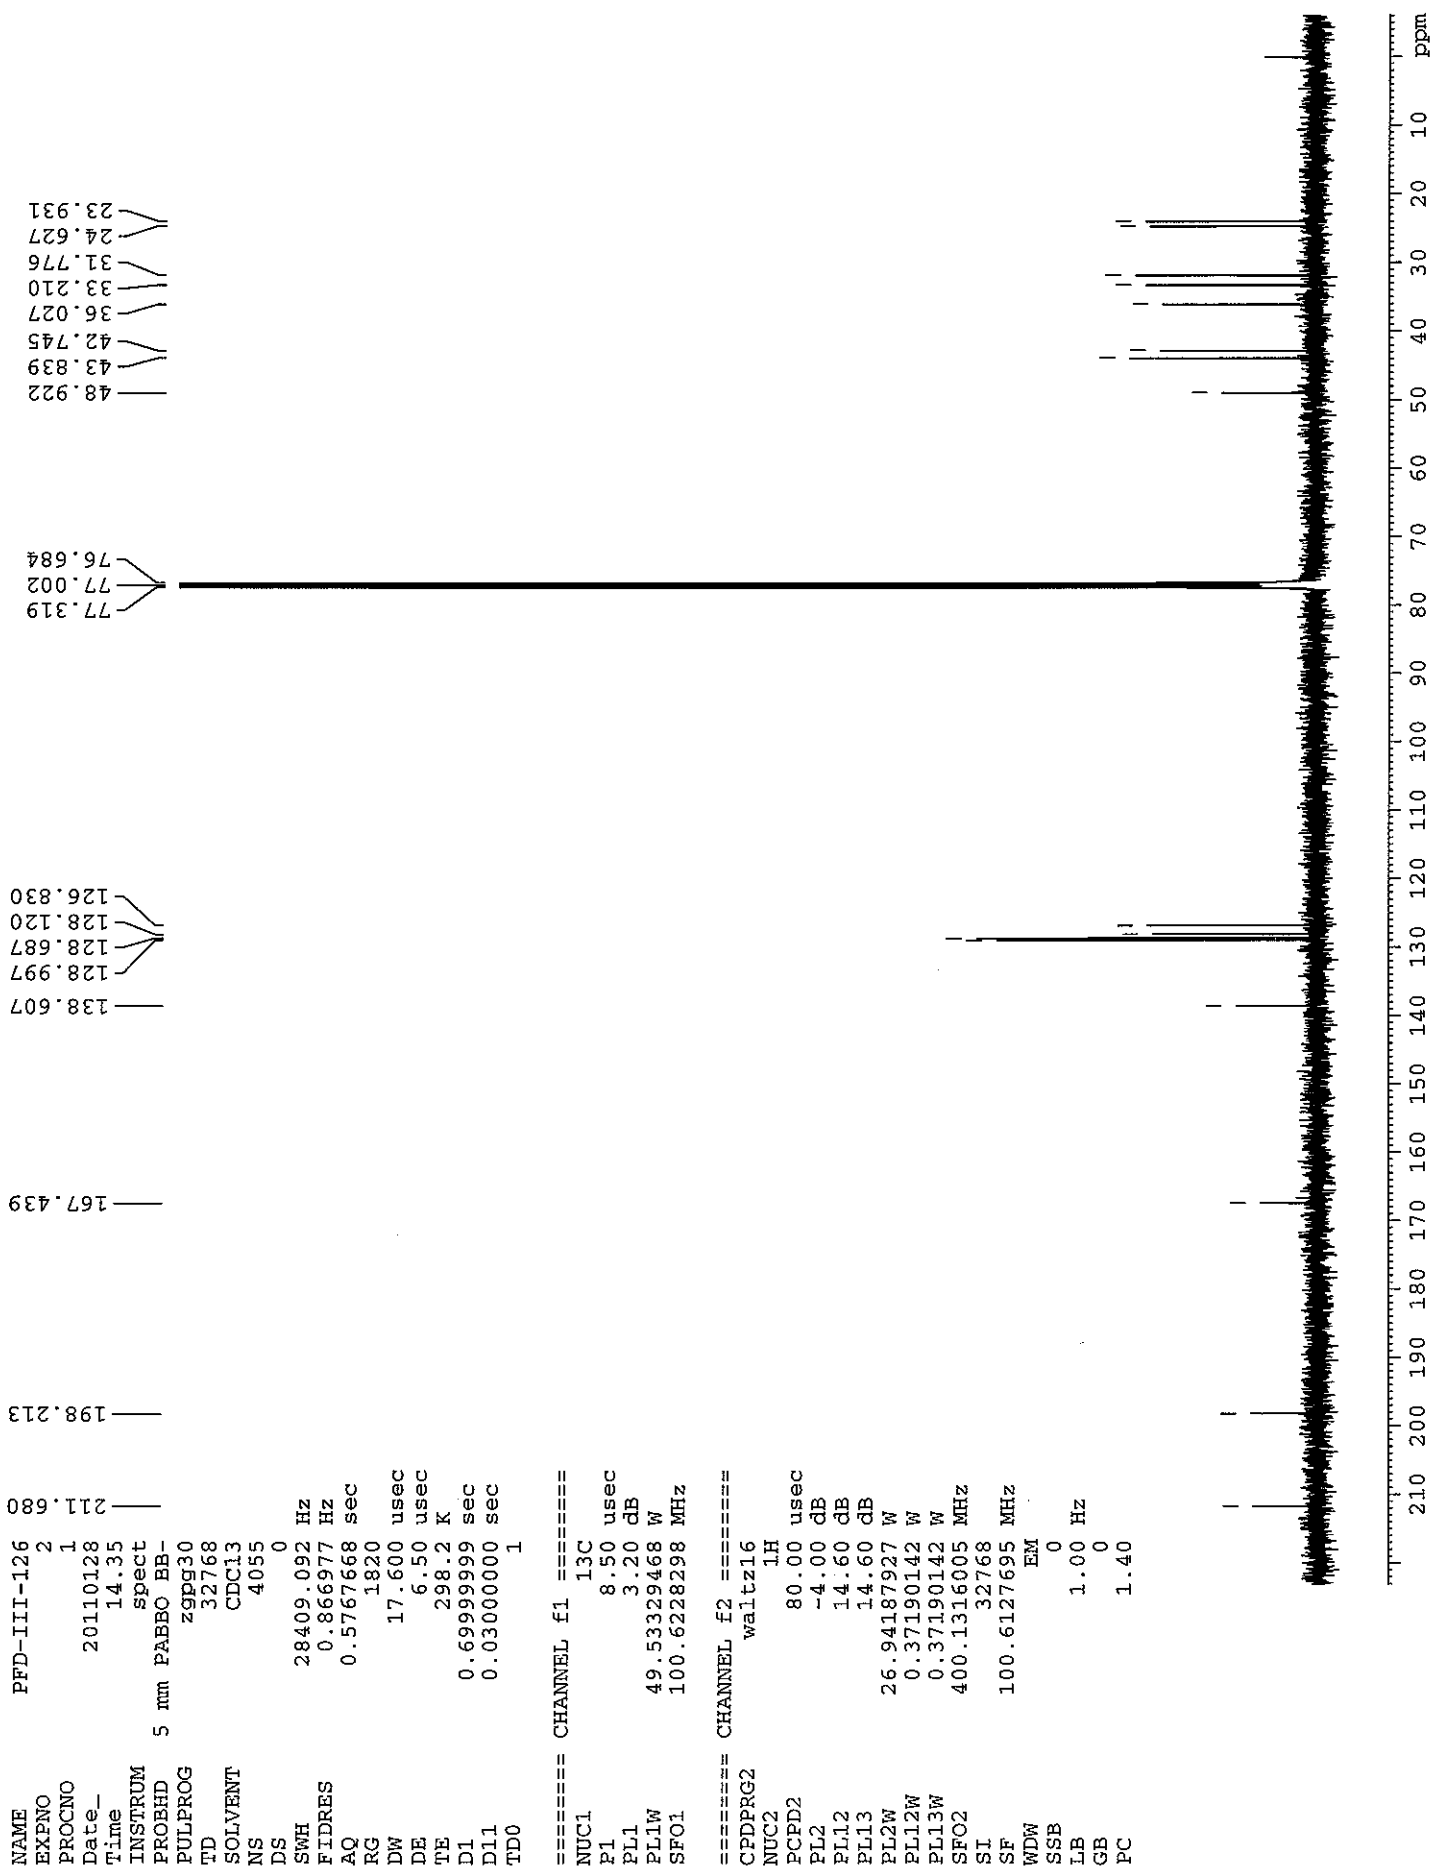

NAME PFD-III-111-R2  
EXPNO 1  
PROCNO 1  
Date\_ 20110126  
Time 21.21  
INSTRUM spect  
PROBHD 5 mm PABBO BB-  
FULPROG zg30  
TD 32768  
SOLVENT CDCl3  
NS 32  
DS 0  
SWH 6009.615 Hz  
FIDRES 0.183399 Hz  
AQ 2.7263477 sec  
RG 32  
DW 83.200 usec  
DE 6.50 usec  
TE 295.2 K  
D1 1.00000000 sec  
TD0 1

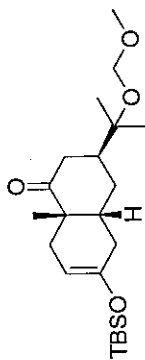

==== CHANNEL f1 =====  
NUC1 1H  
P1 9.50 usec  
PL1 -4.00 dB  
PL1W 26.94187927 W  
SF01 400.1328009 MHz  
SI 32768  
SF 400.1300091 MHz  
WDW EM  
SSB 0  
LB 0.20 Hz  
GB 0  
PC 1.00

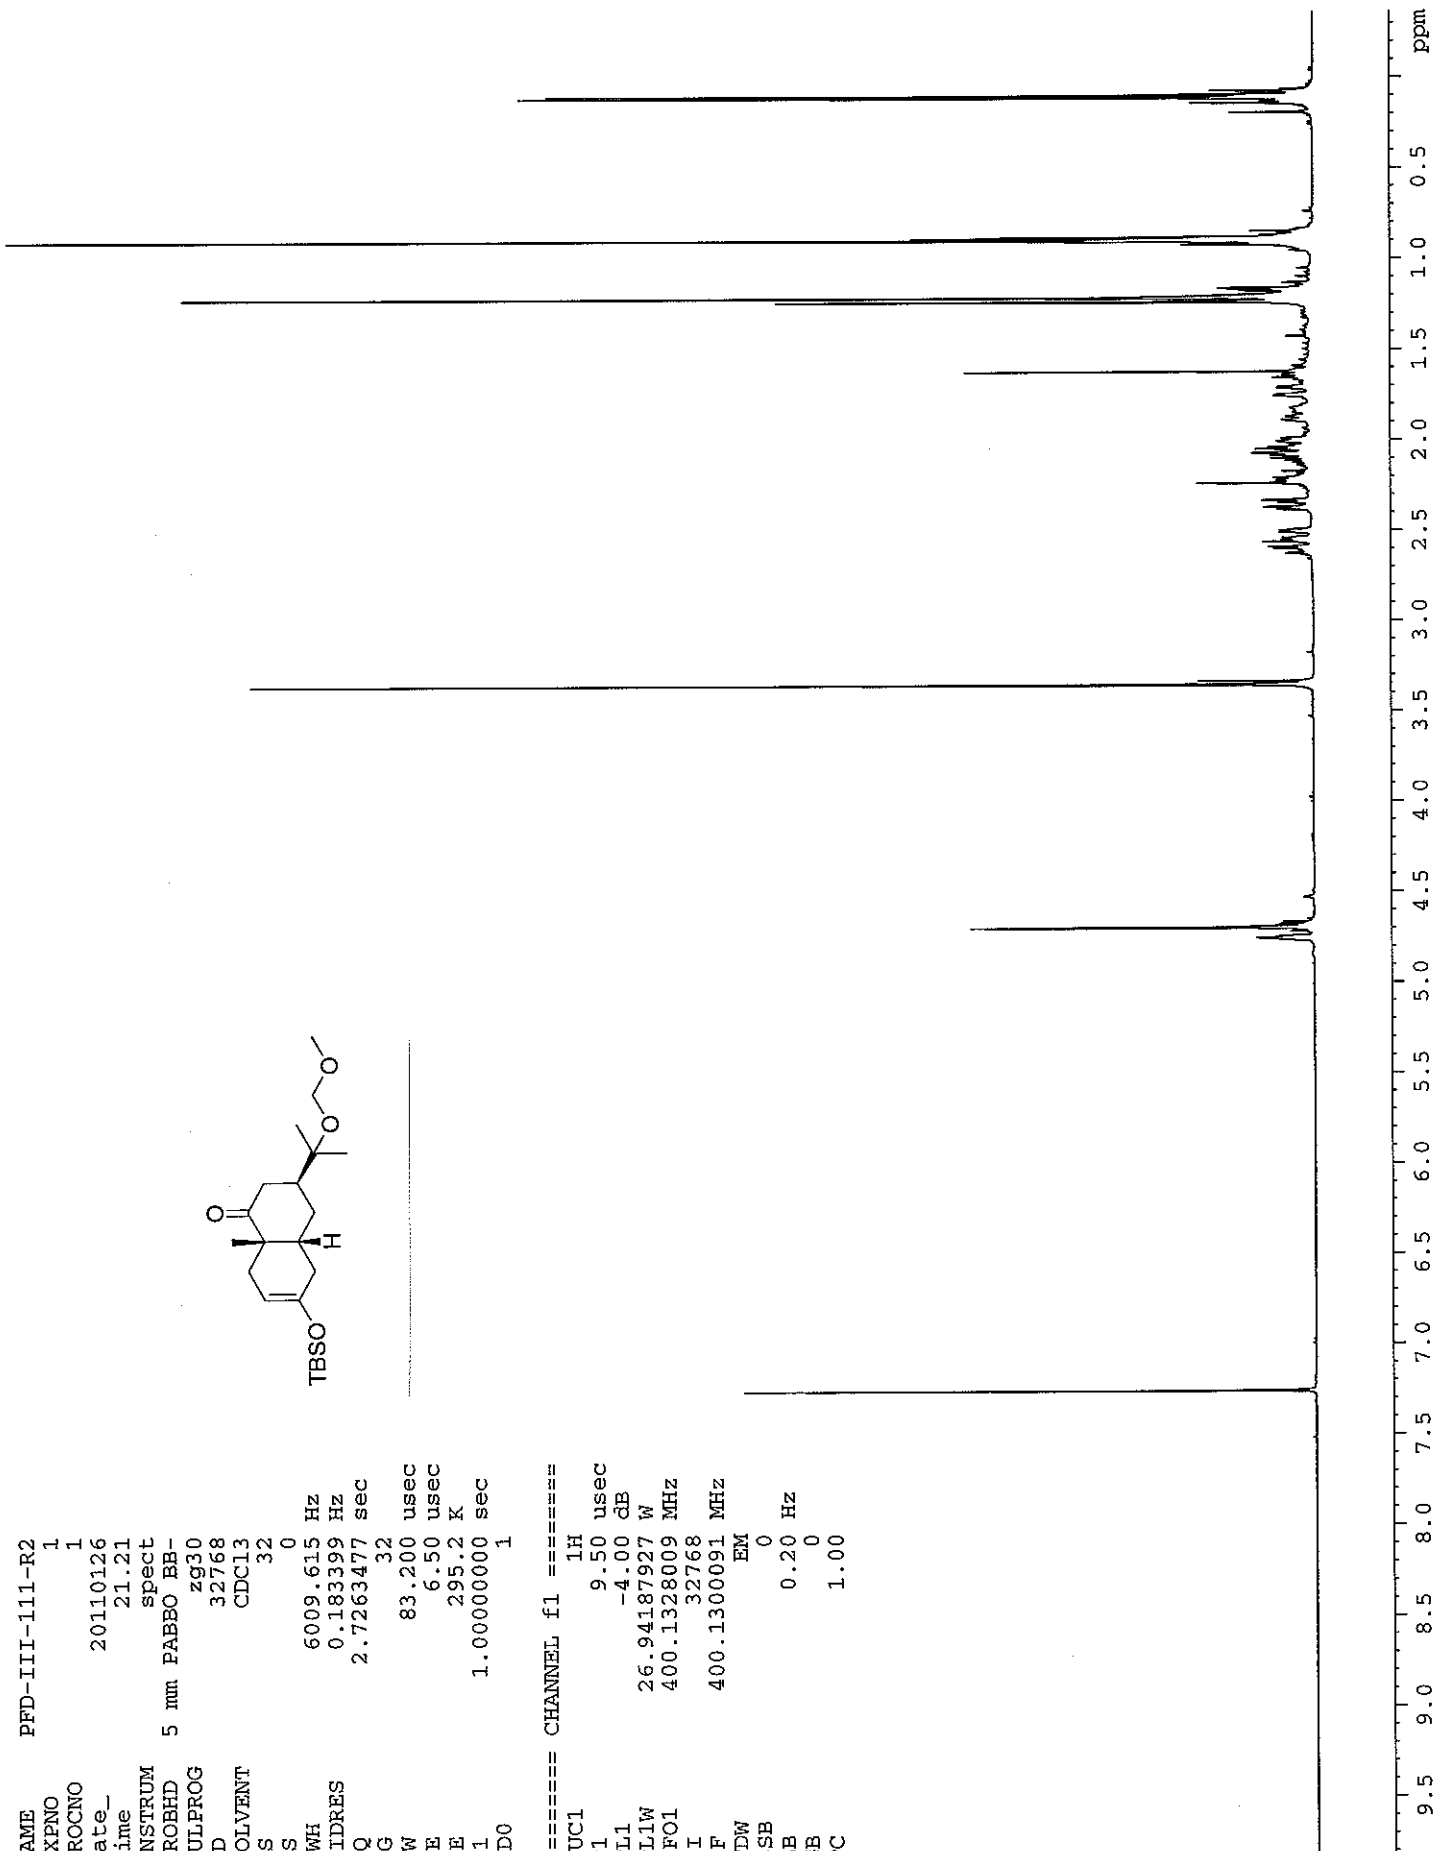

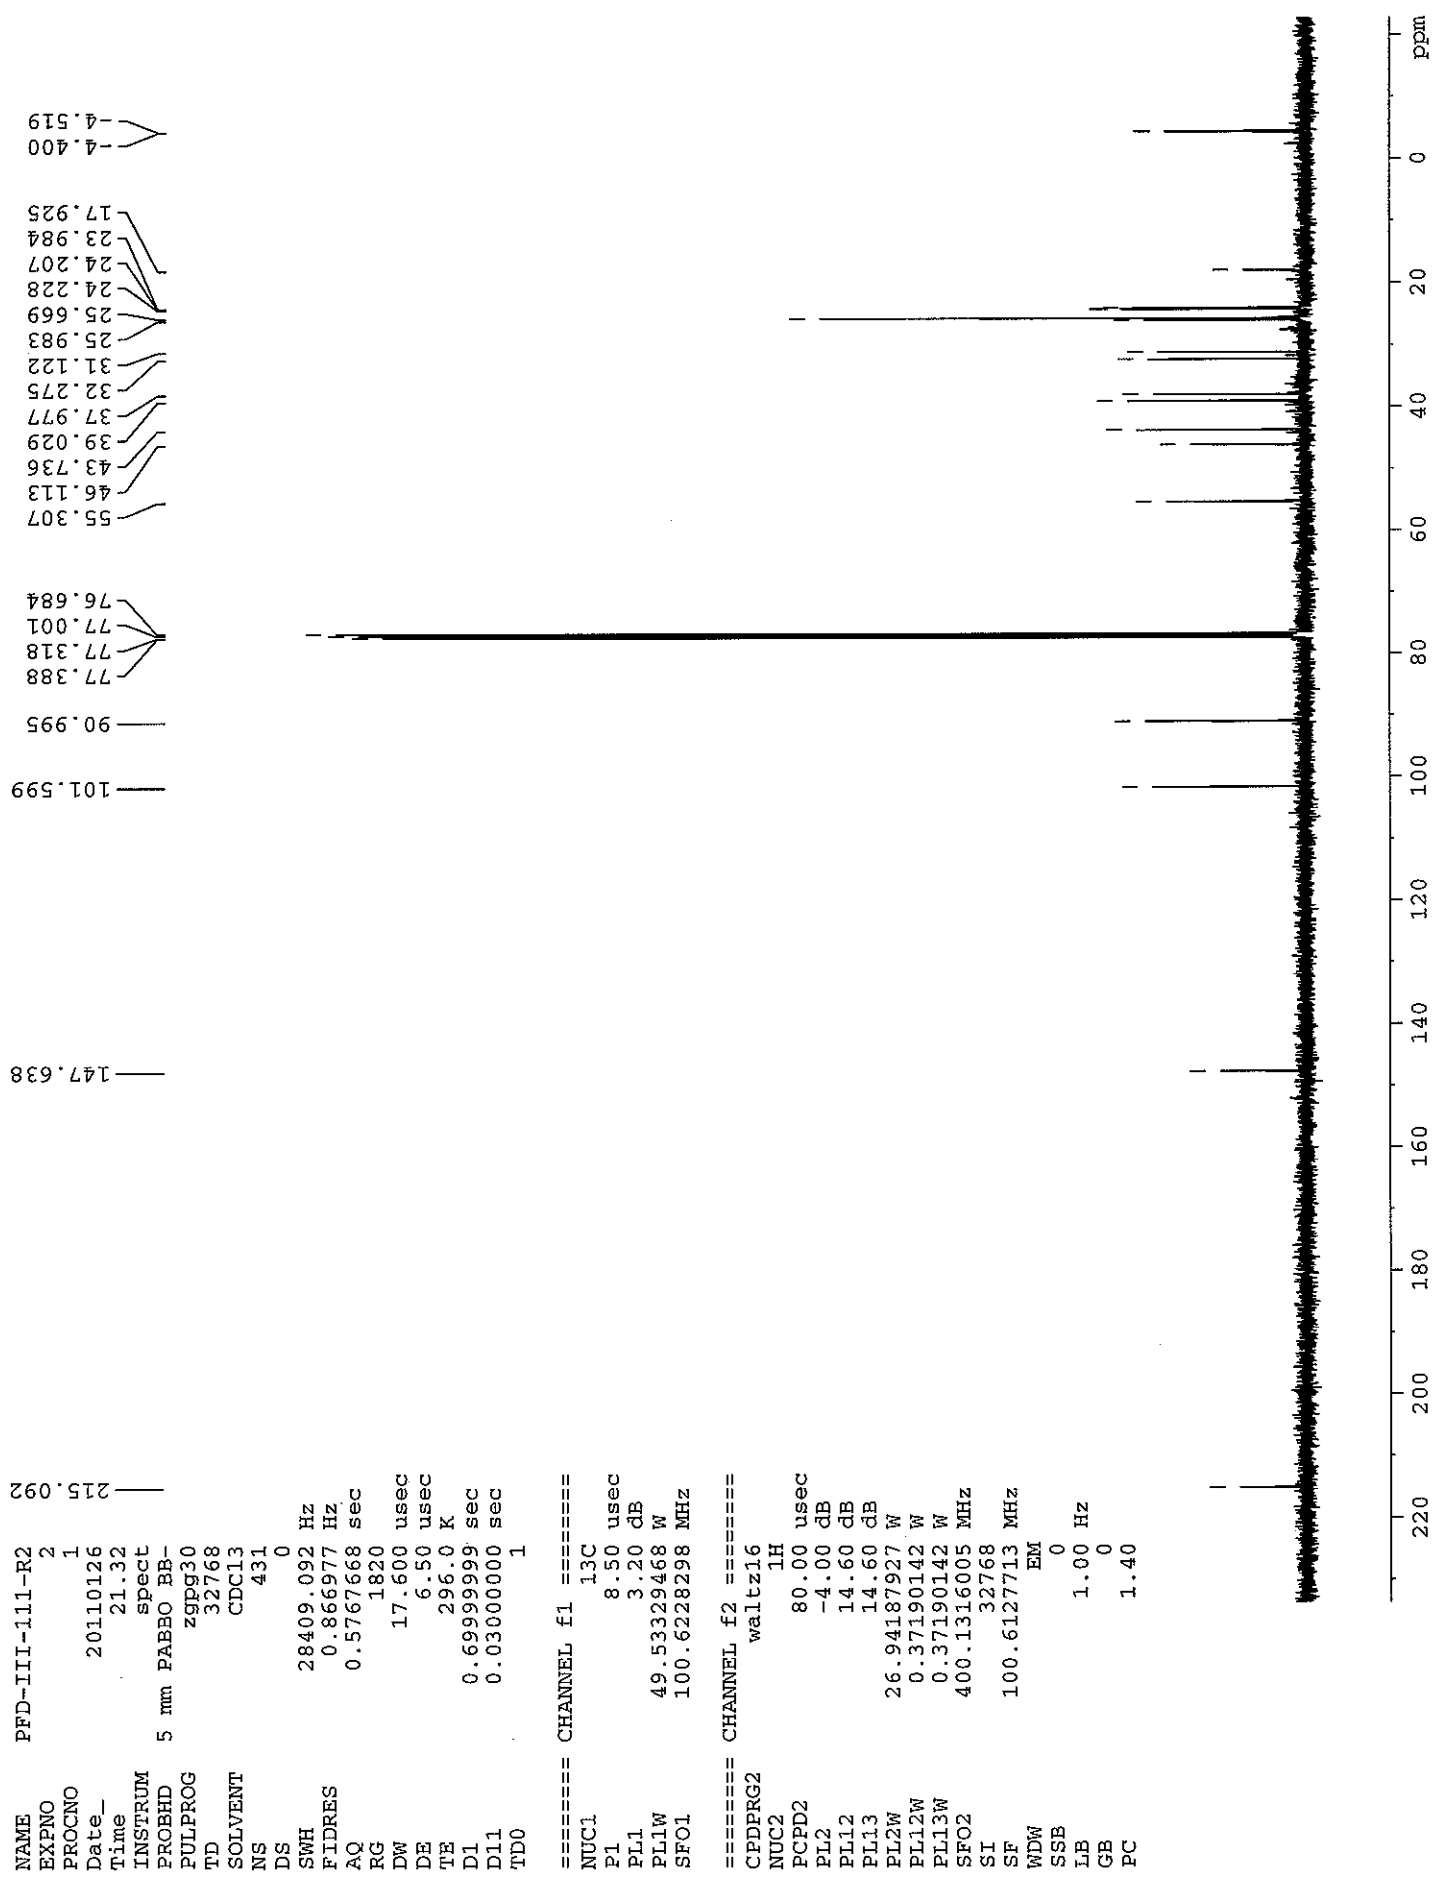



NAME PFD-III-111-R2  
EXPNO 1  
PROCNO 1  
Date\_ 20110127  
Time 14.13  
INSTRUM spect  
PROBHD 5 mm PABBI 1H/  
PULPROG zg30  
TD 32768  
SOLVENT CDCl3  
NS 25  
DS 0  
SWH 6009.615 Hz  
FIDRES 0.183399 Hz  
AQ 2.7263477 sec  
RG 28.5  
DW 83.200 usec  
DE 6.50 usec  
TE 300.1 K  
D1 1.0000000 sec  
TD0 1

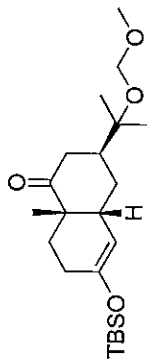

==== CHANNEL f1 =====  
NUC1 1H  
P1 7.25 usec  
PL1 0.00 dB  
PL1W 12.20776844 W  
SFO1 399.9225995 MHz  
SI 32768  
SF 399.9200114 MHz  
WDW EM  
SSB 0  
LB 0.20 Hz  
GB 0  
PC 1.00

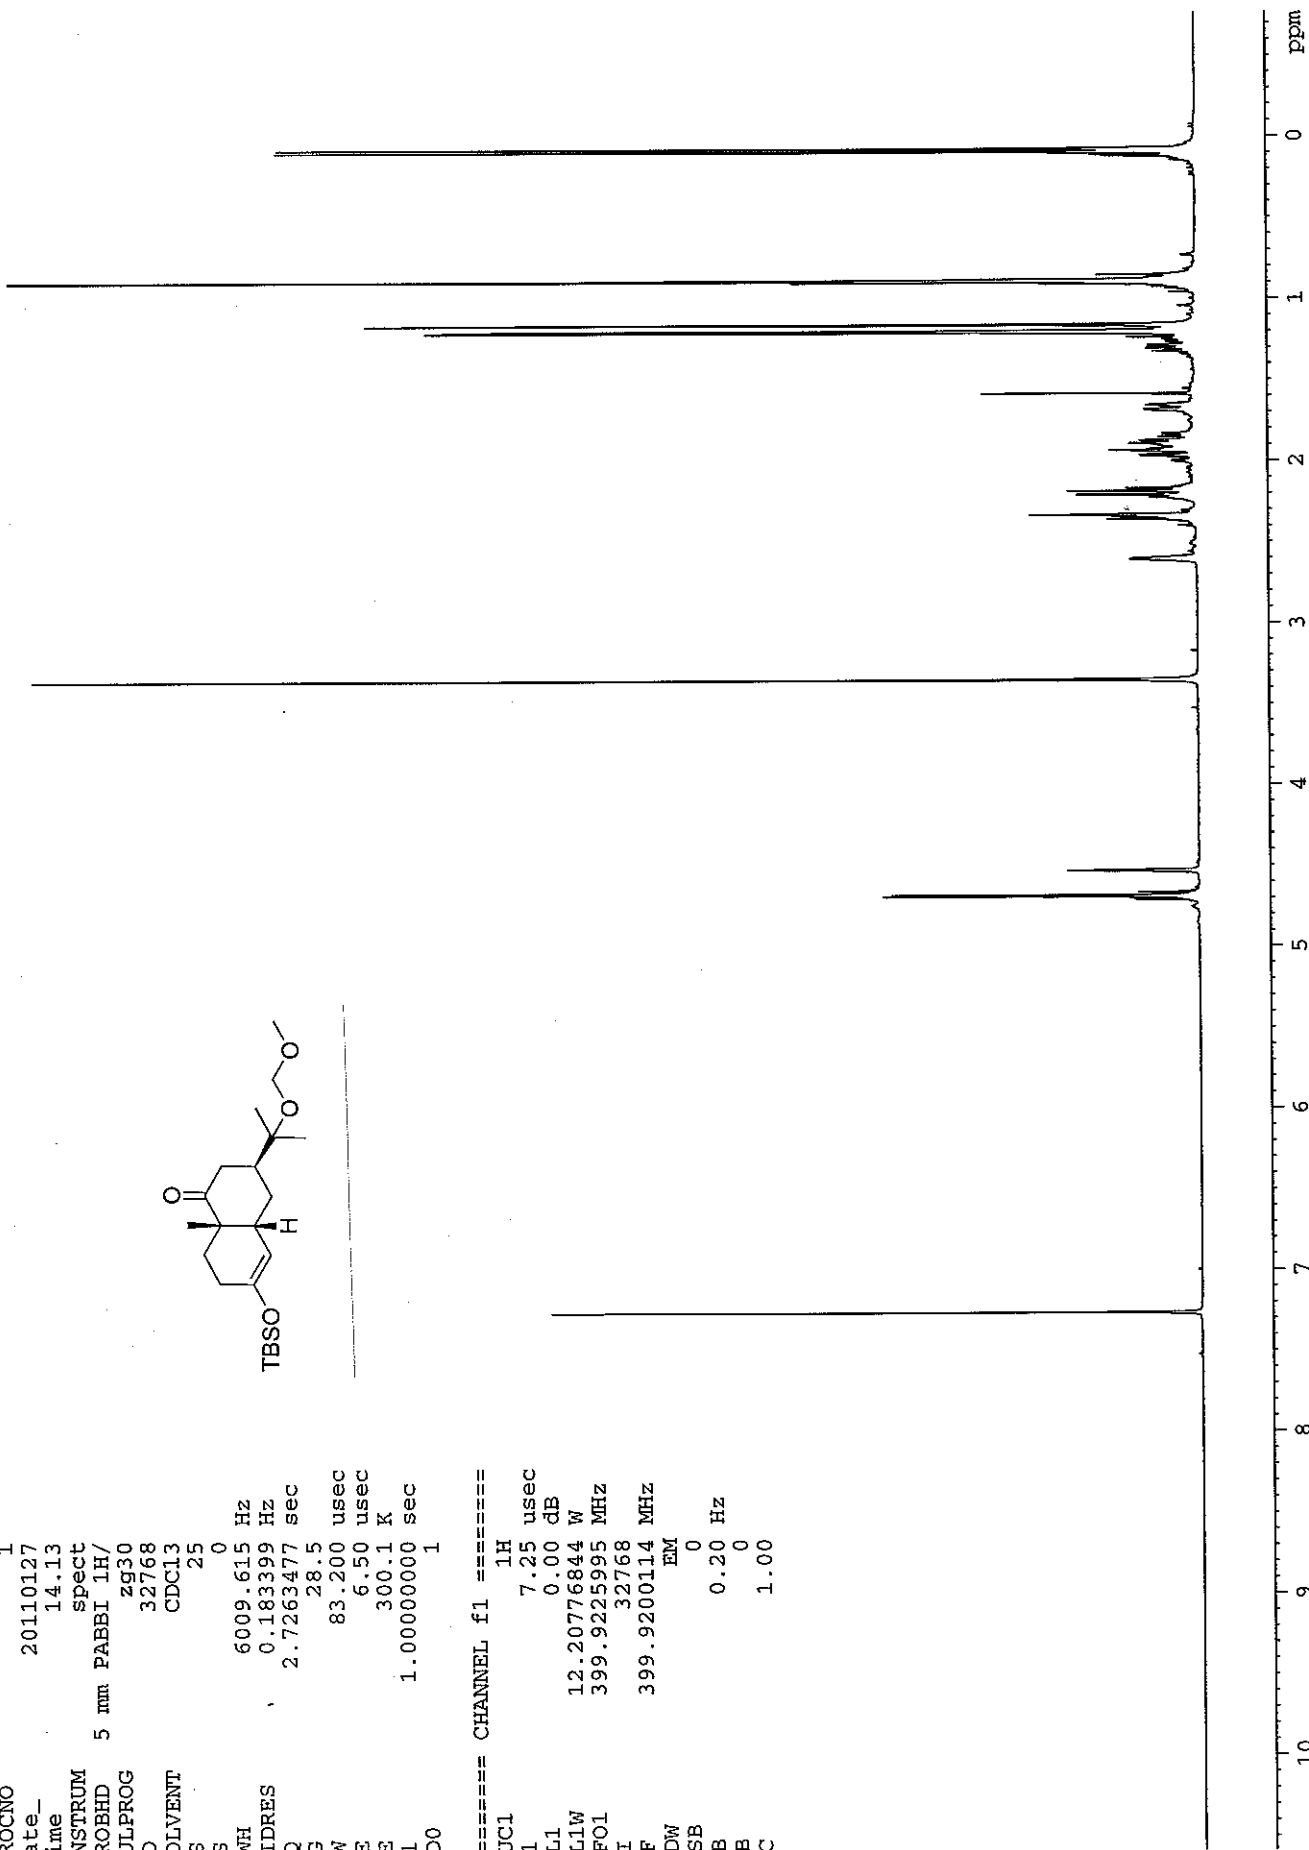

NAME PFD-III-111-R2-2  
 EXPNO 2  
 PROCNO 1  
 Date\_ 20110127  
 Time 16.56  
 INSTRUM spect  
 PROBHD 5 mm PABBO BB-  
 PULPROG zgpg30  
 TD 32768  
 SOLVENT CDCl3  
 NS 1001  
 DS 0  
 SWH 28409.092 Hz  
 FIDRES 0.866977 Hz  
 AQ 0.5767668 sec  
 RG 1820  
 DW 17.600 usec  
 DE 6.50 usec  
 TE 295.6 K  
 D1 0.69999999 sec  
 D11 0.03000000 sec  
 TD0 1

==== CHANNEL f1 =====  
 NUC1 13C  
 P1 8.50 usec  
 PL1 3.20 dB  
 PL1W 49.53329468 W  
 SFO1 100.6228298 MHz

==== CHANNEL f2 =====  
 CPDPRG2 waltz16  
 NUC2 1H  
 PCPD2 80.00 usec  
 PL2 -4.00 dB  
 PL12 14.60 dB  
 PL13 14.60 dB  
 PL2W 26.94187927 W  
 PL12W 0.37190142 W  
 PL13W 0.37190142 W  
 SFO2 400.1316005 MHz  
 SI 32768  
 SF 100.6127712 MHz  
 WDW EM  
 SSB 0  
 LB 1.00 Hz  
 GB 0  
 PC 1.40

152.291  
 108.259  
 90.776  
 77.317  
 77.000  
 76.884  
 76.683  
 55.148  
 45.936  
 44.184  
 41.677  
 39.760  
 31.753  
 28.188  
 27.212  
 25.625  
 25.478  
 24.047  
 23.967  
 17.970  
 -4.259  
 -4.430

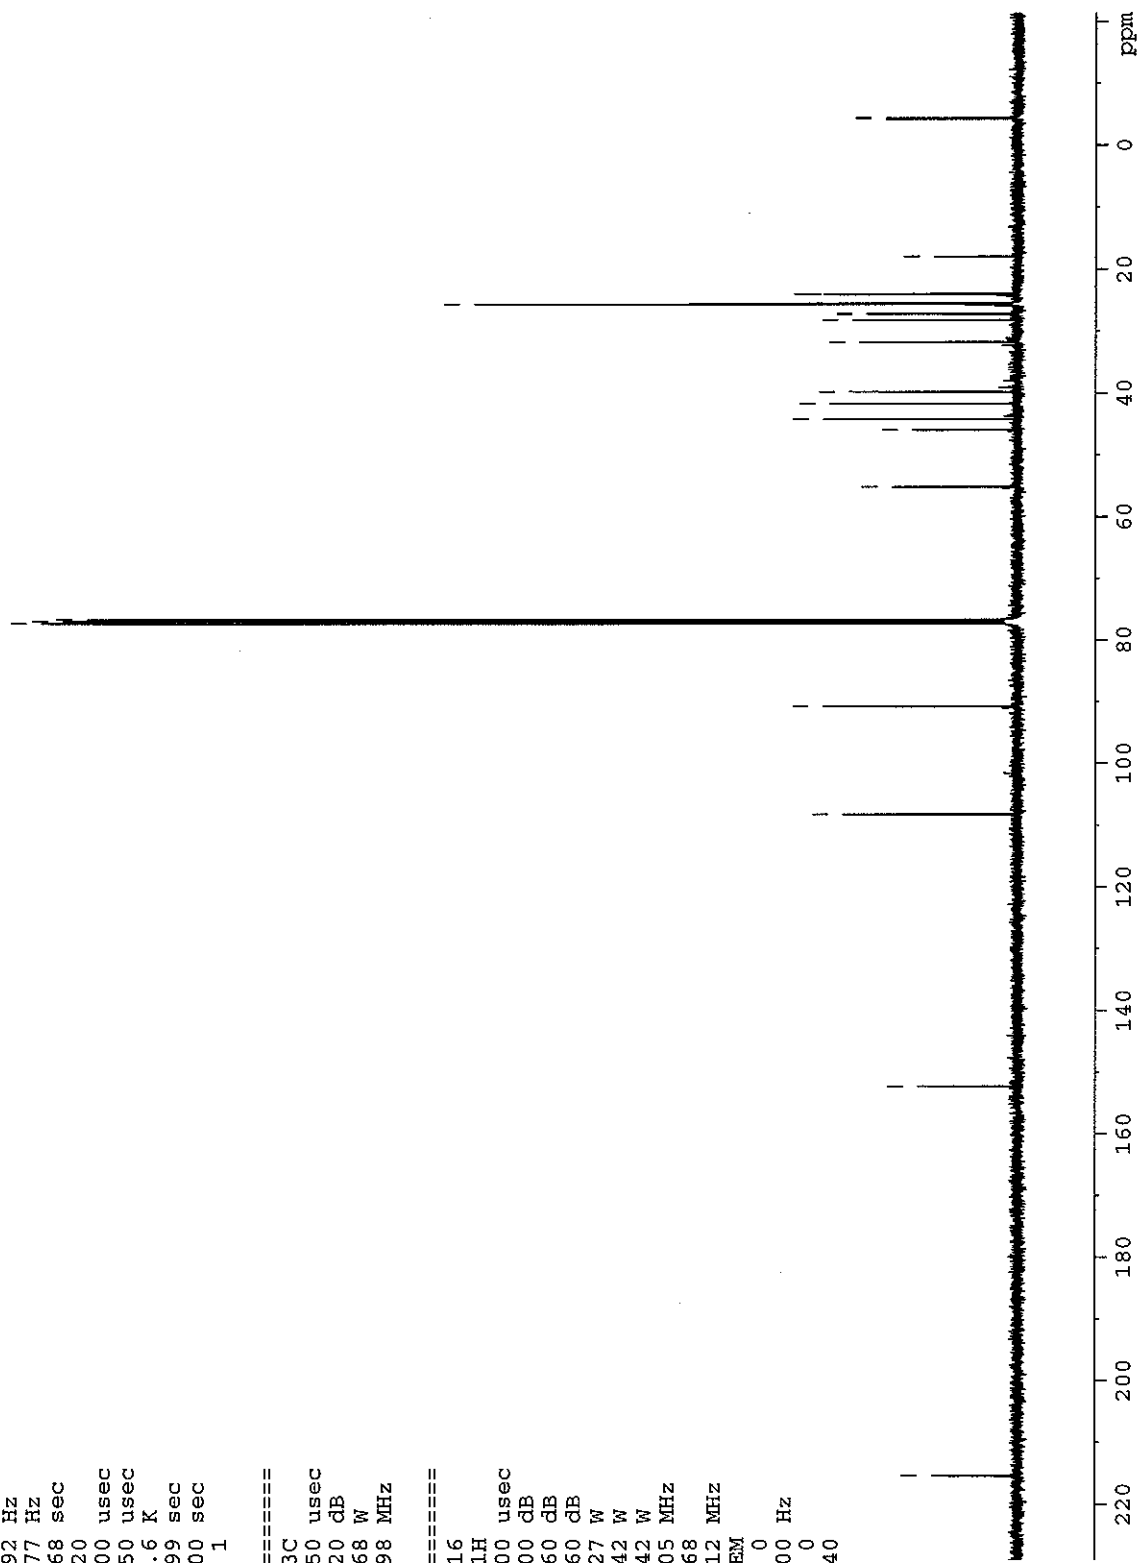

PFD-III-117  
 NAME  
 EXPNO 1  
 PROCNO 1  
 Date\_ 20101229  
 Time 12.00  
 INSTRUM spect  
 PROBHD 5 mm PABBO BB-  
 PULPROG zg30  
 TD 32768  
 SOLVENT CDCl3  
 NS 32  
 DS 0  
 SWH 6009.615 Hz  
 FIDRES 0.183399 Hz  
 AQ 2.7263477 sec  
 RG 32  
 DW 83.200 usec  
 DE 6.50 usec  
 TE 298.2 K  
 D1 1.00000000 sec  
 TD0 1

==== CHANNEL f1 =====  
 NUC1 1H  
 P1 9.50 usec  
 PL1 -4.00 dB  
 PL1W 26.94187927 W  
 SFO1 400.1328009 MHz  
 SI 32768  
 SF 400.1300092 MHz  
 WDW EM  
 SSB 0  
 LB 0.20 Hz  
 GB 0  
 PC 1.00

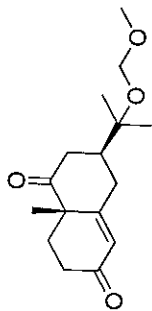

4.727  
 4.724  
 3.374  
 2.729  
 2.698  
 2.691  
 2.660  
 2.650  
 2.646  
 2.620  
 2.616  
 2.606  
 2.602  
 2.595  
 2.591  
 2.569  
 2.558  
 2.481  
 2.469  
 2.467  
 2.465  
 2.453  
 2.441  
 2.170  
 2.129  
 2.126  
 2.113  
 2.108  
 2.094  
 1.879  
 1.442  
 1.280  
 1.253

5.899  
 5.895

7.260

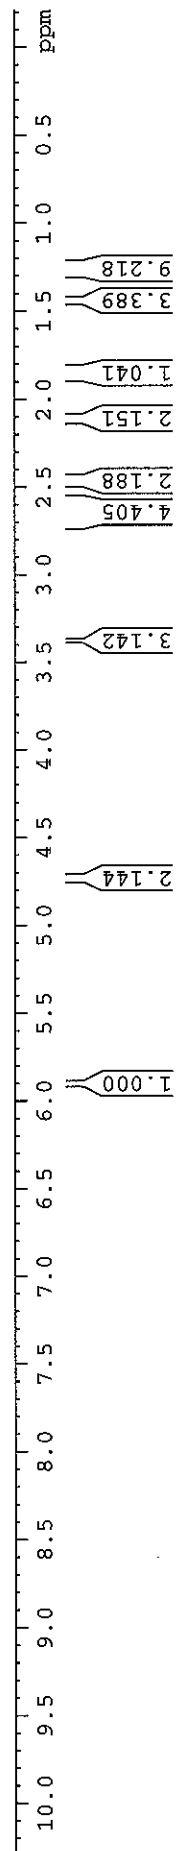

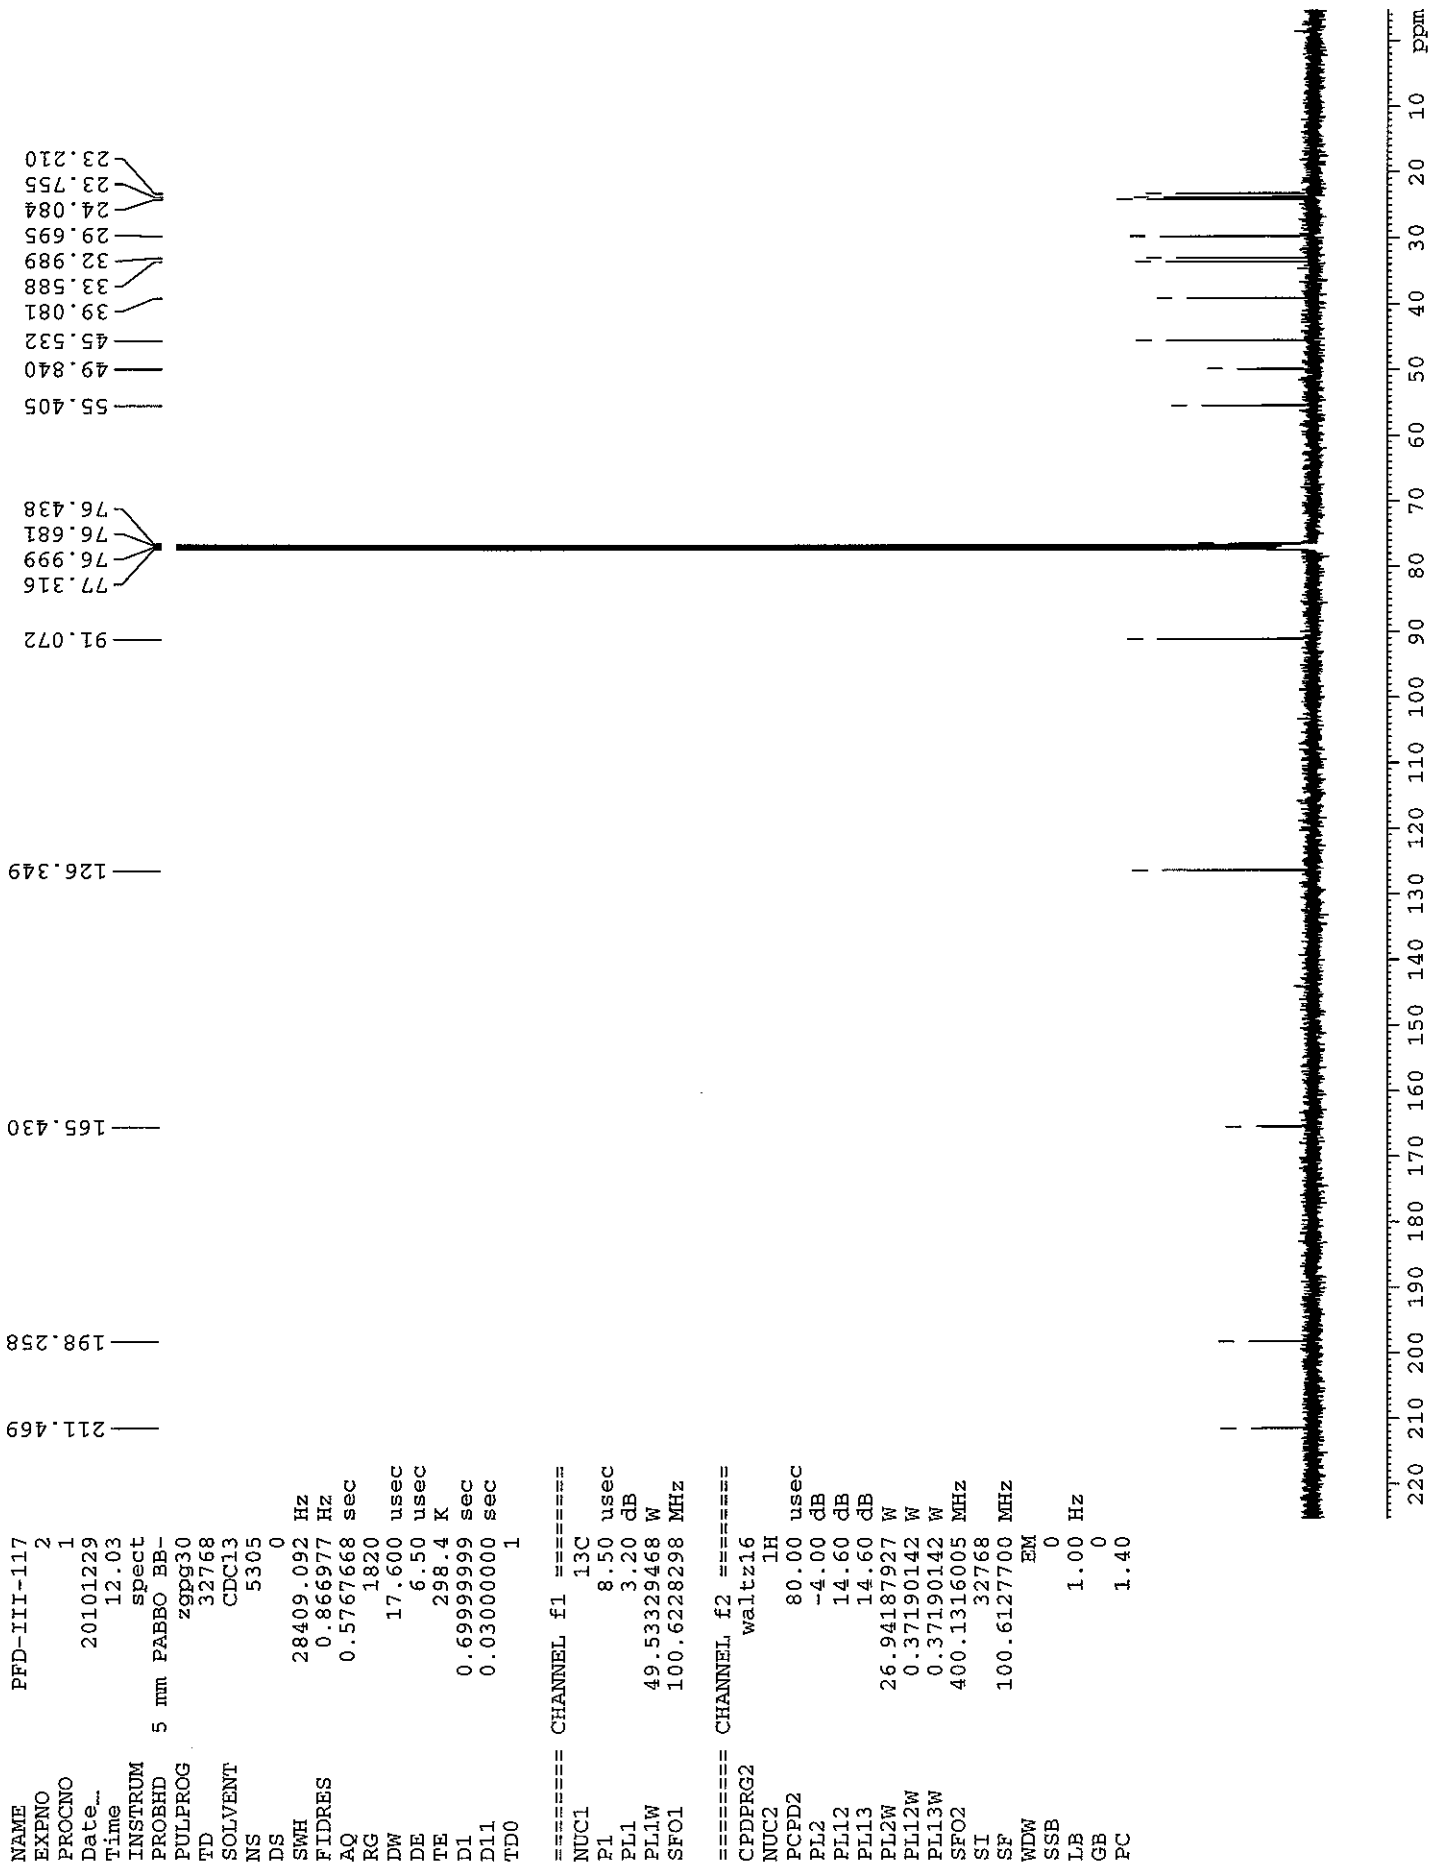

NAME PFD-III-113  
EXPNO 1  
PROCNO 1  
Date\_ 20110102  
Time 21.41  
INSTRUM spect  
PROBHD 5 mm PABBO BB-  
PULPROG zg30  
TD 32768  
SOLVENT CDCl3  
NS 32  
DS 0  
SWH 6009.615 Hz  
FIDRES 0.183399 Hz  
AQ 2.7263477 sec  
RG 32  
DW 83.200 usec  
DE 6.50 usec  
TE 298.2 K  
D1 1.00000000 sec  
TD0 1

==== CHANNEL f1 =====  
NUC1 1H  
P1 9.50 usec  
PL1 -4.00 dB  
PL1W 26.94187927 W  
SFO1 400.1328009 MHz  
SI 32768  
SF 400.1300091 MHz  
WDW EM  
SSB 0  
LB 0.20 Hz  
GB 0  
PC 1.40

proton

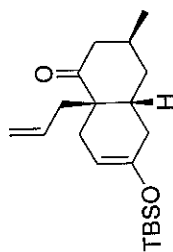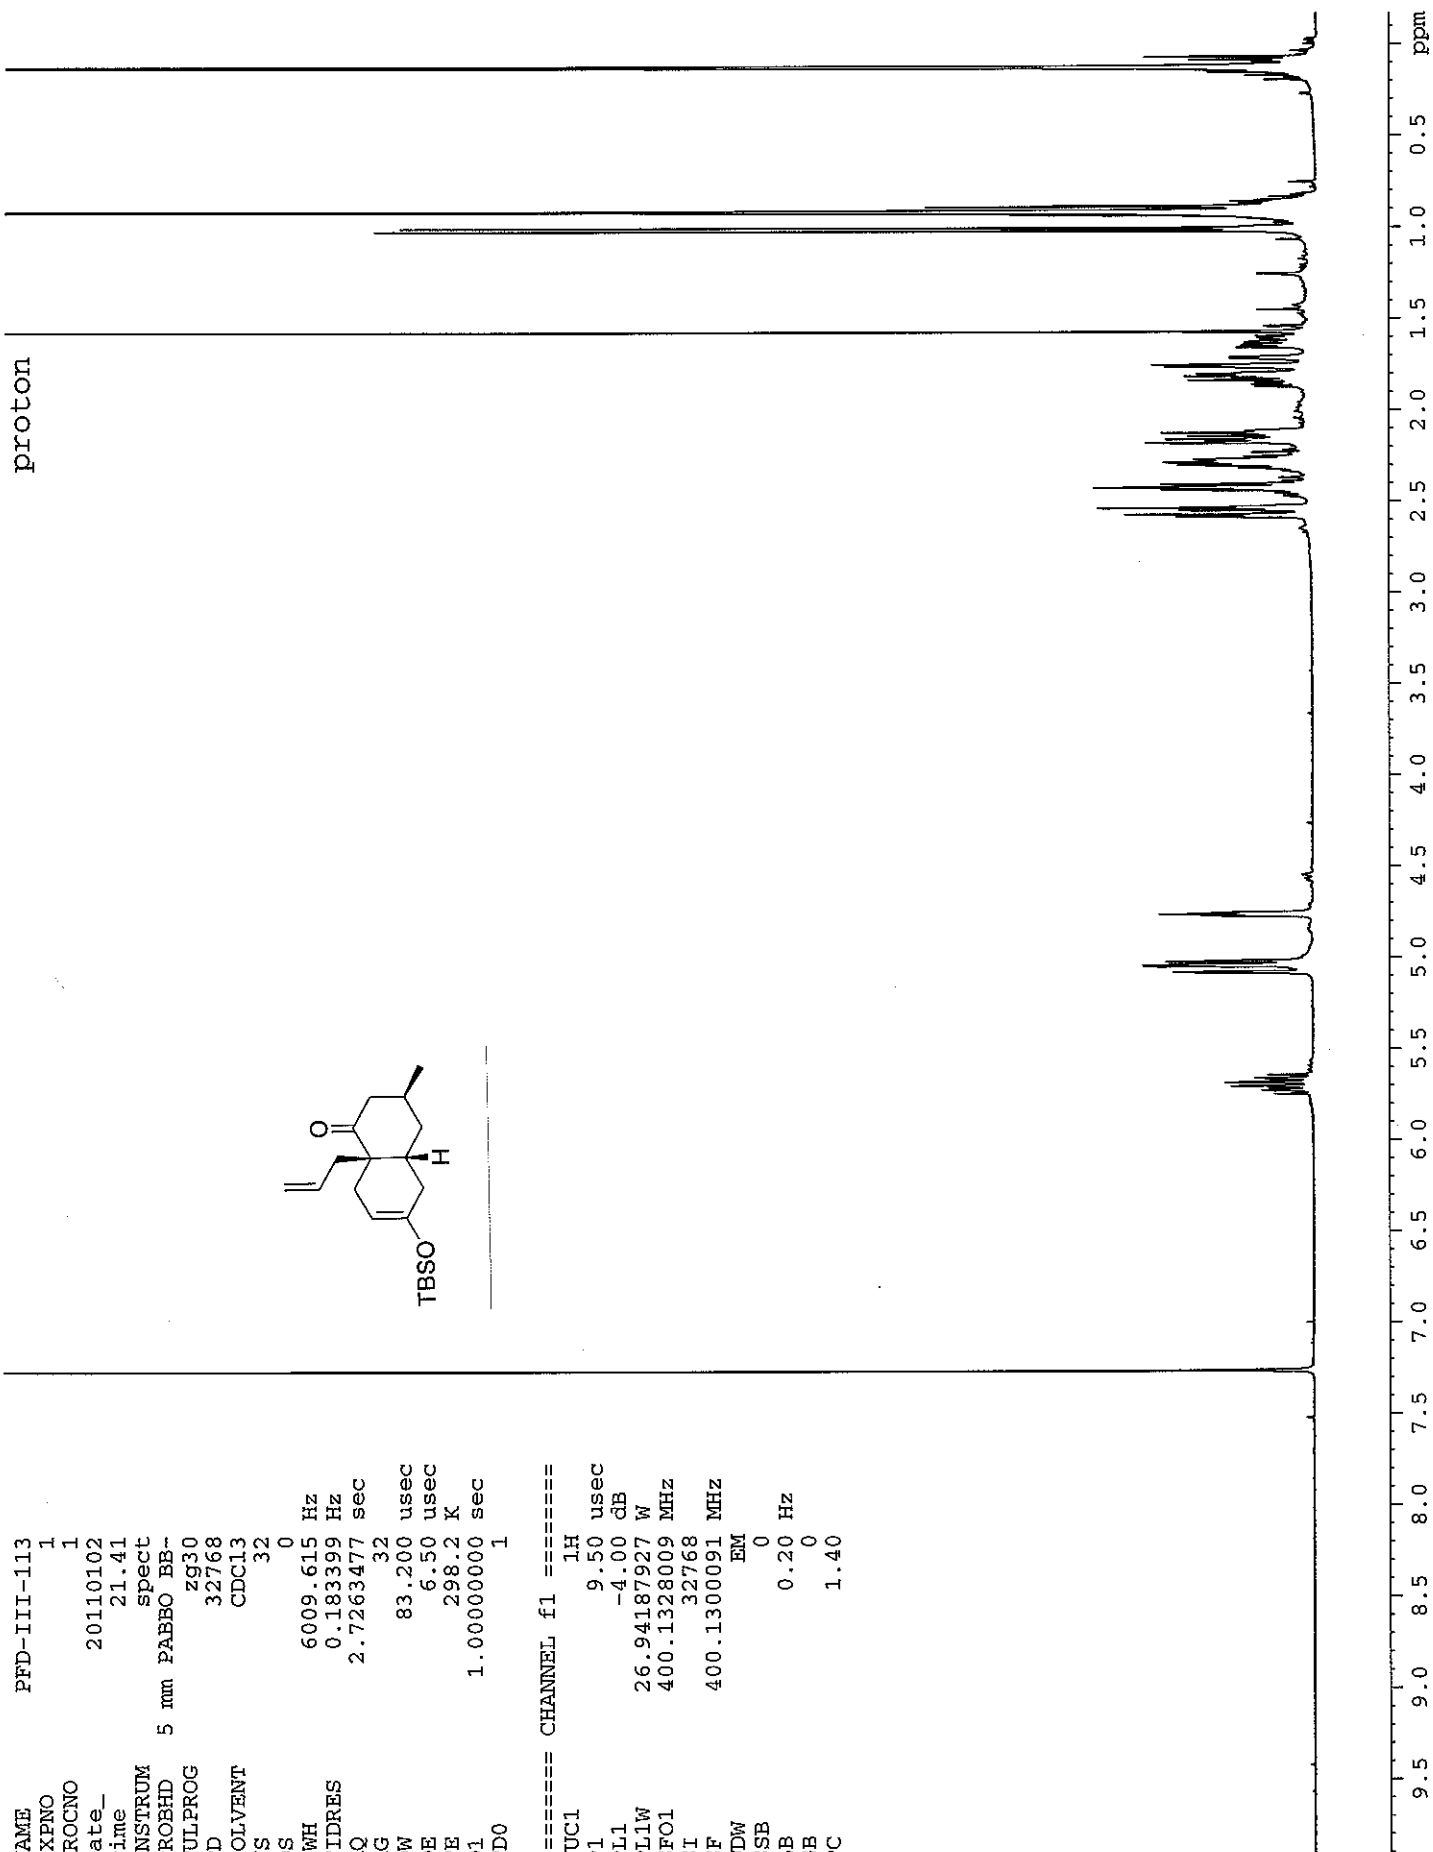

```

NAME      PFD-III-113
EXPNO     2
PROCNO    1
Date_     20110102
Time      21.45
INSTRUM   spect
PROBHD    5 mm PABBO BB-
PULPROG   zgpg30
TD         32768
SOLVENT    CDCl3
NS         1824
DS         0
SWH        28409.092 Hz
FIDRES     0.866977 Hz
AQ         0.5767668 sec
RG         1820
DW         17.600 usec
DE         6.50 usec
TE         298.3 K
D1         0.69999999 sec
D11        0.03000000 sec
TD0        1

===== CHANNEL f1 =====
NUC1       13C
P1         8.50 usec
PL1        3.20 dB
PL1W       49.53329468 W
SF01       100.6228298 MHz

===== CHANNEL f2 =====
CPDPRG2    waltz16
NUC2       1H
PCPD2      80.00 usec
PL2        -4.00 dB
PL12       14.60 dB
PL13       14.60 dB
PL2W       26.94187927 W
PL12W      0.37190142 W
PL13W      0.37190142 W
SF02       400.1316005 MHz
SI         32768
SF         100.6127700 MHz
WDW        EM
SSB        0
LB         1.00 Hz
GB         0
PC         1.40
    
```

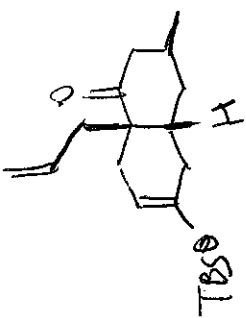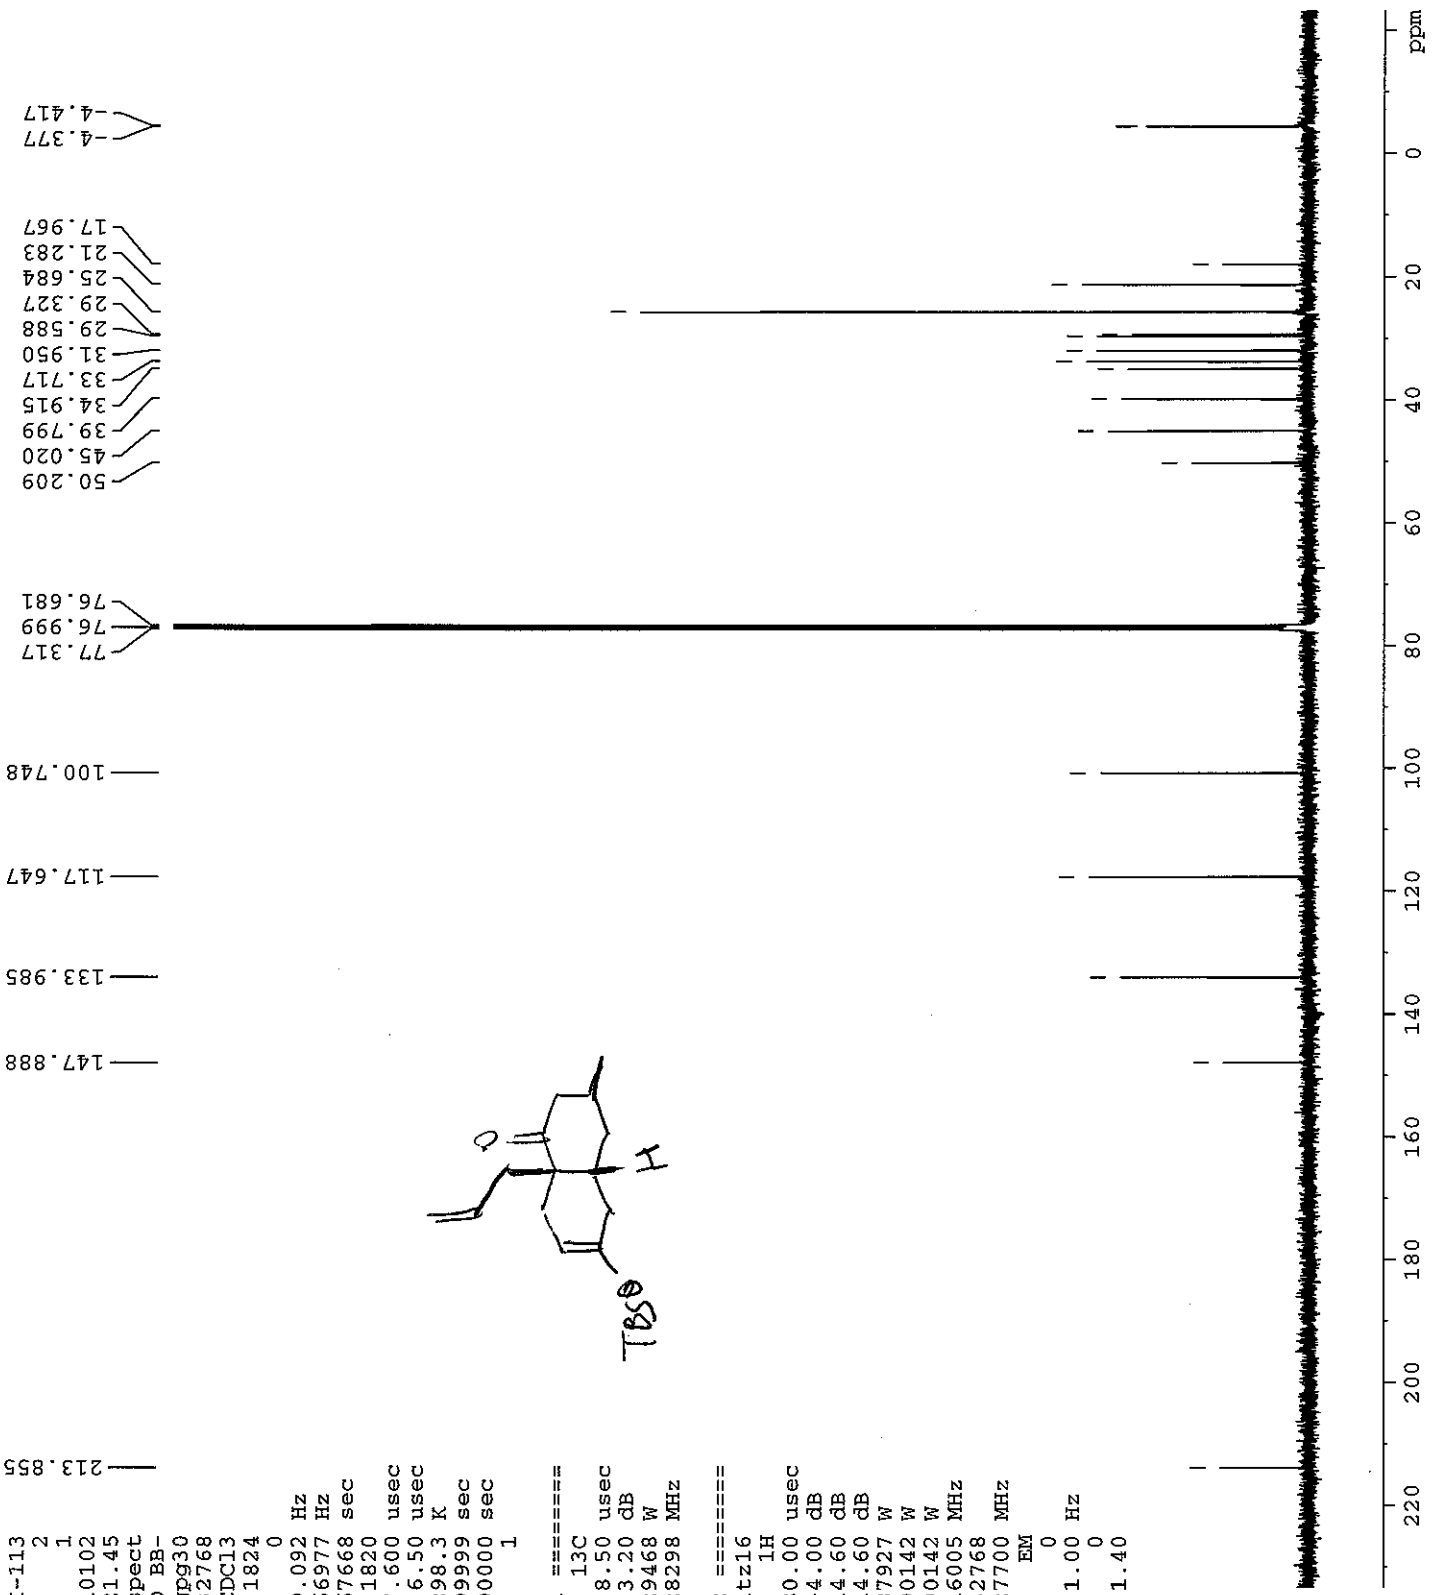

proton

NAME PFD-III-113-R2  
EXPNO 1  
PROCNO 1  
Date\_ 20110105  
Time 20.38  
INSTRUM spect  
PROBHD 5 mm PABBO BB-  
PULPROG zg30  
TD 32768  
SOLVENT CDCl3  
NS 32  
DS 0  
SWH 6009.615 Hz  
FIDRES 0.183399 Hz  
AQ 2.7263477 sec  
RG 32  
DW 83.200 usec  
DE 6.50 usec  
TE 298.2 K  
D1 1.00000000 sec  
TD0 1

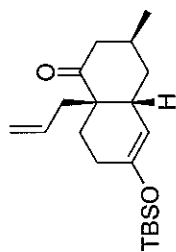

==== CHANNEL f1 =====  
NUC1 1H  
P1 9.50 usec  
PL1 -4.00 dB  
PL1W 26.94187927 W  
SFO1 400.1328009 MHz  
SI 32768  
SF 400.1300090 MHz  
WDW EM  
SSB 0  
LB 0.20 Hz  
GB 0  
PC 1.00

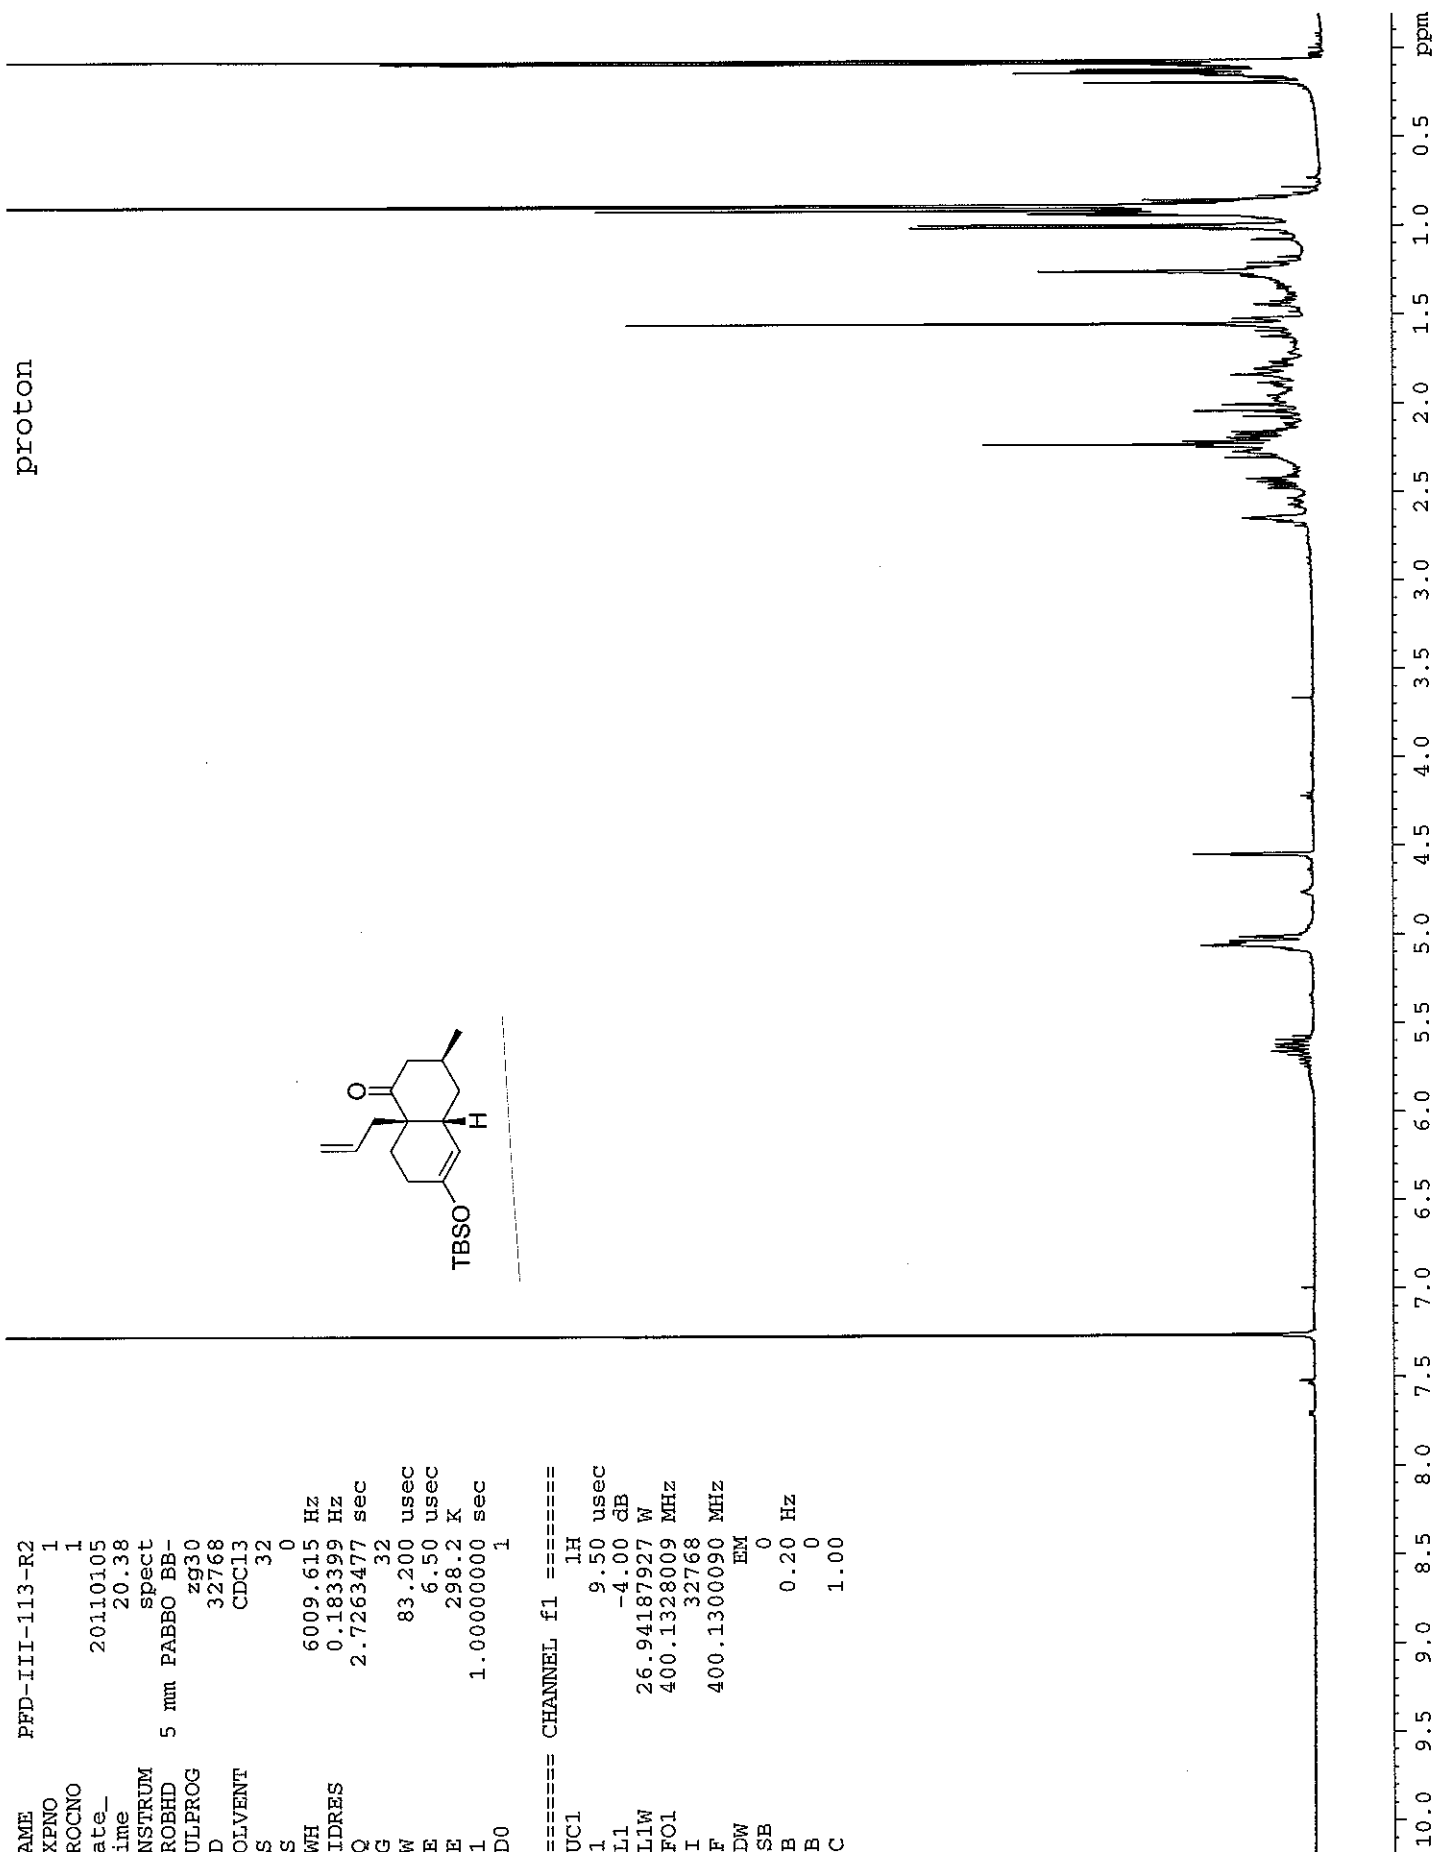

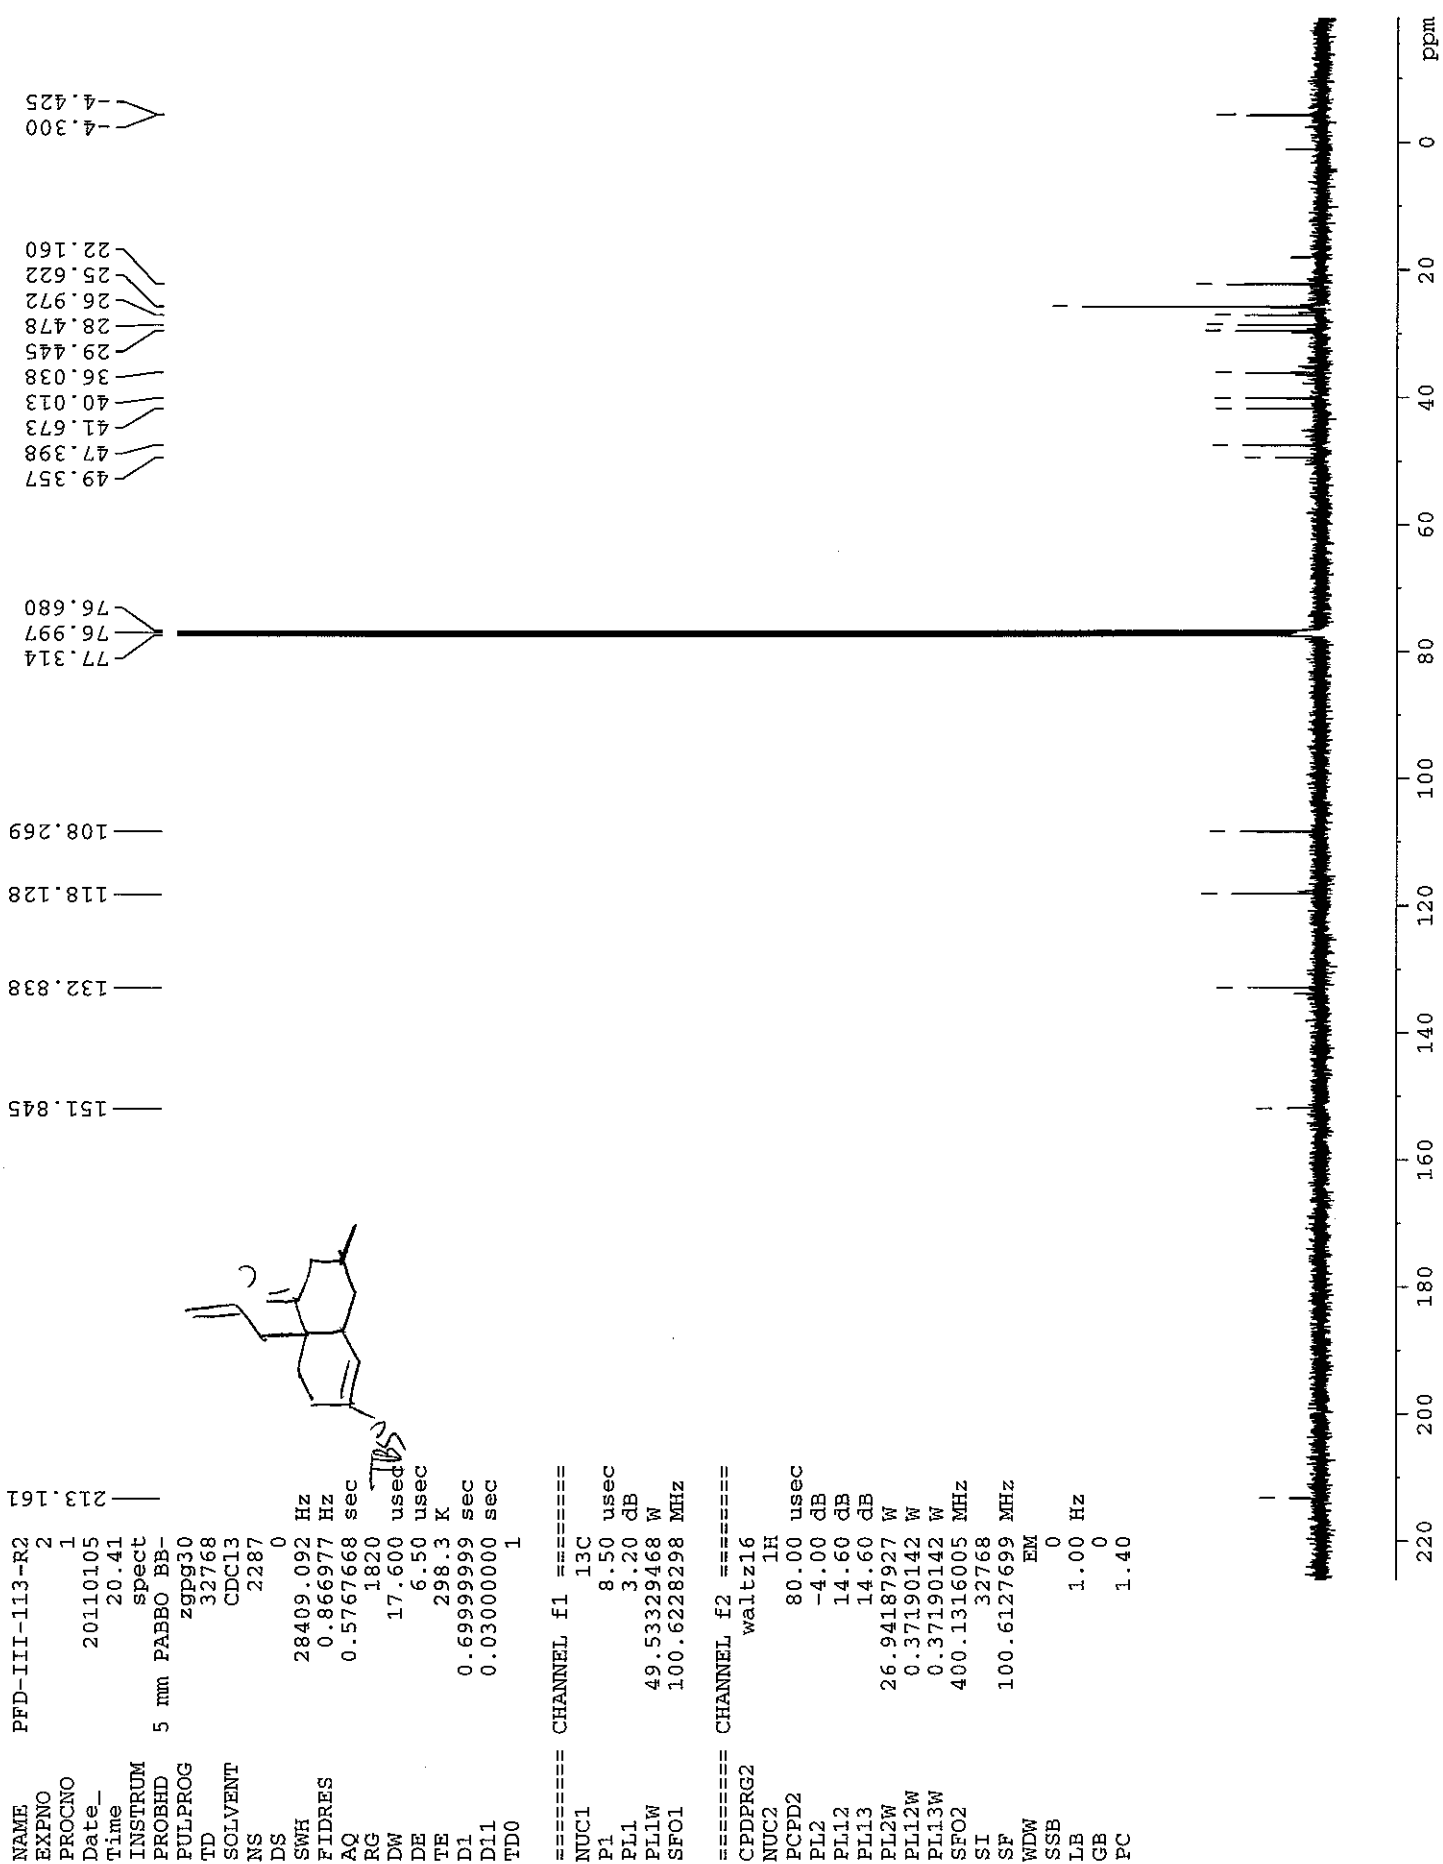



NAME PFD-III-118  
 EXPNO 1  
 PROCNO 1  
 Date\_ 20110105  
 Time 19.10  
 INSTRUM spect  
 PROBHD 5 mm PABBO BB-  
 PULPROG zg30  
 TD 32768  
 SOLVENT CDCl3  
 NS 32  
 DS 0  
 SWH 6009.615 Hz  
 FIDRES 0.183399 Hz  
 AQ 2.7263477 sec  
 RG 32  
 DW 83.200 usec  
 DE 6.50 usec  
 TE 298.1 K  
 D1 1.00000000 sec  
 TDO 1

===== CHANNEL f1 =====  
 NUC1 1H  
 P1 9.50 usec  
 PL1 -4.00 dB  
 PL1W 26.94187927 W  
 SFO1 400.1328009 MHZ  
 SI 32768  
 SF 400.1300090 MHZ  
 WDW EM  
 SSB 0  
 LB 0.20 Hz  
 GB 0  
 PC 1.00

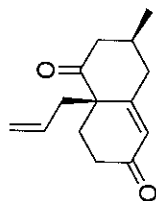

5.890  
5.892  
5.632  
5.614  
5.606  
5.596  
5.589  
5.572  
5.565  
5.555  
5.547  
5.528  
5.518  
5.510  
5.110  
2.672  
2.669  
2.654  
2.652  
2.635  
2.633  
2.618  
2.616  
2.559  
2.539  
2.523  
2.520  
2.512  
2.503  
2.441  
2.439  
2.381  
2.371  
2.344  
2.254  
2.244  
2.229  
2.219  
2.207  
2.070  
2.067  
1.139  
1.123

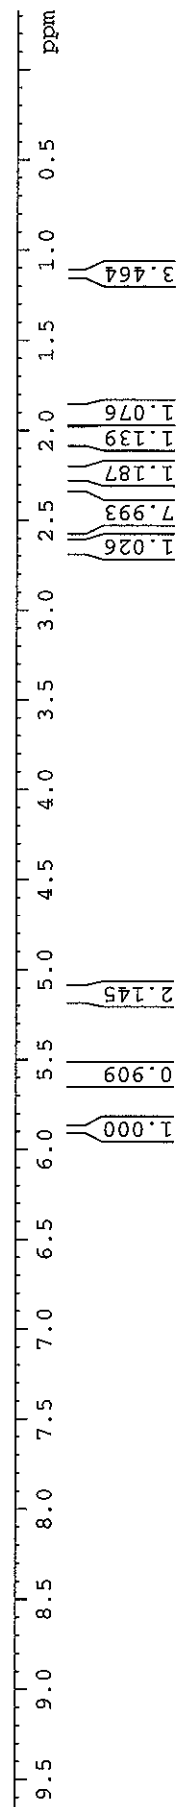

NAME PFD-III-118  
 EXPNO 2  
 PROCNO 1  
 Date\_ 20110105  
 Time 19.15  
 INSTRUM spect  
 PROBHD 5 mm PABBO BB-  
 PULPROG zgpg30  
 TD 32768  
 SOLVENT CDC13  
 NS 3424  
 DS 0  
 SWH 28409.092 Hz  
 FIDRES 0.866977 Hz  
 AQ 0.5767668 sec  
 RG 1820  
 DW 17.600 usec  
 DE 6.50 usec  
 TE 298.3 K  
 D1 0.69999999 sec  
 D11 0.03000000 sec  
 TD0 1

==== CHANNEL f1 =====  
 NUC1 13C  
 P1 8.50 usec  
 PL1 3.20 dB  
 PL1W 49.53329468 W  
 SFO1 100.6228298 MHz

==== CHANNEL f2 =====  
 CPDPRG2 waltz16  
 NUC2 1H  
 PCPD2 80.00 usec  
 PL2 -4.00 dB  
 PL12 14.60 dB  
 PL13 14.60 dB  
 PL2W 26.94187927 W  
 PL12W 0.37190142 W  
 PL13W 0.37190142 W  
 SFO2 400.1316005 MHz  
 SI 32768  
 SF 100.6127699 MHz  
 WDW EM  
 SSB 0  
 LB 1.00 Hz  
 GB 0  
 PC 1.40

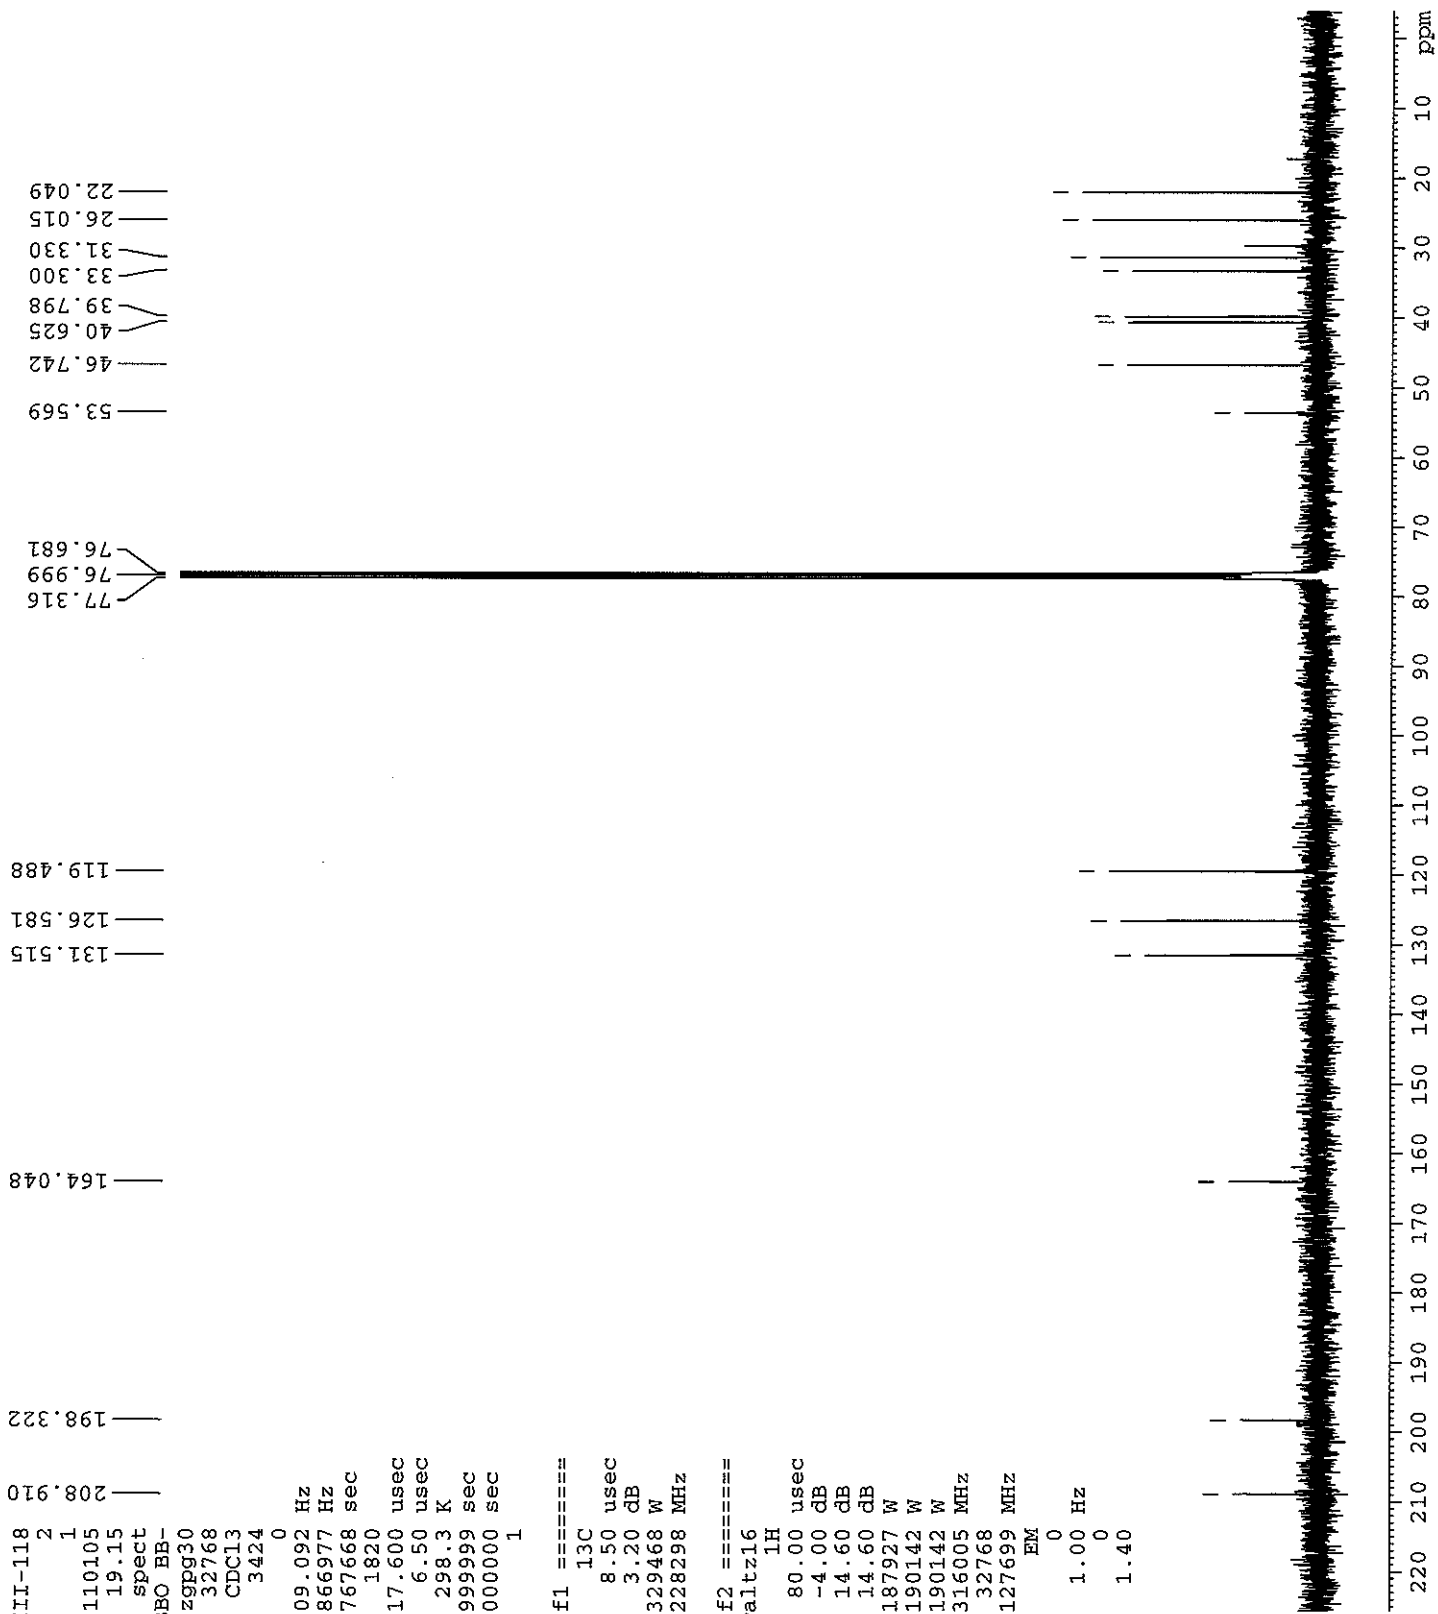

NAME PFD-III-42  
EXPNO 2  
PROCNO 1  
Date\_ 20090329  
Time 11.01  
INSTRUM spect  
PROBHD 5 mm Multinucl  
PULPROG zg  
TD 32768  
SOLVENT D2O  
NS 32  
DS 0  
SWH 5995.204 Hz  
FIDRES 0.182959 Hz  
AQ 2.7329011 sec  
RG 10.1  
DW 83.400 usec  
DE 6.00 usec  
TE 300.0 K  
D1 1.0000000 sec  
TD0 1

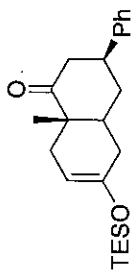

==== CHANNEL f1 =====  
NUC1 1H  
P1 2.50 usec  
PL1 0.00 dB  
SFO1 399.9225995 MHz  
SI 32768  
SF 399.9200000 MHz  
WDW EM  
SSB 0  
LB 0.20 Hz  
GB 0  
PC 1.00

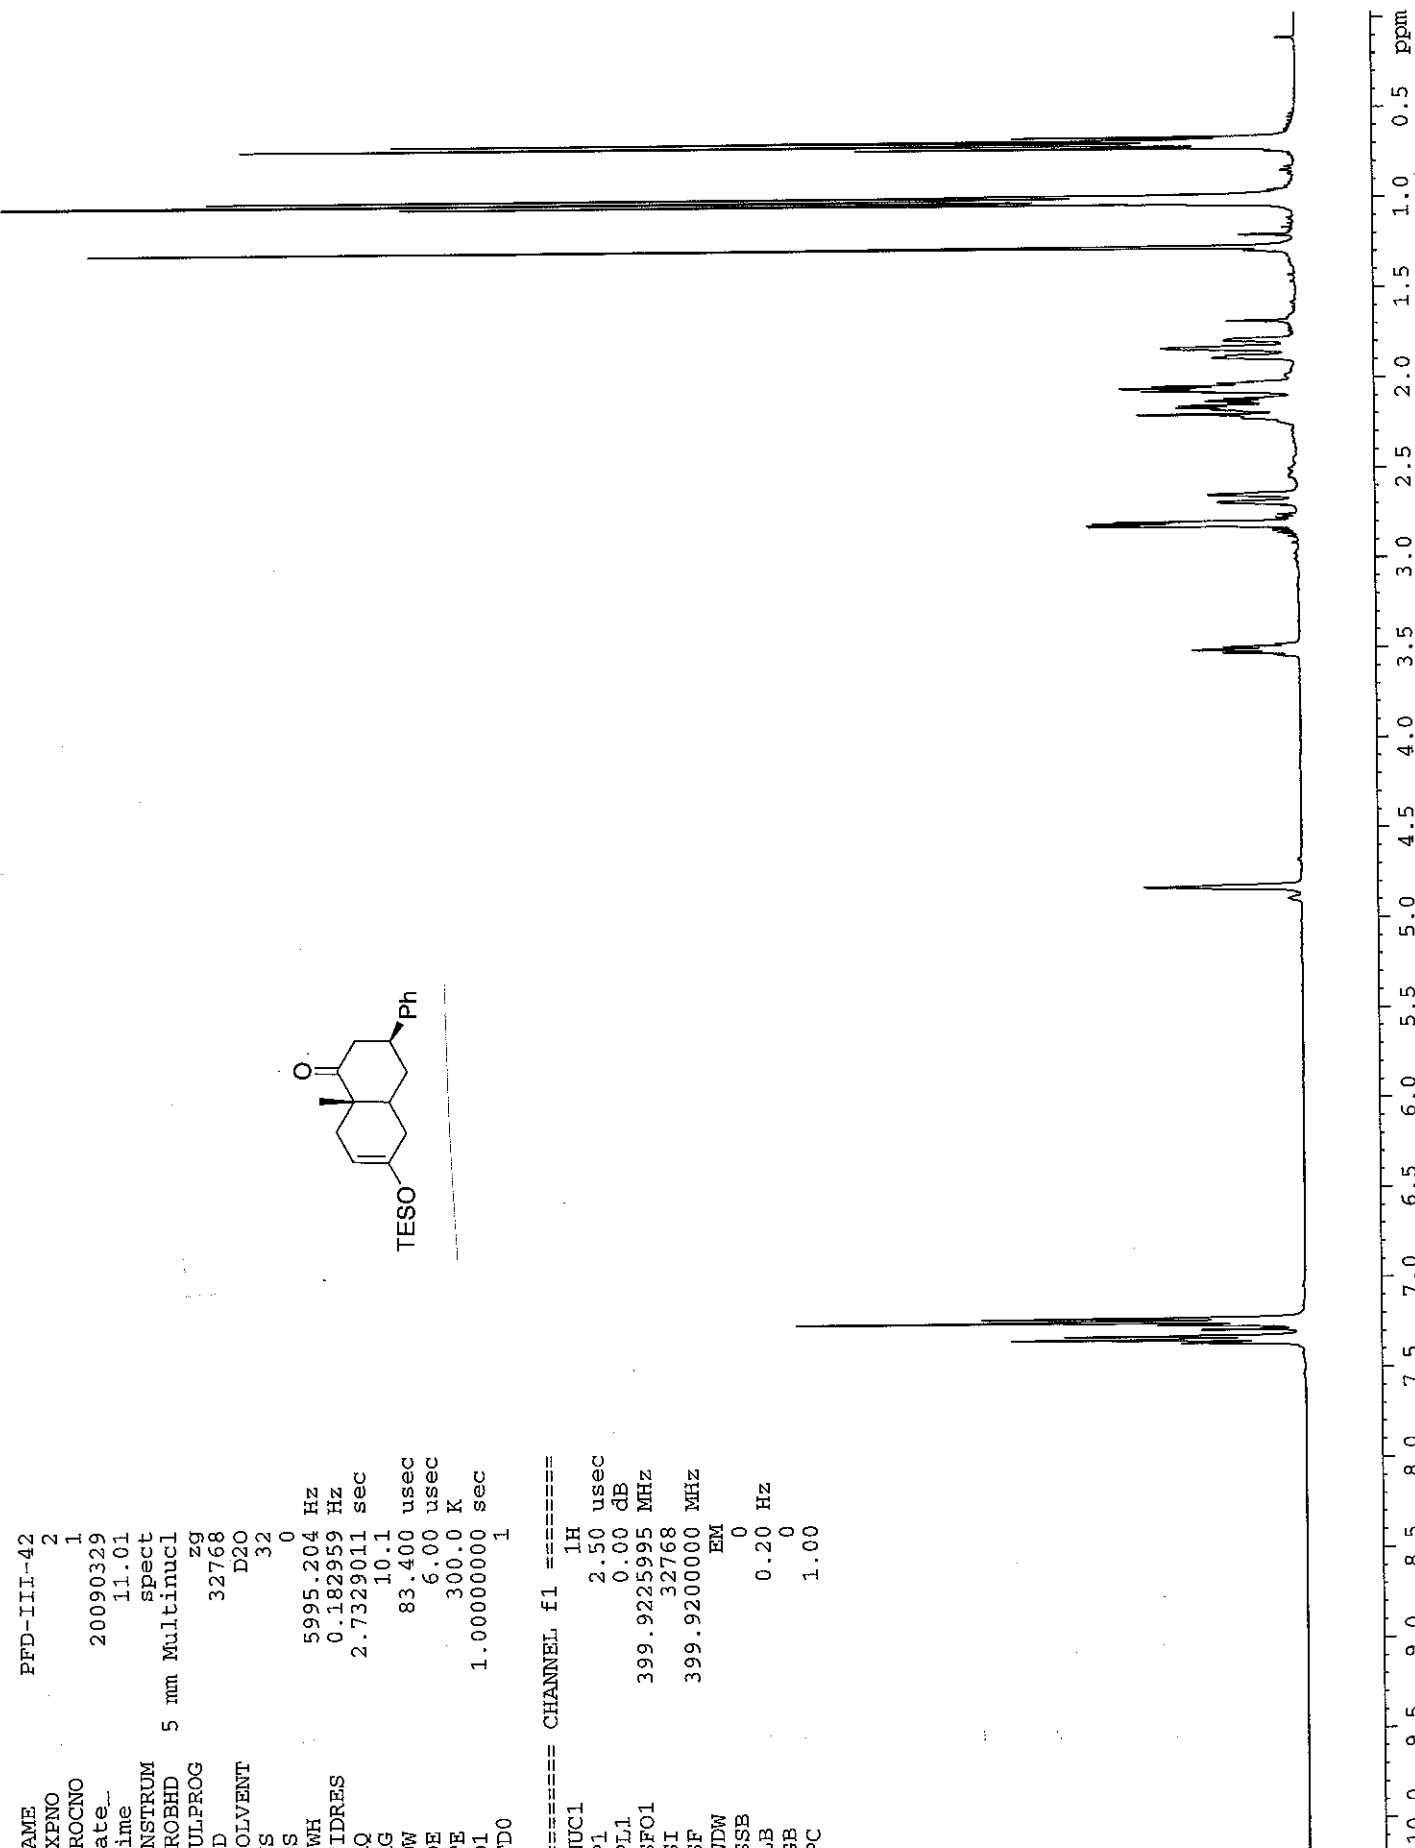

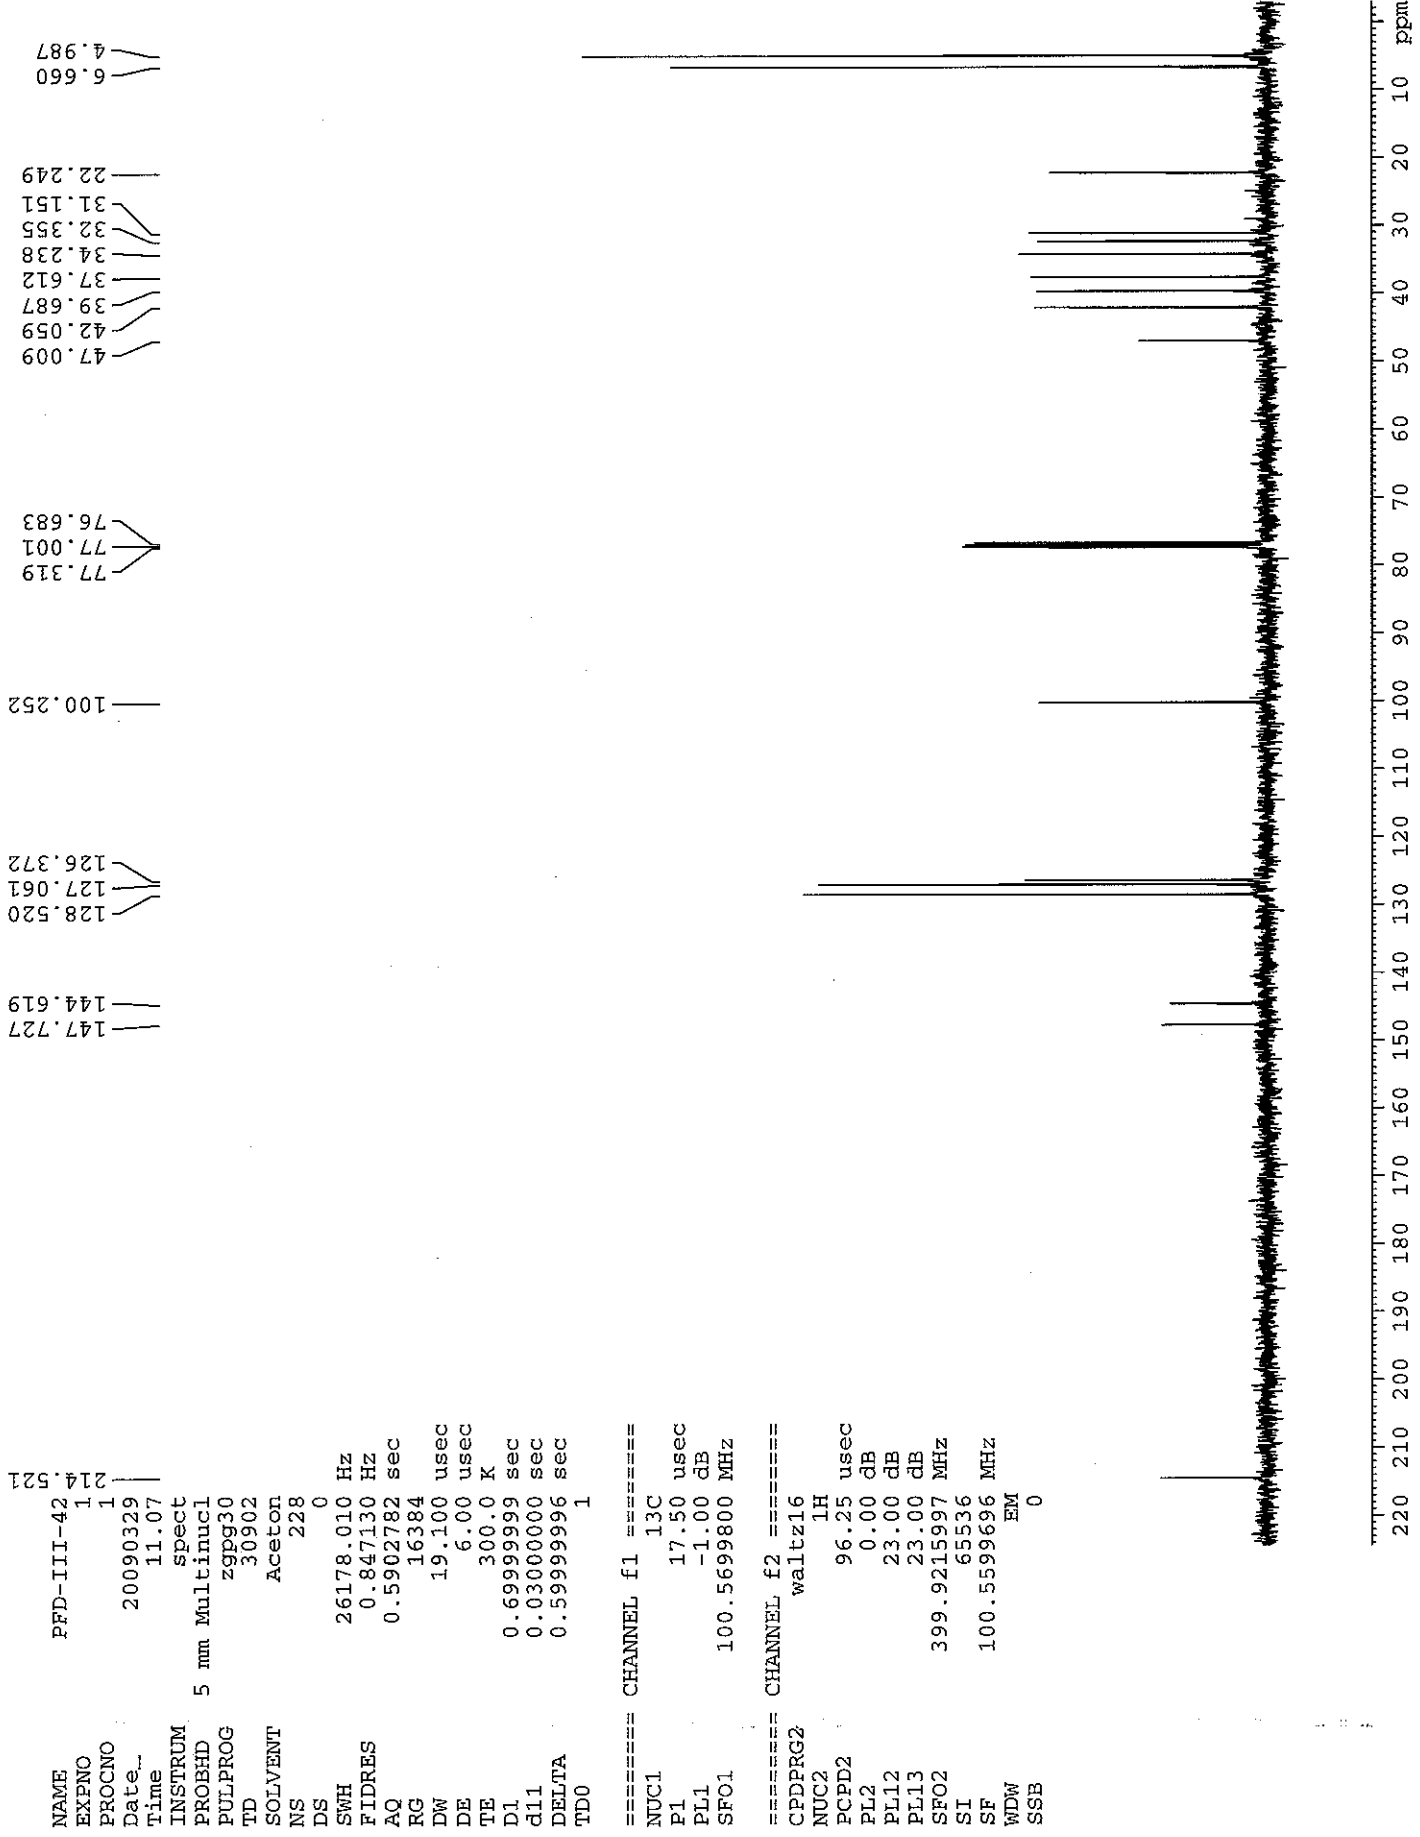

NAME PFD-III-43  
EXPNO 1  
PROCNO 1  
Date\_ 20090330  
Time 23.08  
INSTRUM spect  
PROBHD 5 mm Multinucl  
PULPROG zg  
TD 32768  
SOLVENT CDC13  
NS 32  
DS 0  
SWH 5995.204 Hz  
FIDRES 0.182959 Hz  
AQ 2.7329011 sec  
RG 10.1  
DW 83.400 usec  
DE 6.00 usec  
TE 300.0 K  
D1 1.00000000 sec  
TDO 1

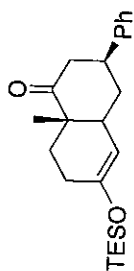

==== CHANNEL f1 =====  
NUC1 1H  
P1 2.50 usec  
PL1 0.00 dB  
SFO1 399.9225995 MHz  
SI 32768  
SF 399.9200109 MHz  
WDW EM  
SSB 0  
LB 0.20 Hz  
GB 0  
PC 1.00

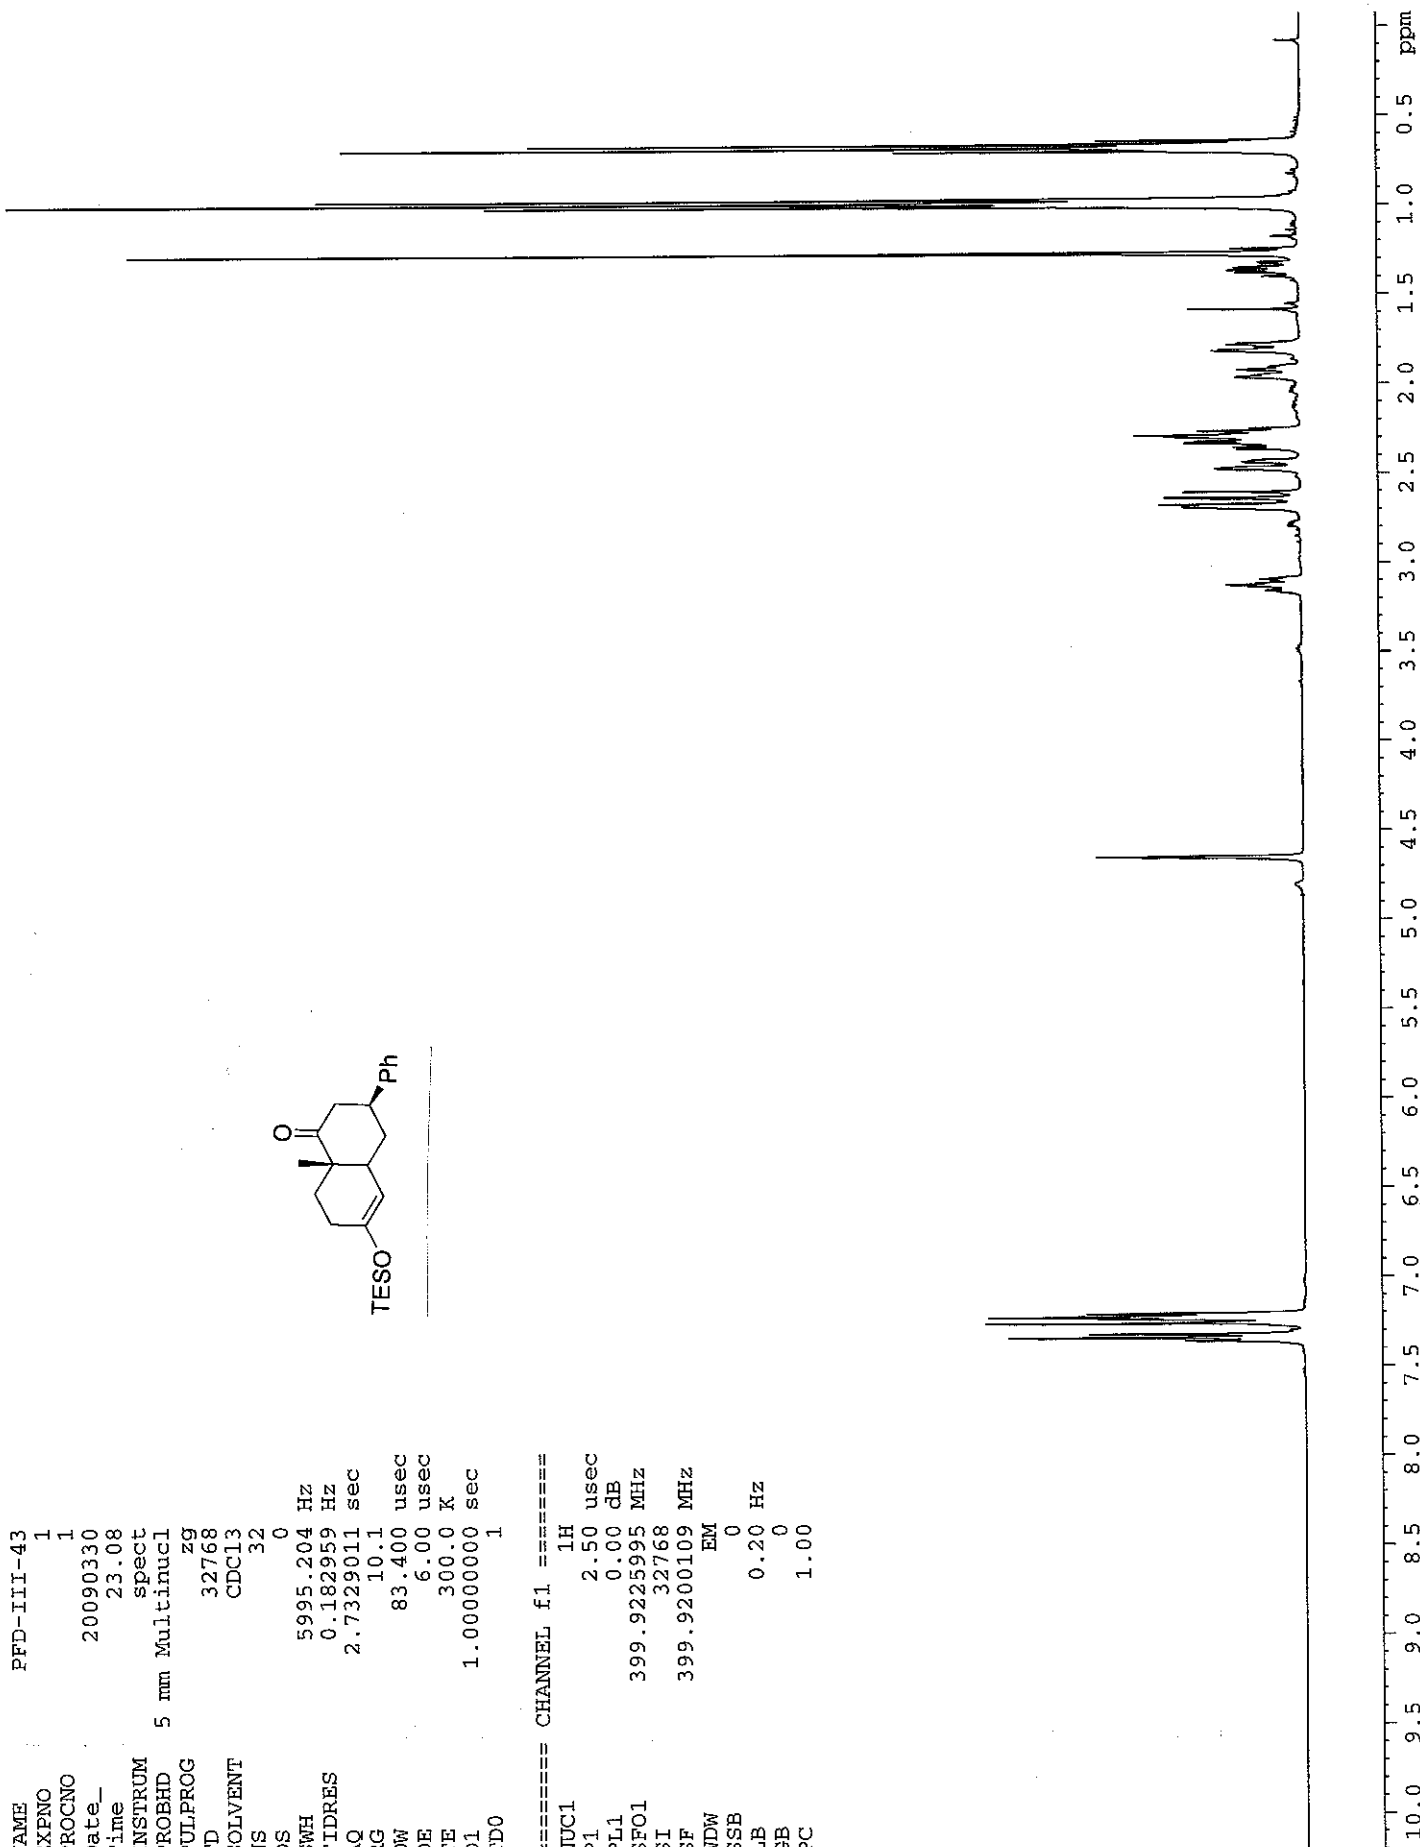

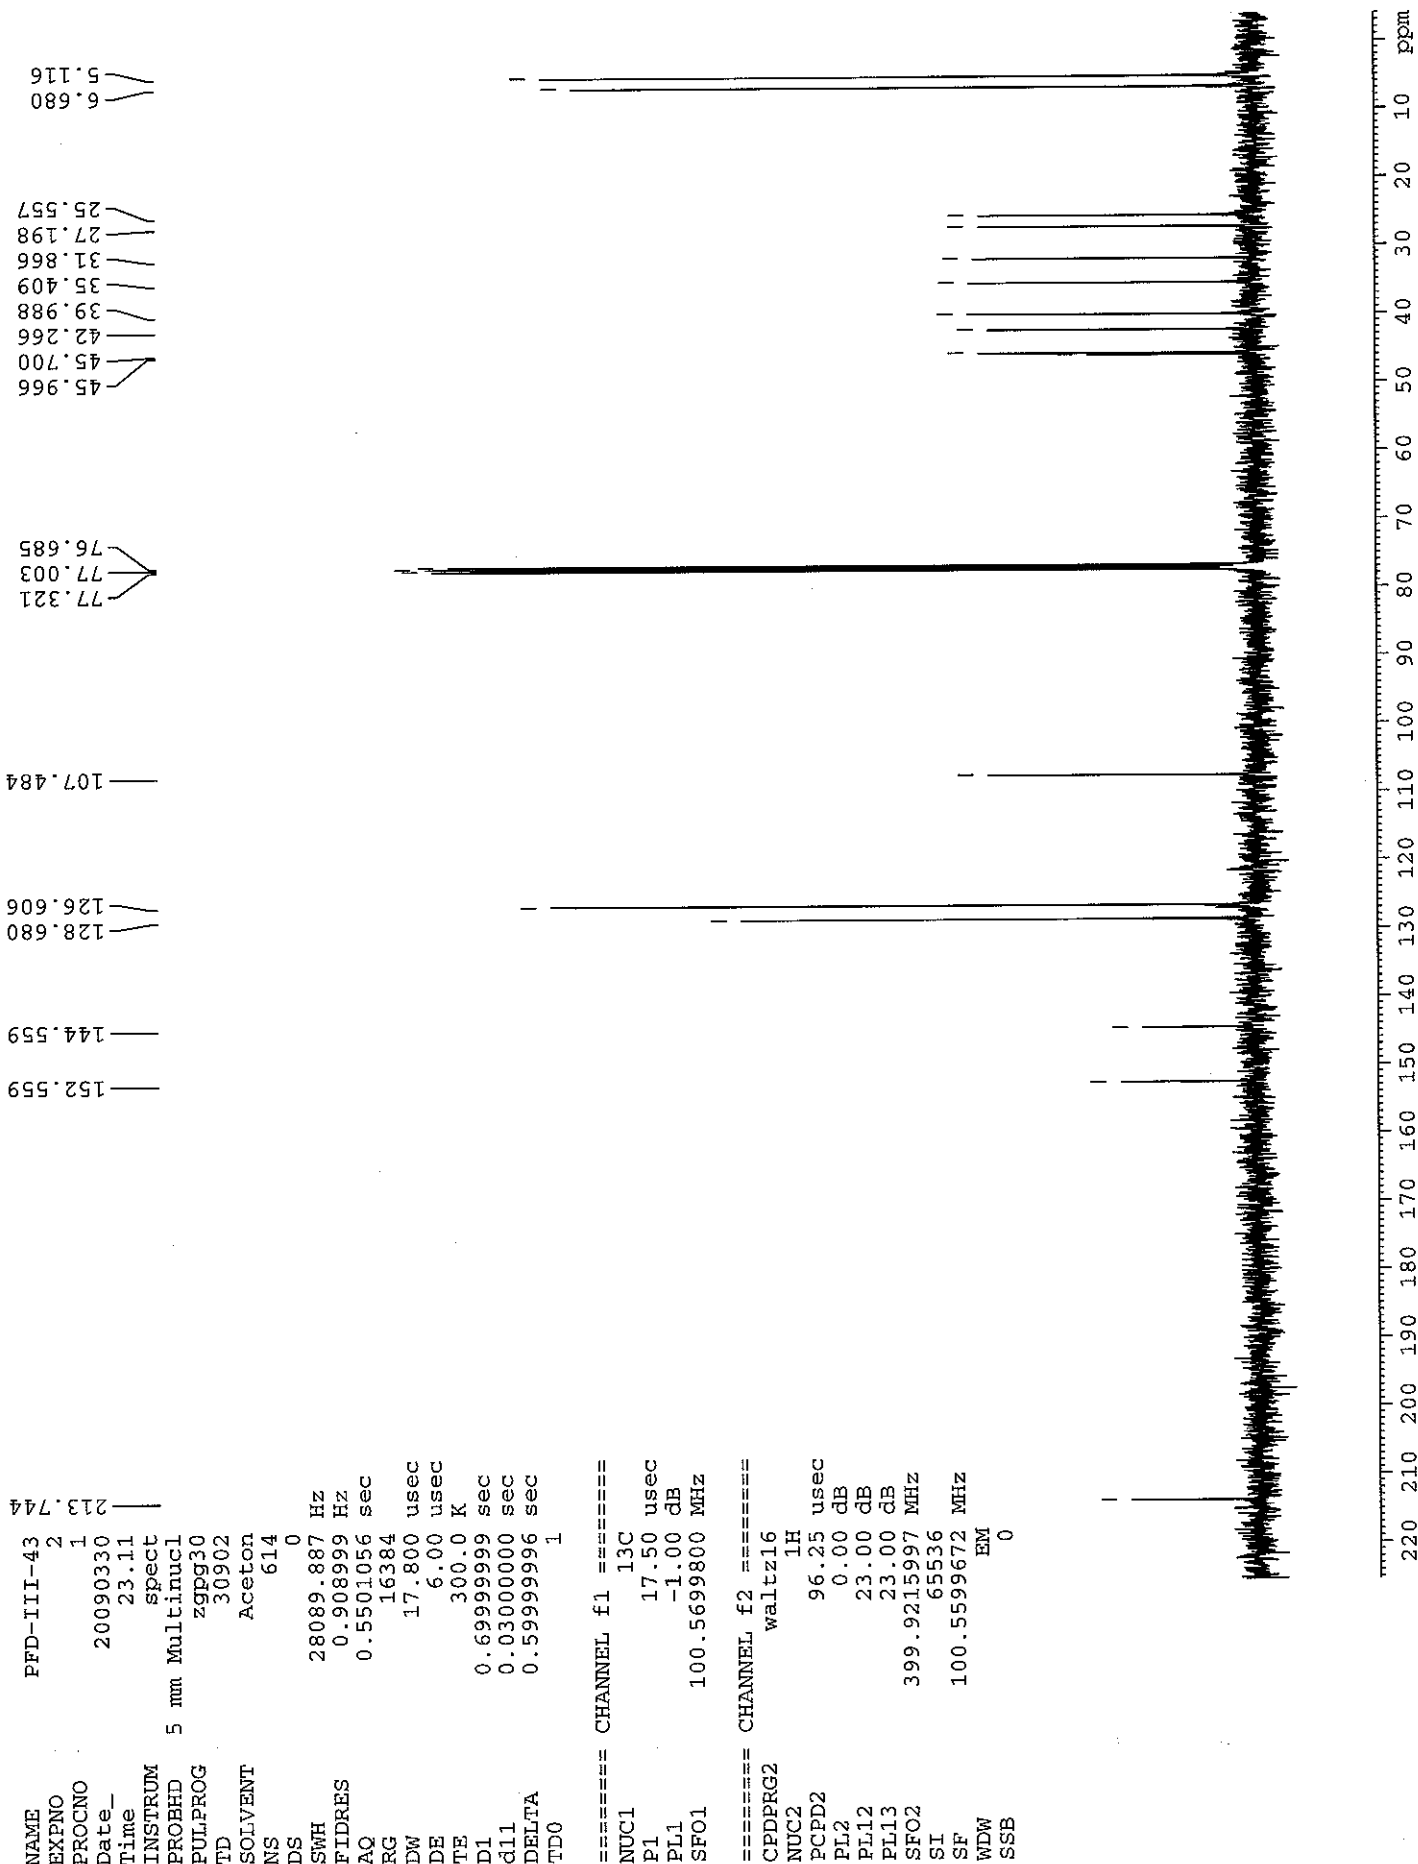

NAME PFD-III-44  
EXPNO 1  
PROCNO 1  
Date\_ 20090401  
Time 15.11  
INSTRUM spect  
PROBHD 5 mm Multinucl  
PULPROG zg  
TD 32768  
SOLVENT D2O  
NS 32  
DS 0  
SWH 5995.204 Hz  
FIDRES 0.182959 Hz  
AQ 2.7329011 sec  
RG 10.1  
DW 83.400 usec  
DE 5.00 usec  
TE 300.0 K  
D1 1.00000000 sec  
TD0 1

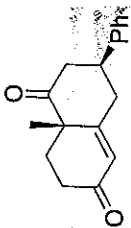

==== CHANNEL f1 =====  
NUC1 1H  
P1 2.50 usec  
PL1 0.00 dB  
SFO1 399.9225995 MHz  
SI 32768  
SF 399.9200111 MHz  
WDW EM  
SSB 0  
LB 0.20 Hz  
GB 0  
PC 1.00

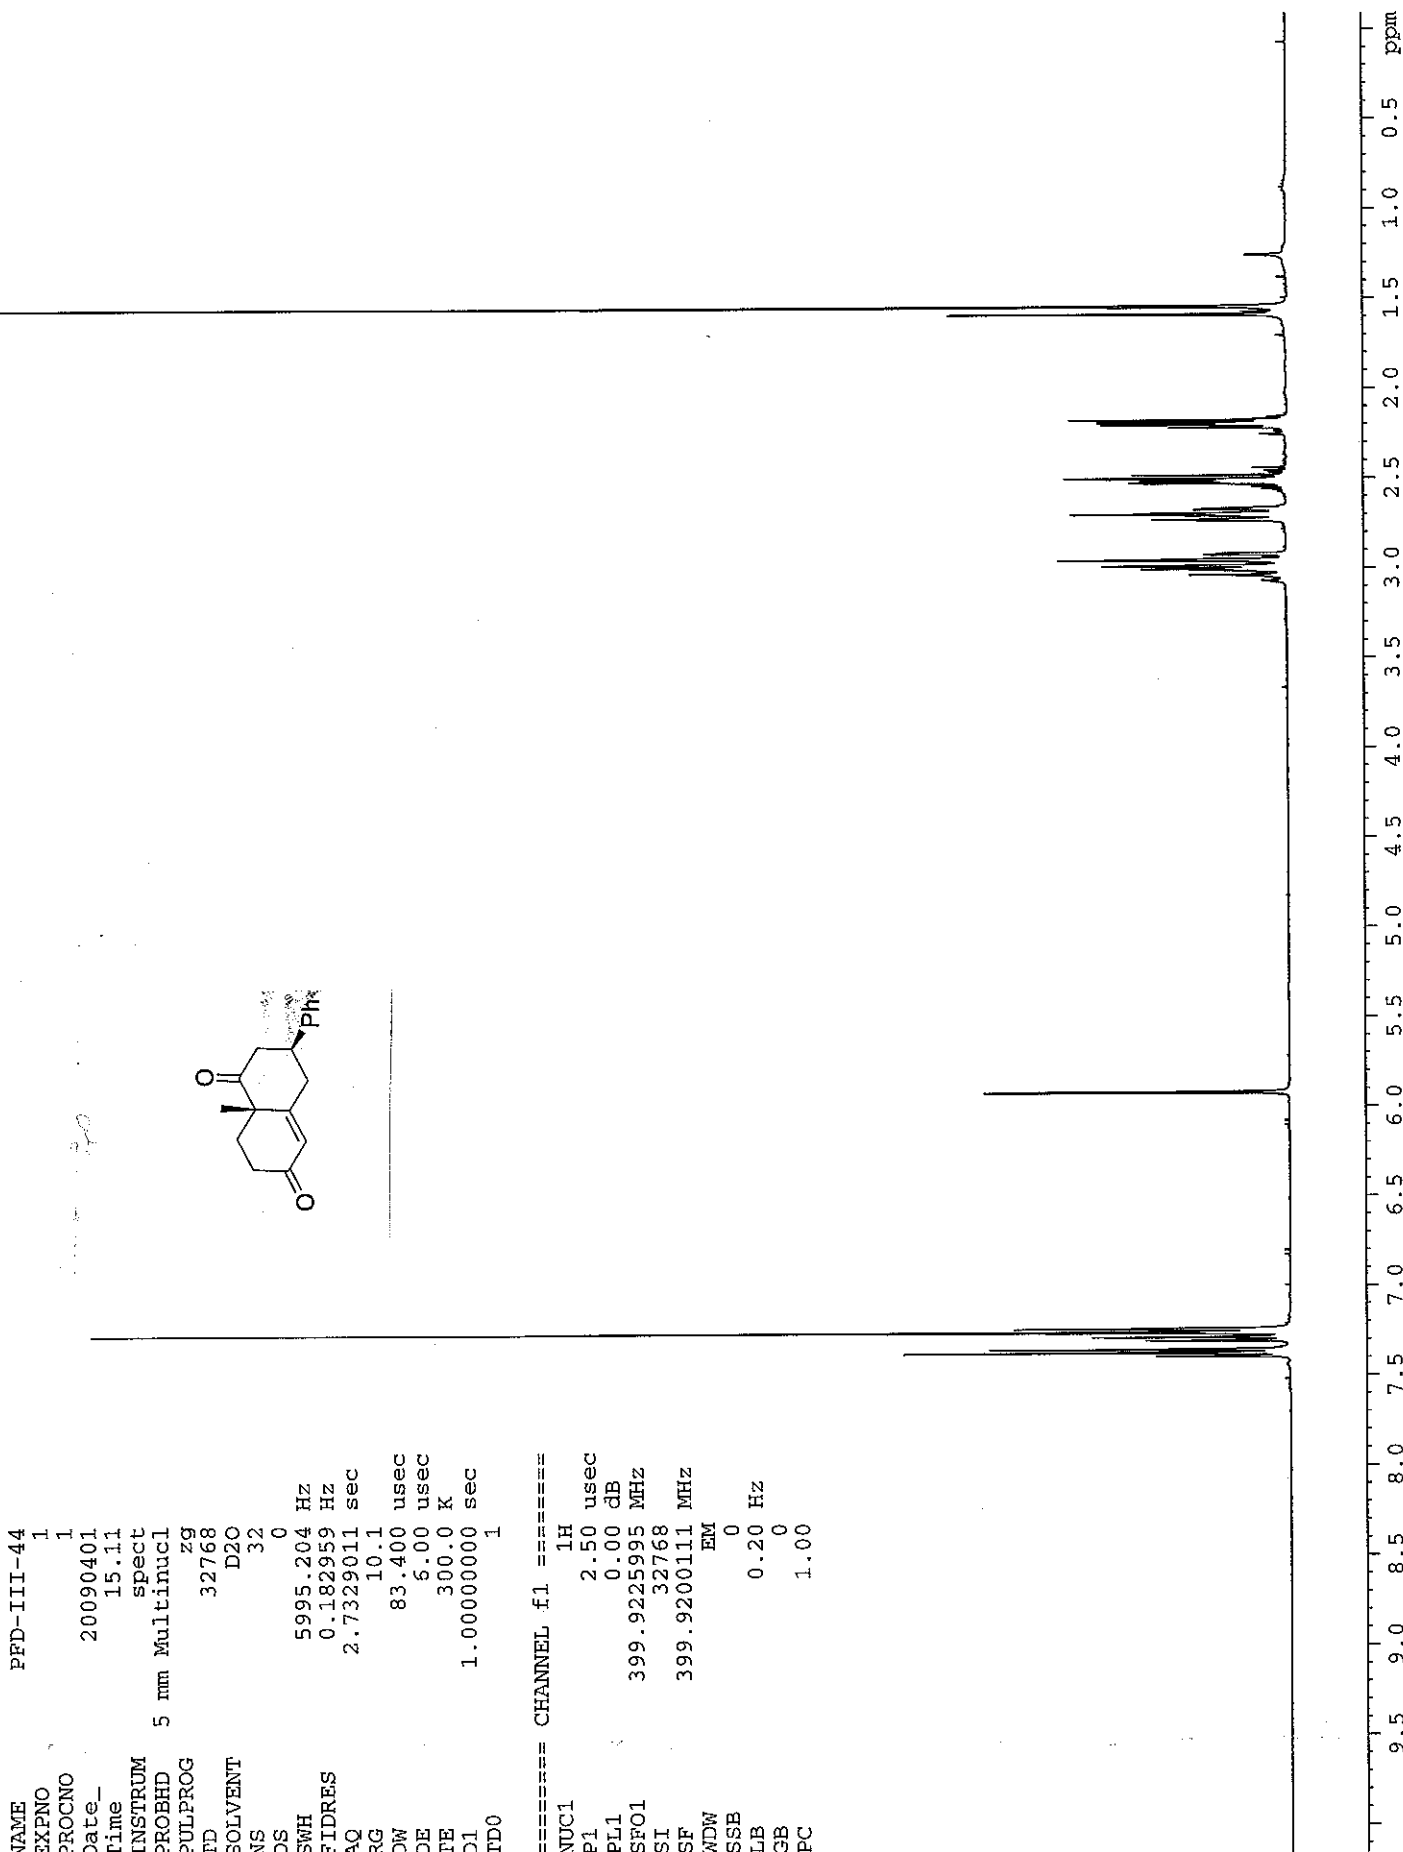

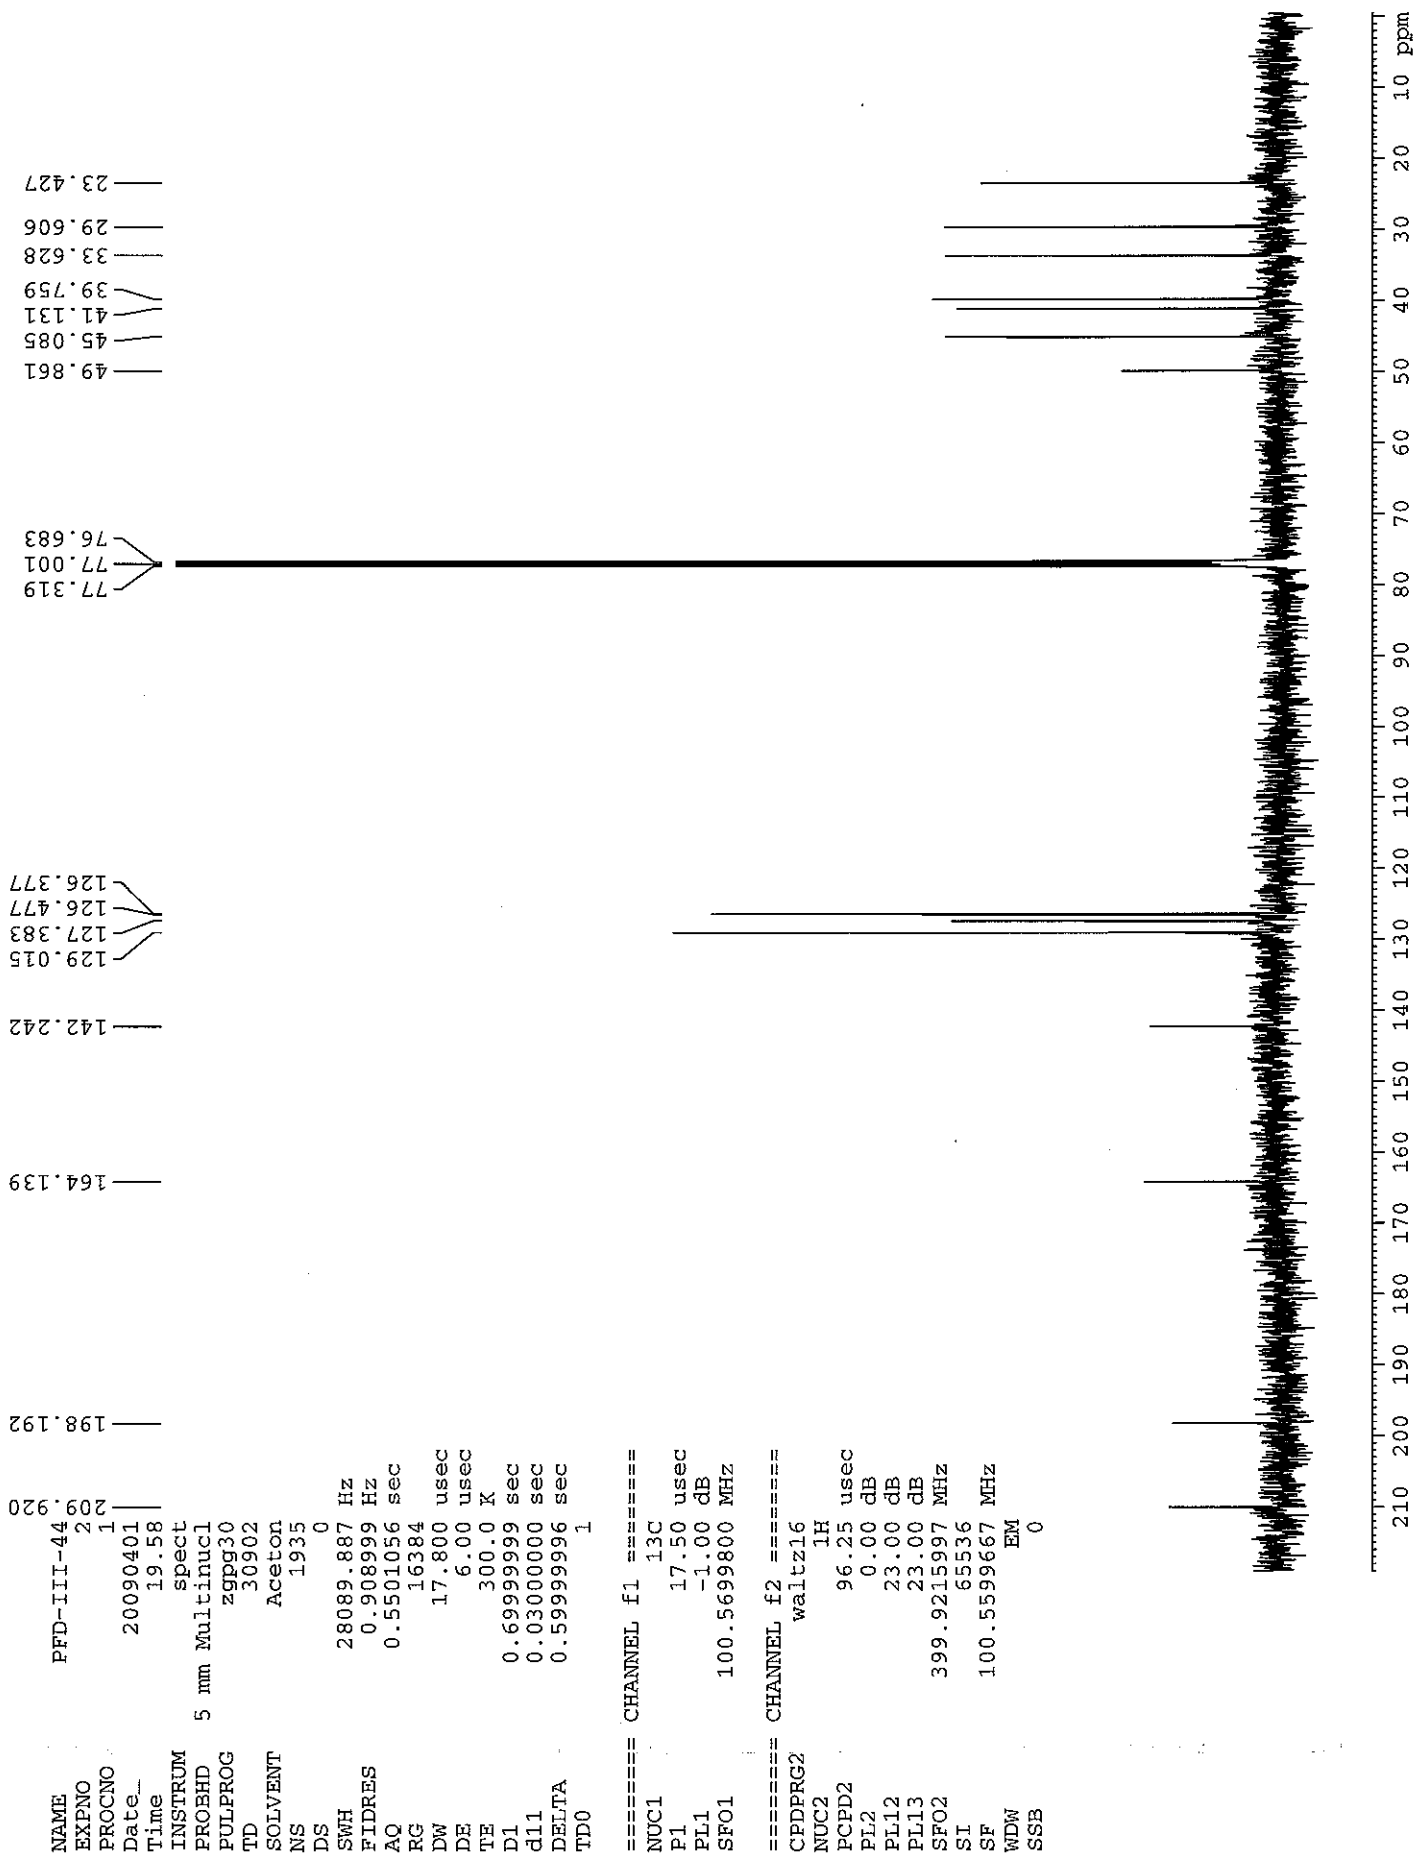



NAME PFD-III-46  
EXPNO 1  
PROCNO 1  
Date\_ 20090502  
Time 17.23  
INSTRUM spect  
PROBHD 5 mm Multinucl  
PULPROG zg  
TD 32768  
SOLVENT D2O  
NS 19  
DS 0  
SWH 5995.204 Hz  
FIDRES 0.182959 Hz  
AQ 2.7329011 sec  
RG 10.1  
DW 83.400 usec  
DE 6.00 usec  
TE 300.1 K  
D1 1.00000000 sec  
TD0 1

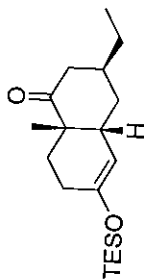

==== CHANNEL f1 =====  
NUC1 1H  
P1 2.50 usec  
PL1 0.00 dB  
SFO1 399.9225995 MHz  
SI 32768  
SF 399.9200000 MHz  
WDW EM  
SSB 0  
LB 0.20 Hz  
GB 0  
PC 1.00

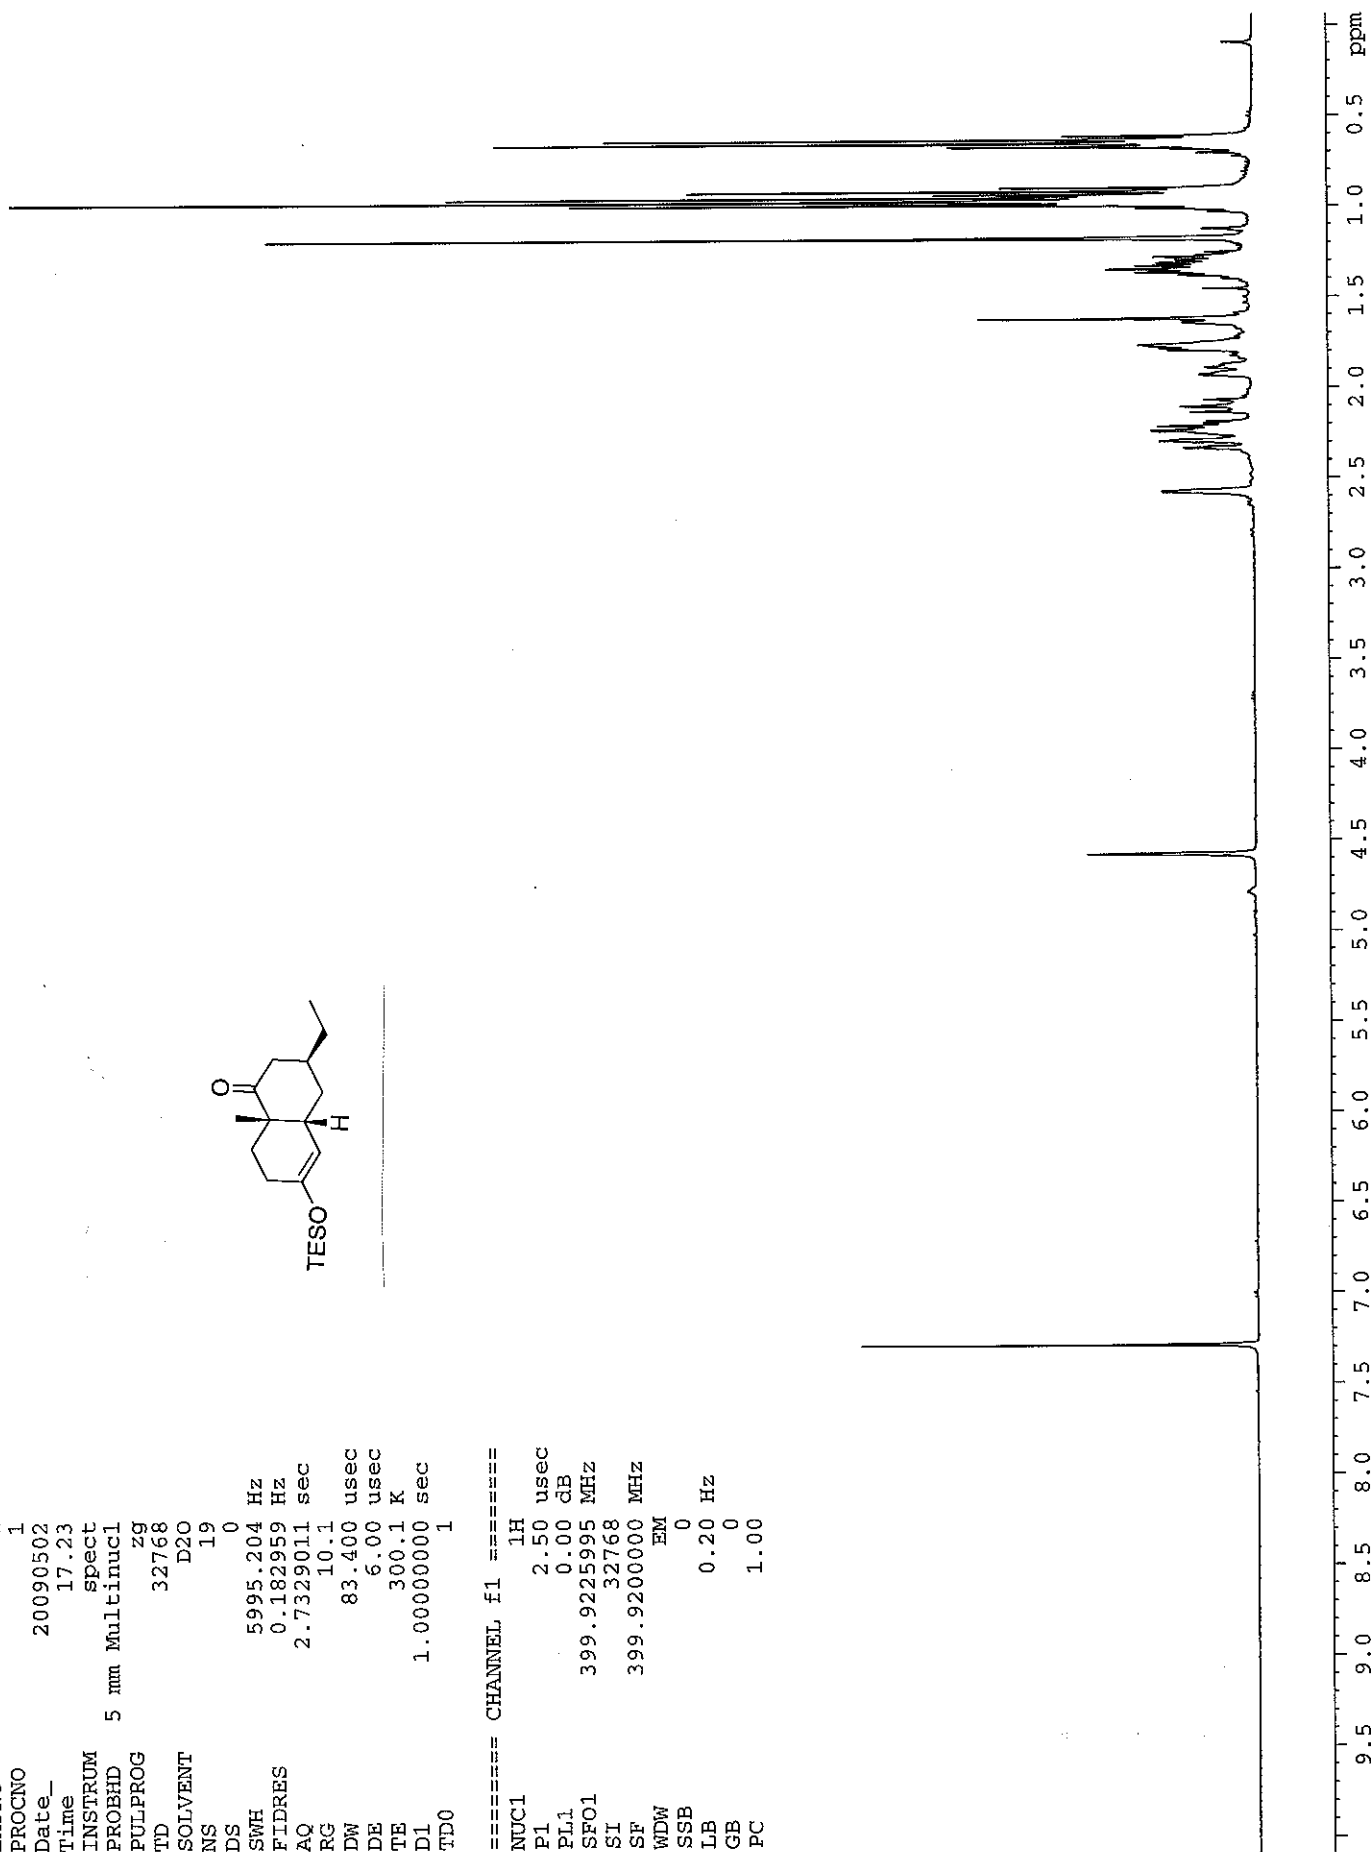

NAME PFD-III-46  
 EXPNO 2  
 PROCNO 1  
 Date\_ 20090502  
 Time 17.25  
 INSTRUM spect  
 PROBHD 5 mm Multinucl  
 PULPROG zgpg30  
 TD 30902  
 SOLVENT Aceton  
 NS 562  
 DS 0  
 SWH 25125.629 Hz  
 FIDRES 0.813074 Hz  
 AQ 0.6149998 sec  
 RG 16384  
 DW 19.900 usec  
 DE 6.00 usec  
 TE 300.0 K  
 D1 0.699999999 sec  
 d11 0.03000000 sec  
 DELTA 0.59999996 sec  
 TD0 1

==== CHANNEL f1 =====  
 NUC1 13C  
 P1 17.50 usec  
 PL1 -1.00 dB  
 SFO1 100.5699800 MHz

==== CHANNEL f2 =====  
 CPDPRG2 waltz16  
 NUC2 1H  
 PCPD2 96.25 usec  
 PL2 0.00 dB  
 PL12 23.00 dB  
 PL13 23.00 dB  
 SFO2 399.9215997 MHz  
 SI 65536  
 SF 100.5599657 MHz  
 WDW EM  
 SSB 0

151.823  
 108.050  
 77.319  
 77.001  
 76.684  
 46.163  
 44.727  
 42.029  
 36.105  
 34.054  
 31.800  
 29.370  
 27.142  
 25.361  
 11.241  
 6.644  
 5.066

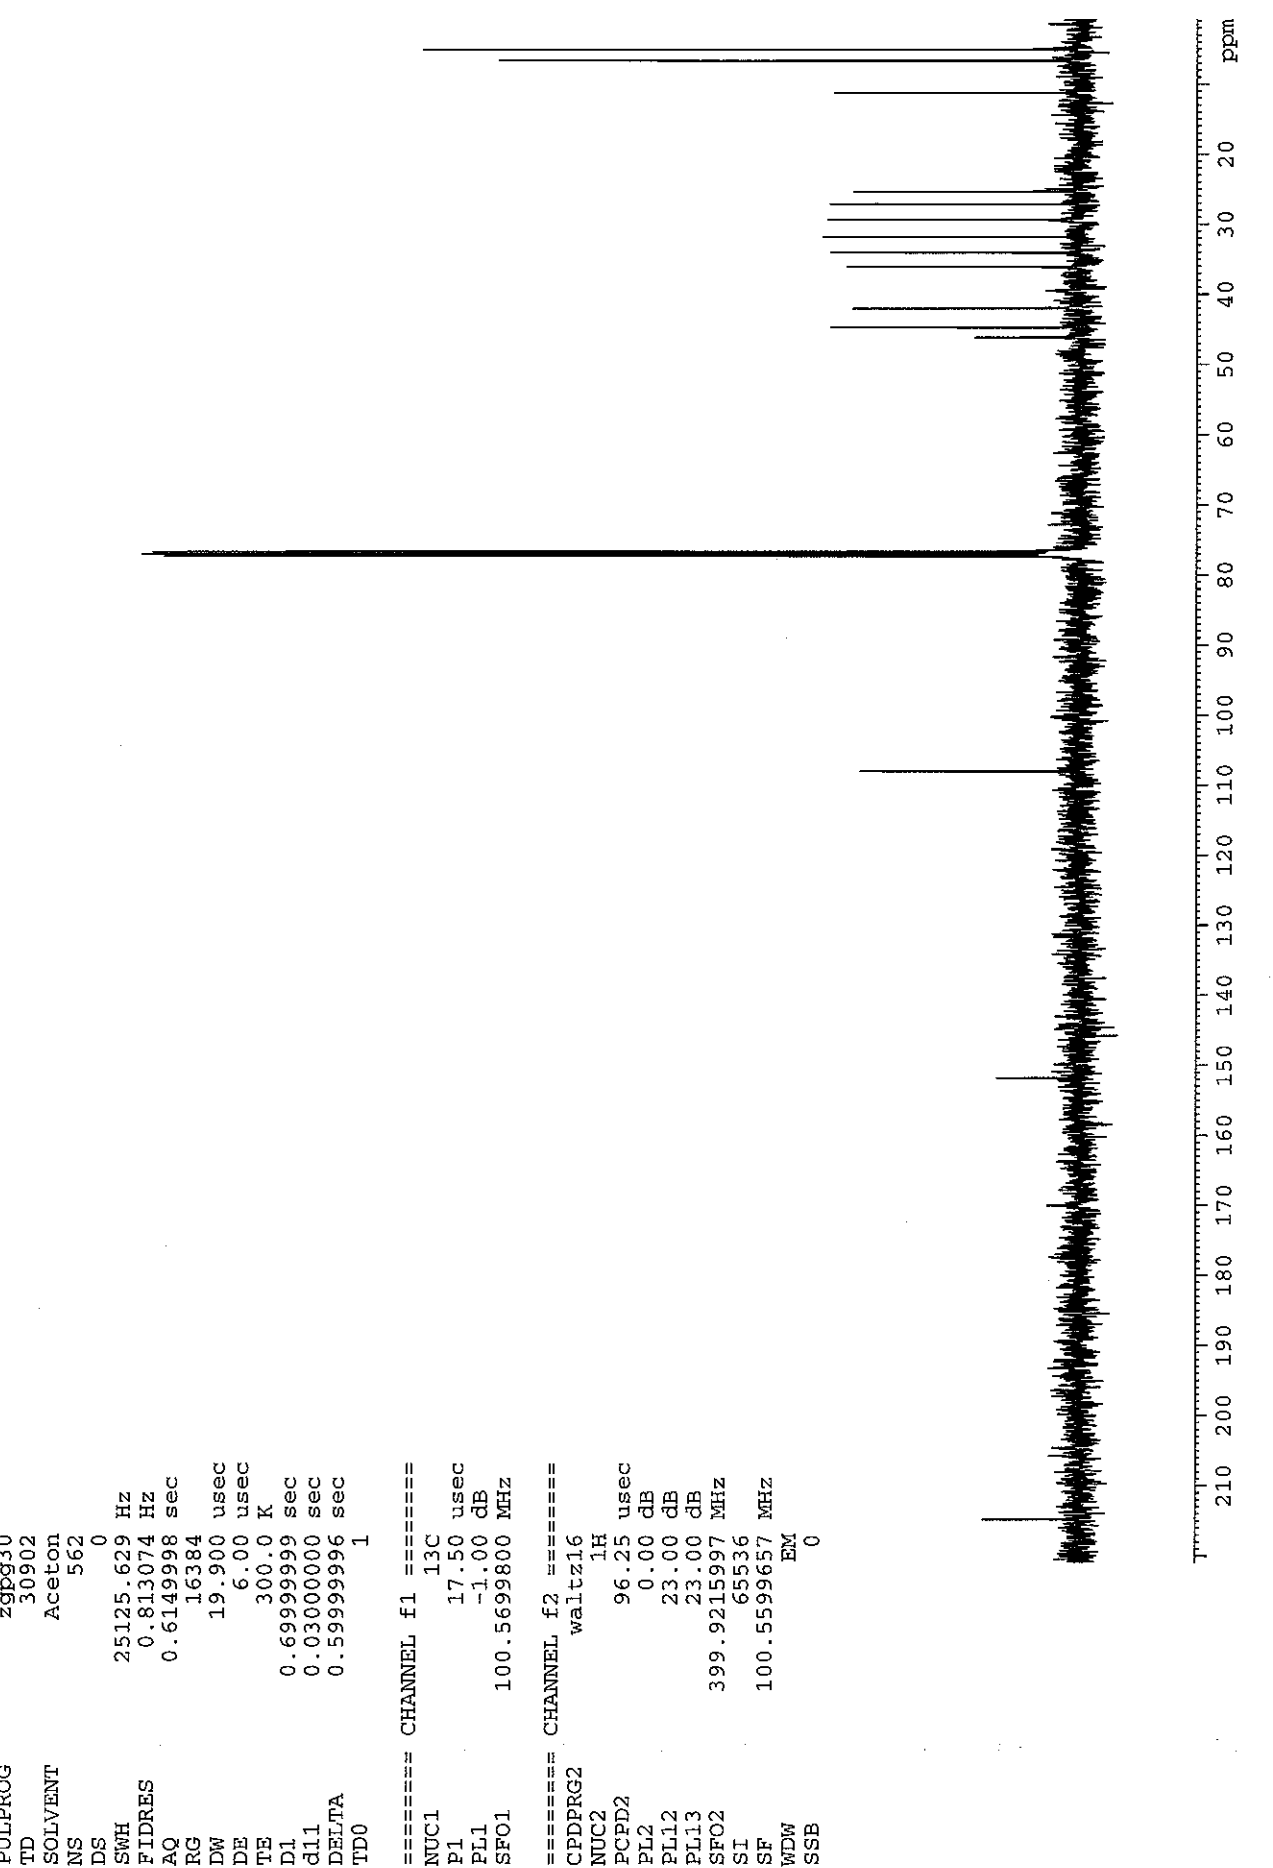

NAME PFD-III-47  
EXPNO 1  
PROCNO 1  
Date\_ 20090505  
Time 16.12  
INSTRUM spect  
PROBHD 5 mm TXI 13C Z  
PULPROG zg  
TD 32768  
SOLVENT CDCl3  
NS 12  
DS 0  
SWH 6009.615 Hz  
FIDRES 0.183399 Hz  
AQ 2.7263477 sec  
RG 16  
DW 83.200 usec  
DE 5.50 usec  
TE 300.0 K  
D1 2.00000000 sec  
TD0 1

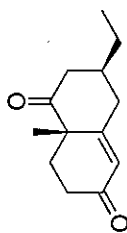

==== CHANNEL f1 =====  
NUC1 1H  
P1 3.00 usec  
PL1 3.00 dB  
SFO1 500.1325006 MHz  
SI 16384  
SF 500.1300000 MHz  
WDW EM  
SSB 0  
LB 0.20 Hz  
GB 0  
PC 1.00

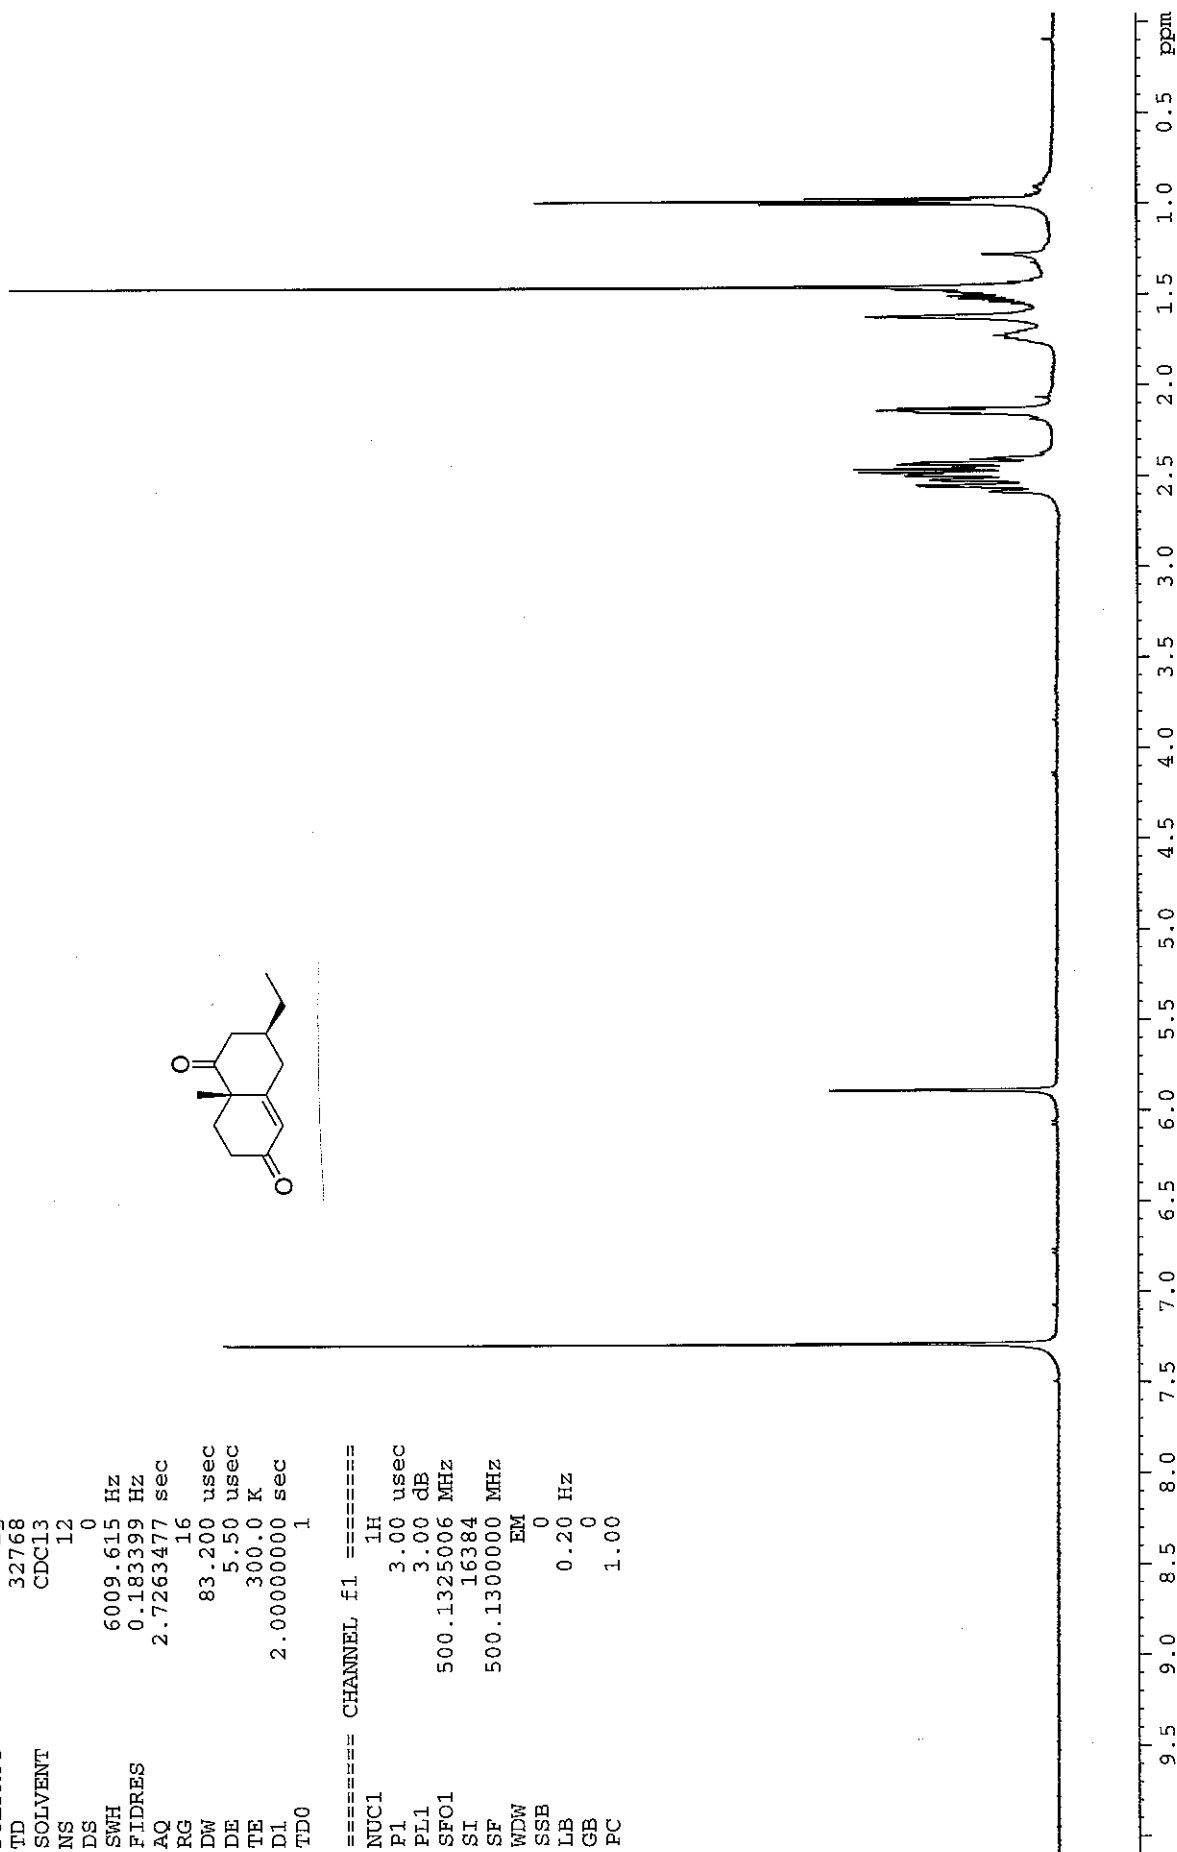

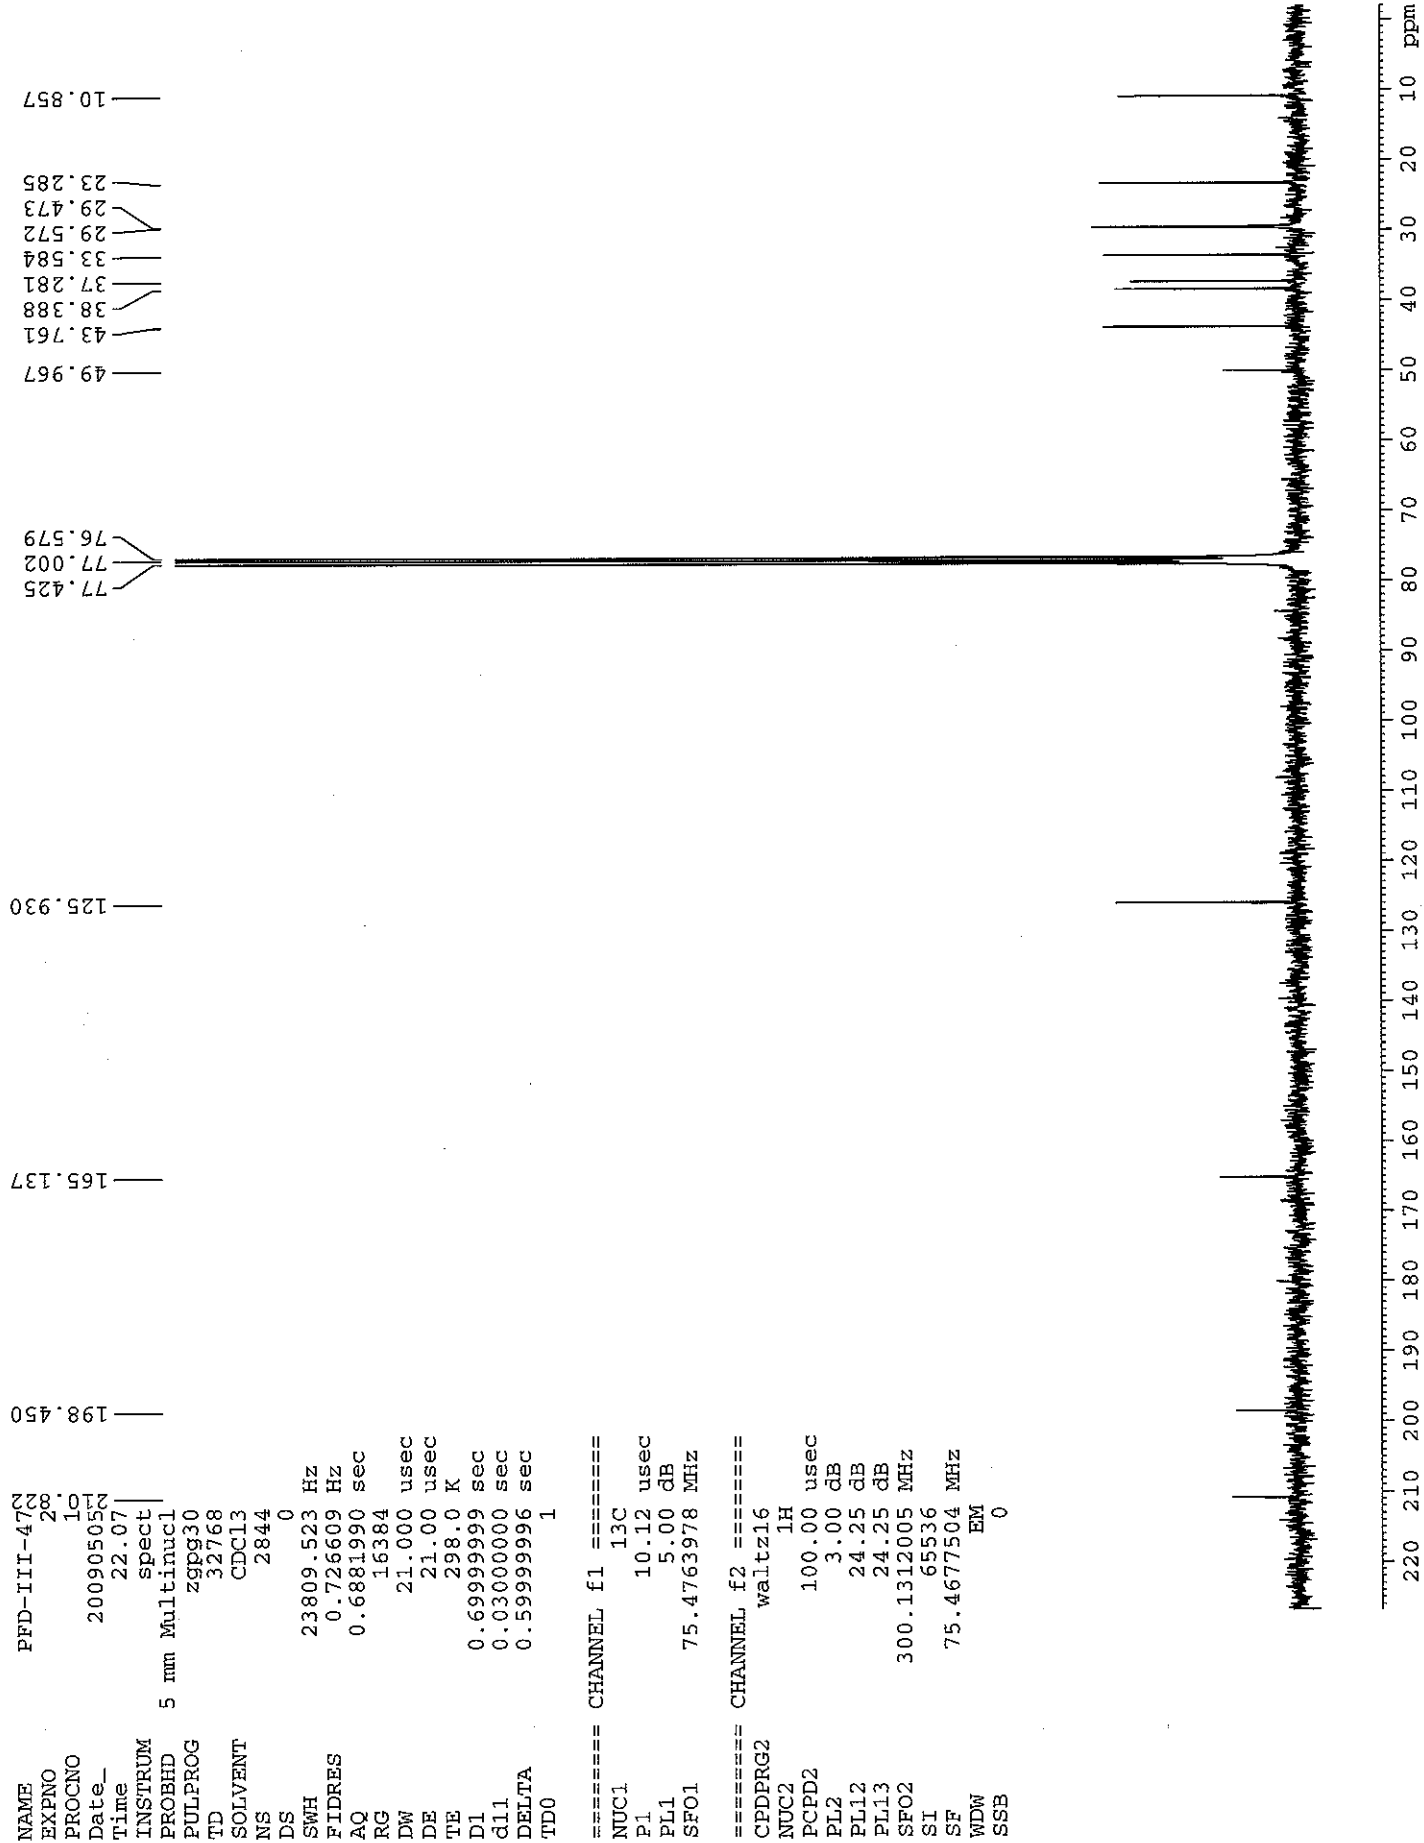

NAME PFD-III-142  
 EXPNO 1  
 PROCNO 1  
 Date\_ 20110314  
 Time 18.09  
 INSTRUM spect  
 PROBHD 5 mm PABBO BB-  
 PULPROG zg30  
 TD 32768  
 SOLVENT CDC13  
 NS 32  
 DS 0  
 SWH 6009.615 Hz  
 FIDRES 0.183399 Hz  
 AQ 2.7263477 sec  
 RG 90.5  
 DW 83.200 usec  
 DE 6.50 usec  
 TE 298.2 K  
 D1 1.00000000 sec  
 TD0 1

==== CHANNEL f1 =====  
 NUC1 1H  
 P1 9.50 usec  
 PL1 -4.00 dB  
 PL1W 26.94187927 W  
 SF01 400.1328009 MHz  
 SI 32768  
 SF 400.1300090 MHz  
 WDW EM  
 SSB 0  
 LB 0.20 Hz  
 GB 0  
 PC 1.00

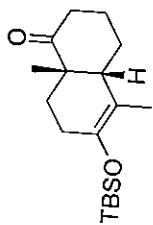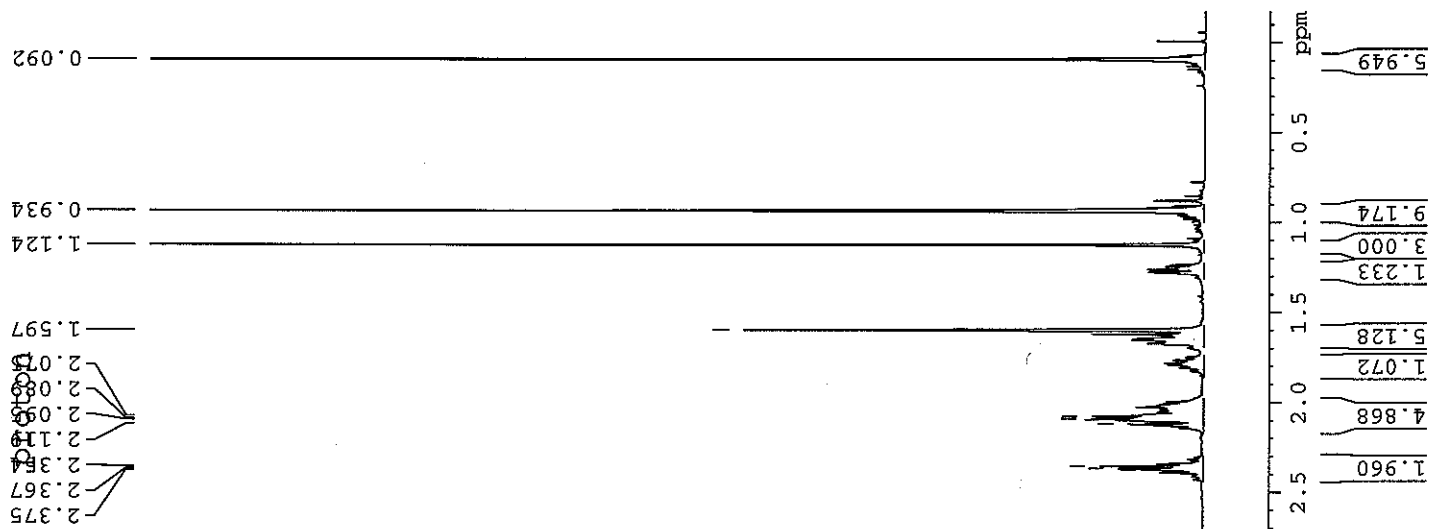

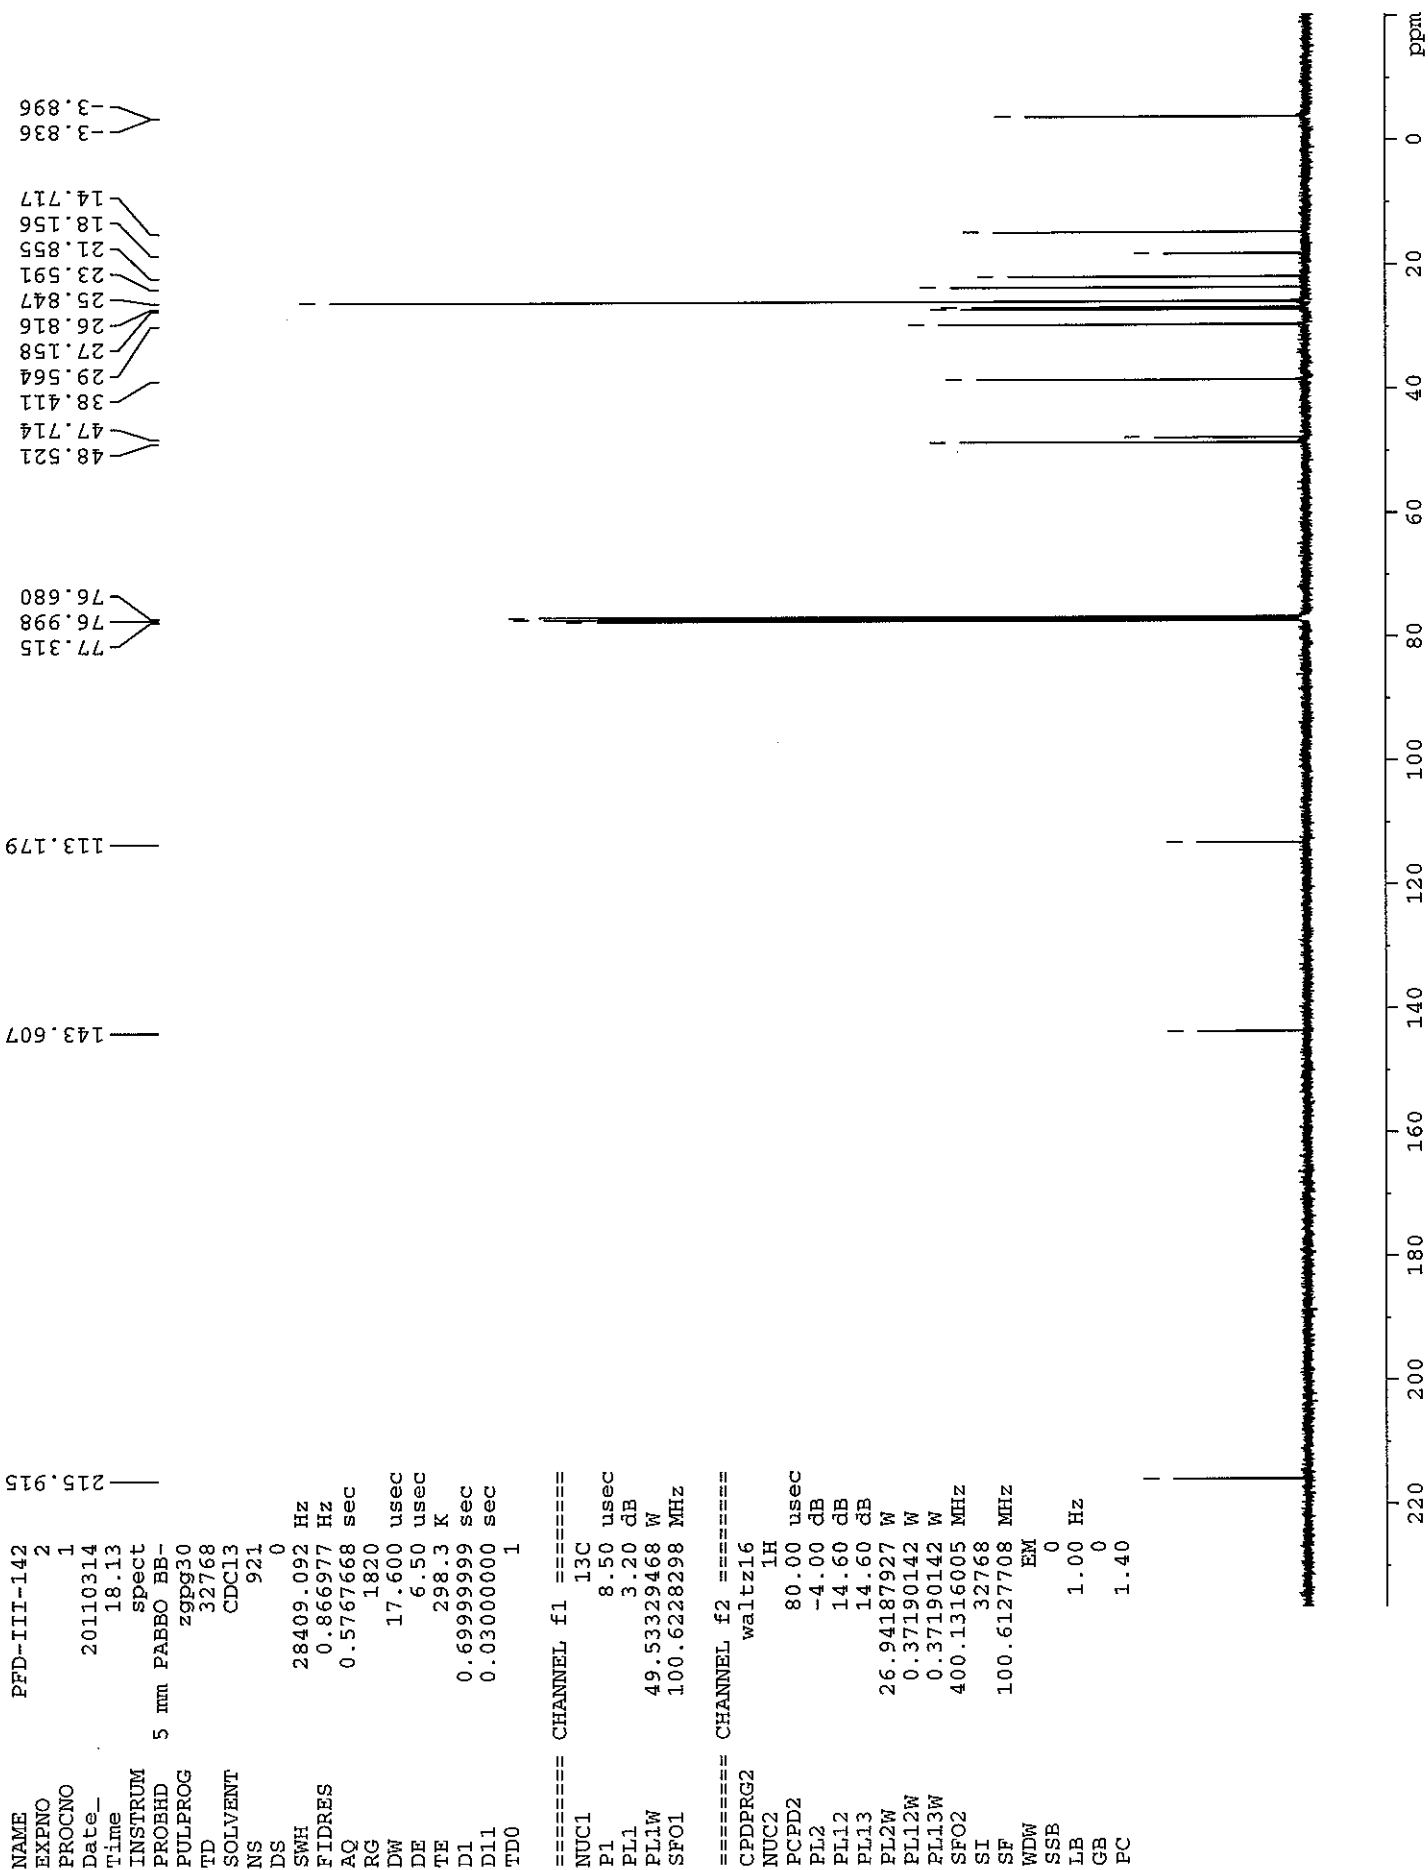

NAME PFD-III-142-R2  
 EXPNO 1  
 PROCNO 1  
 Date\_ 20110313  
 Time 18.36  
 INSTRUM spect  
 PROBD 5 mm PABBO BB-  
 PULPROG zg30  
 TD 32768  
 SOLVENT CDCl3  
 NS 32  
 DS 0  
 SWH 6009.615 Hz  
 FIDRES 0.183399 Hz  
 AQ 2.7263477 sec  
 RG 287  
 DW 83.200 usec  
 DE 6.50 usec  
 TE 298.1 K  
 D1 1.00000000 sec  
 TD0 1

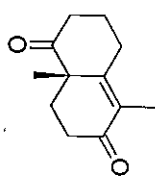

==== CHANNEL f1 =====  
 NUC1 1H  
 P1 9.50 usec  
 PL1 -4.00 dB  
 PL1W 26.94187927 W  
 SF01 400.1328009 MHz  
 SI 32768  
 SF 400.1300088 MHz  
 WDW EM  
 SSB 0  
 LB 0.20 Hz  
 GB 0  
 PC 1.00

2.897  
2.886  
2.874  
2.858  
2.846  
2.834  
2.711  
2.696  
2.685  
2.671  
2.657  
2.646  
2.631  
2.499  
2.480  
2.471  
2.457  
2.450  
1.805  
1.802  
1.413

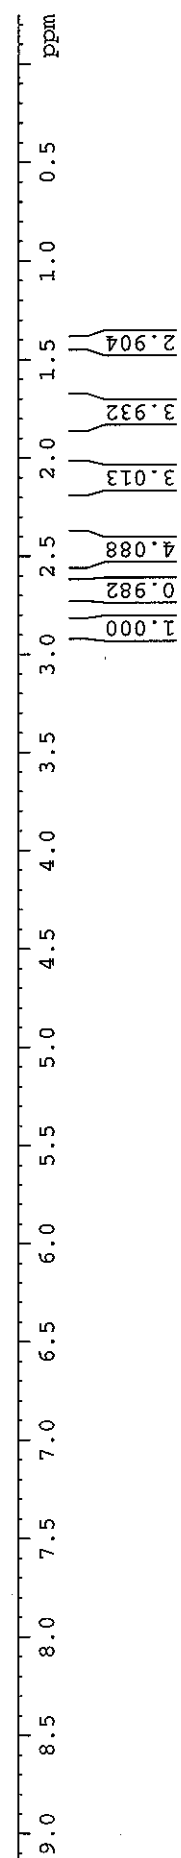

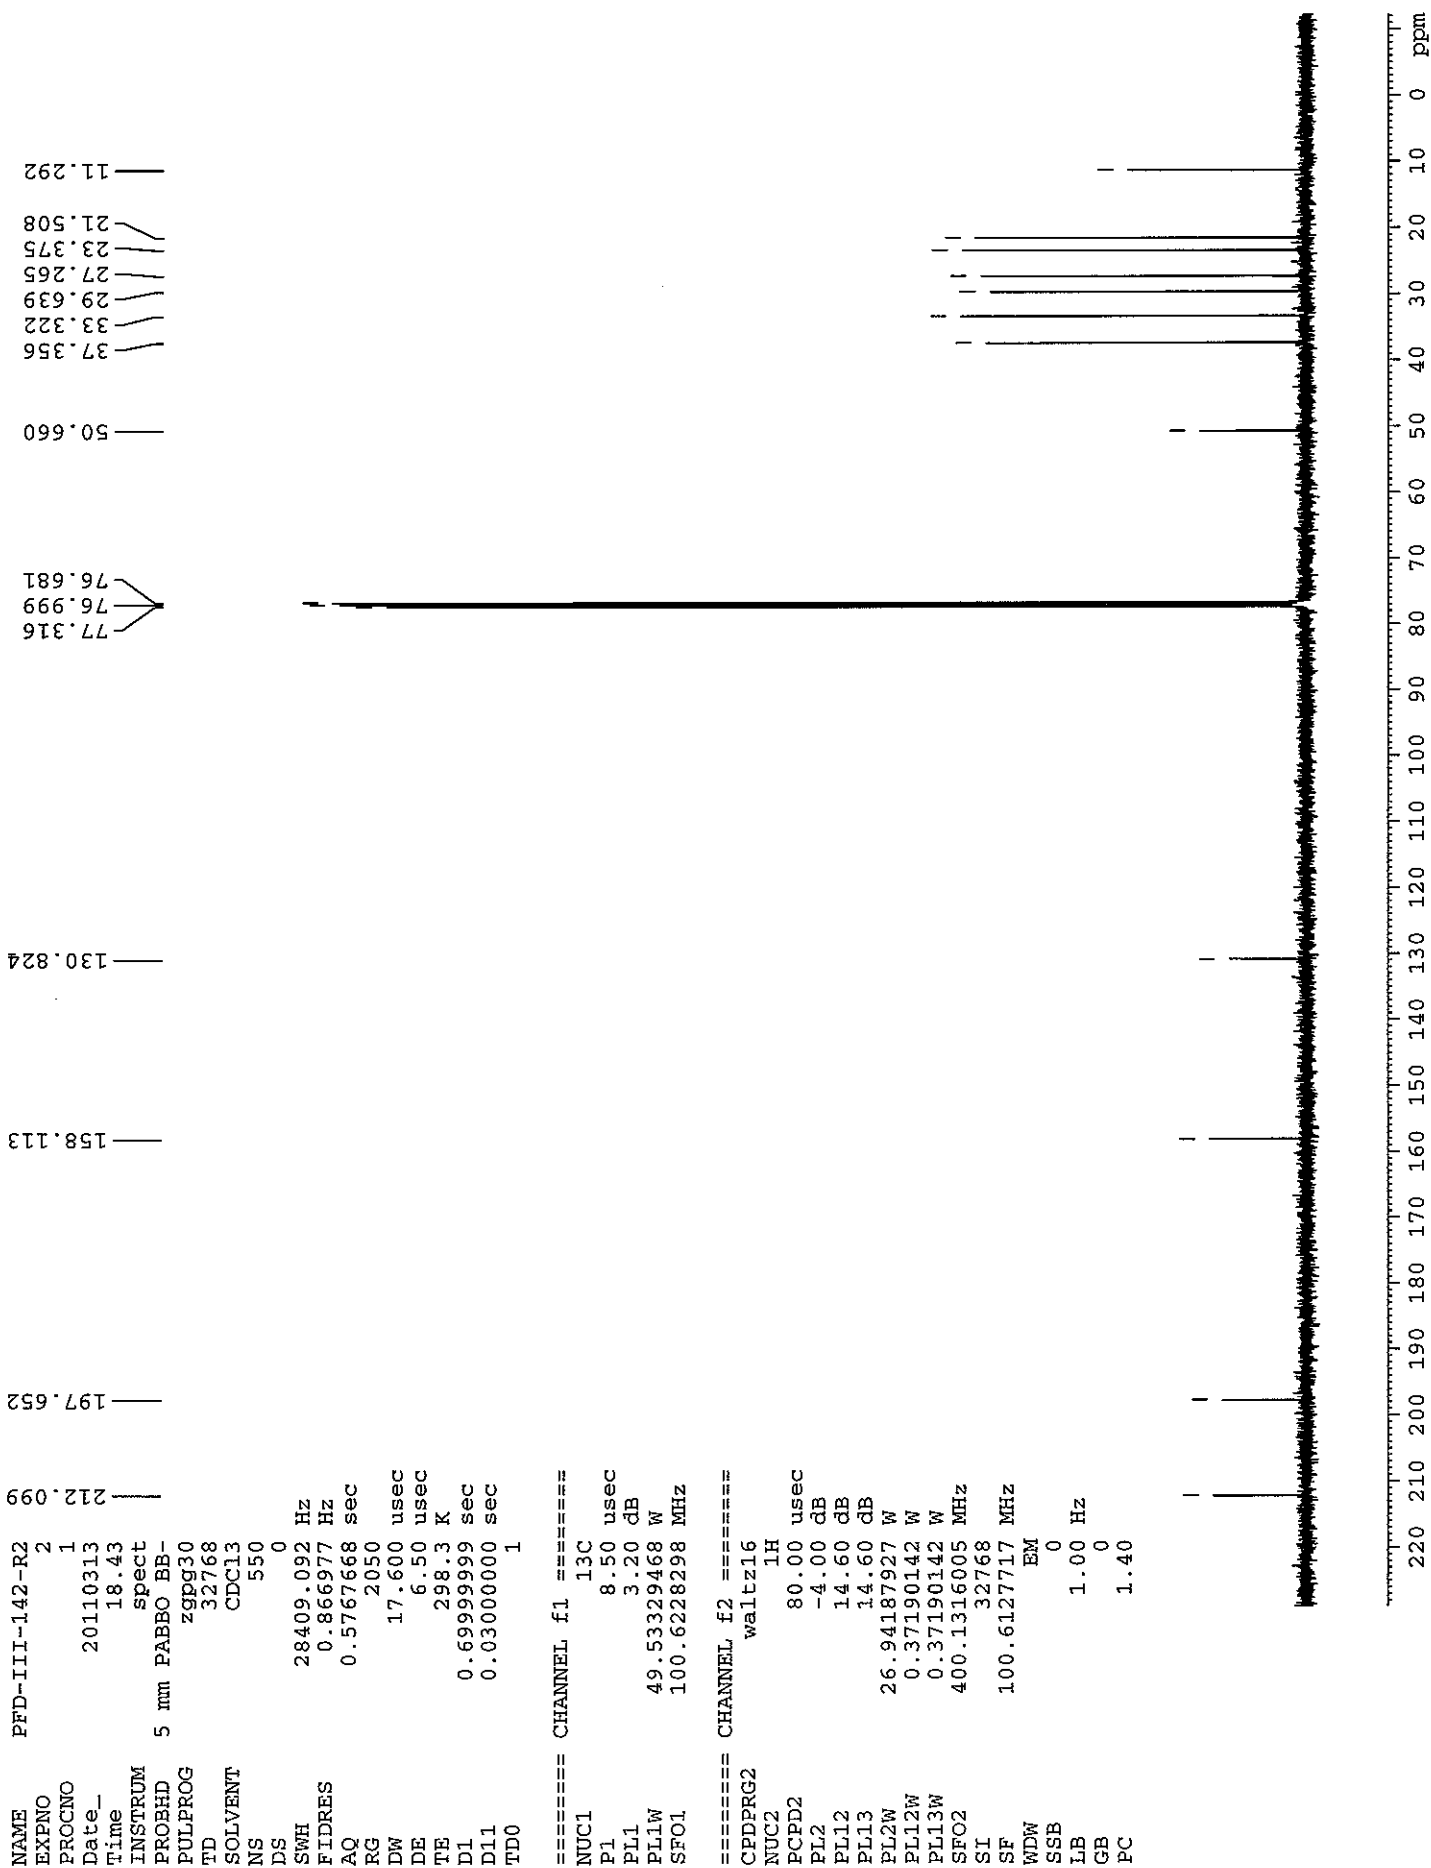



proton

Current Data Parameters  
NAME PFD-III-143-R1  
EXPNO 1  
PROCNO 1

F2 - Acquisition Parameters

Date\_ 20110409  
Time 22.56  
INSTRUM spect  
PROBHD 5 mm PABBO BB-  
PULPROG zg30  
TD 32768  
SOLVENT CDCl3  
NS 32  
DS 0  
SWH 6009.615 Hz  
FIDRES 0.183399 Hz  
AQ 2.7263477 sec  
RG 71.8  
DW 83.200 usec  
DE 6.50 usec  
TE 298.2 K  
D1 1.0000000 sec  
TD0 1

==== CHANNEL f1 =====

NUC1 1H  
P1 9.50 usec  
PL1 -4.00 dB  
PL1W 26.94187927 W  
SFO1 400.1328009 MHz

F2 - Processing parameters

SI 32768  
SF 400.1300000 MHz  
WDW EM  
SSB 0  
LB 0.20 Hz  
GB 0  
PC 1.40

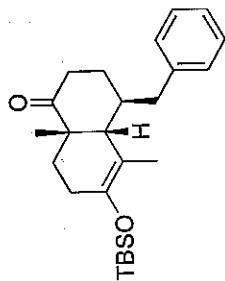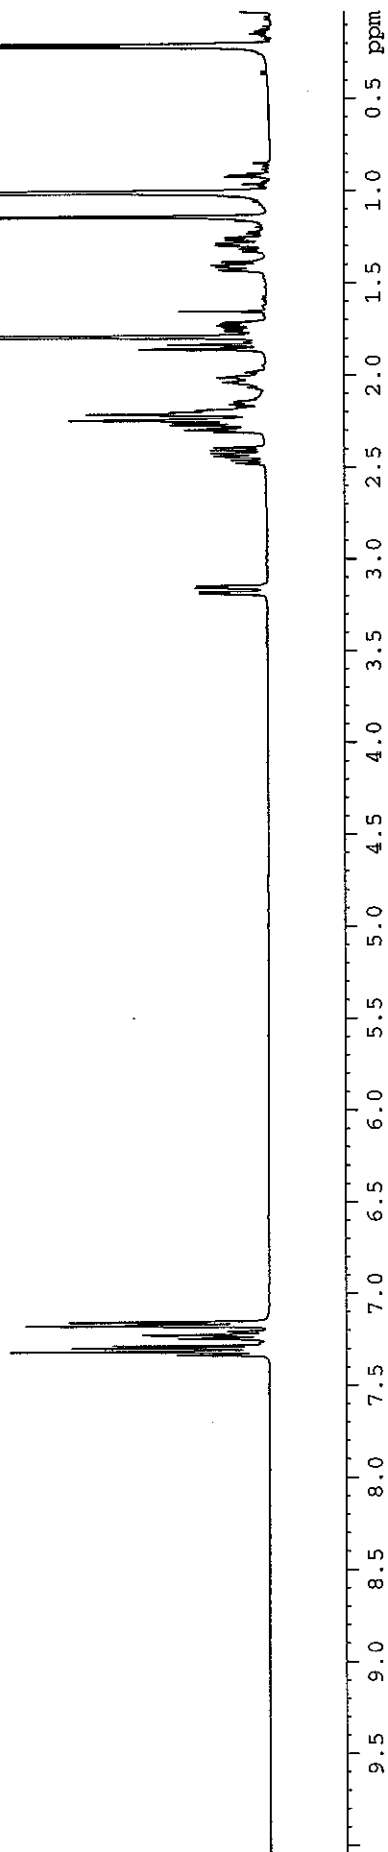

Current Data Parameters  
 NAME PFD-III-143-R1  
 EXPNO 2  
 PROCNO 1  
 216.198

F2 - Acquisition Parameters  
 Date\_ 20110409  
 Time 23.03  
 INSTRUM spect  
 PROBHD 5 mm PABBO BB-  
 PULPROG zgpg30  
 TD 32768  
 SOLVENT CDCl3  
 NS 172  
 DS 0  
 SWH 28409.092 Hz  
 FIDRES 0.866977 Hz  
 AQ 0.5767668 sec  
 RG 2050  
 DW 17.600 usec  
 DE 6.50 usec  
 TE 298.5 K  
 D1 0.69999999 sec  
 D11 0.03000000 sec  
 TD0 1

==== CHANNEL f1 =====  
 NUC1 13C  
 P1 8.50 usec  
 PL1 3.20 dB  
 PL1W 49.53329468 W  
 SFO1 100.6228298 MHz

==== CHANNEL f2 =====  
 CPDPRG2 waltz16  
 NUC2 1H  
 PCPD2 80.00 usec  
 PL2 -4.00 dB  
 PL12 14.60 dB  
 PL13 14.60 dB  
 PL2W 26.94187927 W  
 PL12W 0.37190142 W  
 PL13W 0.37190142 W  
 SFO2 400.1316005 MHz

F2 - Processing parameters  
 SI 32768  
 SF 100.6127725 MHz  
 WDW EM  
 SSB 0  
 LB 1.00 Hz  
 GB 0  
 PC 1.40

144.230  
 141.006  
 129.031  
 128.323  
 125.957  
 113.413  
 55.232  
 48.333  
 43.579  
 41.078  
 37.061  
 29.204  
 28.979  
 26.798  
 25.899  
 19.890  
 19.652  
 18.286  
 3.622  
 3.722

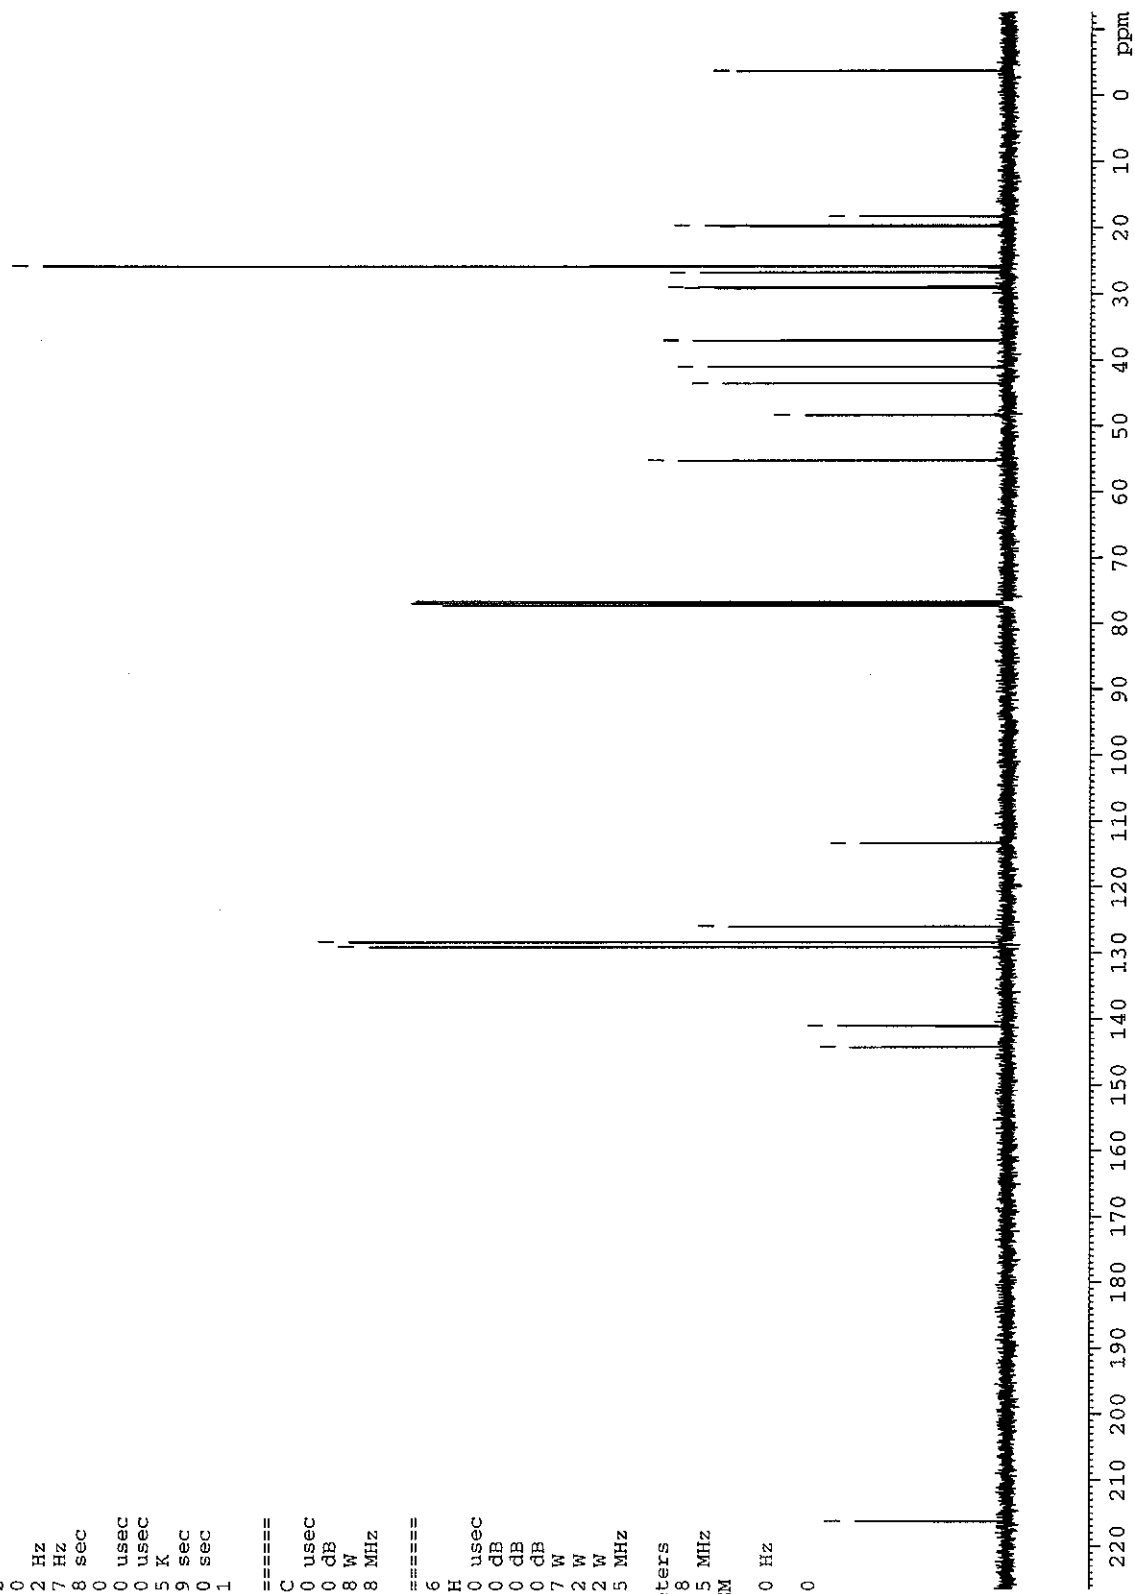

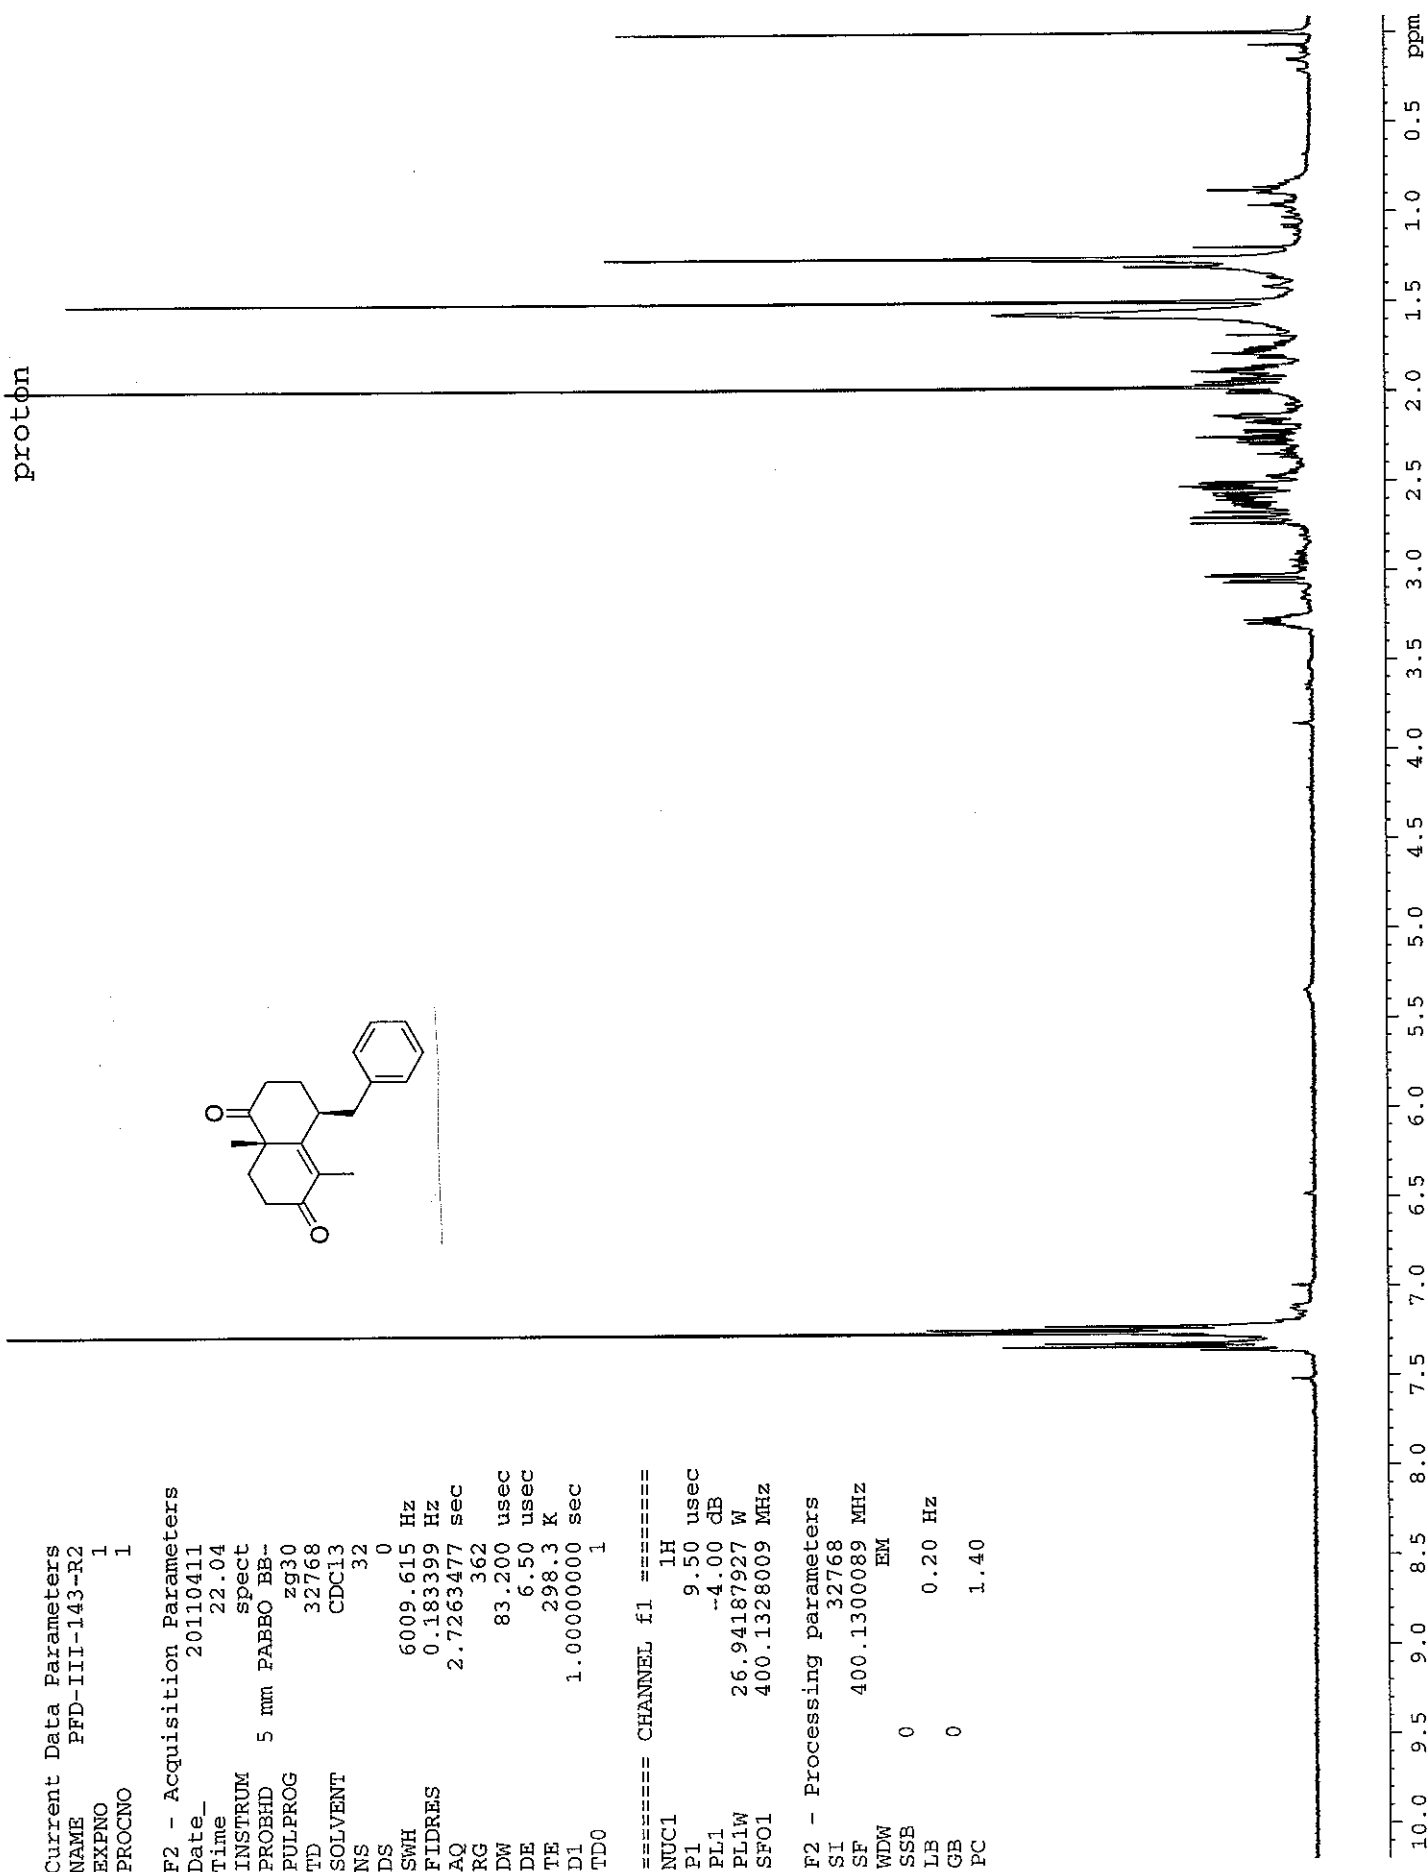

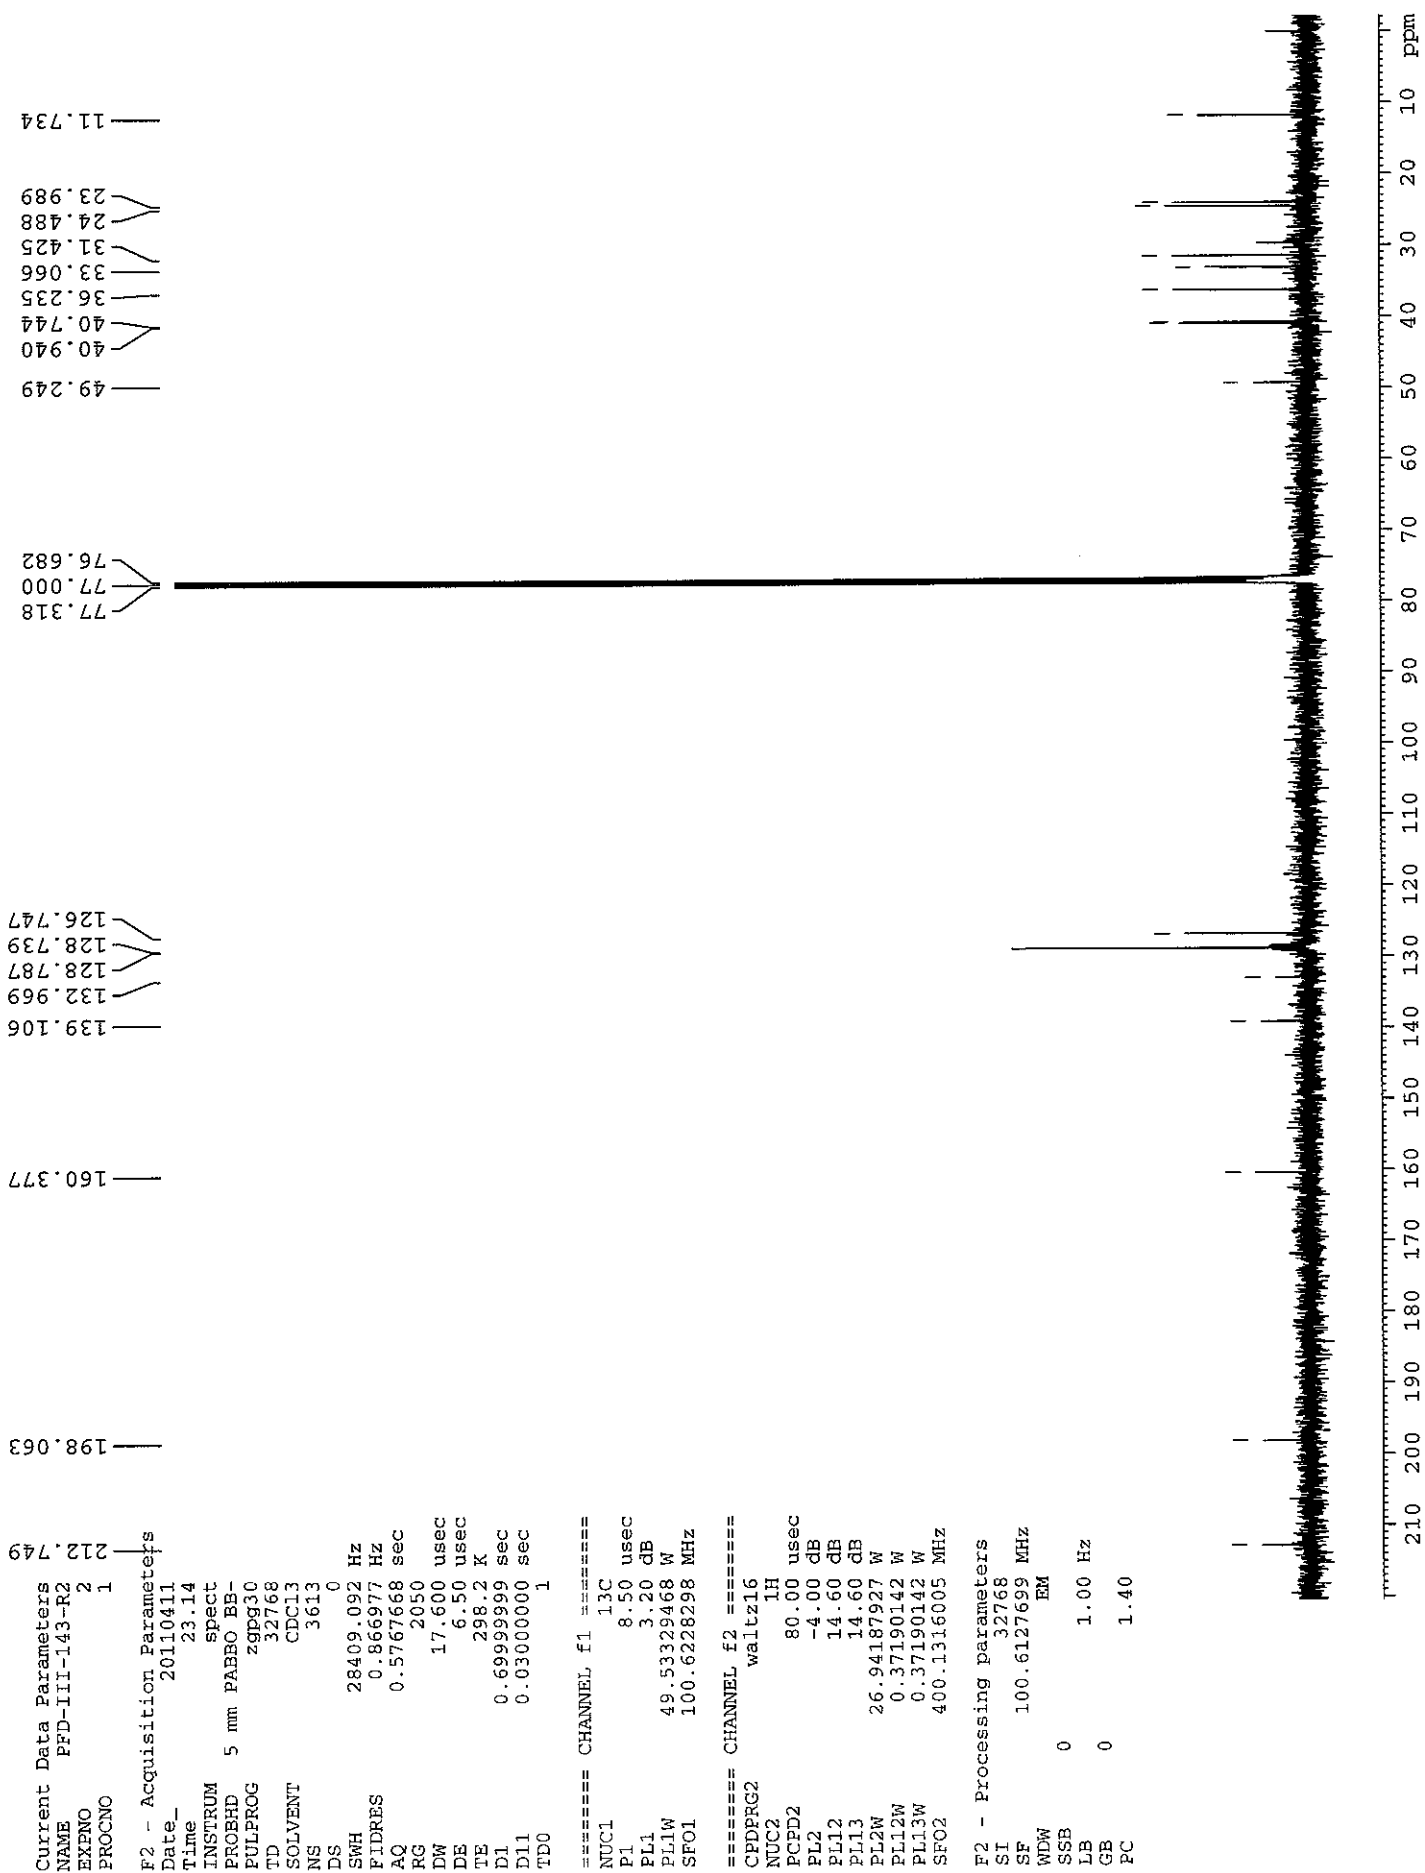

PFD-III-20B-R1/1  
Proton

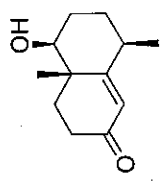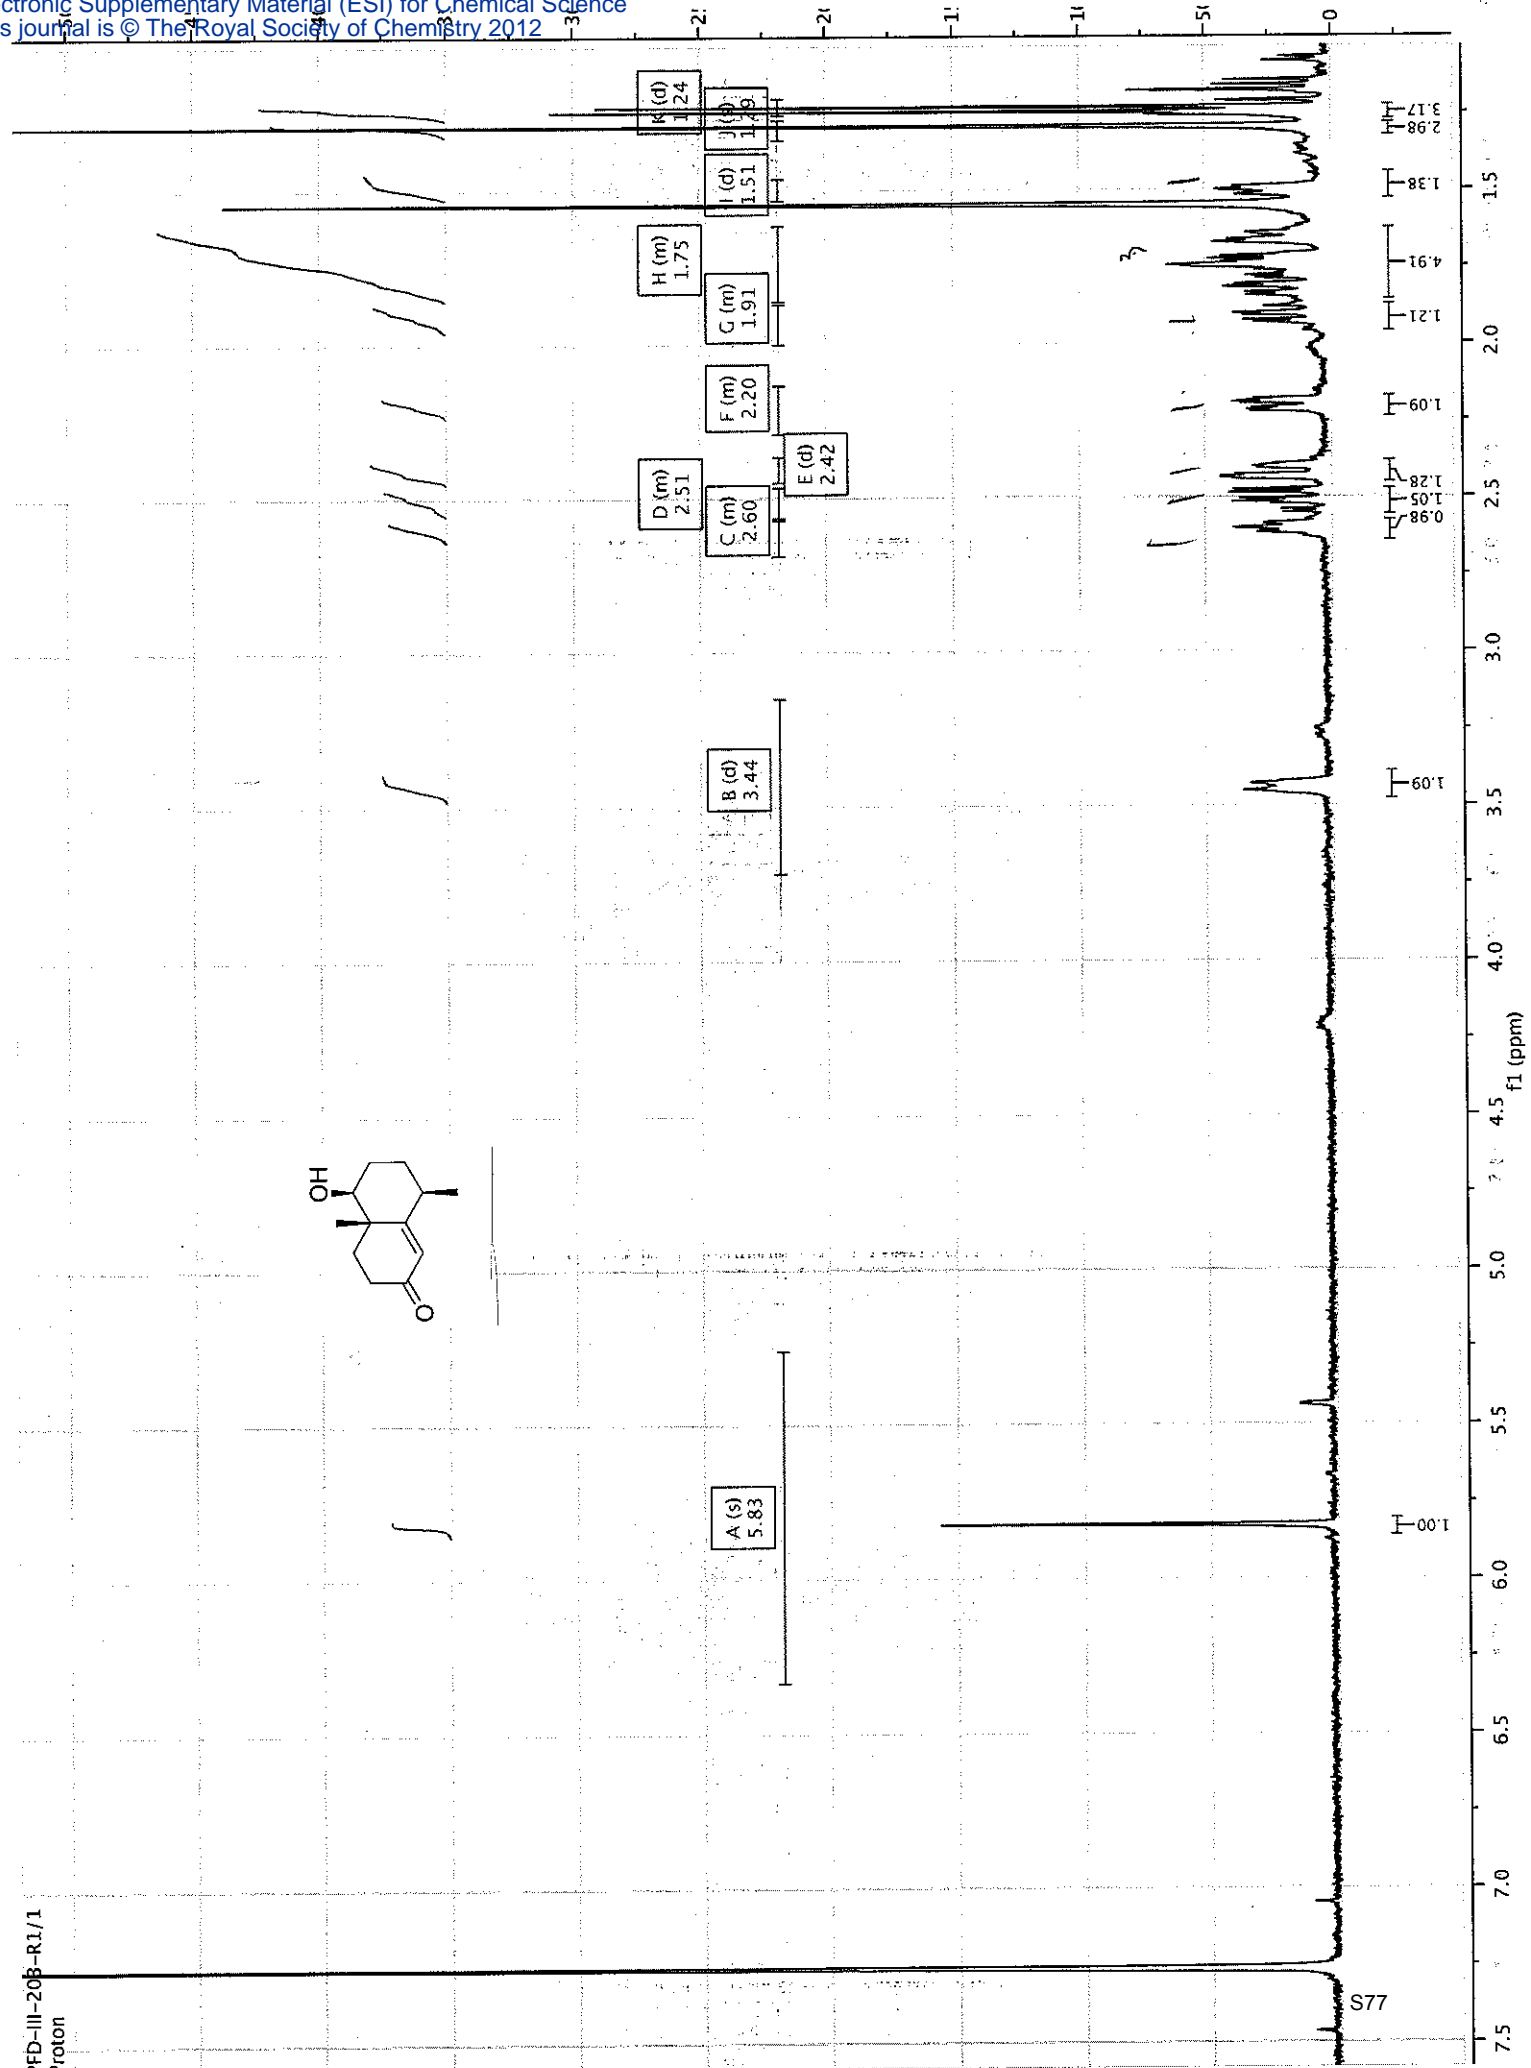

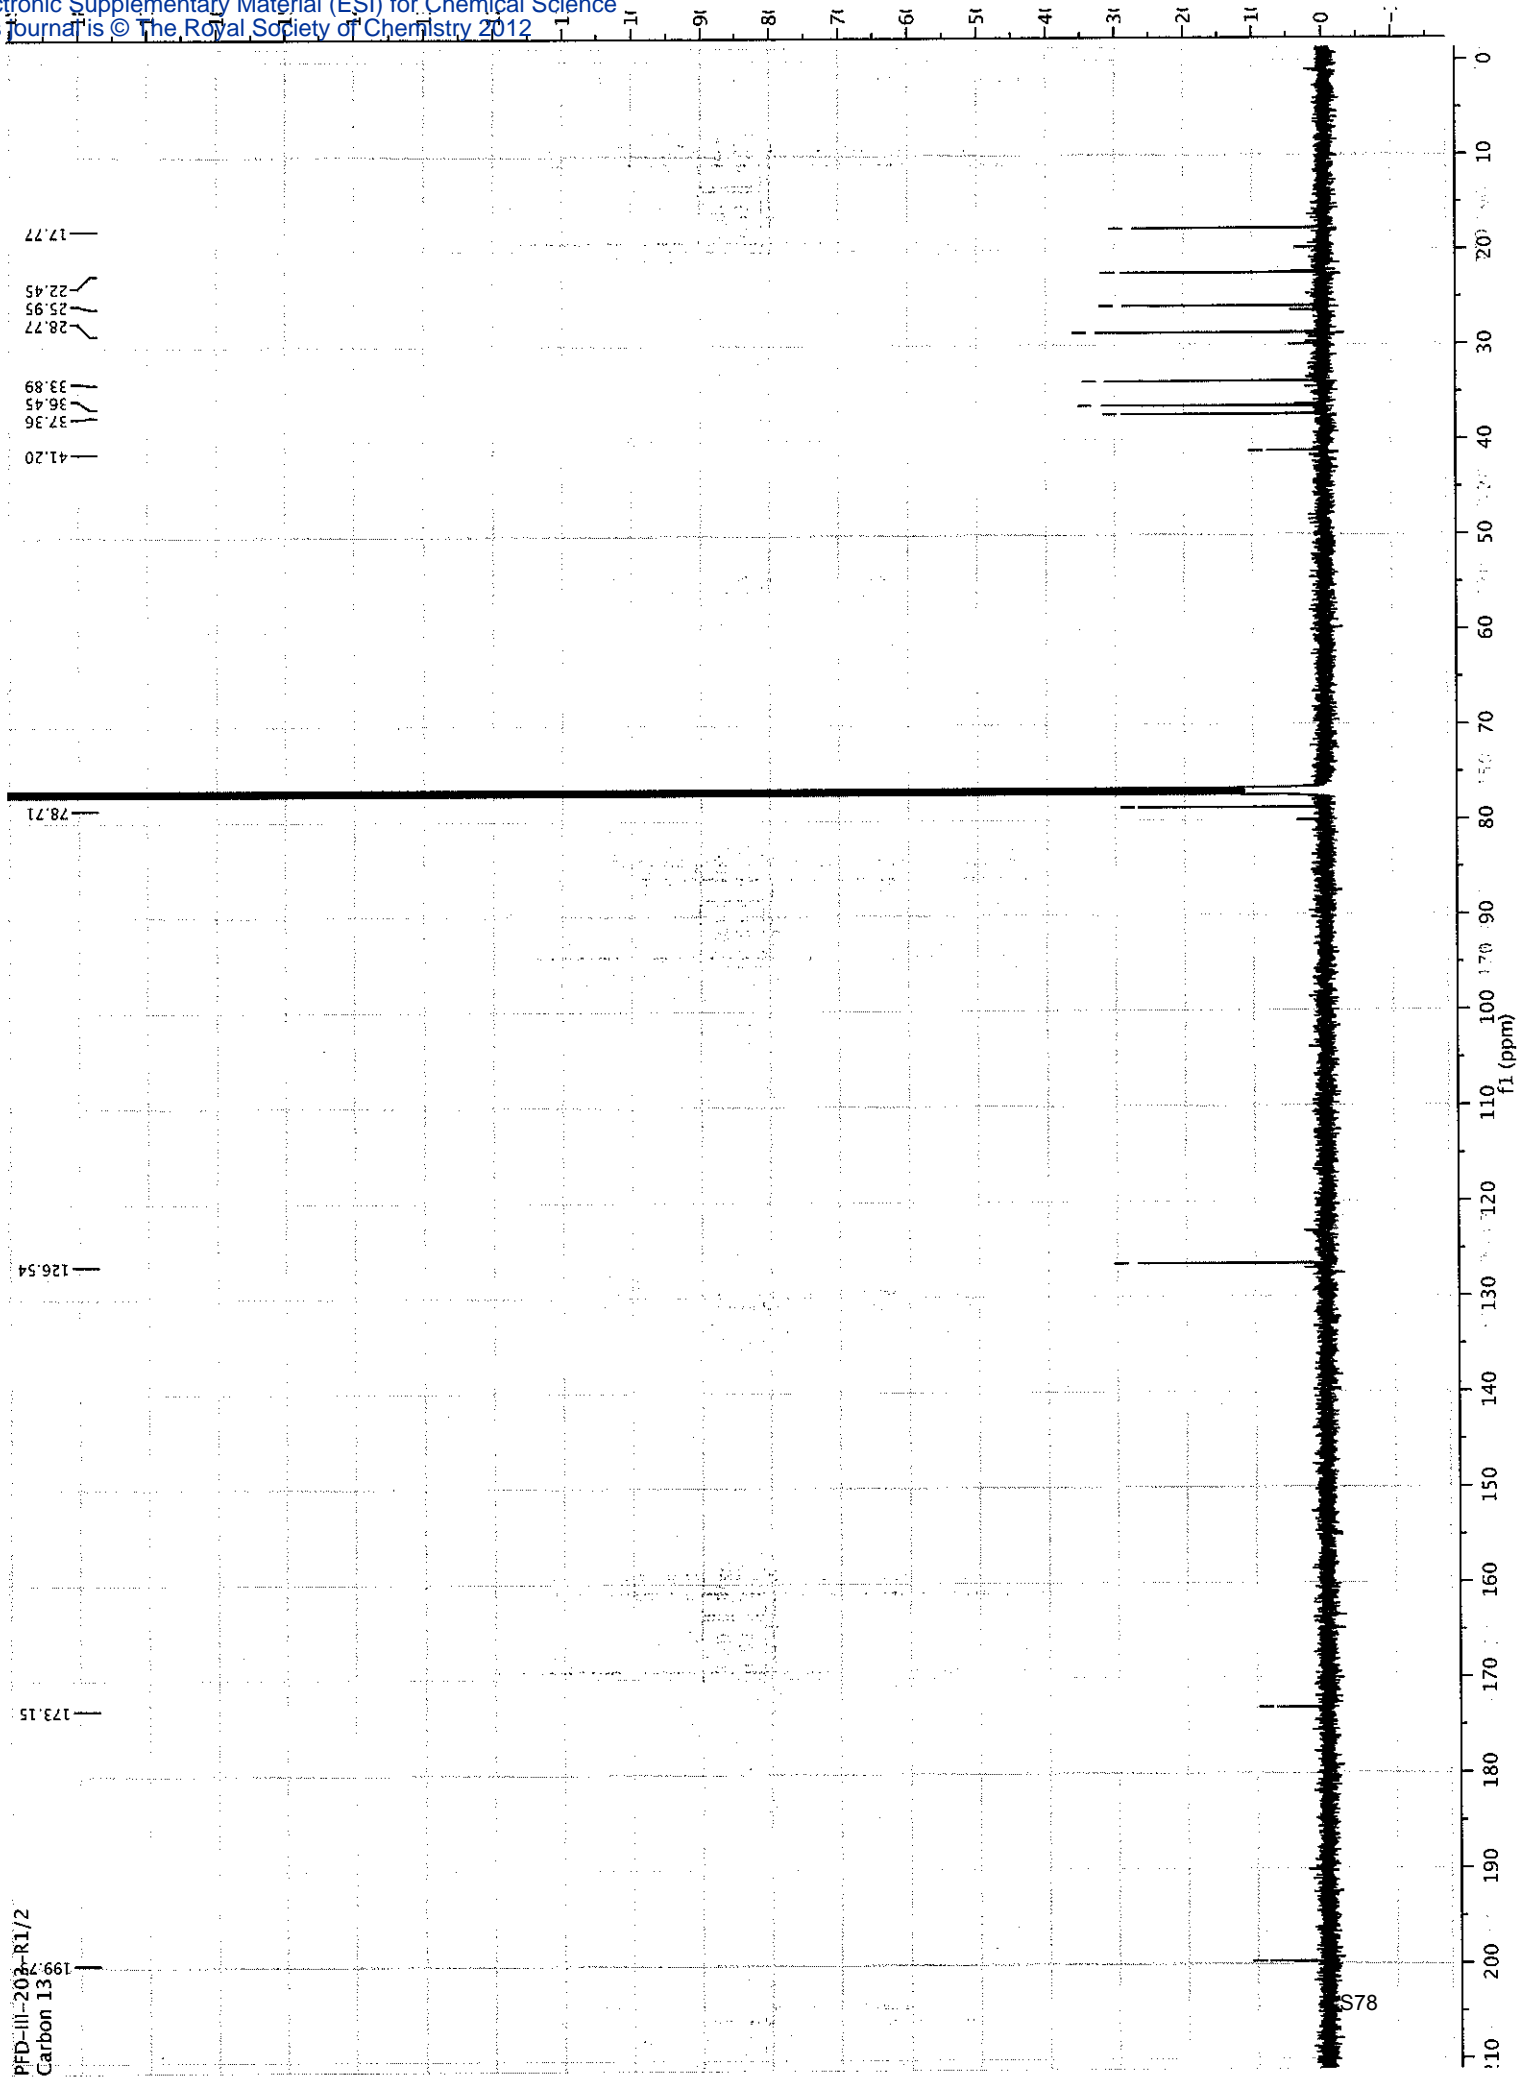

PFD-III-202-R1/2

Carbon 13

S78

PFD-III-203-R2  
Proton

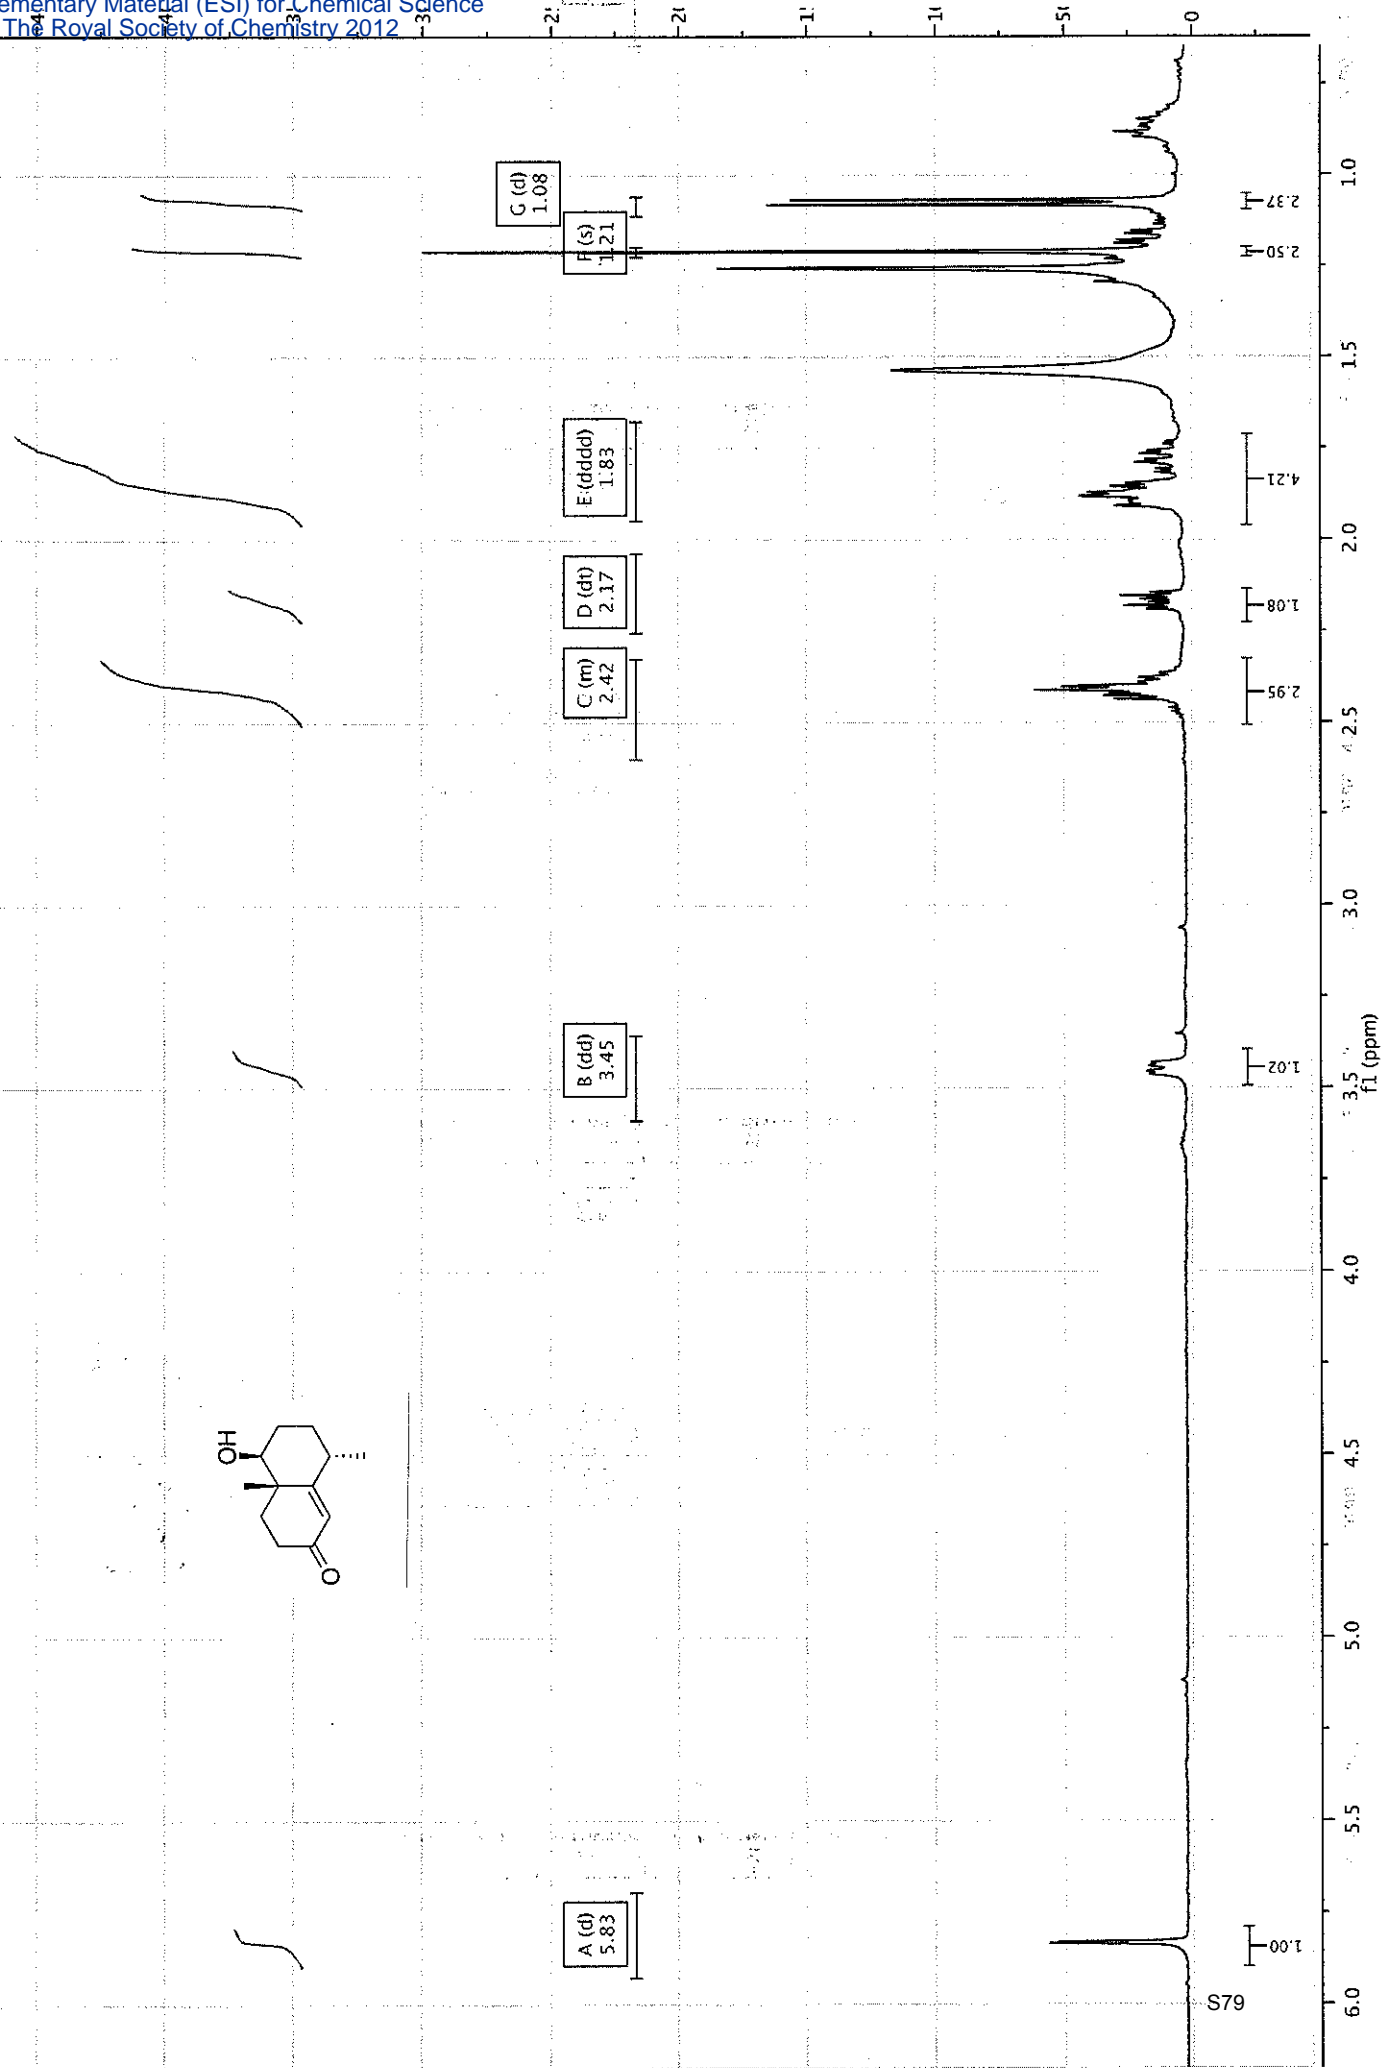

6.78

1.00

5.83

3.45

2.42

2.17

1.83

1.21

1.08

2.95

1.08

4.21

2.50

2.37

1.0

1.5

2.0

2.5

3.0

3.5

4.0

4.5

5.0

5.5

6.0

f1 (ppm)

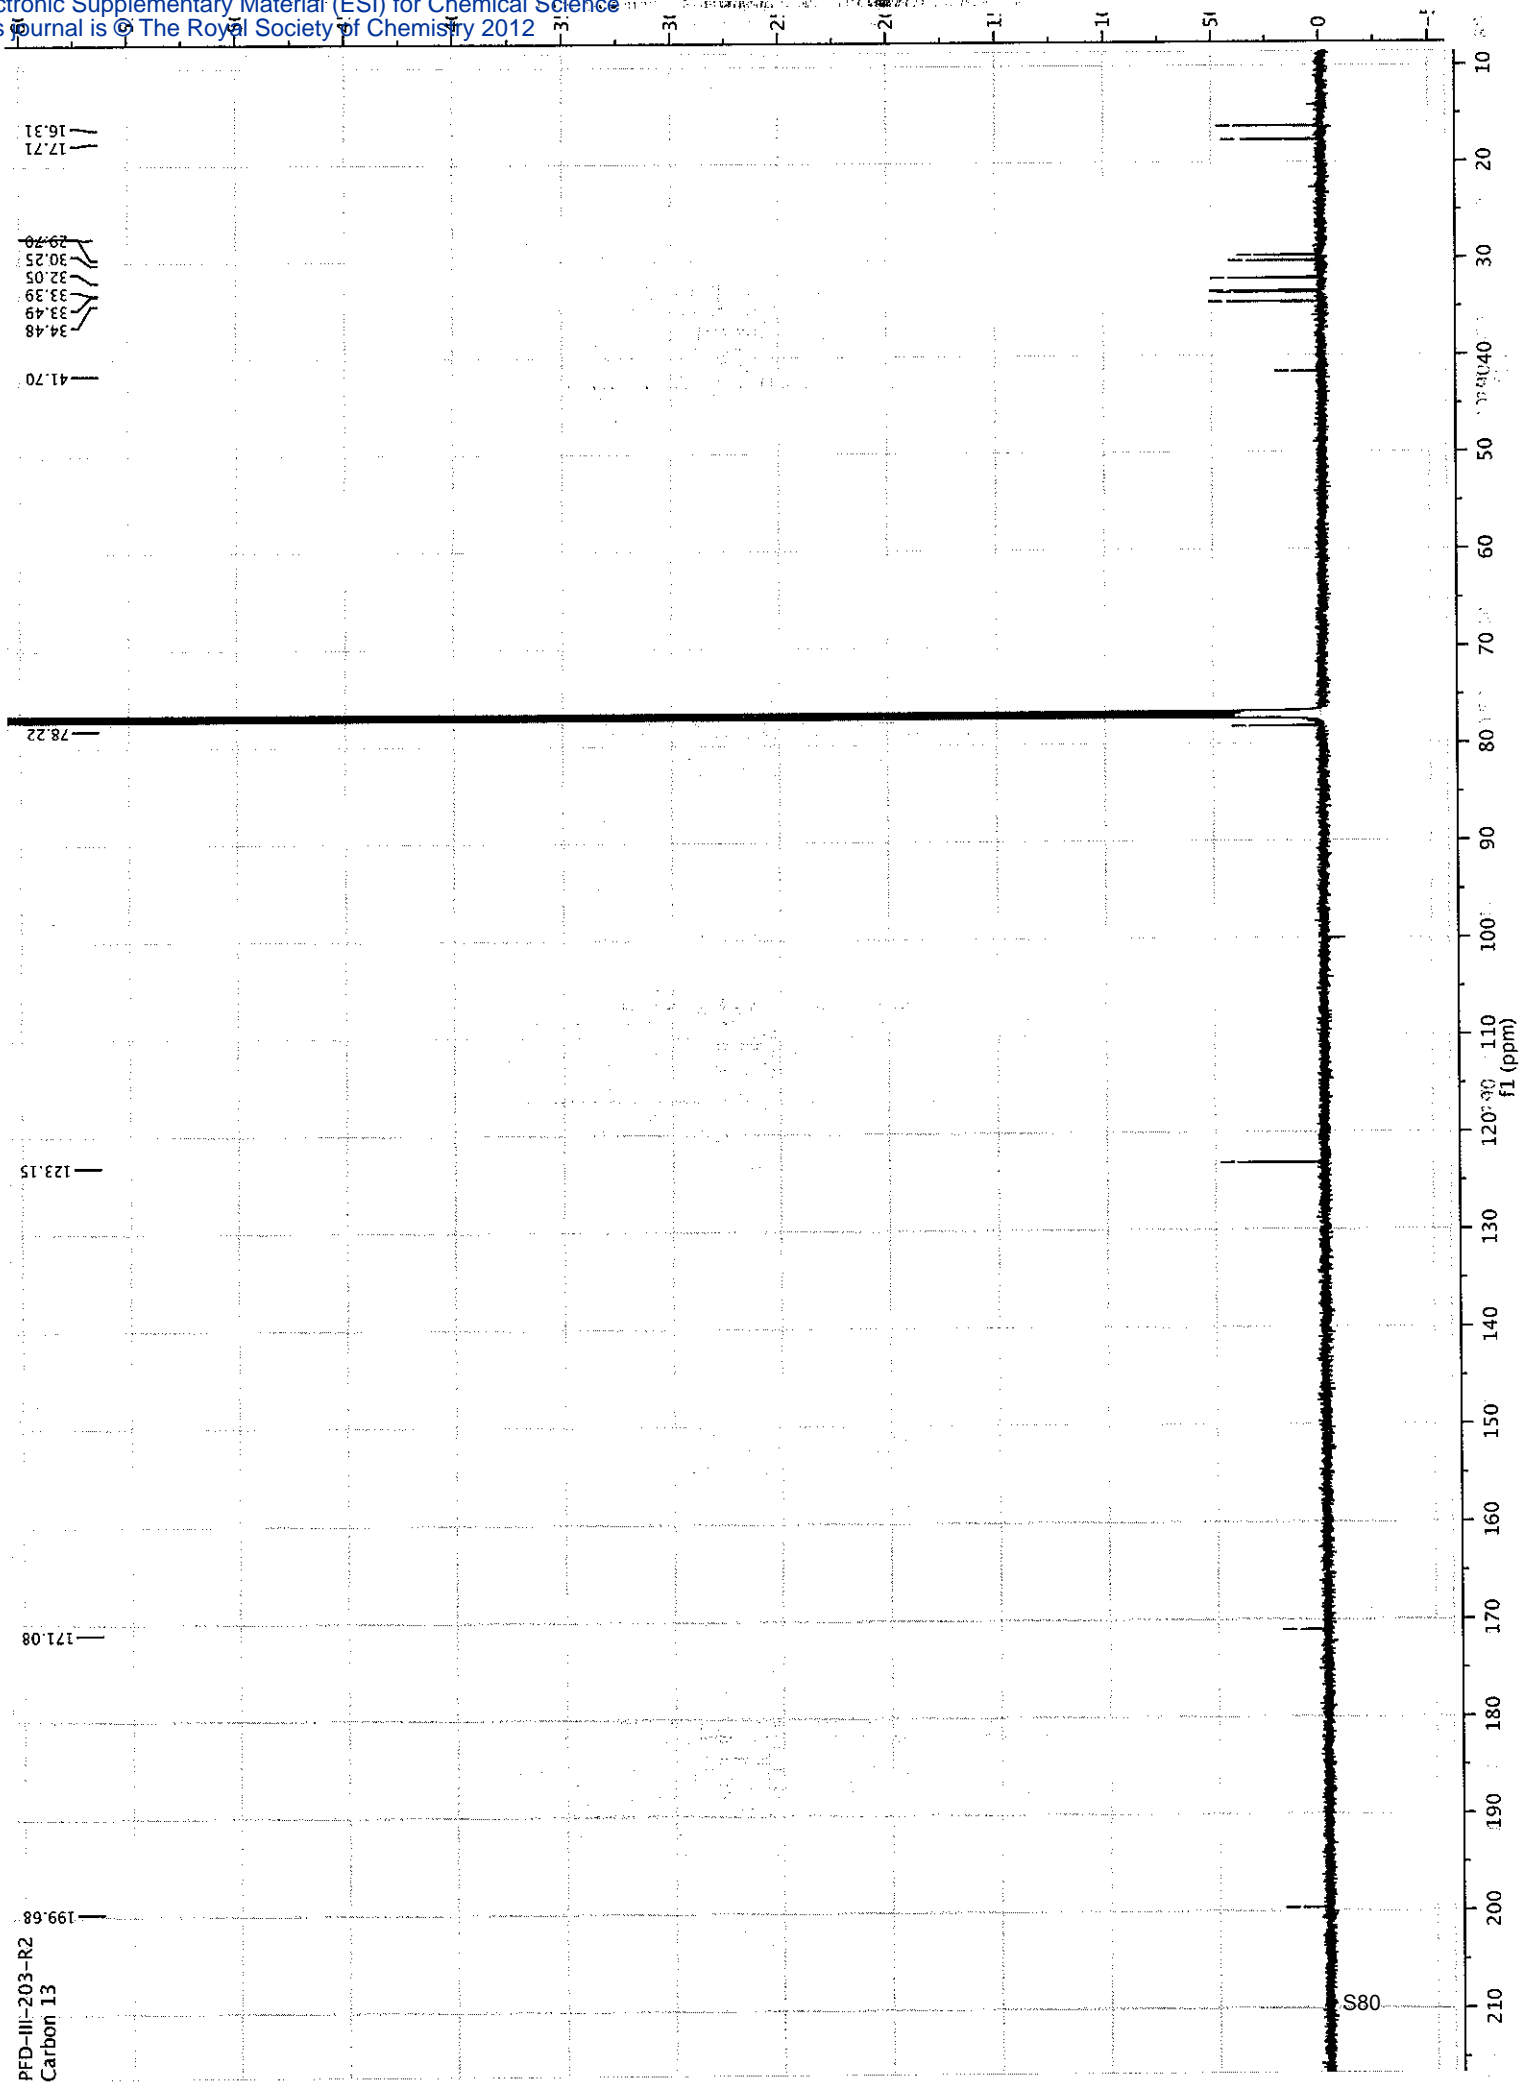

PFD-III-203-R2  
Carbon 13

S80



NAME PFD-III-128  
 EXPNO 1  
 PROCNO 1  
 Date\_ 20110210  
 Time 21.31  
 INSTRUM spect  
 PROBHD 5 mm PABBI 1H/  
 PULPROG zg30  
 TD 32768  
 SOLVENT CDCl3  
 NS 17  
 DS 0  
 SWH 6009.615 Hz  
 FIDRES 0.183399 Hz  
 AQ 2.7263477 sec  
 RG 114  
 DW 83.200 usec  
 DE 6.50 usec  
 TE 300.3 K  
 D1 1.00000000 sec  
 TD0 1

==== CHANNEL f1 =====  
 NUC1 1H  
 P1 7.25 usec  
 PL1 0.00 dB  
 PL1W 12.20776844 W  
 SF01 399.9225995 MHz  
 SI 32768  
 SF 399.9200112 MHz  
 WDW EM  
 SSB 0  
 LB 0.20 Hz  
 GB 0  
 PC 1.00

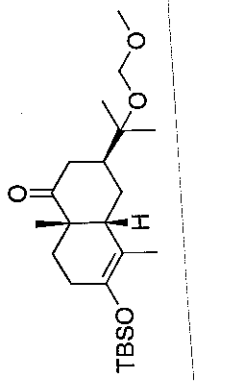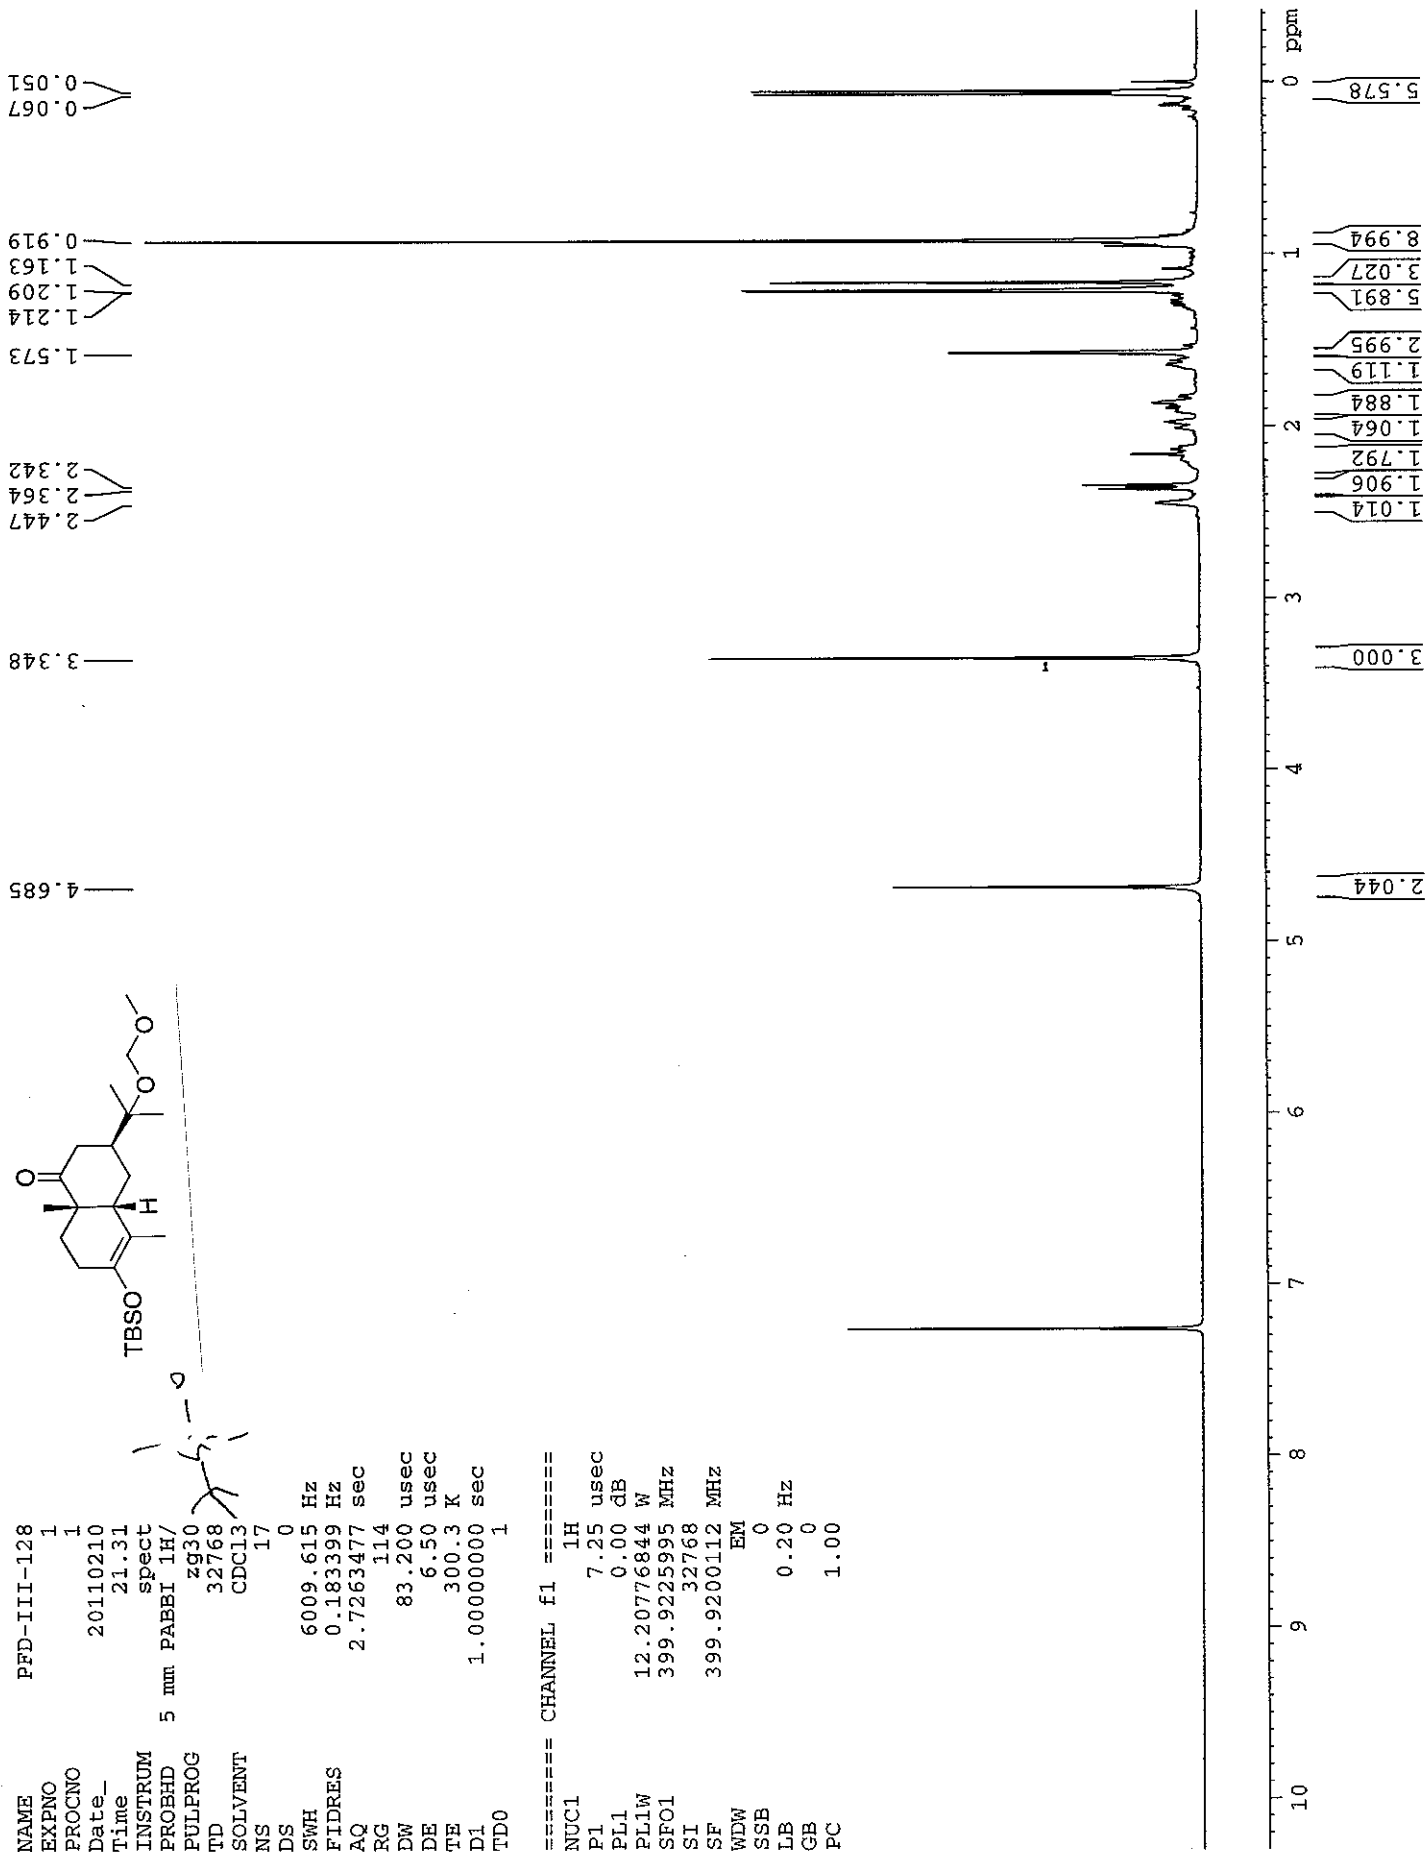

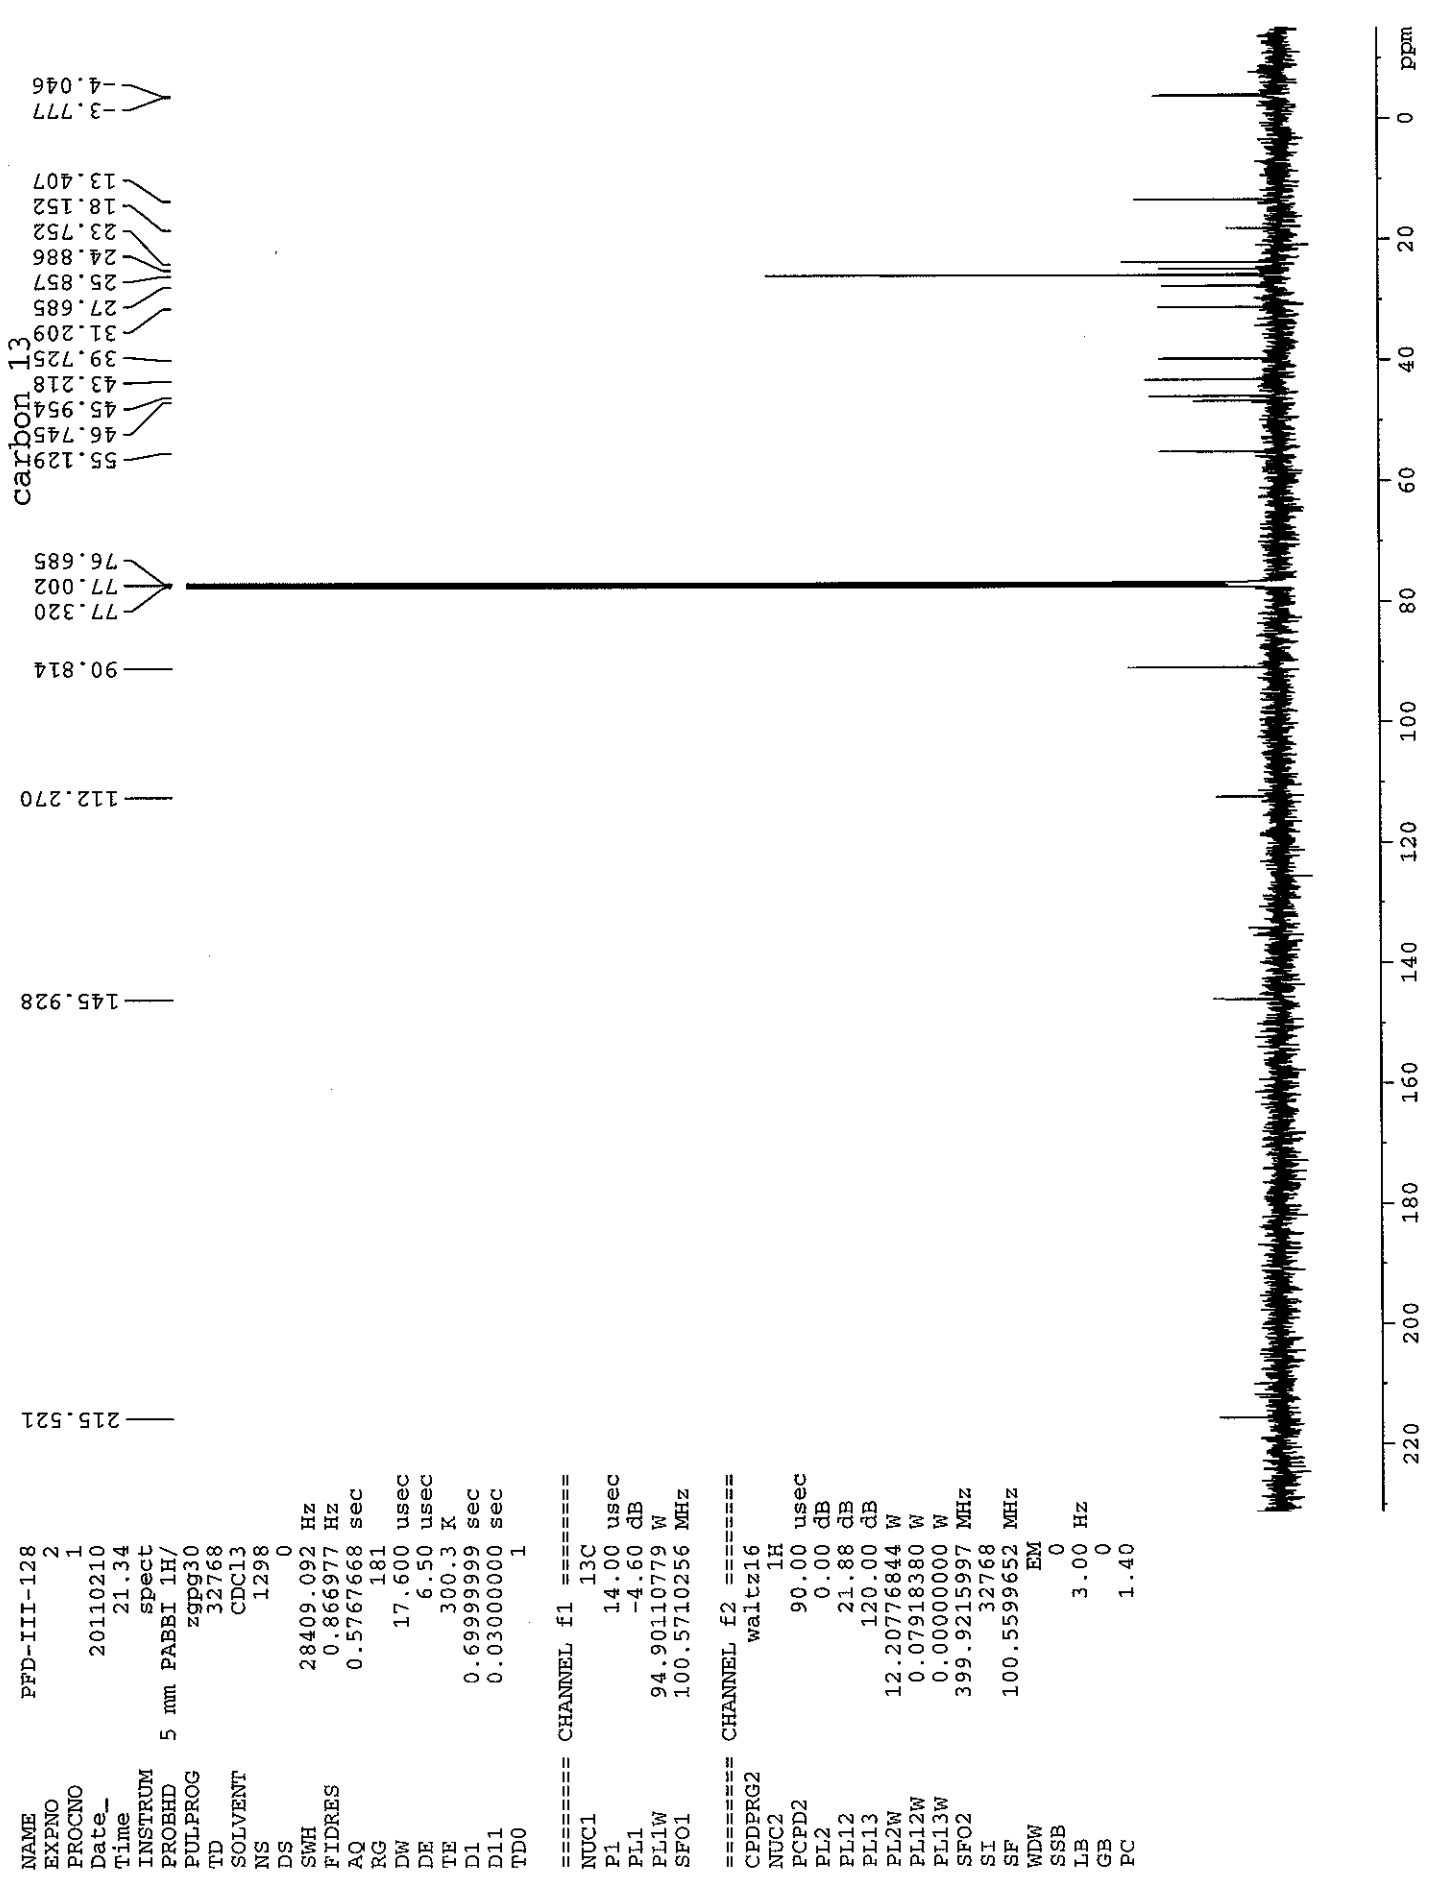

NAME PFD-III-129  
EXPNO 1  
PROCNO 1  
Date\_ 20110403  
Time 21.47  
INSTRUM spect  
PROBHD 5 mm PABBO BB-  
PULPROG zg30  
TD 32768  
SOLVENT CDCl3  
NS 32  
DS 0  
SWH 6009.615 Hz  
FIDRES 0.183399 Hz  
AQ 2.7263477 sec  
RG 512  
DW 83.200 usec  
DE 6.50 usec  
TE 300.2 K  
D1 1.00000000 sec  
TD0 1

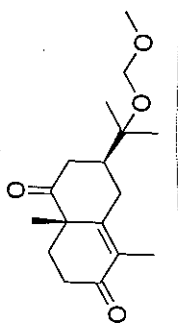

==== CHANNEL f1 =====  
NUC1 1H  
P1 9.50 usec  
PL1 -4.00 dB  
PLLW 26.94187927 W  
SF01 400.1328009 MHz  
SI 32768  
SF 400.1300087 MHz  
WDW EM  
SSB 0  
LB 0.20 Hz  
GB 0  
PC 1.00

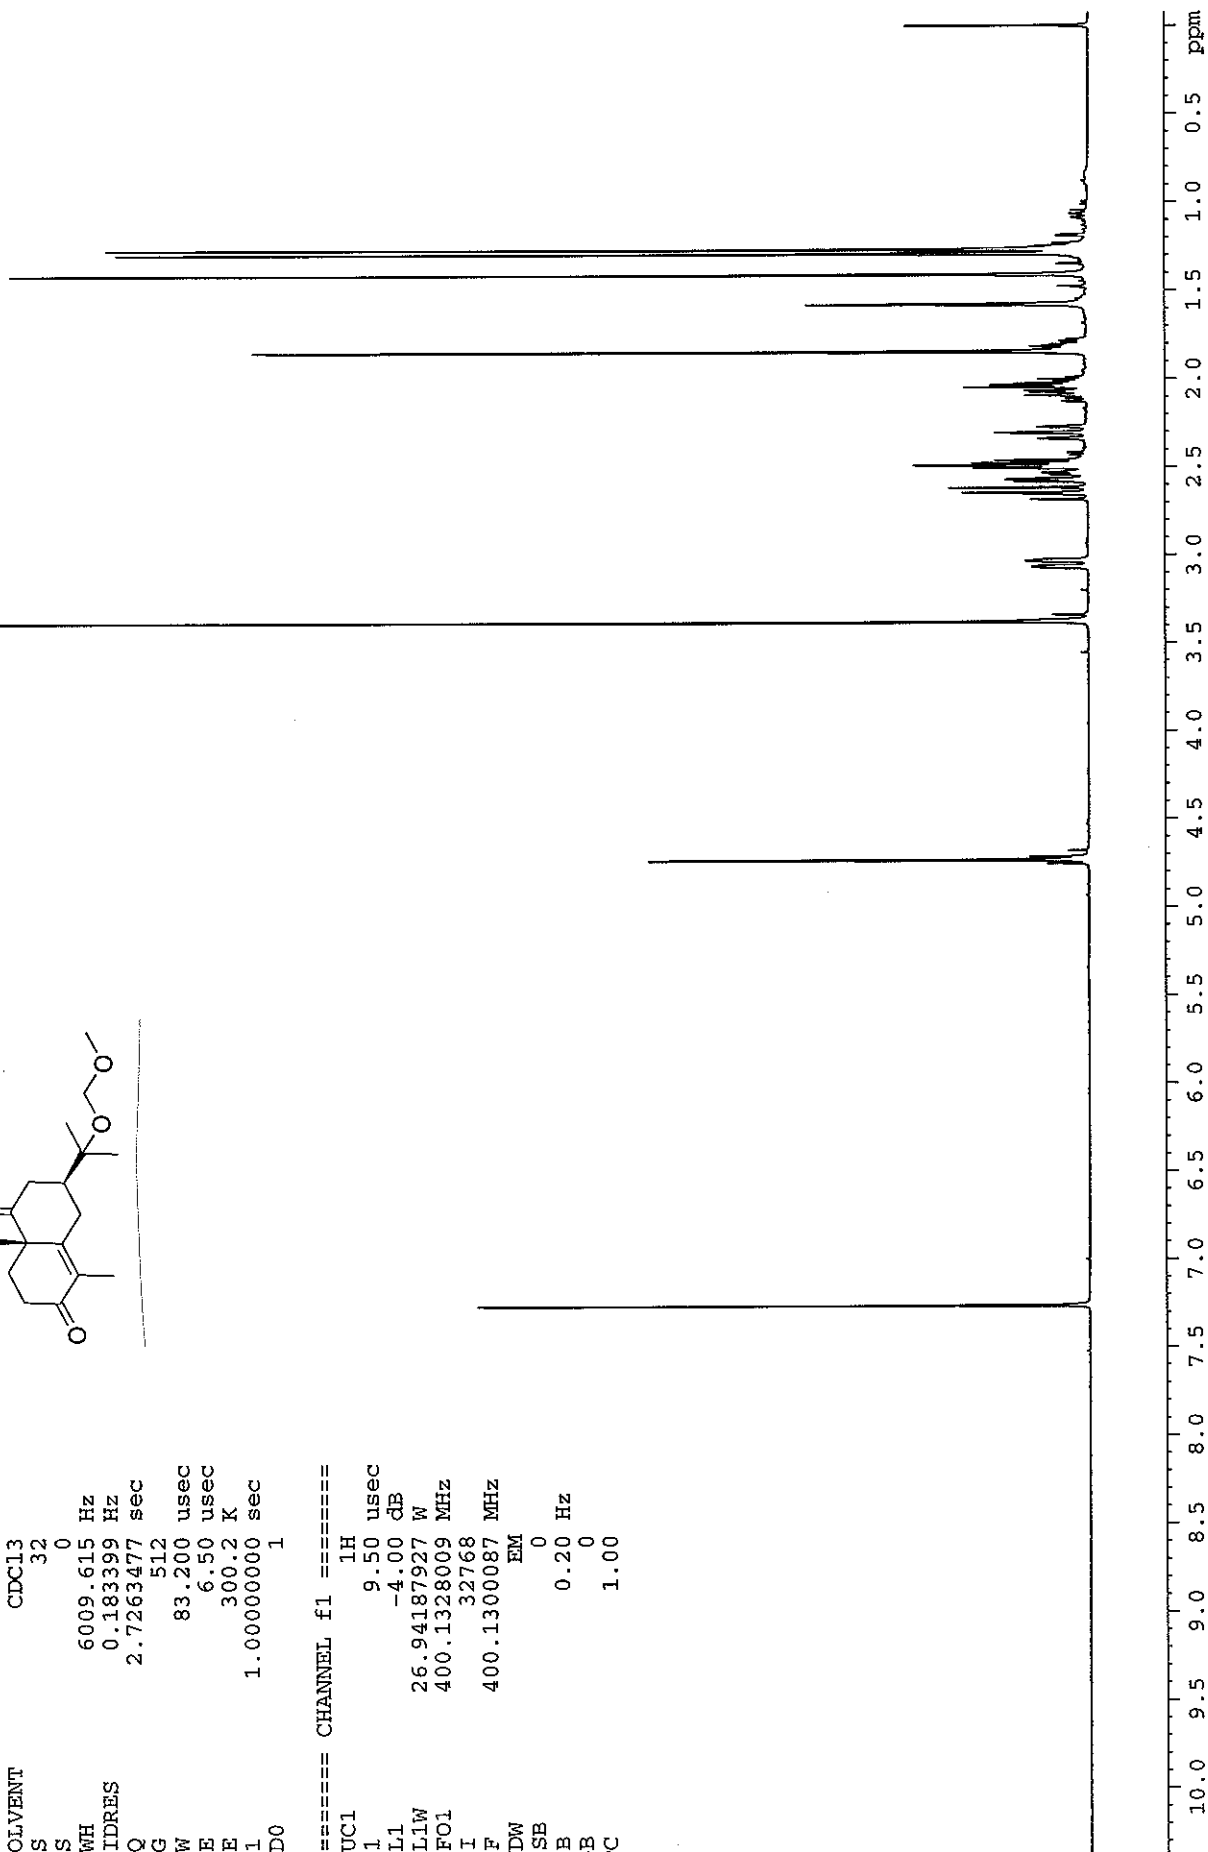

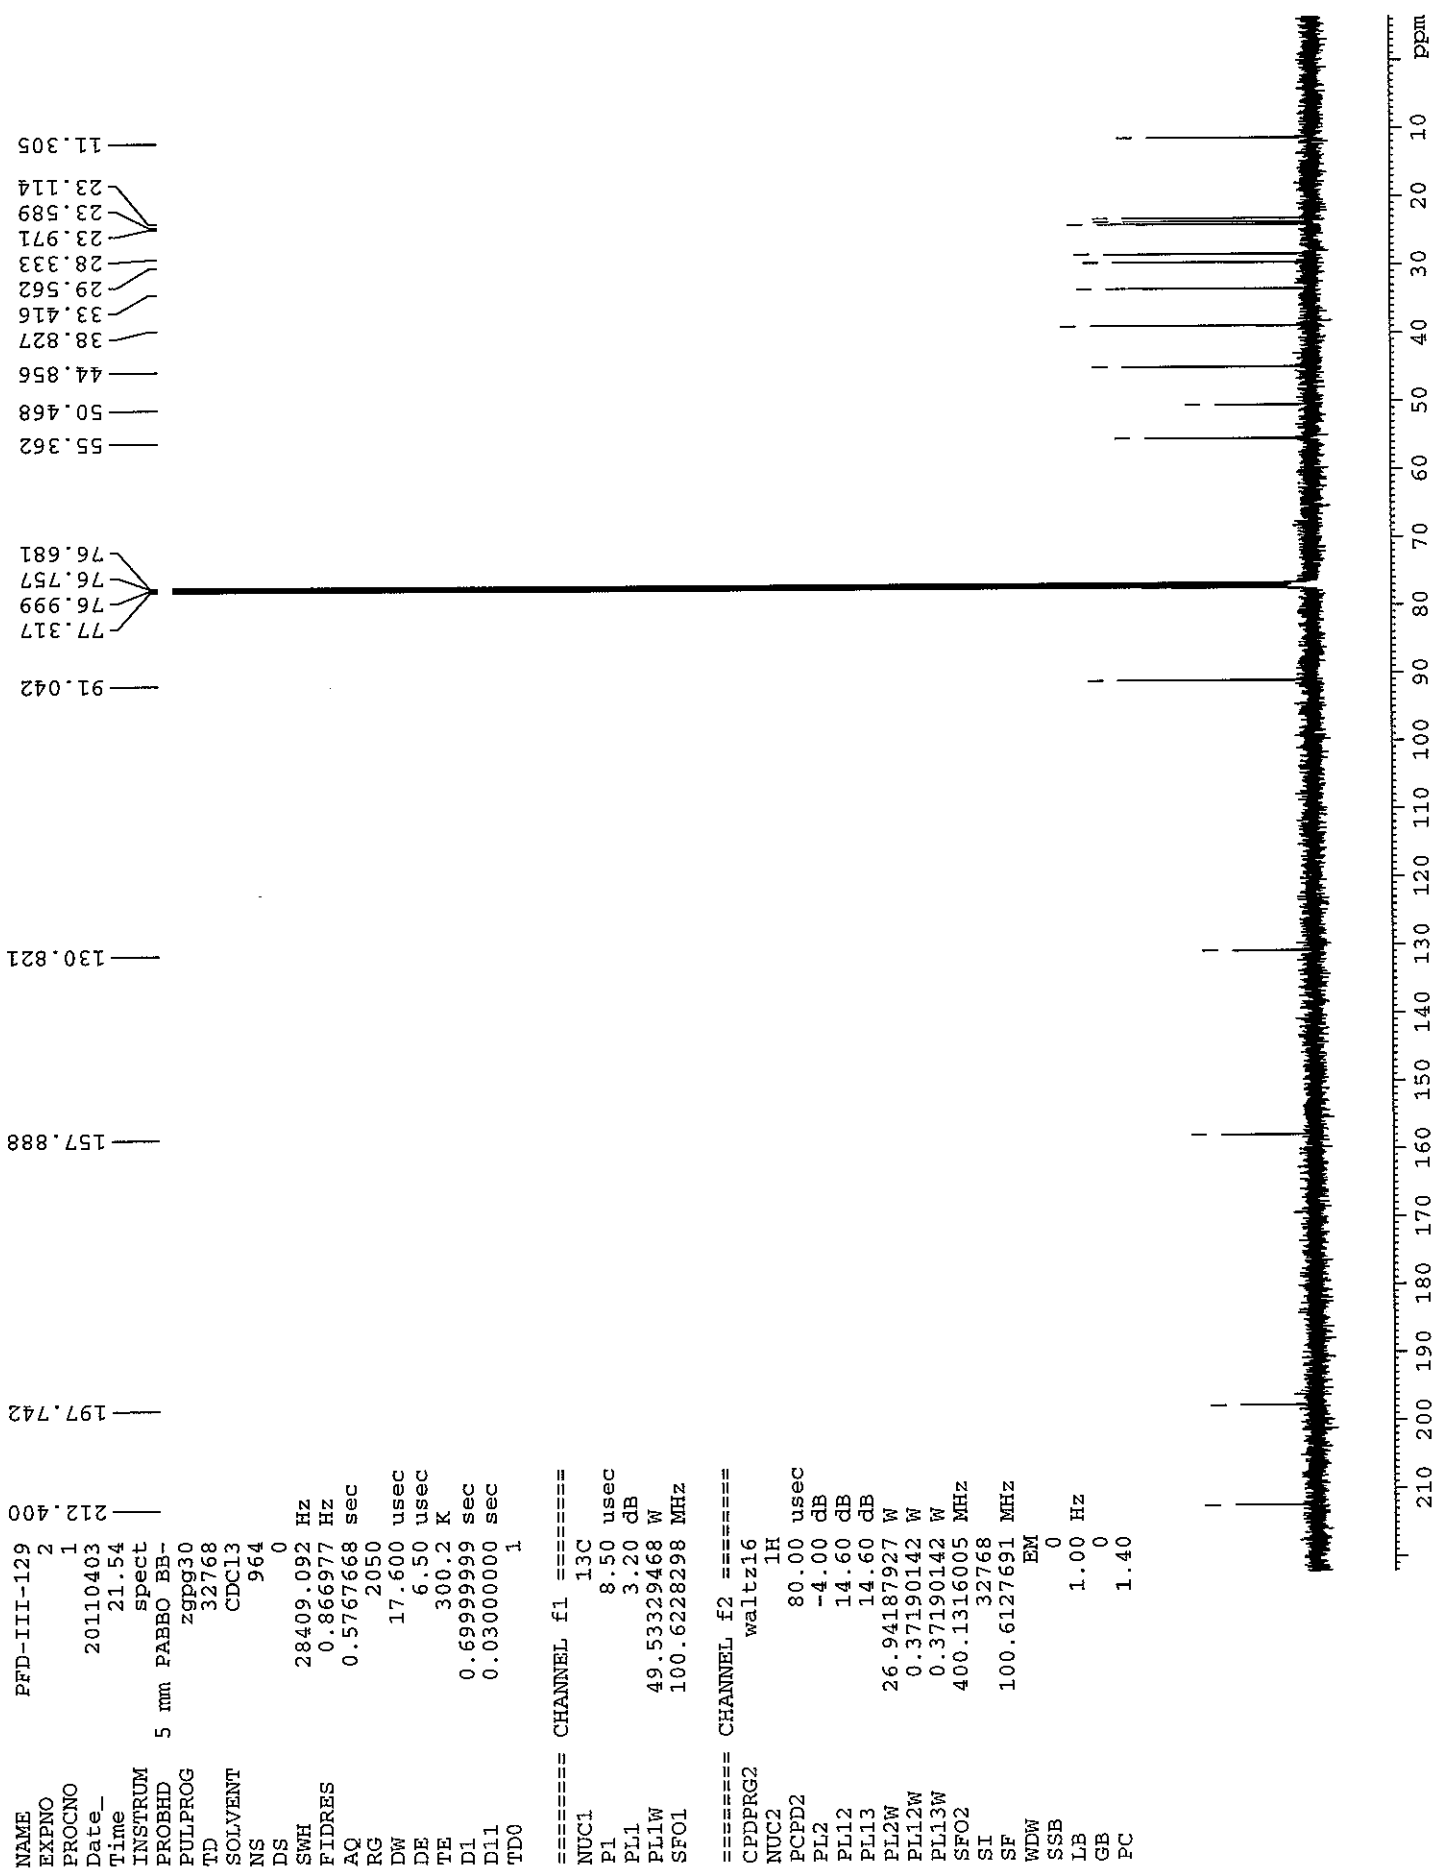

NAME PFD-III-130  
EXPNO 2  
PROCNO 1  
Date\_ 20110402  
Time 20.27  
INSTRUM spect  
PROBHD 5 mm PABBO BB-  
PULPROG zg30  
TD 32768  
SOLVENT CDCl3  
NS 5  
DS 0  
SWH 11160.714 Hz  
FIDRES 0.340598 Hz  
AQ 1.4680564 sec  
RG 512  
DE 44.800 usec  
TE 300.2 K  
D1 1.0000000 sec  
TD0 1

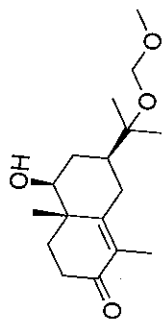

==== CHANNEL f1 =====  
NUC1 1H  
P1 9.50 usec  
PL1 -4.00 dB  
PL1W 26.94187927 W  
SFO1 400.1328009 MHz  
SI 32768  
SF 400.1300087 MHz  
WDW EM  
SSB 0  
LB 0.20 Hz  
GB 0  
PC 1.00

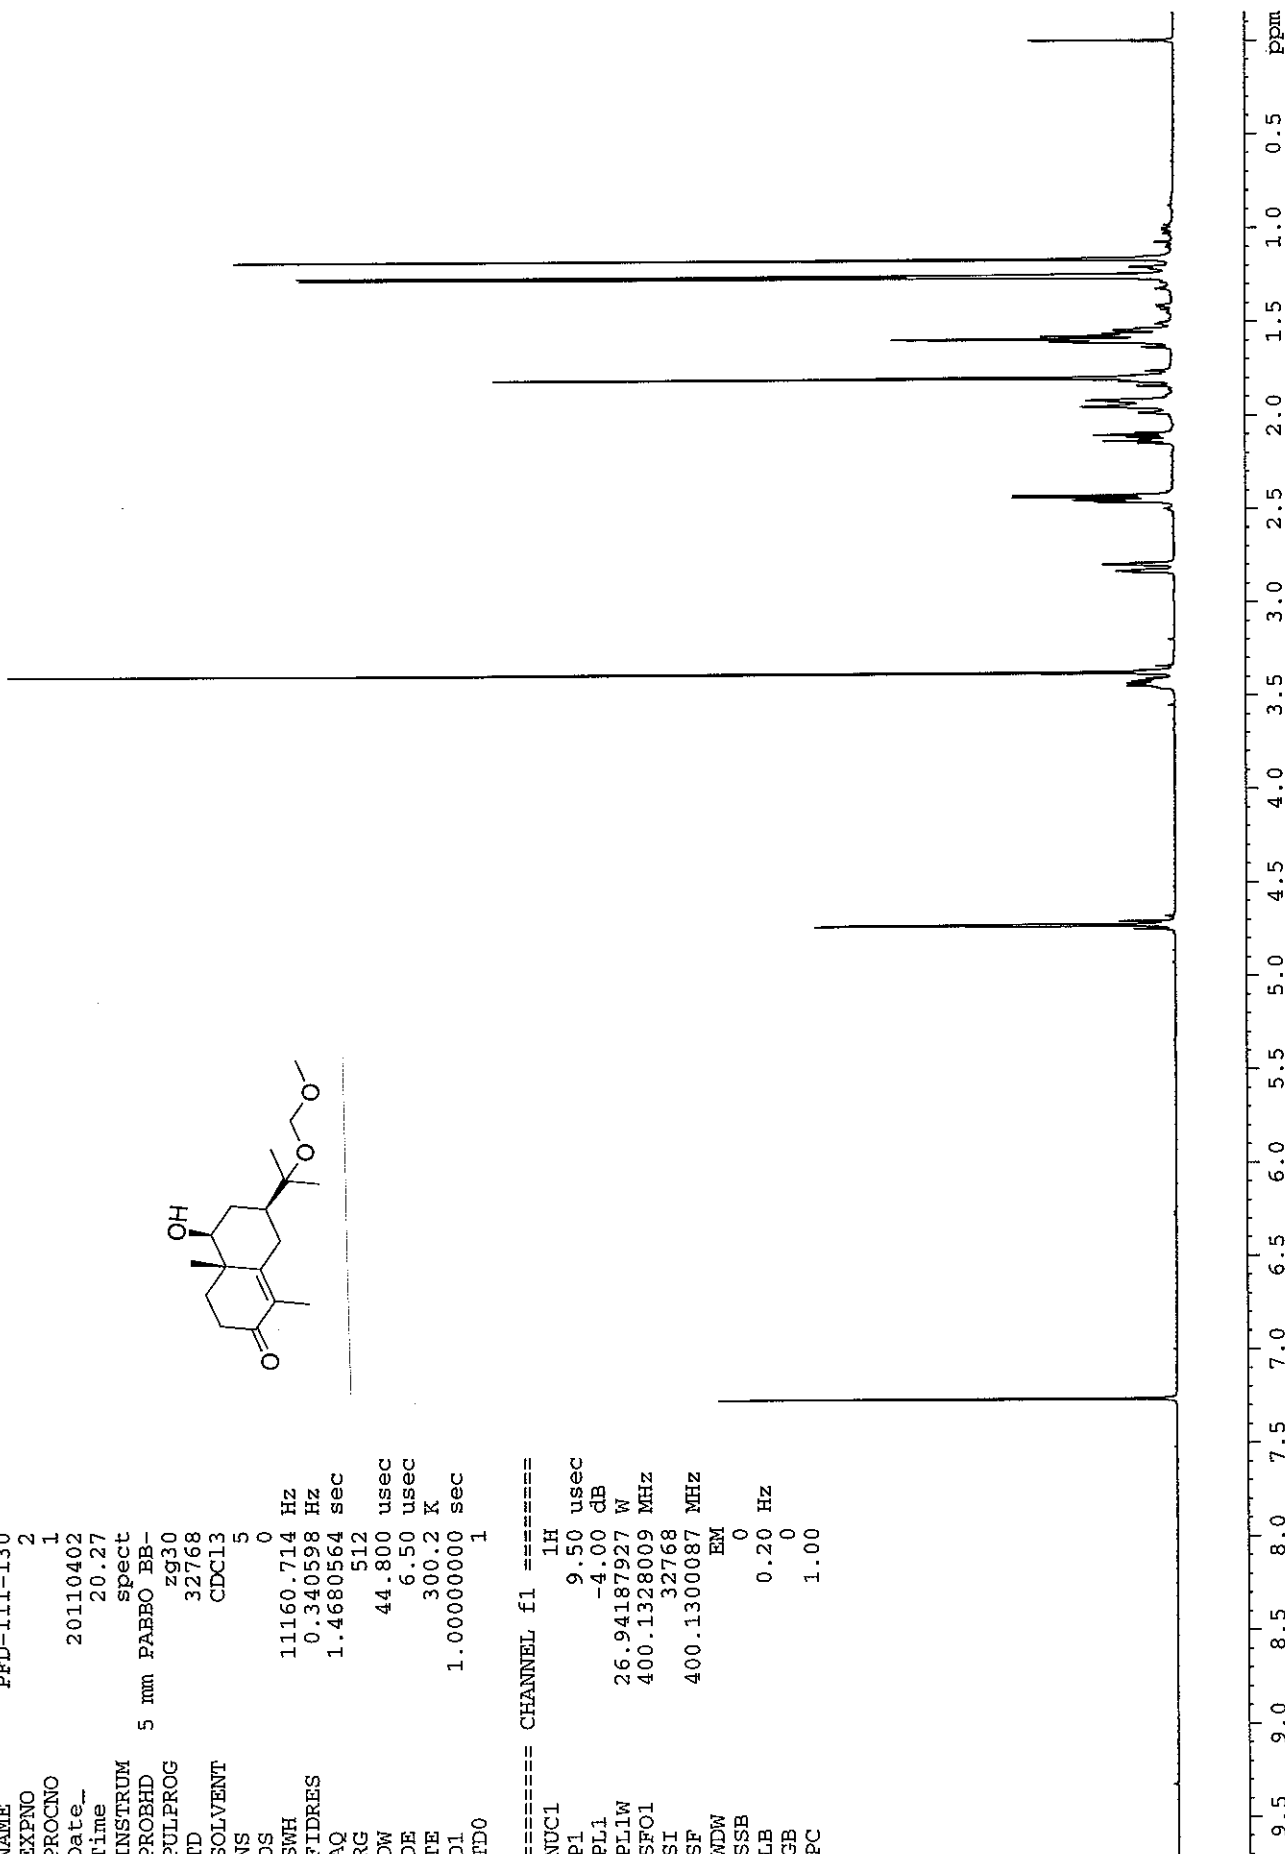

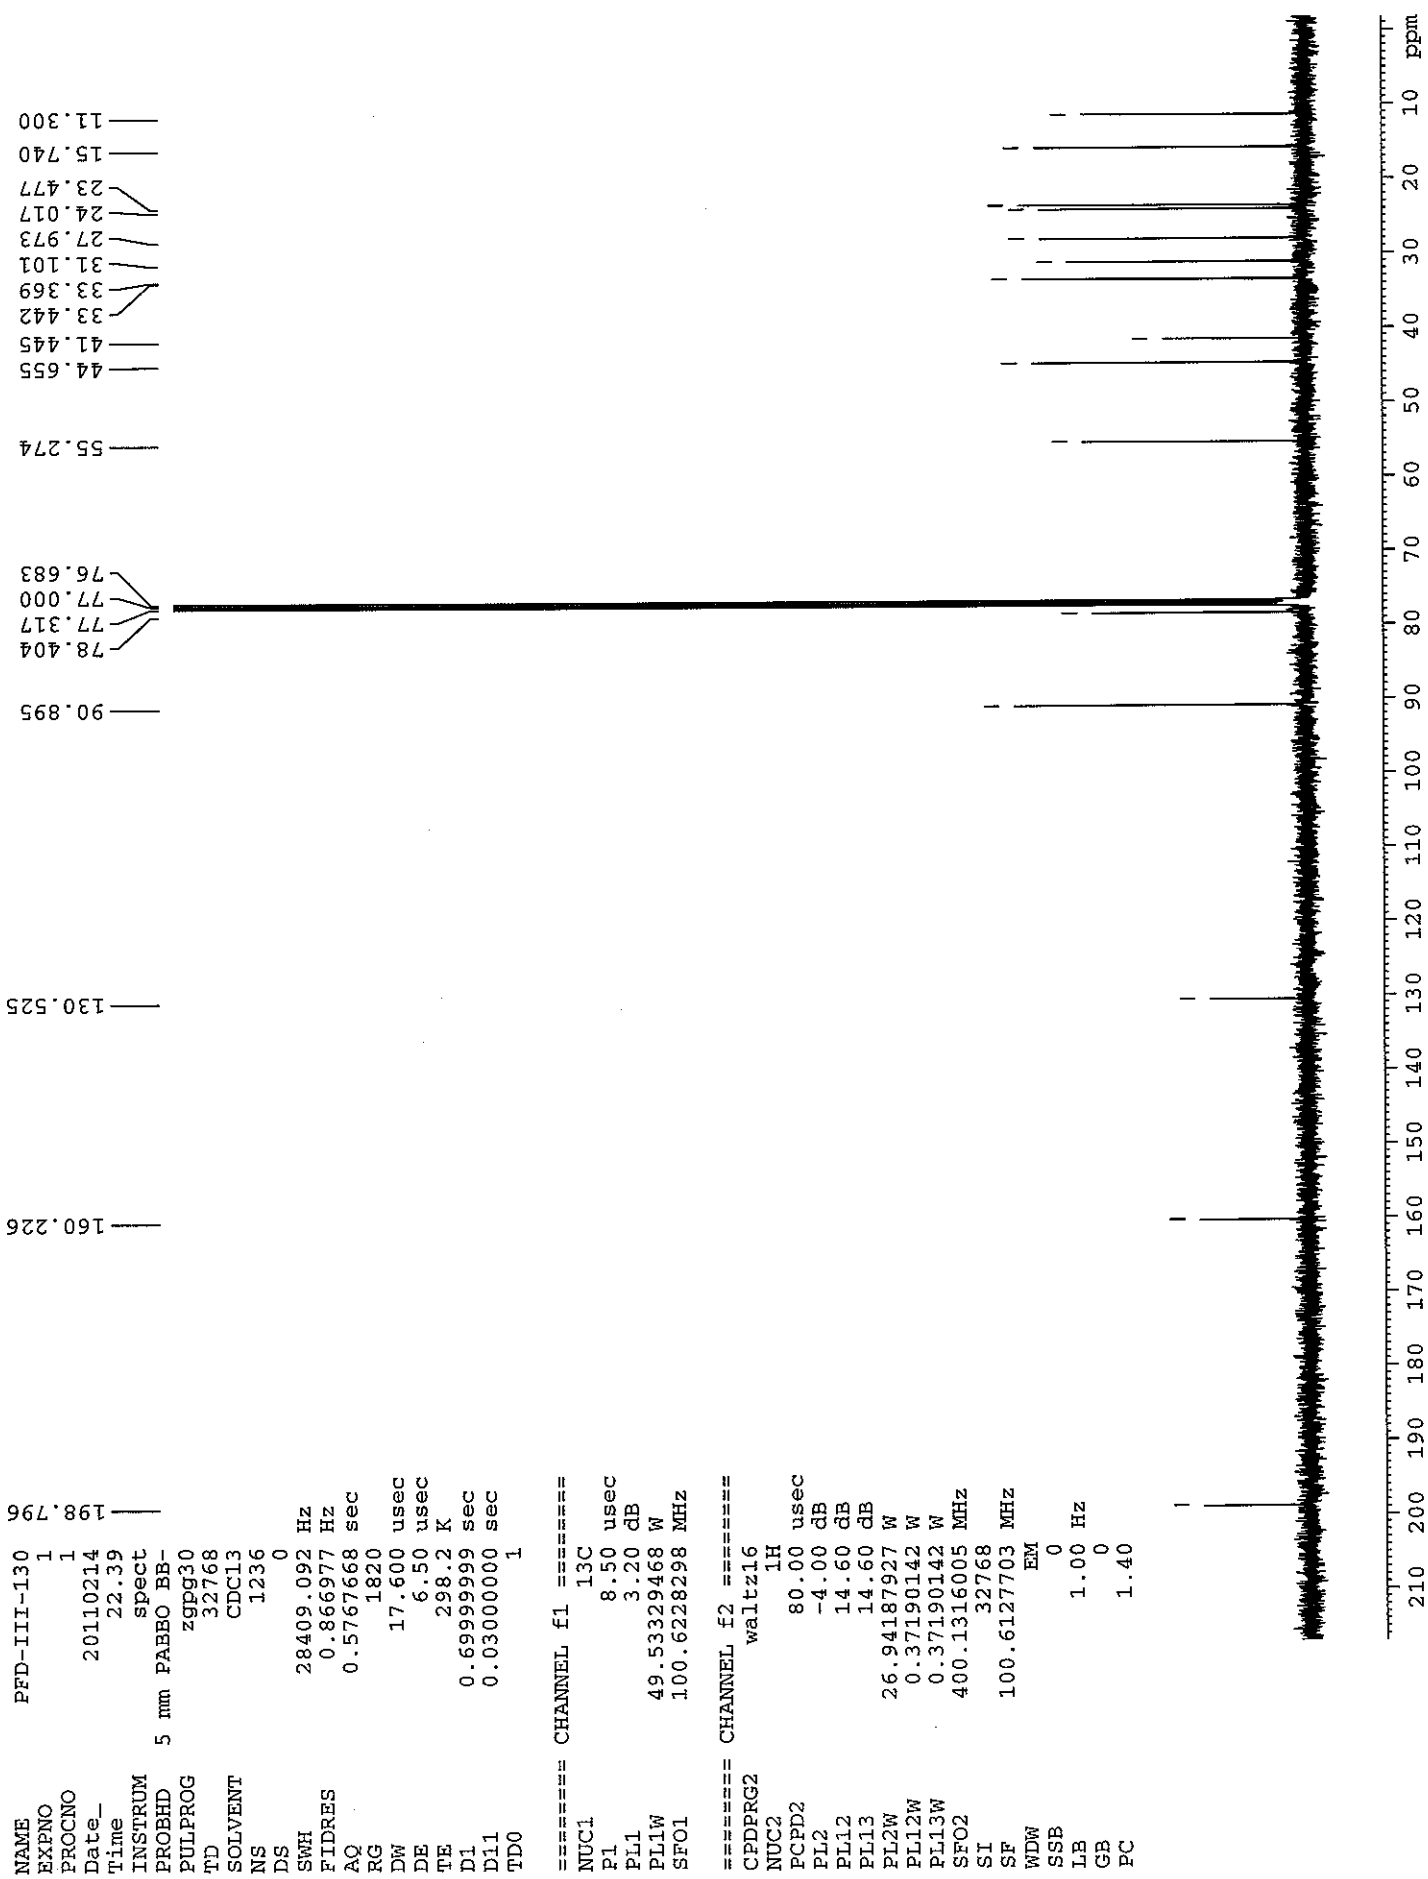

```

NAME          PFD-III-130
EXPNO         1
PROCNO        1
Date_         20110214
Time_        22.39
INSTRUM       spect
PROBHD        5 mm PABBO BB-
PULPROG       zgpg30
TD            32768
SOLVENT       CDCl3
NS            1236
DS            0
SWH           28409.092 Hz
FIDRES       0.866977 Hz
AQ           0.5767668 sec
RG           1820
DW           17.600 usec
DE           6.50 usec
TE           298.2 K
D1           0.69999999 sec
D11          0.03000000 sec
TD0          1
    
```

```

===== CHANNEL f1 =====
NUC1          13C
P1            8.50 usec
PL1          3.20 dB
PL1W         49.53329468 W
SFO1         100.6228298 MHz

===== CHANNEL f2 =====
CPDPRG2       waltz16
NUC2          1H
PCPD2         80.00 usec
PL2          -4.00 dB
PL12         14.60 dB
PL13         14.60 dB
PL2W         26.94187927 W
PL12W        0.37190142 W
PL13W        0.37190142 W
SFO2         400.1316005 MHz
SI           32768
SF           100.6127703 MHz
WDW           EM
SSB           0
LB           1.00 Hz
GB           0
PC           1.40
    
```

PFD-III-132-P/1  
proton

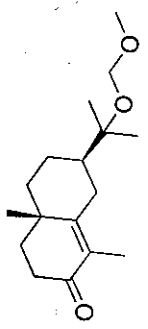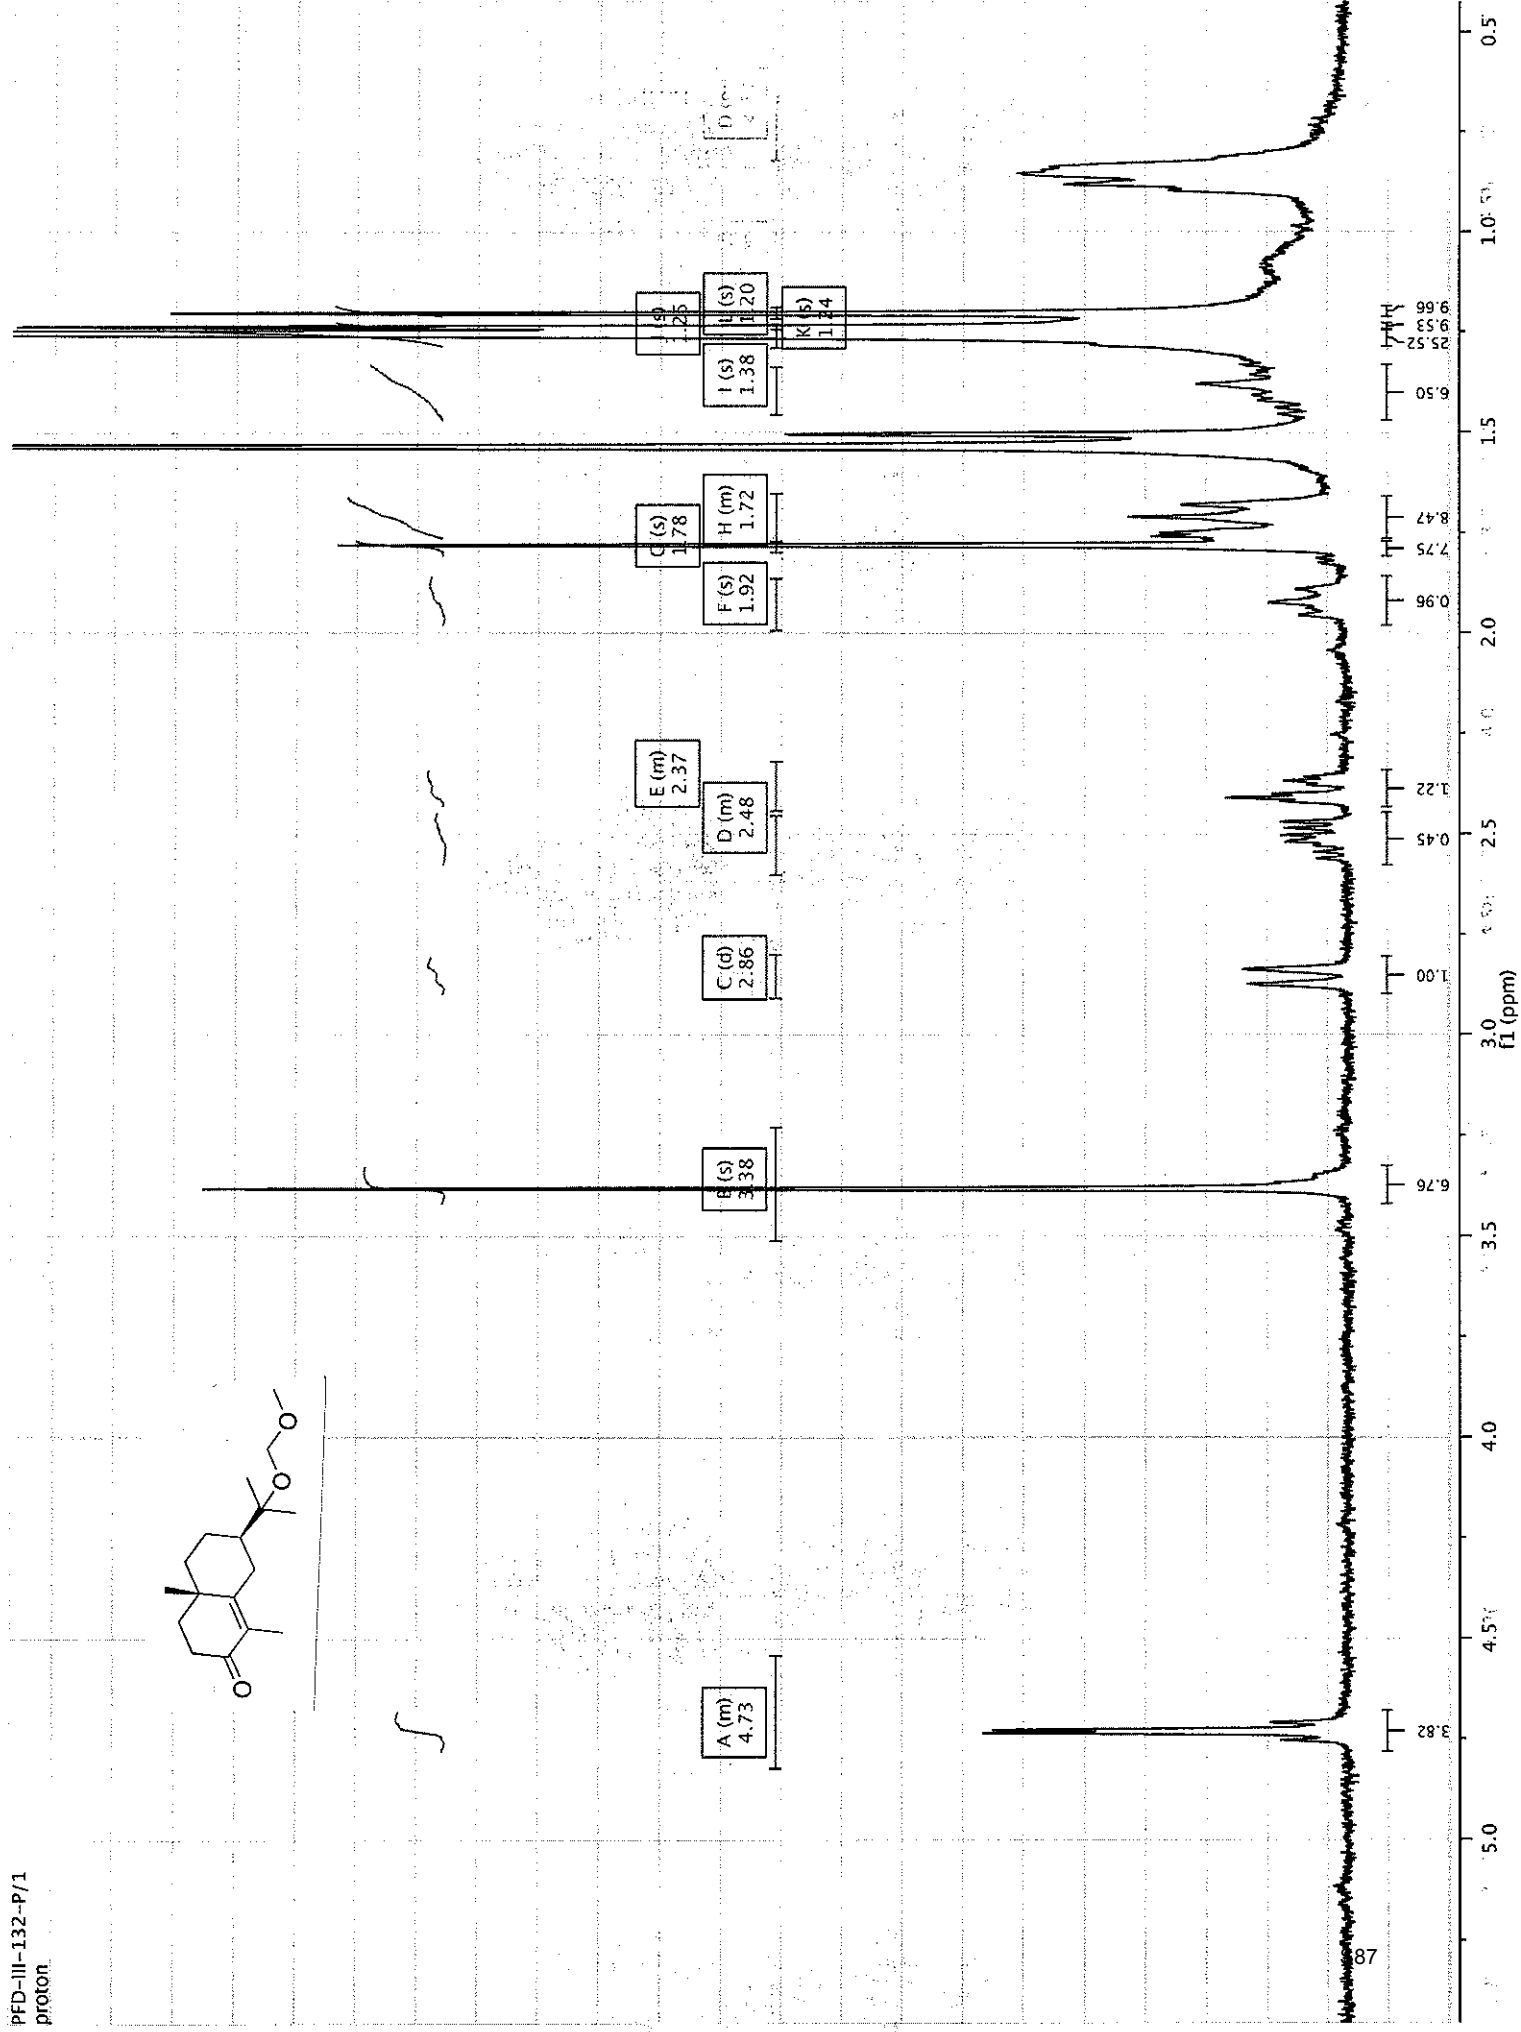

87

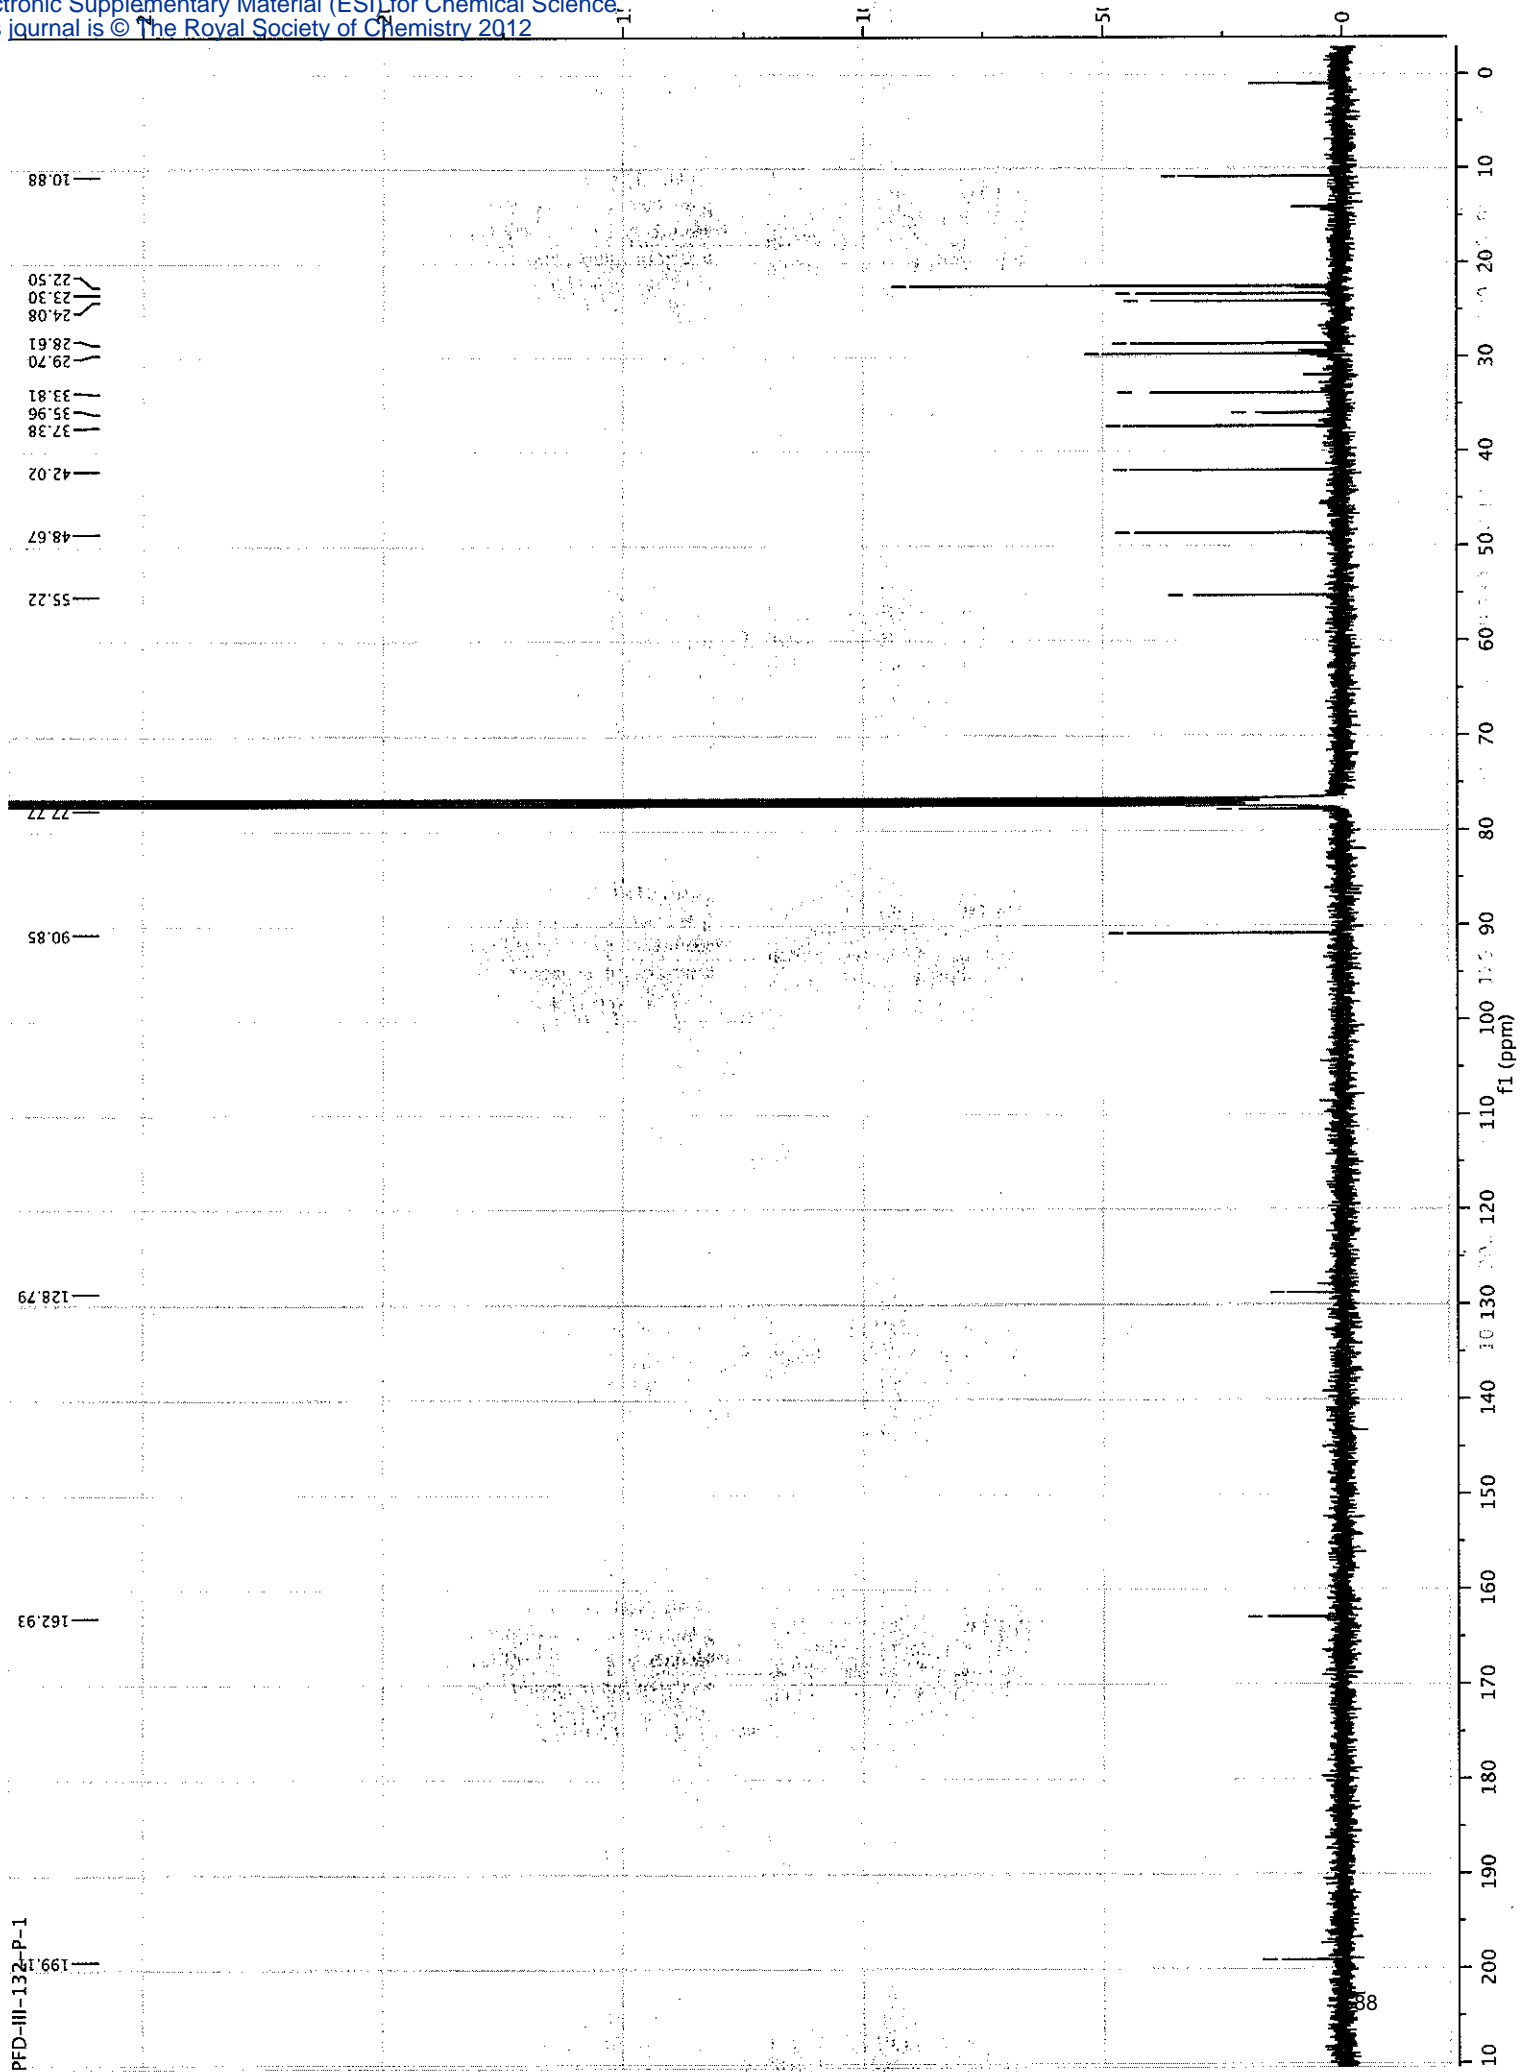



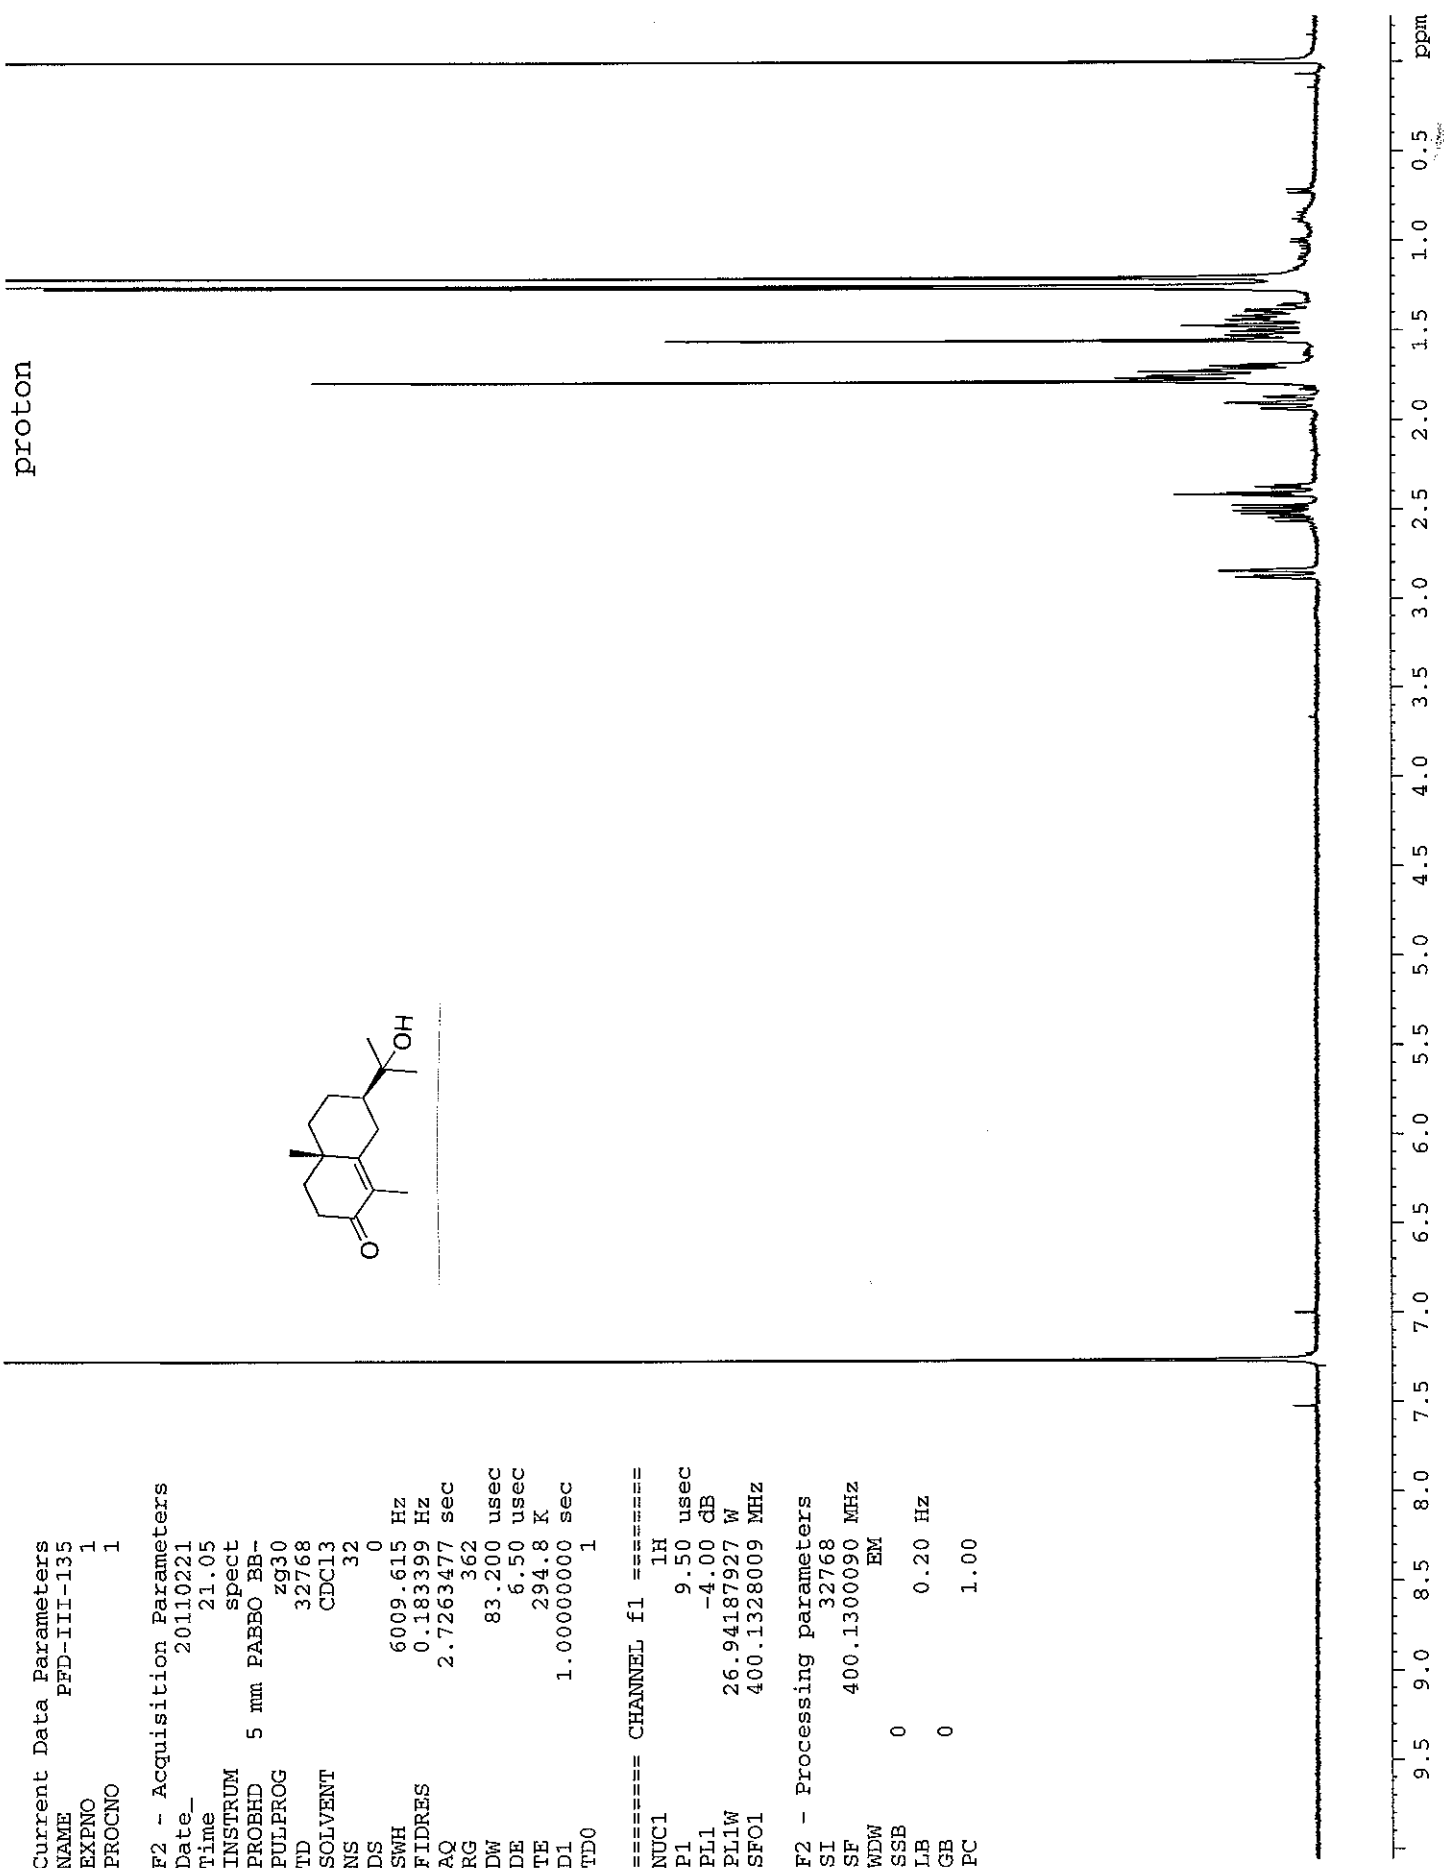

Current Data Parameters  
NAME PFD-III-135  
EXPNO 1  
PROCNO 1

F2 - Acquisition Parameters  
Date\_ 20110221  
Time 21.05  
INSTRUM spect  
PROBHD 5 mm PABBO BB-  
PULPROG zg30  
TD 32768  
SOLVENT CDC13  
NS 32  
DS 0  
SWH 6009.615 Hz  
FIDRES 0.183399 Hz  
AQ 2.7263477 sec  
RG 362  
DW 83.200 usec  
DE 6.50 usec  
TE 294.8 K  
D1 1.00000000 sec  
TD0 1

==== CHANNEL f1 =====  
NUC1 1H  
P1 9.50 usec  
PL1 -4.00 dB  
PL1W 26.94187927 W  
SF01 400.1328009 MHz

F2 - Processing parameters  
SI 32768  
SF 400.1300090 MHz  
WDW EM  
SSB 0  
LB 0.20 Hz  
GB 0  
PC 1.00

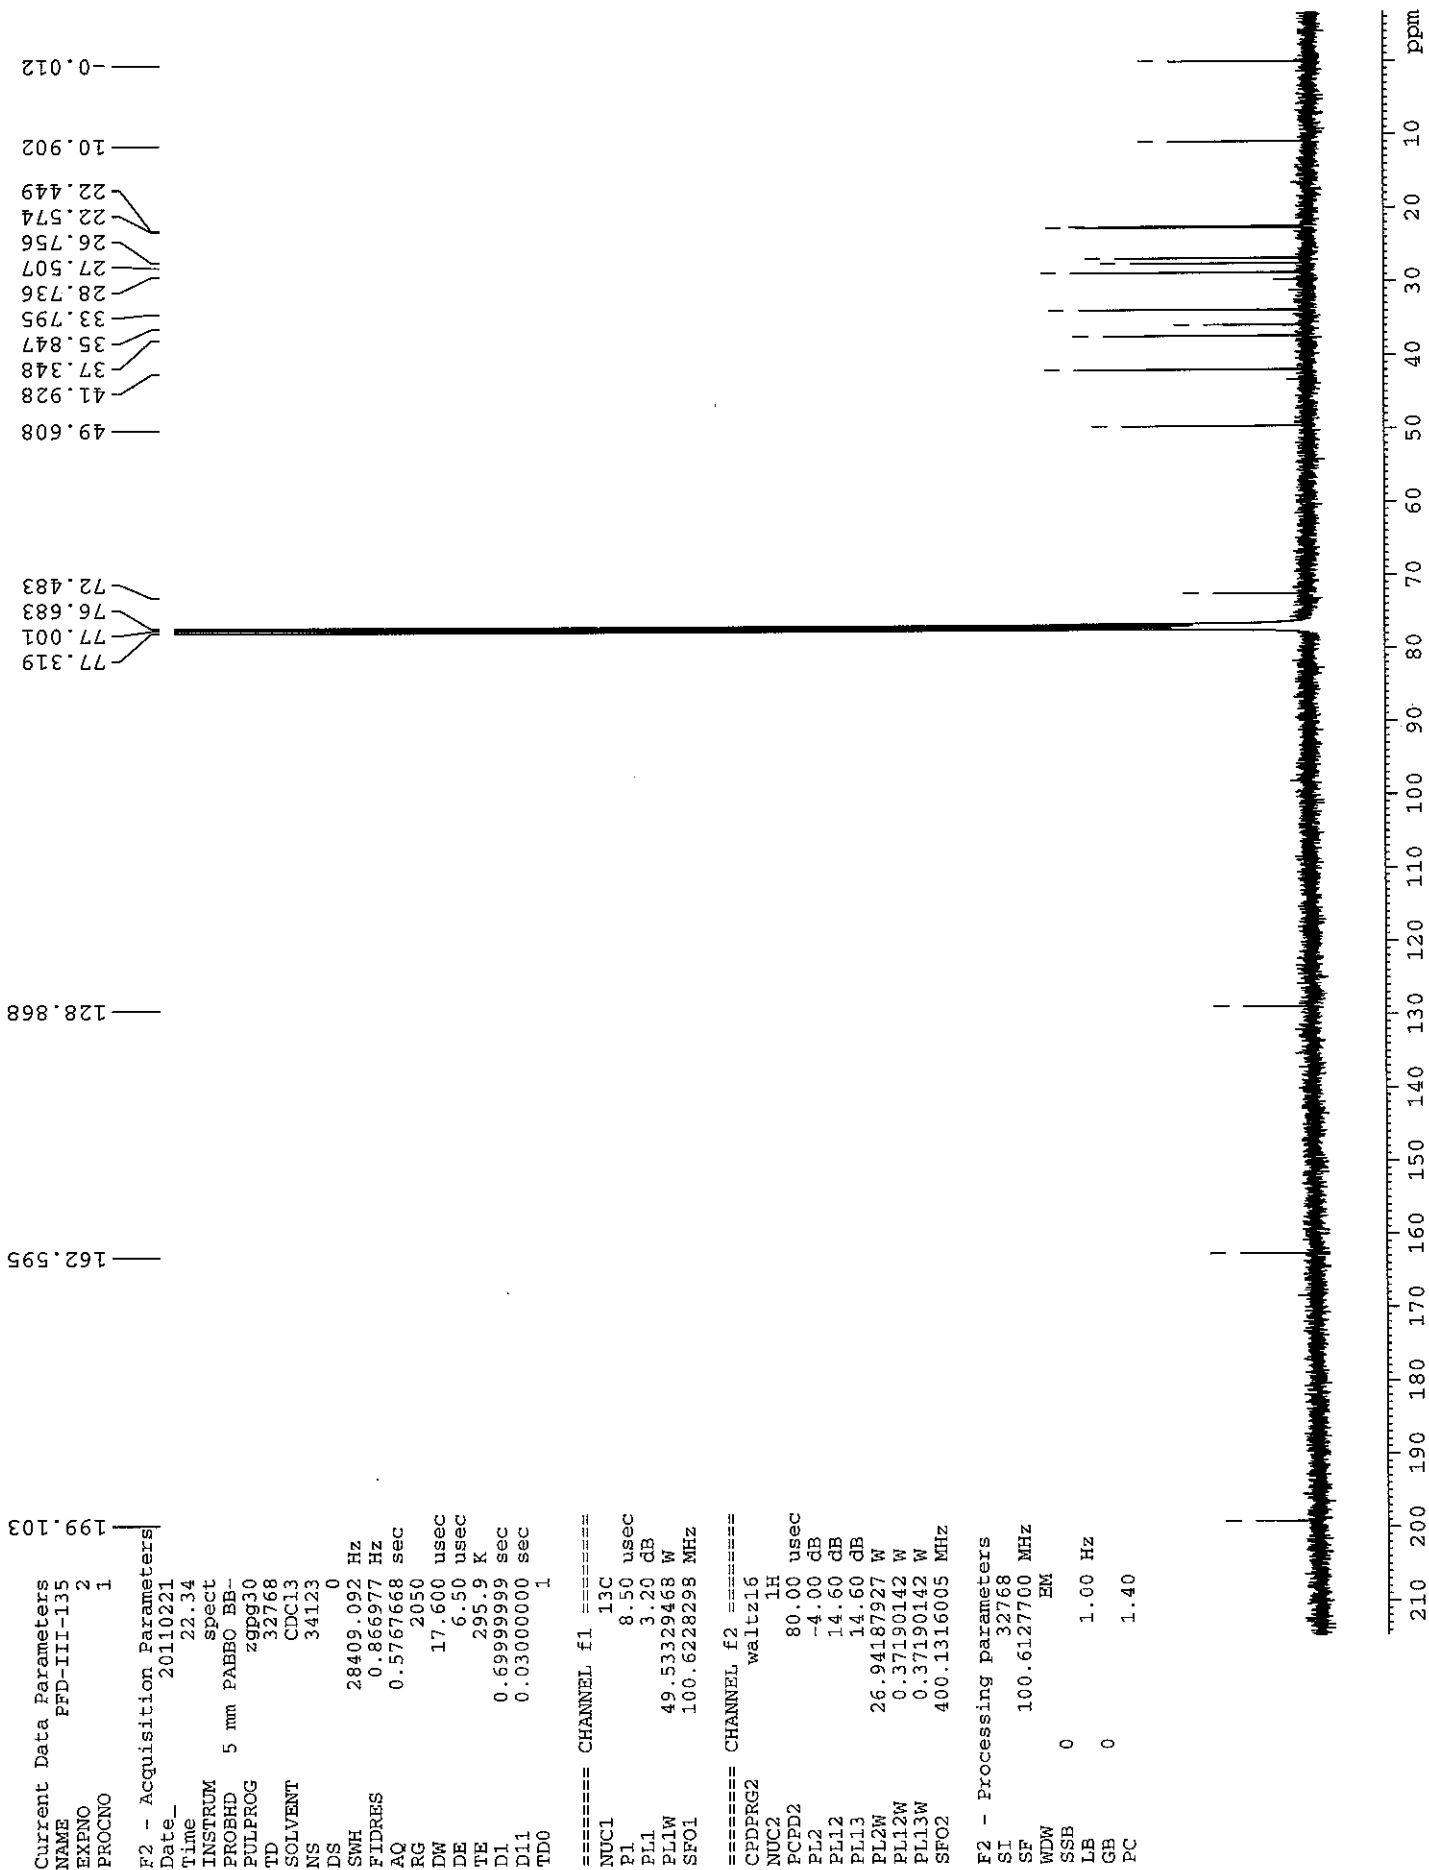

Current Data Parameters  
NAME PFD-III-173  
EXPNO 1  
PROCNO 1

F2 - Acquisition Parameters

Date\_ 20110905  
Time 17.06  
INSTRUM spect  
PROBHD 5 mm PABBO BB-  
PULPROG zg30  
TD 40498  
SOLVENT CDCl3  
NS 43  
DS 0  
SWH 7500.000 Hz  
FIDRES 0.185194 Hz  
AQ 2.6999166 sec  
RG 28.5  
DW 66.667 usec  
DE 6.50 usec  
TE 300.0 K  
D1 1.0000000 sec

==== CHANNEL f1 =====

NUC1 1H  
P1 15.00 usec  
PLW1 16.9820035 W  
SFO1 500.1332508 MHZ

F2 - Processing parameters

SI 65536  
SF 500.1300131 MHZ  
WDW EM  
SSB 0  
LB 0.30 Hz  
GB 0  
PC 4.00

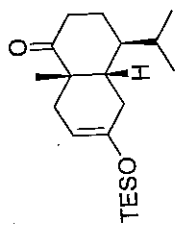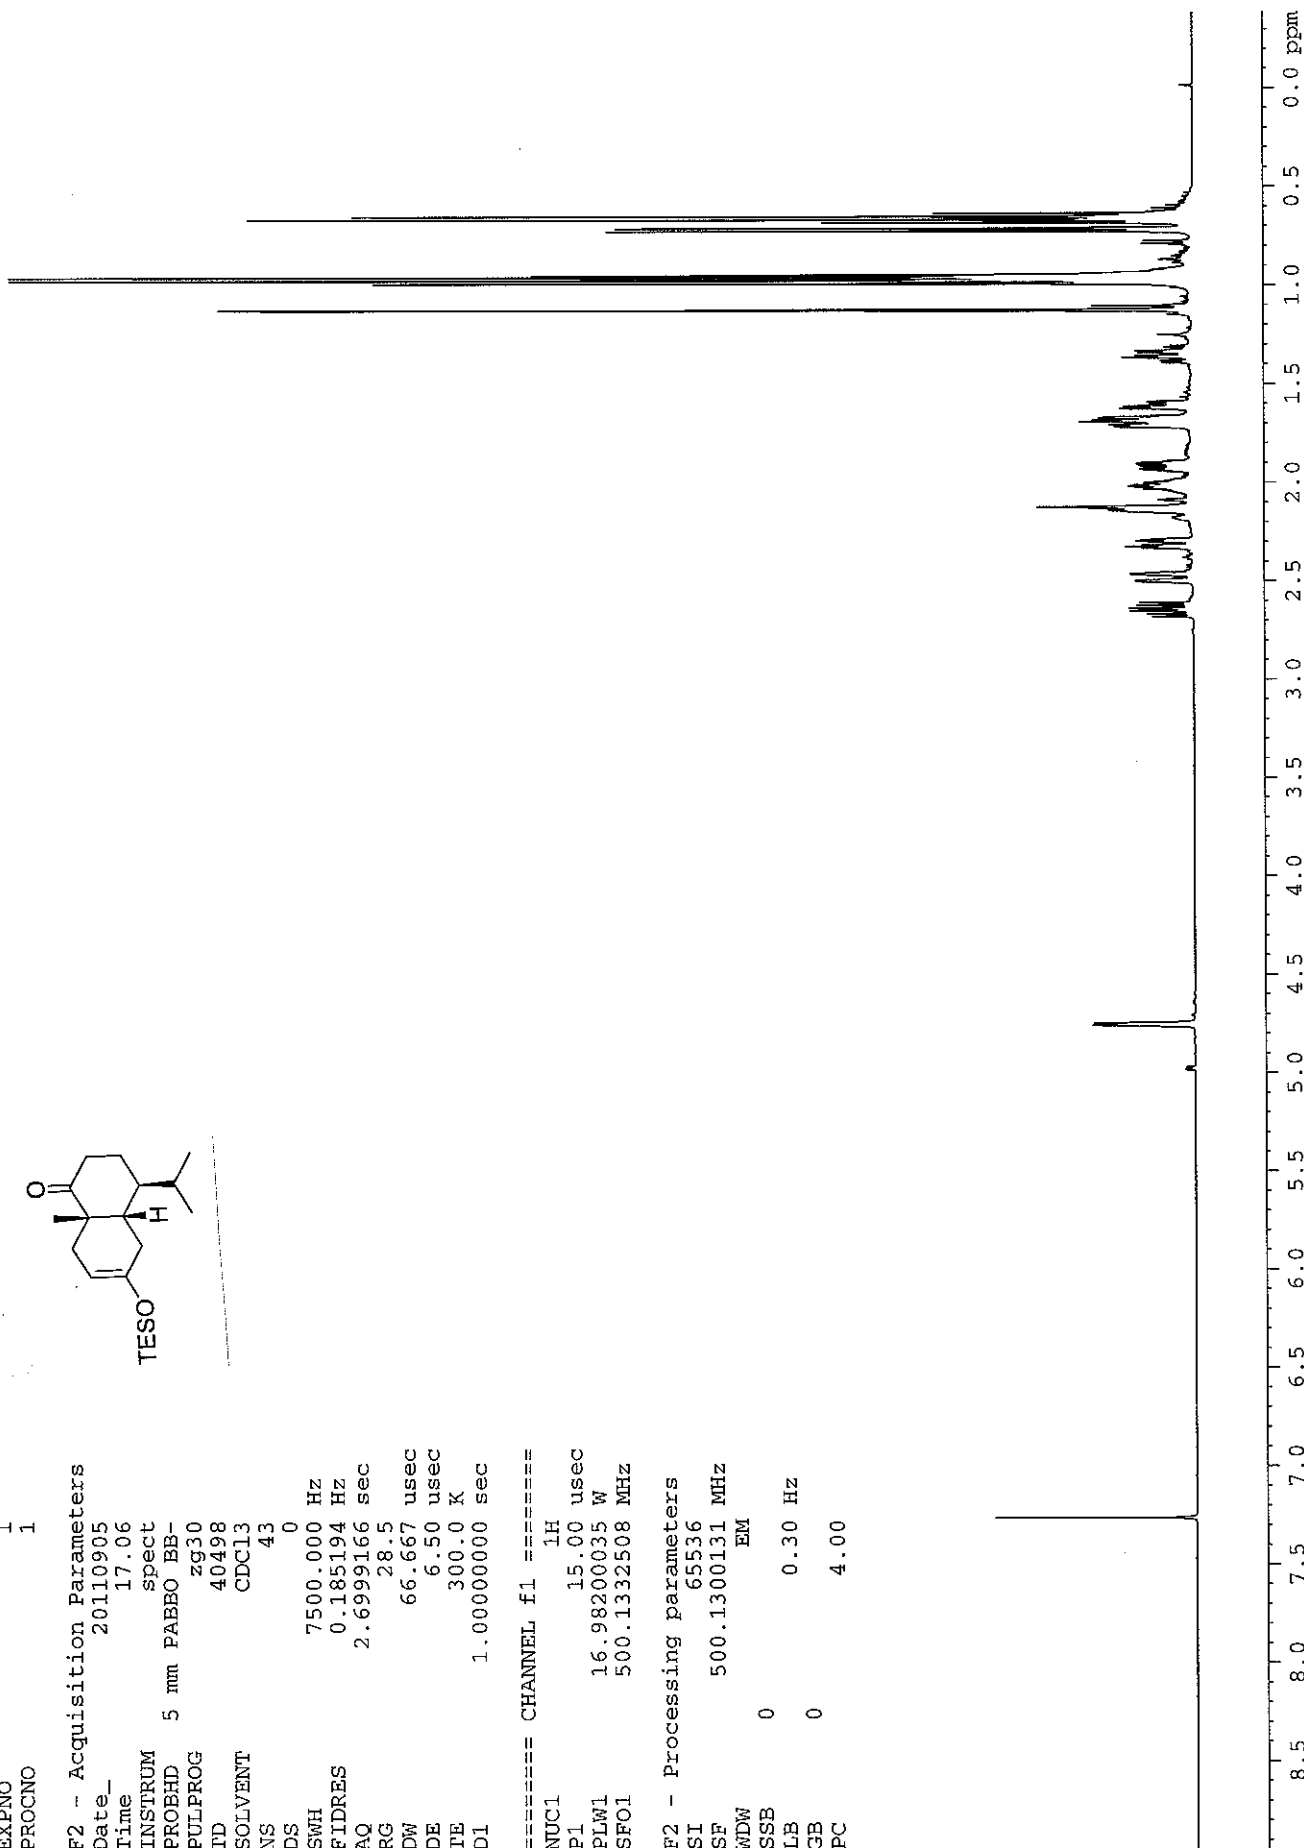

Current Data Parameters  
 NAME PFD-III-173  
 EXPNO 2  
 PROCNO 1  
 215.621

F2 - Acquisition Parameters

Date\_ 20110905  
 Time 17.11  
 INSTRUM spect  
 PROBHD 5 mm PABBO BB-  
 PULPROG zgpg30  
 TD 41662  
 SOLVENT CDCl3  
 NS 117  
 DS 0  
 SWH 29761.904 Hz  
 FIDRES 0.714366 Hz  
 AQ 0.6999716 sec  
 RG 912  
 DW 16.800 usec  
 DE 6.50 usec  
 TE 300.2 K  
 D1 1.0000000 sec  
 D11 0.0300000 sec

==== CHANNEL f1 =====  
 NUC1 13C  
 P1 9.13 usec  
 PLW1 123.02999878 W  
 SFO1 125.7703637 MHz

==== CHANNEL f2 =====  
 CPDPRG2 waltz16  
 NUC2 1H  
 PCPD2 80.00 usec  
 PLW2 19.15500069 W  
 PLW12 0.43459001 W  
 PLW13 0.27814001 W  
 SFO2 500.1320005 MHz

F2 - Processing parameters

147.672  
 99.676  
 77.255  
 77.000  
 76.746  
 46.923  
 44.108  
 39.078  
 37.215  
 31.497  
 27.555  
 27.409  
 24.166  
 21.495  
 20.162  
 14.509  
 6.651  
 5.007

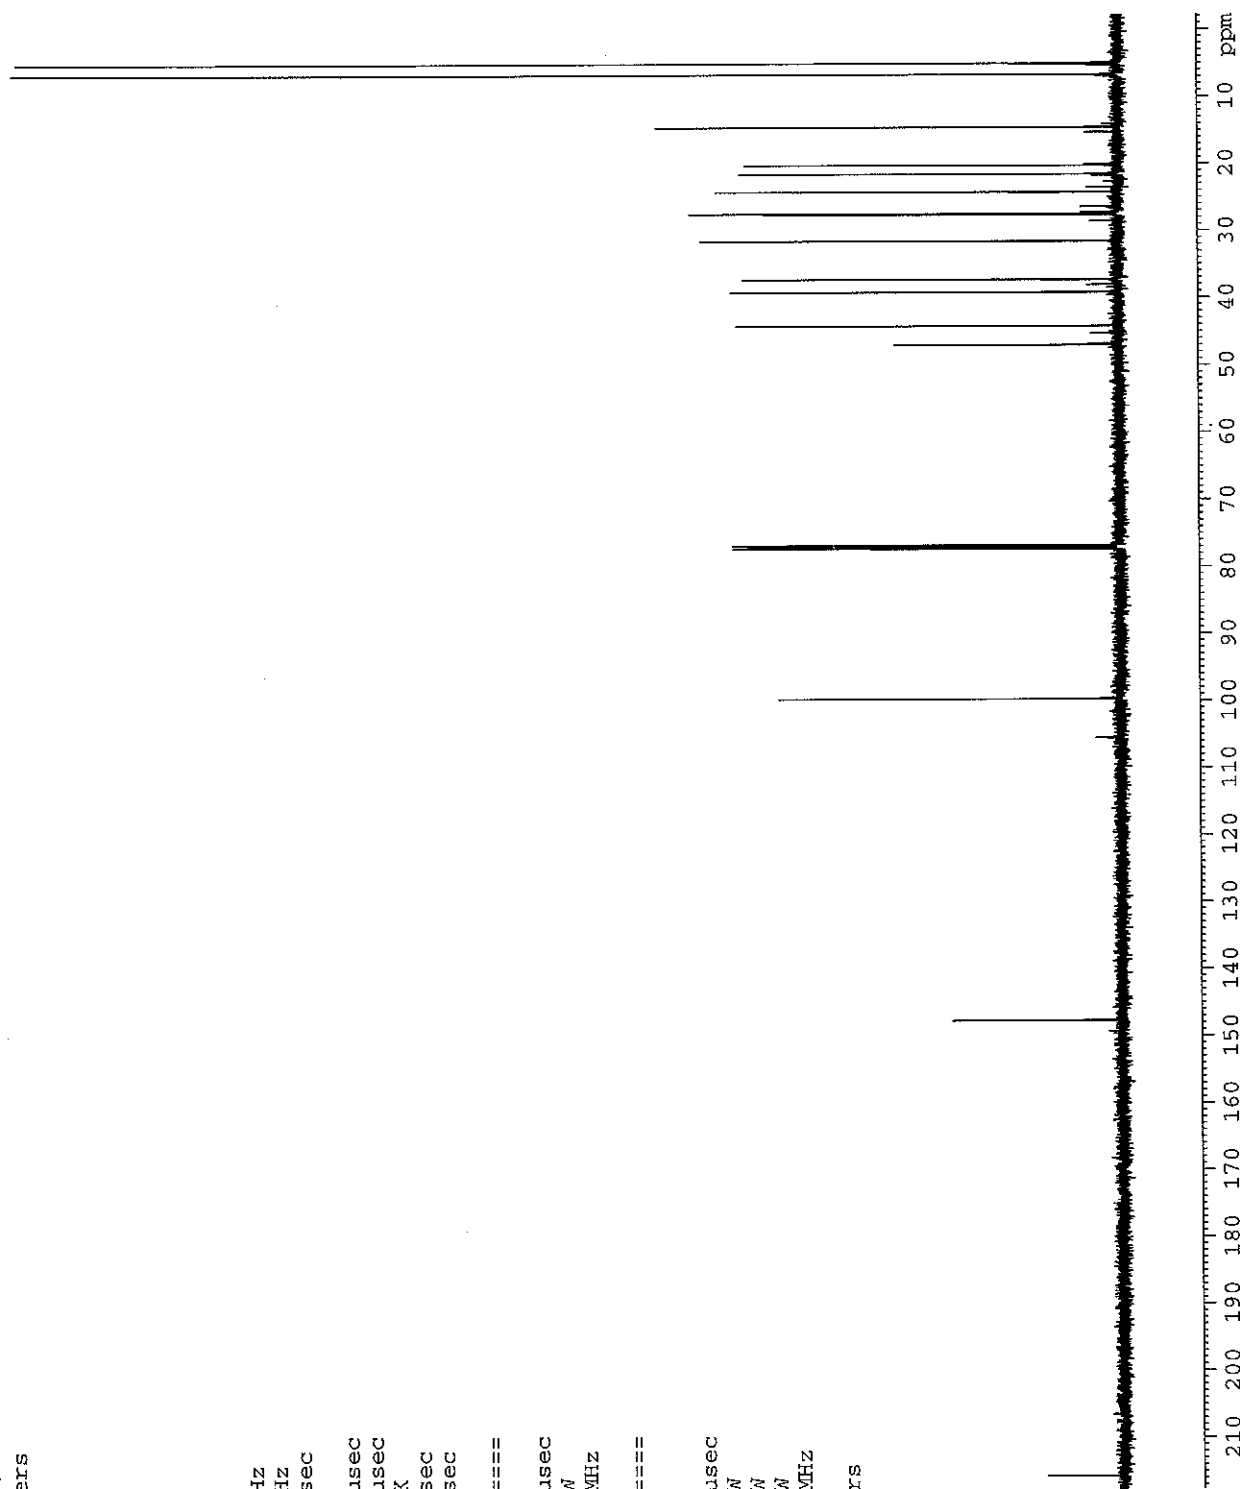

NAME PFD-III-173  
EXPNO 1  
PROCNO 1  
Date\_ 20110910  
Time 23.01  
INSTRUM spect  
PROBHD 5 mm PABBO BB-  
PULPROG zg30  
TD 32768  
SOLVENT CDCl3  
NS 32  
DS 0  
SWH 6009.615 Hz  
FIDRES 0.183399 Hz  
AQ 2.7263477 sec  
RG 575  
DW 83.200 usec  
DE 6.50 usec  
TE 298.2 K  
D1 1.0000000 sec  
TD0 1

==== CHANNEL f1 =====  
NUC1 1H  
P1 9.50 usec  
PL1 -4.00 dB  
PL1W 26.94187927 W  
SF01 400.1328009 MHz  
SI 32768  
SF 400.1300092 MHz  
WDW EM  
SSB 0  
LB 0.20 Hz  
GB 0  
PC 1.40

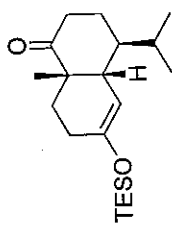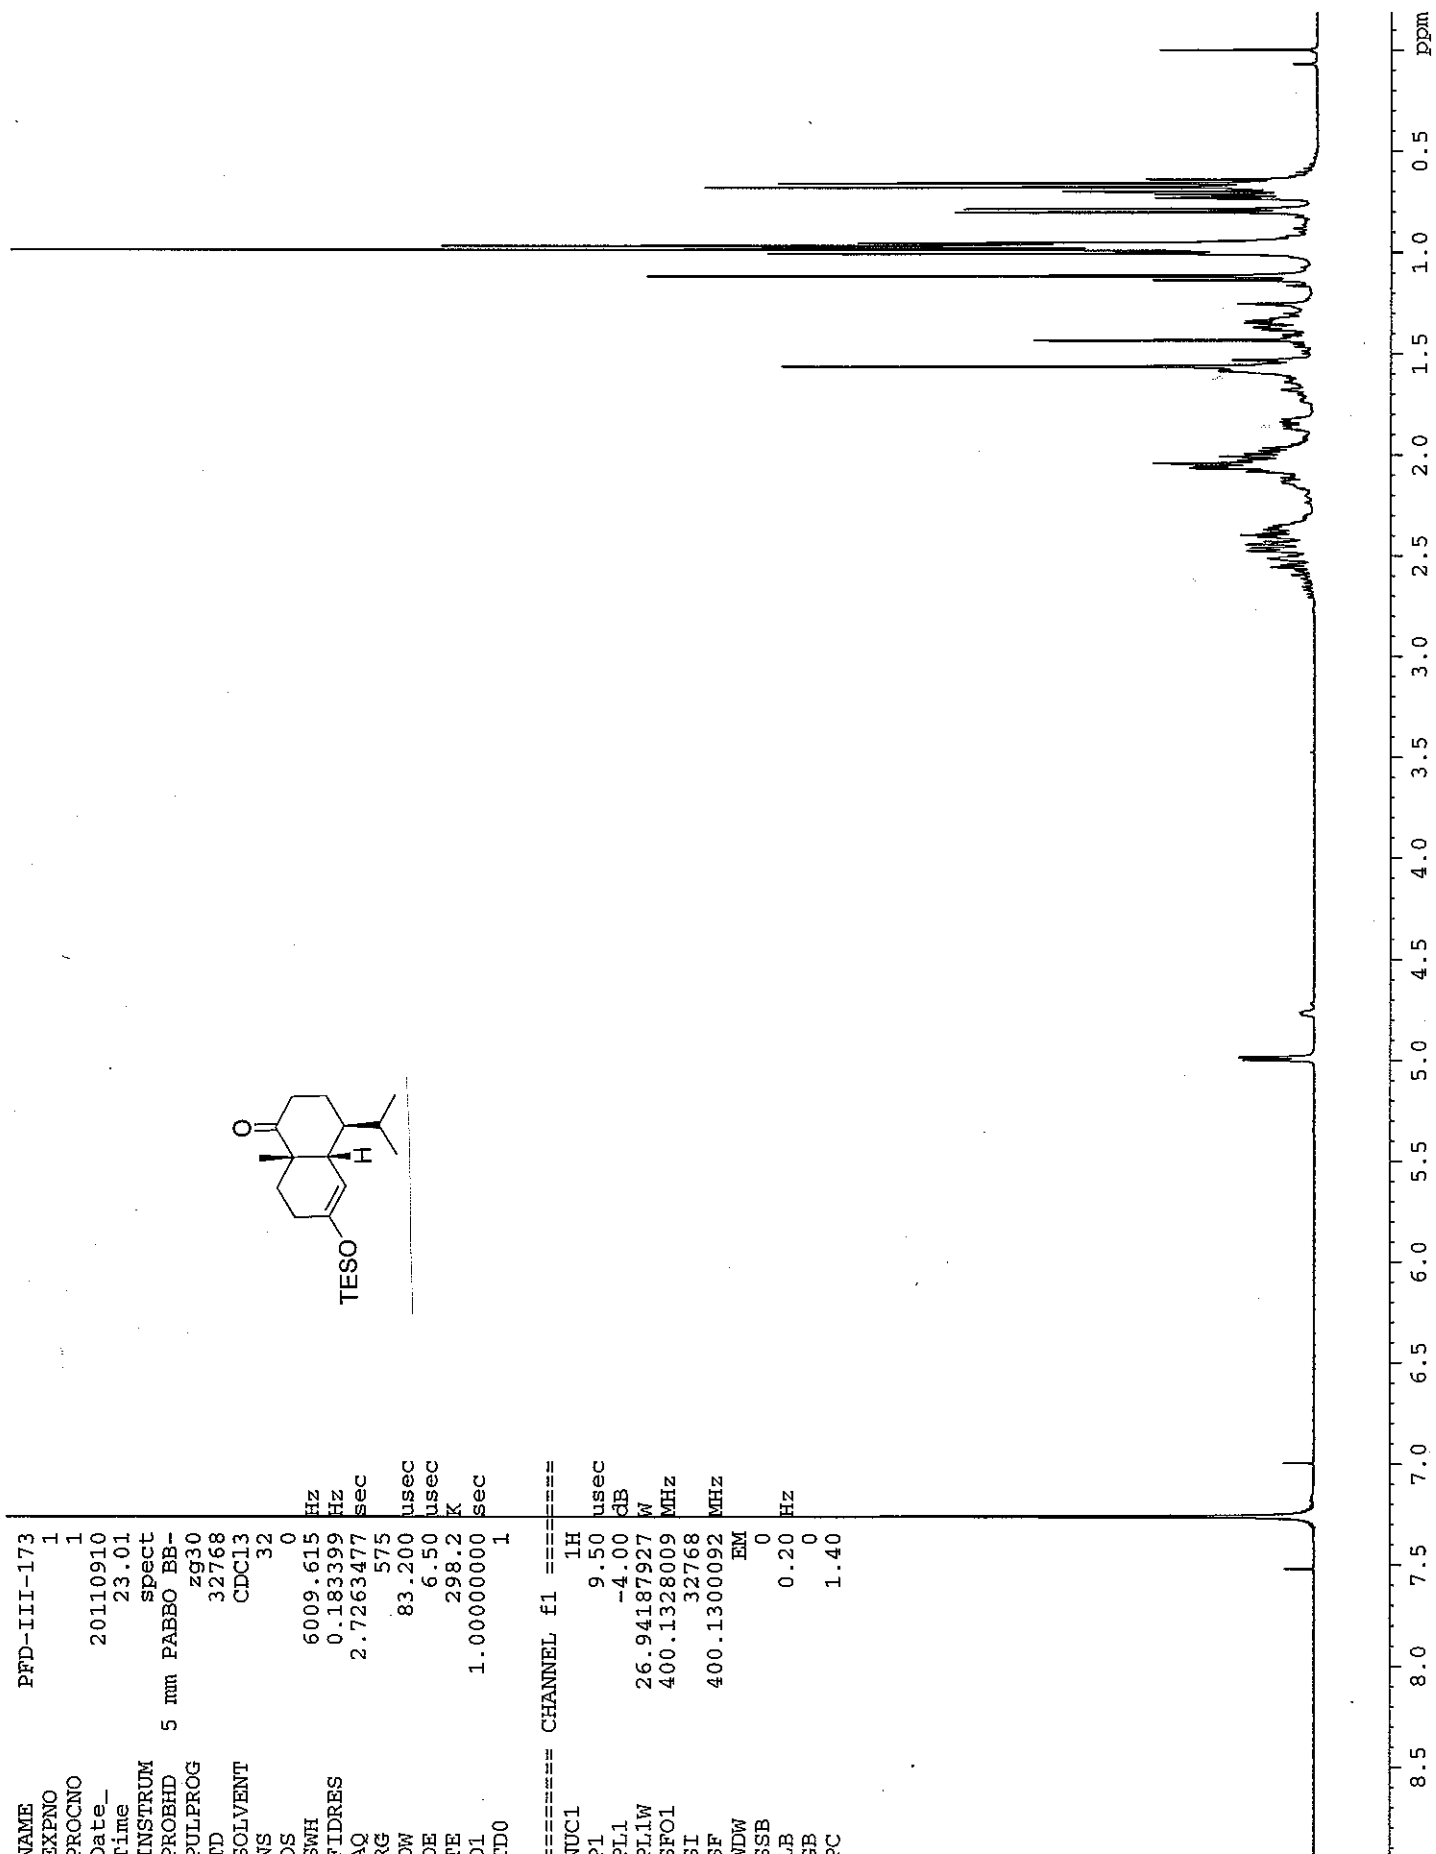

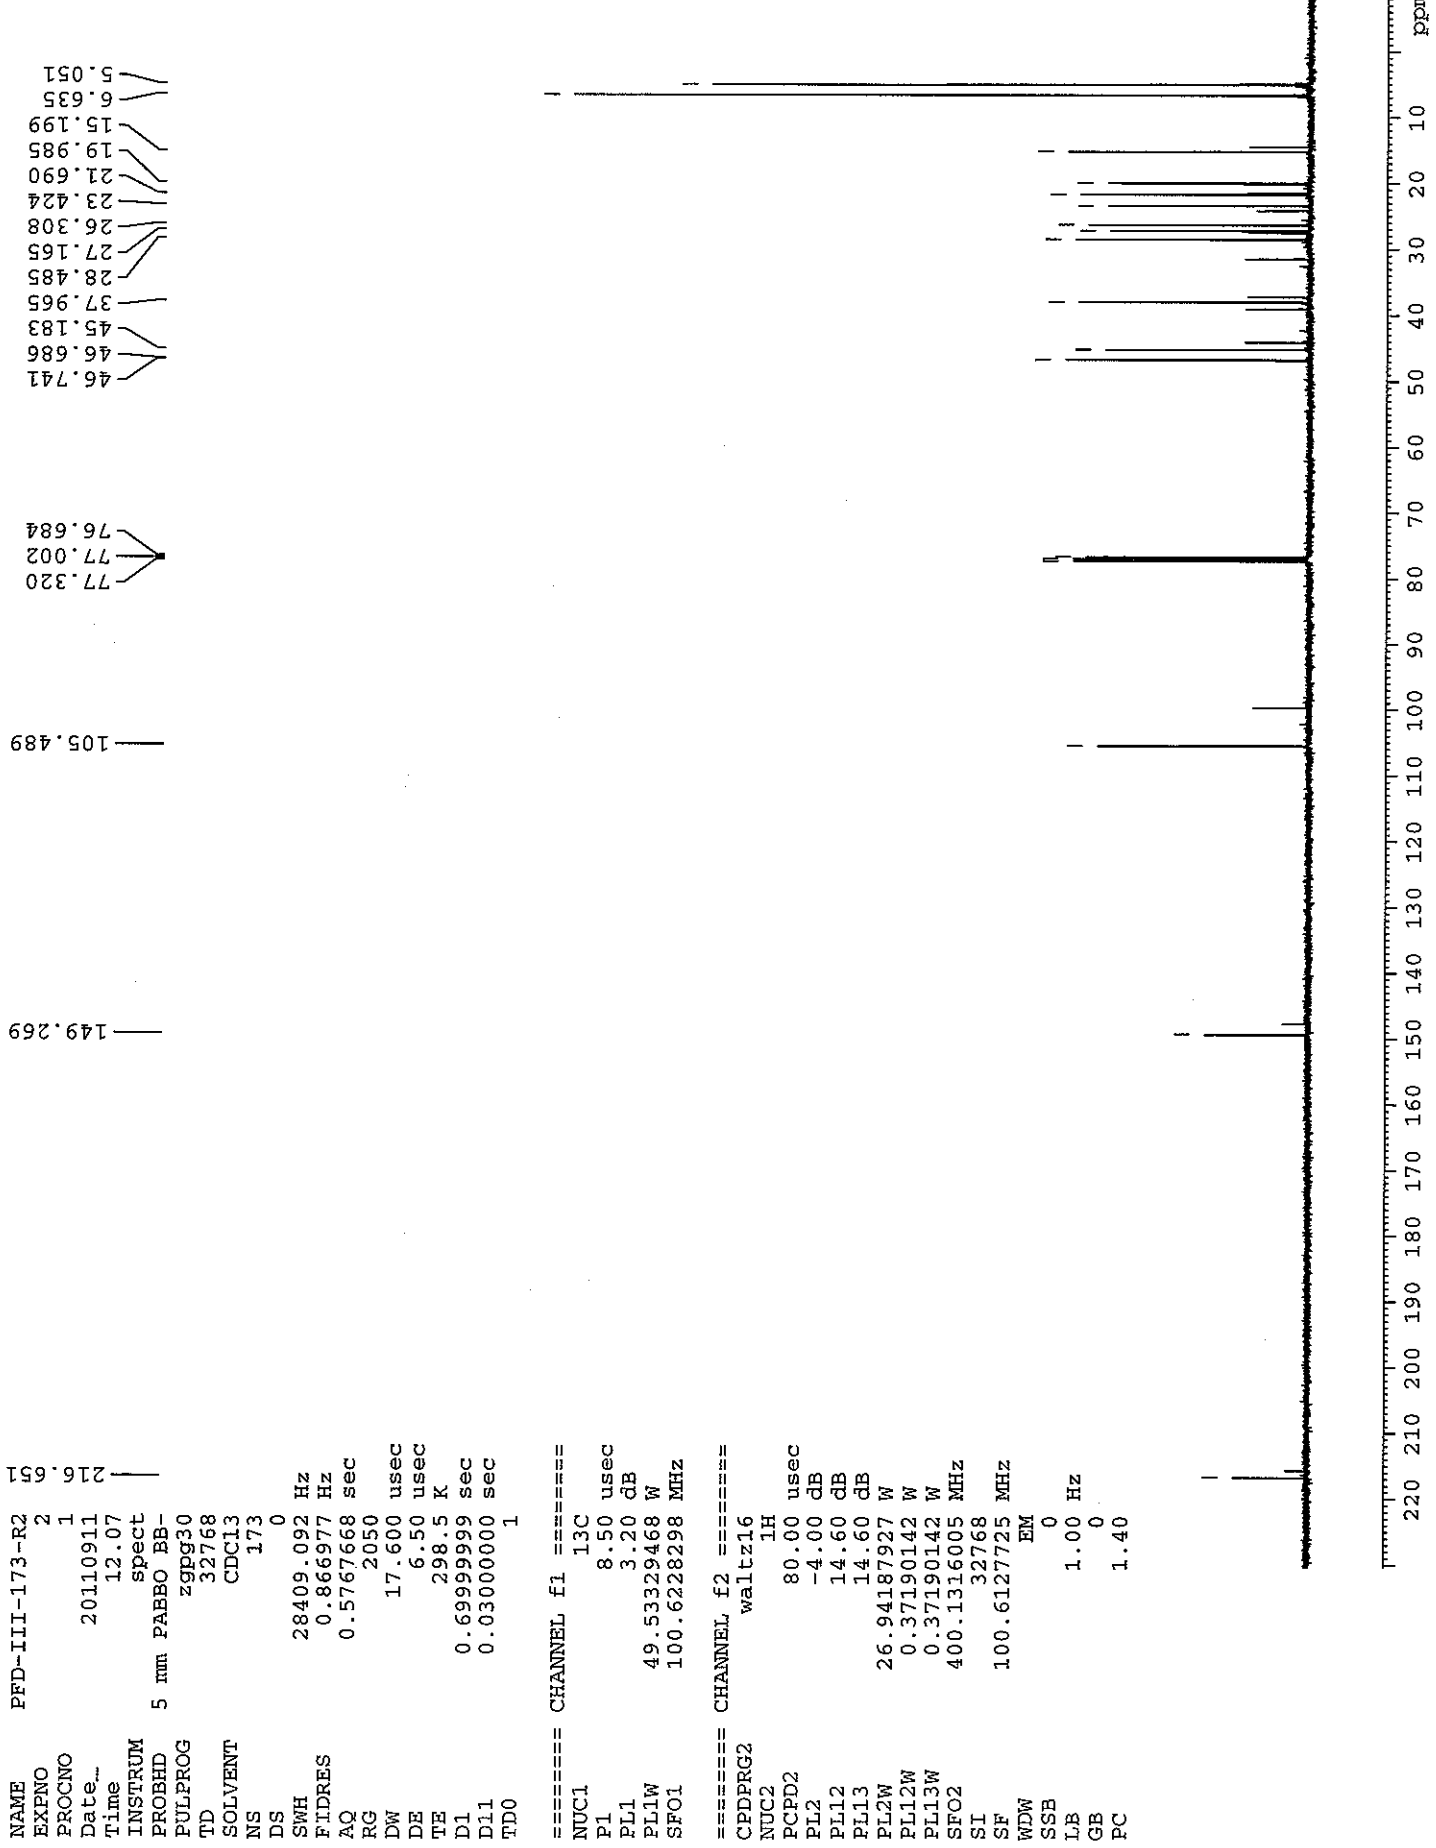

```

NAME PFD-III-173-R2
EXPNO 2
PROCNO 1
Date_ 20110911
Time 12.07
INSTRUM spect
PROBHD 5 mm PABBO BB-
PULPROG zgpg30
TD 32768
SOLVENT CDC13
NS 173
DS 0
SWH 28409.092 Hz
FIDRES 0.866977 Hz
AQ 0.5767668 sec
RG 2050
DW 17.600 usec
DE 6.50 usec
TE 298.5 K
D1 0.69999999 sec
D11 0.03000000 sec
TD0 1
    
```

```

===== CHANNEL f1 =====
NUC1 13C
P1 8.50 usec
PL1 3.20 dB
PL1W 49.53329468 W
SFO1 100.6228298 MHz

===== CHANNEL f2 =====
CPDPRG2 waltz16
NUC2 1H
PCPD2 80.00 usec
PL2 -4.00 dB
PL12 14.60 dB
PL13 14.60 dB
PL2W 26.94187927 W
PL12W 0.37190142 W
PL13W 0.37190142 W
SFO2 400.1316005 MHz
SI 32768
SF 100.6127725 MHz
WDW EM
SSB 0
LB 1.00 Hz
GB 0
PC 1.40
    
```

Current Data Parameters  
NAME PFD-III-176  
EXFNO 1  
PROCNO 1

F2 - Acquisition Parameters

Date\_ 20110913  
Time 22.34  
INSTRUM spect  
PROBHD 5 mm PABBO BB-  
PULPROG zg30  
TD 40498  
SOLVENT CDC13  
NS 28  
DS 0  
SWH 7500.000 Hz  
FIDRES 0.185194 Hz  
AQ 2.6999166 sec  
RG 36  
DW 66.667 usec  
DE 6.50 usec  
TE 299.9 K  
D1 1.00000000 sec

==== CHANNEL f1 =====  
NUC1 1H  
P1 15.00 usec  
PLW1 16.98200035 W  
SFO1 500.1332508 MHz

F2 - Processing parameters

SI 65536  
SF 500.1300134 MHz  
WDW EM  
SSB 0  
LB 0.30 Hz  
GB 0  
PC 1.40

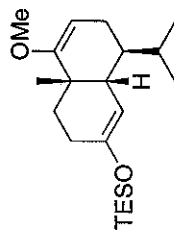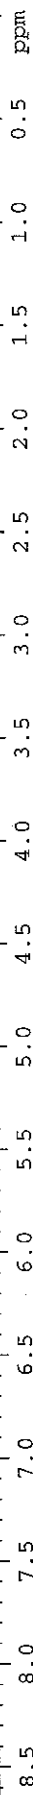

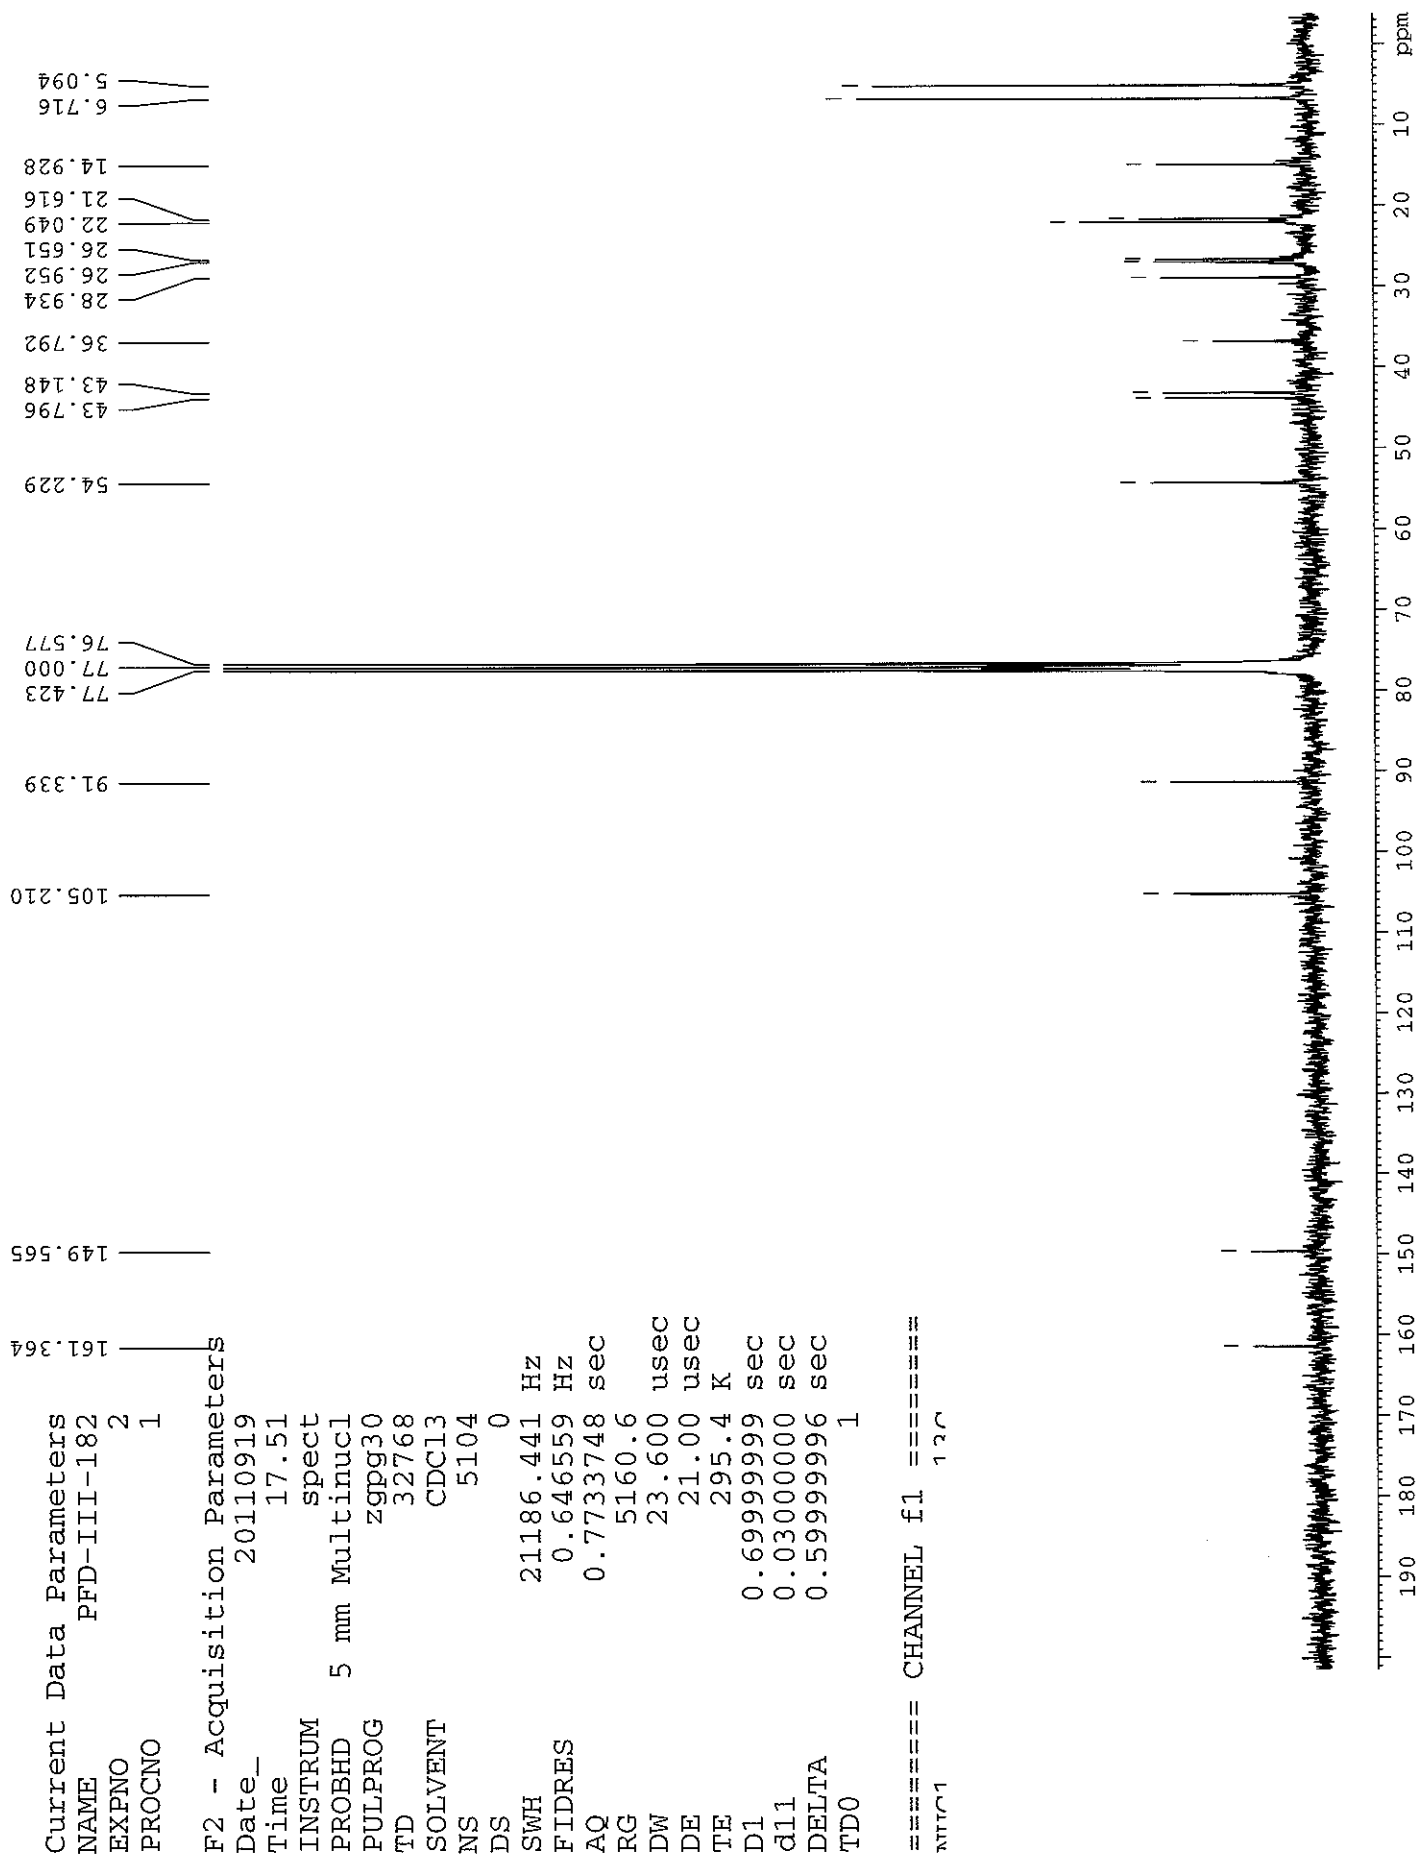



proton

NAME PFD-III-177  
EXPNO 1  
PROCNO 1  
Date\_ 20111002  
Time 16.36  
INSTRUM spect  
PROBHD 5 mm PABBO BB-  
PULPROG zg30  
TD 32768  
SOLVENT CDCl3  
NS 32  
DS 0  
SWH 6009.615 Hz  
FIDRES 0.183399 Hz  
AQ 2.7263477 sec  
RG 512  
DW 83.200 usec  
DE 6.50 usec  
TE 298.0 K  
D1 1.00000000 sec  
TD0 1

==== CHANNEL f1 =====  
NUC1 1H  
P1 9.50 usec  
PL1 -4.00 dB  
PL1W 26.94187927 W  
SF01 400.1328009 MHz  
SI 32768  
SF 400.1300088 MHz  
WDW EM  
SSB 0  
LB 0.20 Hz  
GB 0  
PC 1.40

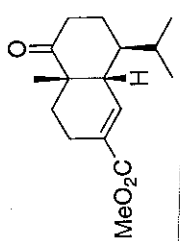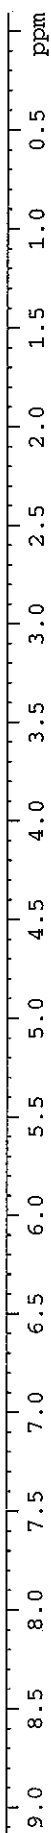

```

NAME          PFD-III-177
EXPNO         2
PROCNO        1
Date_         20111002
Time          16.44
INSTRUM       spect
PROBHD        5 mm FAPBO BB-
PULPROG       zgpg30
TD            32768
SOLVENT       CDCl3
NS            10080
DS            0
SWH           28409.092 Hz
FIDRES        0.866977 Hz
AQ            0.5767668 sec
RG            2050
DE            17.600 usec
TE            298.0 K
D1            0.69999999 sec
D11           0.03000000 sec
TD0           1

===== CHANNEL f1 =====
NUC1          13C
P1            8.50 usec
PL1           3.20 dB
PL1W          49.53329468 W
SFO1         100.6228298 MHz

===== CHANNEL f2 =====
CPDPRG2       waltz16
NUC2          1H
PCPD2         80.00 usec
PL2           -4.00 dB
PL12          14.60 dB
PL13          14.60 dB
PL2W          26.94187927 W
PL12W         0.37190142 W
PL13W         0.37190142 W
SFO2         400.1316005 MHz
SI            32768
SF            100.6127699 MHz
WDW           EM
SSB           0
LB            1.00 Hz
GB            0
PC            1.40
    
```

215.611

167.533

140.422

128.815

77.316  
 76.999  
 76.681

51.728  
 46.200  
 45.883  
 37.793  
 29.687  
 27.723  
 27.452  
 23.661  
 21.559  
 21.188  
 20.201  
 15.587

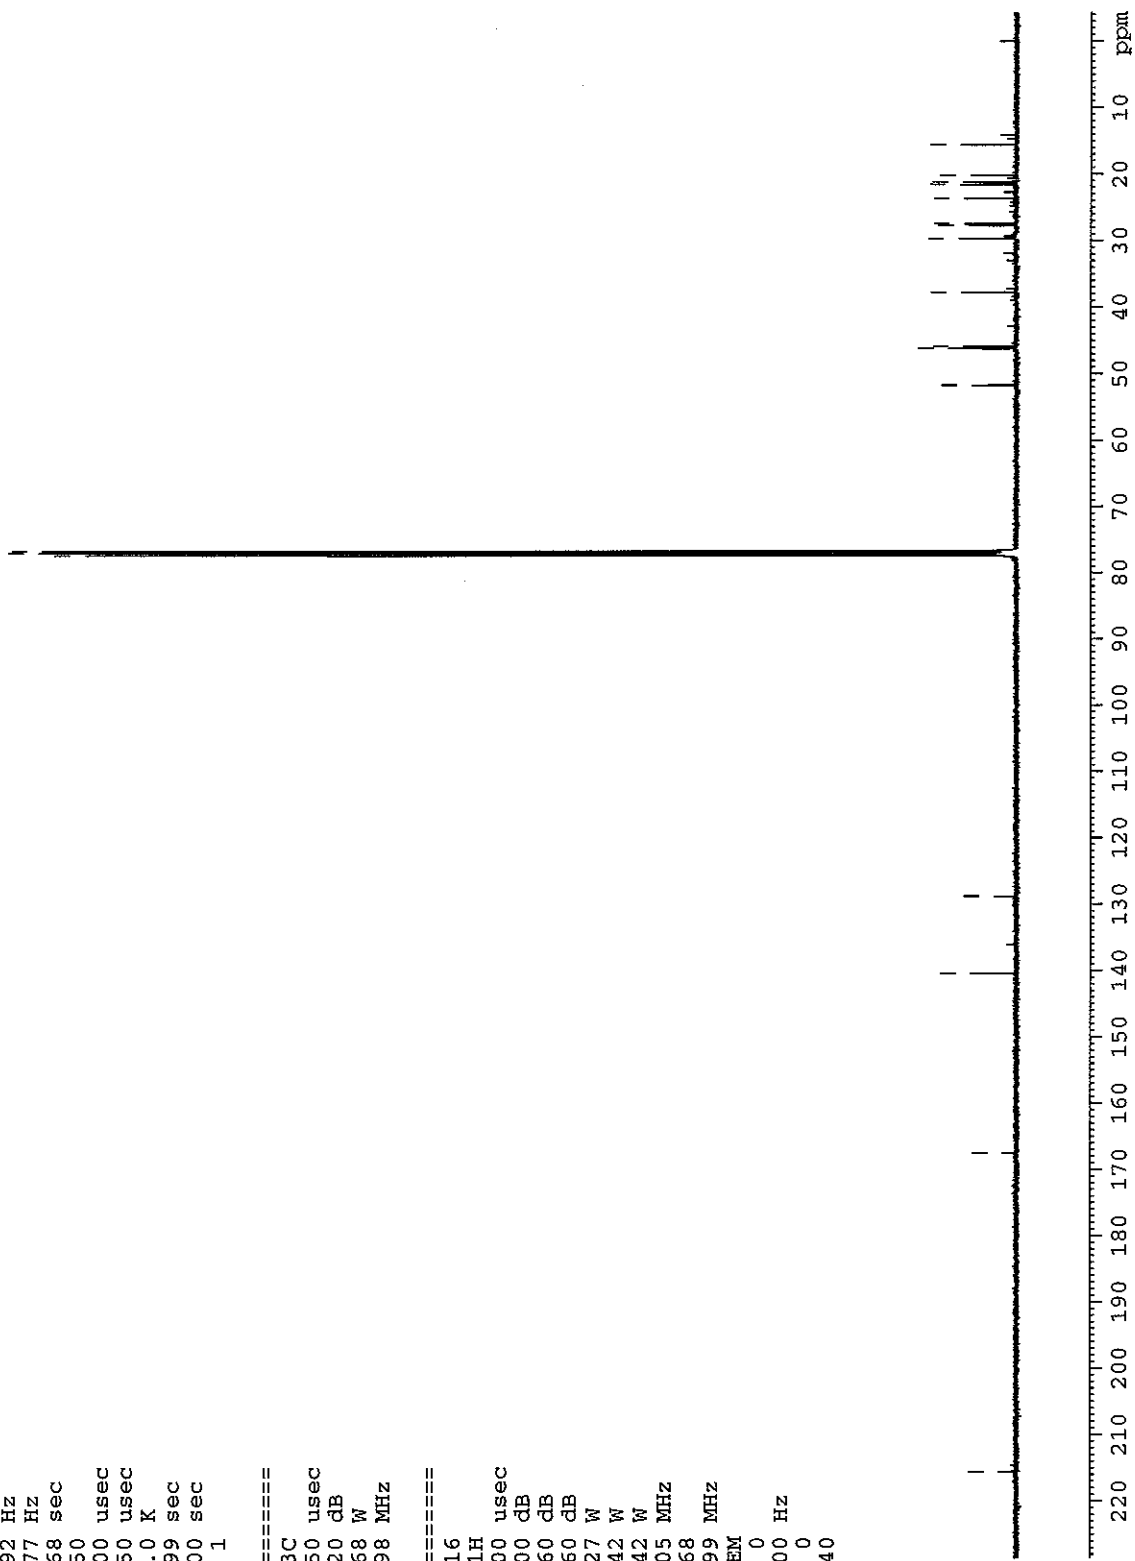

proton

NAME PFD-III-178-R3  
EXPNO 1  
PROCNO 1  
Date\_ 20111004  
Time 23.58  
INSTRUM spect  
PROBHD 5 mm PABBO BB-  
PULPROG zgpg  
TD 32768  
SOLVENT CDC13  
NS 32  
DS 0  
SWH 6009.615 Hz  
FIDRES 0.183399 Hz  
AQ 2.7263477 sec  
RG 456  
DW 83.200 usec  
DE 6.50 usec  
TE 298.0 K  
D1 1.0000000 sec  
TD0 1

===== CHANNEL f1 =====  
NUC1 1H  
P1 9.50 usec  
PL1 -4.00 dB  
PL1W 26.94187927 W  
SFO1 400.1328009 MHz  
SI 32768  
SF 400.1300089 MHz  
WDW EM  
SSB 0  
LB 0.20 Hz  
GB 0  
PC 1.00

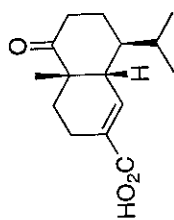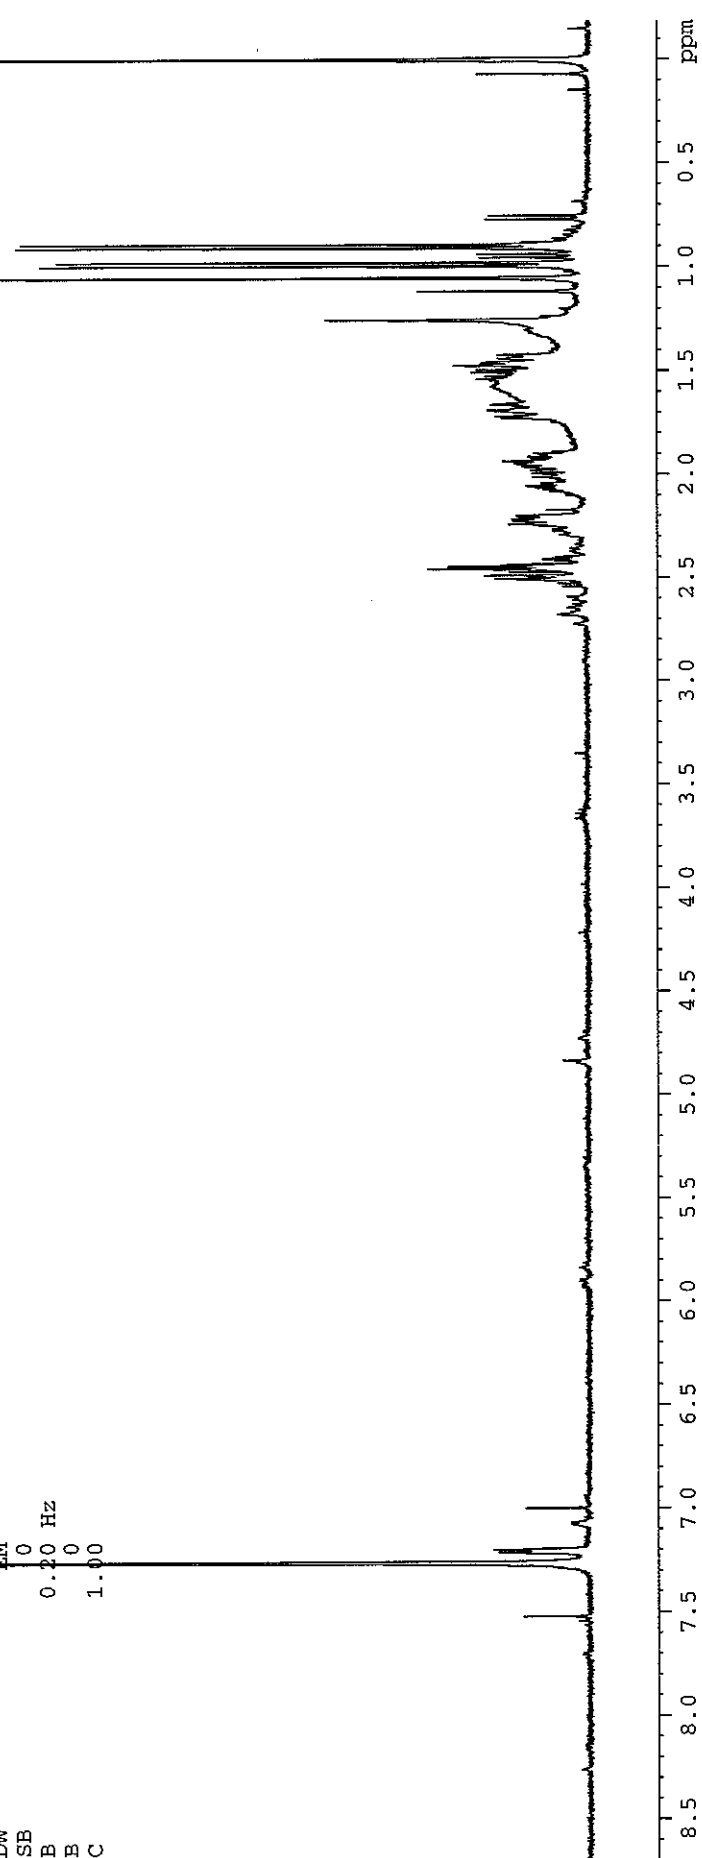

NAME PFD-III-178-R3  
 EXPNO 2  
 PROCNO 1  
 Date\_ 20111005  
 Time 0.03  
 INSTRUM spect  
 PROBD 5 mm PABBO BB-  
 PULPROG zgpg30  
 TD 32768  
 SOLVENT CDCl3  
 NS 27050  
 DS 0  
 SWH 28409.092 Hz  
 FIDRES 0.866977 Hz  
 AQ 0.5767668 sec  
 RG 2050  
 DW 17.600 usec  
 DE 6.50 usec  
 TE 298.1 K  
 D1 0.69999999 sec  
 D11 0.03000000 sec  
 TD0 1

==== CHANNEL f1 =====  
 NUC1 13C  
 P1 8.50 usec  
 PL1 3.20 dB  
 PL1W 49.53329468 W  
 SFO1 100.6228298 MHz

==== CHANNEL f2 =====  
 CPDPRG2 waltz16  
 NUC2 1H  
 PCPD2 80.00 usec  
 PL2 -4.00 dB  
 PL12 14.60 dB  
 PL13 14.60 dB  
 PL2W 26.94187927 W  
 PL12W 0.37190142 W  
 PL13W 0.37190142 W  
 SFO2 400.1316005 MHz  
 SI 32768  
 SF 100.6127699 MHz  
 EM  
 WDW 0  
 SSB 1.00 Hz  
 LB 0  
 GB 0  
 PC 1.40

46.217  
 46.117  
 46.022  
 37.760  
 27.646  
 27.546  
 23.710  
 21.521  
 20.937  
 20.274  
 15.632

169.968  
 142.855  
 128.014

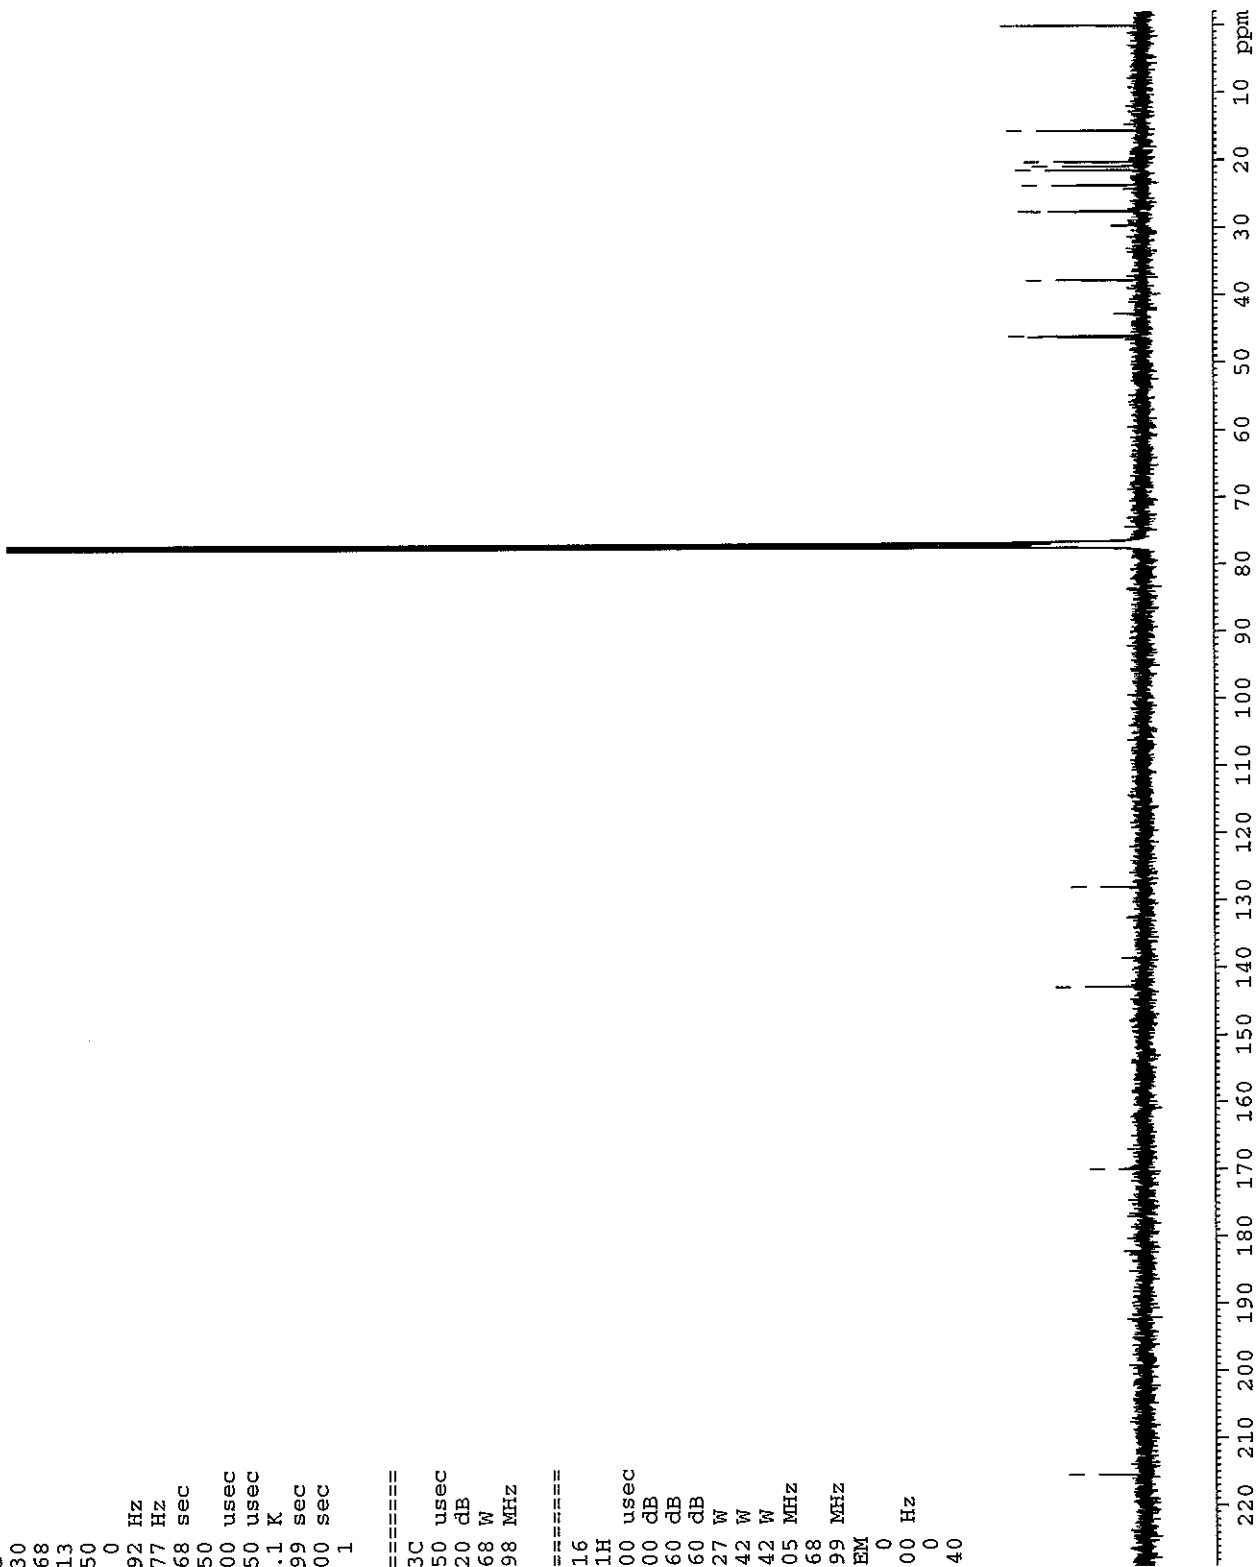

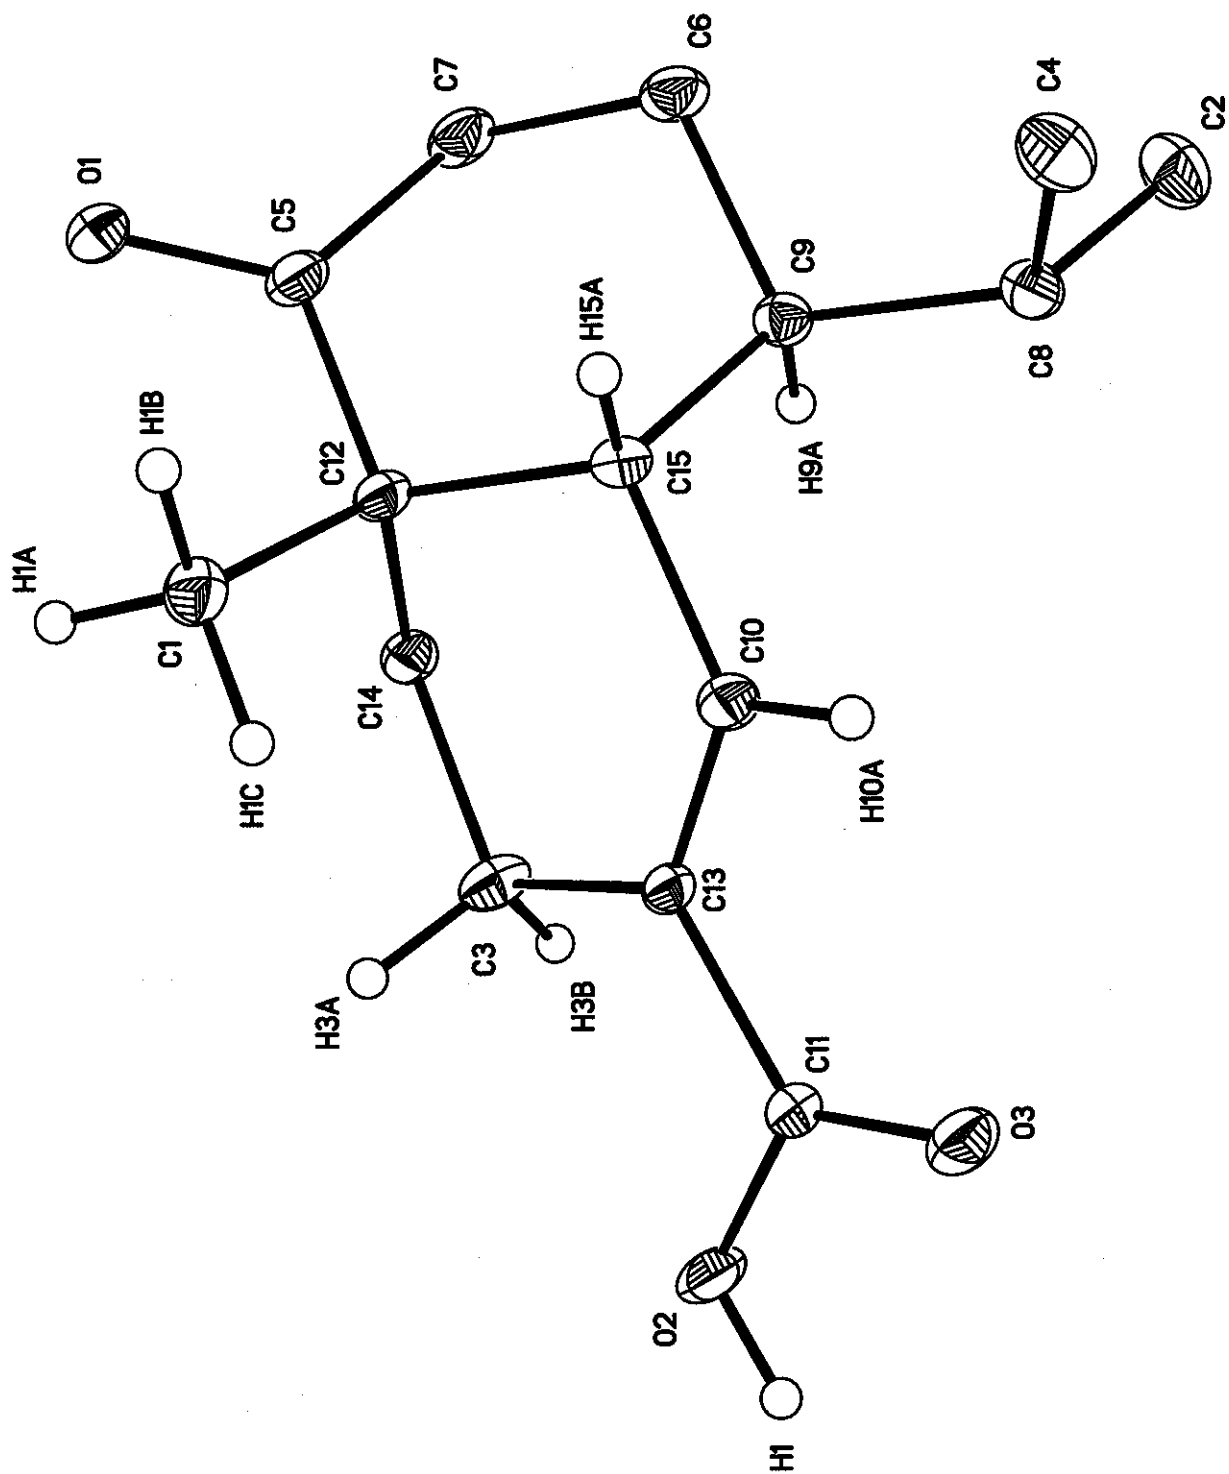

Supplement: c2sc20868g.pdf [file c2sc20868g.pdf]
